# Supplementary material for: mRNA inventory of extracellular vesicles from Ustilago maydis
Source: Preprints.org preprint supplement (doi:10.20944/preprints202106.0257.v1), 2021-06-09
Supplement: Supplementary file 1 [file supplementary]

## Sheet: Table S4
Table S3. Transcripts of known secreted proteins linked to virulence that were detected in this study					Axenic culture EVs & hyphal filament data from this study
GeneID	TranscriptID	Pedant annotation	Published name	Reference	EV_baseMean	Fil_baseMean	log2FC	lfcSE	pvalue	padj	EV_TPMmean	EV_TPMstdev	Fil_TPMmean	Fil_TPMstdev
UMAG_05294	KIS66294	hypothetical protein	Tin1-1	Brefort et al., 2014	N/A	N/A	N/A	N/A	N/A	N/A	N/A	N/A	N/A	N/A
UMAG_05295	KIS66295	hypothetical protein	Tin1-2	Brefort et al., 2014	N/A	N/A	N/A	N/A	N/A	N/A	N/A	N/A	N/A	N/A
UMAG_10553	KIS66297	hypothetical protein	Tin1-4	Brefort et al., 2014	N/A	N/A	N/A	N/A	N/A	N/A	N/A	N/A	N/A	N/A
UMAG_10554	KIS66298	hypothetical protein	Tin1-5	Brefort et al., 2014	N/A	N/A	N/A	N/A	N/A	N/A	N/A	N/A	N/A	N/A
UMAG_10556	KIS66307	hypothetical protein	Tin3	Brefort et al., 2014	N/A	N/A	N/A	N/A	N/A	N/A	N/A	N/A	N/A	N/A
UMAG_03313	KIS68746	effector family protein Eff1-3	Eff1-3	Khrunyk et al., 2010	N/A	N/A	N/A	N/A	N/A	N/A	N/A	N/A	N/A	N/A
UMAG_02239	KIS69712	hypothetical protein	See1	Redkar et al., 2015	N/A	N/A	N/A	N/A	N/A	N/A	N/A	N/A	N/A	N/A
UMAG_05306	KIS66306	hypothetical protein	UMAG_05306	Schilling et al., 2014	N/A	N/A	N/A	N/A	N/A	N/A	N/A	N/A	N/A	N/A
UMAG_05311	KIS66311	hypothetical protein	UMAG_05311	Schilling et al., 2014	N/A	N/A	N/A	N/A	N/A	N/A	N/A	N/A	N/A	N/A
UMAG_05318	KIS66317	hypothetical protein	UMAG_05318	Schilling et al., 2014	N/A	N/A	N/A	N/A	N/A	N/A	N/A	N/A	N/A	N/A
UMAG_11060	KIS67994	hypothetical protein	UMAG_11060	Schilling et al., 2014	N/A	N/A	N/A	N/A	N/A	N/A	N/A	N/A	N/A	N/A
UMAG_12217	KIS68652	hypothetical protein	UMAG_12217	Schilling et al., 2014	N/A	N/A	N/A	N/A	N/A	N/A	N/A	N/A	N/A	N/A
UMAG_05302	KIS66302	hypothetical protein	Tin2	Tanaka et al., 2014	N/A	N/A	N/A	N/A	N/A	N/A	N/A	N/A	N/A	N/A
UMAG_10067	KIS69651	hypothetical protein	Stp2	Ludwig et al., 2021	40.0304	18.1554	1.06188	0.294892	0.000119153	0.000287749	40.8936	7.13956	23.5816	5.22907
UMAG_02011	KIS70866	hypothetical protein	ApB73	Stirnberg et al.,2016	24.4017	10.7456	1.03149	0.408416	0.00415454	0.00785825	7.68271	3.7001	4.37095	0.736178
UMAG_11938	KIS69025	hypothetical protein	Scp2	Krombach et al., 2018	794.217	395.209	0.98828	0.14467	3.55355e-12	2.14596e-11	1444.3	155.272	909.73	72.0546
UMAG_01690	KIS70519	hypothetical protein	UMAG_01690	Schilling et al., 2014	64.3834	44.2176	0.493806	0.261922	0.045083	0.0686392	72.2704	18.5553	62.9771	17.1763
UMAG_01796	KIS70631	effector family protein Eff1-1	Eff1-1	Khrunyk et al., 2010	8.22425	5.32464	0.397464	0.538398	0.330465	0.396804	4.31221	2.84023	3.43815	1.802
UMAG_01236	KIS71336	hypothetical protein	Jsi1	Darino et al., 2021	2.30611	1.15569	0.31755	0.716336	0.417428	0.486303	0.821102	0.660623	0.571084	0.552834
UMAG_12226	KIS68804	hypothetical protein	Sta1	Tanaka et al., 2020	25.921	23.9378	0.1001	0.286908	0.70741	0.75585	34.2123	9.40252	39.8463	5.95864
UMAG_12197	KIS68887	hypothetical protein	Cce1	Seitner et al., 2018	2.57316	2.36708	0.0444932	0.618685	0.908607	0.926735	4.37809	4.00131	4.78582	2.73226
UMAG_00715	KIS72306	hypothetical protein	Stp3	Ludwig et al., 2021	2.8212	3.62368	-0.172179	0.587311	0.671123	0.721734	1.95809	1.48018	3.157	1.84173
UMAG_01987	KIS70839	hypothetical protein	Pep1	Doehlemann et al., 2009	2.56044	3.54726	-0.227873	0.600898	0.577635	0.64036	3.01831	2.63361	6.03839	3.49677
UMAG_11377	KIS70824	Effector family protein Eff1-2	Eff1-2	Khrunyk et al., 2010	1.02508	2.12521	-0.361768	0.724192	0.369173	0.437028	0.426708	0.492948	1.22961	0.768759
UMAG_12302	KIS66296	hypothetical protein	Tin1-3	Brefort et al., 2014	0.766118	1.91977	-0.380555	0.766198	0.326901	0.393182	1.01336	2.02672	3.01551	1.43375
UMAG_03023	KIS69044	related to Ribonuclease Trv	Nuc2	Mukherjee et al., 2020	3.07611	5.27637	-0.436913	0.601154	0.306235	0.371471	2.36782	1.78303	4.94105	1.8715
UMAG_01829	KIS70669	related to alpha-L-arabinofuranosidase I precursor	Afu1	Schilling et al., 2014	2.30761	4.30165	-0.482587	0.636849	0.268752	0.331831	0.756608	0.599302	1.71018	0.603904
UMAG_06223	KIS65845	hypothetical protein	UMAG_06223	Schilling et al., 2014	0	1.17426	-0.493962	0.96331	0.161918	0.213293	0	0	1.70044	1.03138
UMAG_03314	KIS68747	effector family protein Eff1-4	Eff1-4	Khrunyk et al., 2010	0.510745	2.1245	-0.619508	0.913129	0.15654	0.207394	0.209232	0.418464	1.32814	0.910061
UMAG_02475	KIS69963	hypothetical protein	Stp1	Schipper et al., 2009	11.8317	25.368	-0.935272	0.430805	0.0120644	0.0208218	5.20015	3.14879	13.999	3.72197
UMAG_02611	KIS69264	related to ribonuclease M	Nuc1	Mukherjee et al., 2020	114.955	233.956	-0.964267	0.263554	0.000108867	0.00026539	94.092	39.0033	244.2	39.38
UMAG_01695	KIS70525	hypothetical protein	Stp6	Ludwig et al., 2021	1.54599	6.85337	-1.51202	0.914112	0.0152048	0.0256659	0.319264	0.413076	2.02775	1.2473
UMAG_05731	KIS66950	secreted chorismate mutase	Cmu1	Djamei et al., 2011	332.782	1033.35	-1.59647	0.215801	2.84584e-14	2.15523e-13	256.369	34.9441	1003.25	286.128
UMAG_04342	KIS67238	hypothetical protein	Stp5	Ludwig et al., 2021	2.31149	13.8494	-2.29621	0.658822	7.24519e-05	0.000183257	0.483202	0.563142	3.59809	0.474579
UMAG_01375	KIS71480	cysteine-protease inhibitor	Pit2	Doehlemann et al., 2011	1.02253	7.63305	-2.36146	0.918412	0.00149804	0.00306706	2.21552	2.9368	18.2624	4.67595
UMAG_06098	KIS66006	related to extracellular elastinolytic metalloproteinase precursor	UmFly1	Ökmen et al., 2018	235.985	2449.47	-3.36515	0.142874	9.95797e-124	9.18979e-121	54.4022	9.94142	713.605	48.2509
UMAG_03274	KIS68706	hypothetical protein	Rsp3	Ma et al., 2018	0	5.47887	-5.10696	2.43367	8.09528e-05	0.000203326	0	0	1.80825	0.617539
