# Supplementary material for: mRNA inventory of extracellular vesicles from Ustilago maydis
Source: Preprints.org preprint supplement (doi:10.20944/preprints202106.0257.v1), 2021-06-09
Supplement: Supplementary file 2 [file Table_S1_Differential_enrichment_in_EVs_filaments.xlsx]

## Sheet: Tabelle1
Table S1. Differential enrichment of transcripts in EVs and filaments			Axenic EVs & 15-16 hpi filaments data from this study													Infection data (Lanver et al., 2018)
GeneID	TranscriptID	Pedant annotation	EV_baseMean	Fil_baseMean	baseMean	log2FC_EVvsFil	lfcSE	pvalue	padj	EV_TPMmean	EV_TPMstdev	Fil_TPMmean	Fil_TPMstdev	Full CDS coverage in EVs	Full CDS coverage in Filaments	Peak expression timepoint (dpi)	Lanver module
UMAG_02215	KIS69684	related to dibenzothiophene desulfurizing enzyme	146.26	0.485886	73.3732	8.00612	0.9837	2.01823e-15	1.6441e-14	63.4309	16.5472	0.288054	0.356576	Y	N	2	magenta
UMAG_02984	KIS69005	related to Dibenzothiophene desulfurization enzyme C	663.246	4.81058	334.028	7.08057	0.346211	1.03028e-92	3.69757e-90	334.609	15.9425	3.13797	0.436048	Y	N	4	magenta
UMAG_00102	KIS71661	hypothetical protein	8.71582	0	4.35791	6.23634	2.55189	1.78068e-06	5.7344e-06	6.18861	3.01231	0.180775	0.208995	N	N	12	light-cyan
UMAG_03995	KIS67946	related to JLP1 - Fe(II)-dependent sulfonate/alpha-ketoglutarate dioxygenase	1064.28	19.1152	541.7	5.78	0.228222	2.73583e-142	3.53469e-139	575.13	64.0295	12.9483	4.41375	Y	Y	4	magenta
UMAG_04370	KIS67267	hypothetical protein	484.702	12.5832	248.642	5.25276	0.267983	1.91471e-86	5.15375e-84	256.171	34.8055	8.25086	3.26897	Y	N	2	magenta
UMAG_06042	KIS65953	hypothetical protein	334.983	11.2056	173.094	4.87267	0.252592	2.06318e-83	5.12621e-81	184.818	2.3749	7.82123	2.59926	Y	N	4	magenta
UMAG_10632	KIS69137	related to ph-regulated antigen pra1 precursor	4.36973	0	2.18487	4.71842	2.50395	0.000360477	0.000811105	3.26435	1.85582	0.206086	0.2384	N	N	6	#N/A
UMAG_00145	KIS71705	related to p53-related protein kinase (isoform B)	2487.88	126.4	1307.14	4.28368	0.187939	3.55023e-116	2.86681e-113	827.079	120.767	53.2341	14.1996	N	N	12	cyan
UMAG_01433	KIS71540	related to Enoyl-CoA hydratase	327.827	15.8731	171.85	4.255	0.512952	6.86797e-18	6.79434e-17	267.473	48.8336	16.1979	12.9021	Y	Y	0	burlywood
UMAG_02006	KIS70861	hypothetical protein	665.804	34.8513	350.328	4.23946	0.209151	1.84562e-92	5.96136e-90	497.818	78.0717	32.8609	5.63307	Y	Y	1	red
UMAG_11874	KIS71550	hypothetical protein (C-terminal fragment)	75.9846	4.04722	40.0159	4.13894	0.436967	5.60765e-22	7.90948e-21	57.3038	18.6435	4.00419	1.53192	N	N	12	cyan
UMAG_01432	KIS71539	related to N6-hydroxylysine acetyl transferase	999.222	68.0732	533.647	3.84908	0.231048	1.97388e-63	2.9654e-61	523.875	99.6867	45.4352	16.7325	Y	Y	0	burlywood
UMAG_00133	KIS71693	related to acetylhydrolase	63.9181	4.84468	34.3814	3.65582	0.40103	1.38105e-20	1.71569e-19	19.926	1.49536	1.79816	1.52942	N	N	1	dark-green
UMAG_06404	KIS65704	probable thioredoxin peroxidase	7089.02	575.659	3832.34	3.61154	0.14447	5.16544e-139	5.56146e-136	7146.74	697.755	737.209	117.811	Y	Y	2	light-green
UMAG_02803	KIS69472	related to beta-1	170.05	13.6824	91.8664	3.58529	0.321952	7.90044e-30	1.91868e-28	68.1067	18.7584	6.9319	3.76904	Y	N	0	burlywood
UMAG_10186	KIS70081	hypothetical protein	8.4805	0.485886	4.48319	3.53736	1.09851	0.00030704	0.000698654	7.63572	2.79264	0.555305	0.651076	N	N	0	burlywood
UMAG_11980	KIS67389	hypothetical protein	7.44659	0.491085	3.96884	3.29448	1.1241	0.000687282	0.00148044	16.0225	4.52386	1.41108	2.14027	Y	N	0.5	#N/A
UMAG_10260	KIS70688	related to MXR1 - protein-methionine-s-oxide reductase	340.257	34.9247	187.591	3.25871	0.214403	3.5548e-53	3.14575e-51	352.279	49.9552	45.7017	12.1374	Y	Y	2	cyan
UMAG_03524	KIS68435	related to peroxisomal amine oxidase (copper-containing)	104.688	10.7828	57.7353	3.22329	0.322479	1.8819e-24	3.26803e-23	28.6474	8.02954	3.68943	0.741089	N	N	0.5	light-cyan
UMAG_05581	KIS66592	probable O-acetylhomoserine (thiol)-lyase	2389.87	257.144	1323.51	3.19502	0.191186	8.94457e-64	1.37576e-61	1183.08	127.186	161.956	46.9151	Y	Y	1	magenta
UMAG_01232	KIS71332	related to LAP3 - member of the GAL regulon	3447.93	383.273	1915.6	3.15615	0.151961	6.86202e-97	2.77054e-94	1383.4	101.846	195.255	36.3613	Y	Y	0.5	light-cyan
UMAG_04292	KIS67798	hypothetical protein	34.6299	4.29277	19.4613	2.88376	0.459219	4.97923e-11	2.68049e-10	46.4414	12.6754	7.26877	3.05699	Y	Y	1	red
UMAG_00496	KIS72075	mismatch base pair and cruciform DNA recognition protein Hmp1	41.3299	5.25045	23.2902	2.83582	0.482203	4.70059e-10	2.30568e-09	93.813	48.6161	15.6661	4.55326	Y	Y	1	dark-green
UMAG_03250	KIS68678	hypothetical protein	3467.12	505.639	1986.38	2.75973	0.169156	7.43673e-61	1.04437e-58	506.792	119.958	93.5704	10.705	Y	Y	0.5	red
UMAG_06374	KIS65672	related to GRE2 - methylglyoxal reductase (NADPH-dependent)	669.843	98.7287	384.286	2.74541	0.171366	8.61103e-59	1.09073e-56	410.808	28.1663	76.3927	15.3229	Y	Y	0.5	dark-green
UMAG_11528	KIS68046	related to AIF1 - mitochondrial cell death effector	298.049	43.9011	170.975	2.74393	0.183803	2.35464e-51	1.95013e-49	160.364	13.229	29.8766	5.54925	Y	Y	0.5	#N/A
UMAG_02851	KIS68863	hypothetical protein	2.56419	0	1.2821	2.60737	3.17064	0.0129912	0.0222844	2.87268	2.39495	0	0	N	N	2	magenta
UMAG_02429	KIS69915	hypothetical protein	1622.25	268.652	945.451	2.5732	0.178136	2.7676e-48	1.96469e-46	425.814	74.7128	89.2774	18.9813	Y	Y	6	magenta
UMAG_05068	KIS69995	probable Arylsulfatase	13.6096	1.93537	7.77249	2.55501	0.655772	1.50548e-05	4.2139e-05	5.5201	1.27199	1.10206	0.450984	N	N	4	magenta
UMAG_03753	KIS68173	hypothetical protein	37.7033	5.95363	21.8285	2.53511	0.437804	9.23039e-10	4.37479e-09	23.2403	8.10889	4.54467	1.80458	N	N	4	cyan
UMAG_03229	KIS68657	hypothetical protein	225.047	40.9288	132.988	2.42753	0.216011	3.18182e-30	7.81543e-29	118.19	20.5768	27.147	5.51592	Y	Y	0.5	dark-green
UMAG_10874	KIS70602	hypothetical protein	350.094	64.7183	207.406	2.41772	0.166305	8.38752e-49	6.15721e-47	311.488	34.5773	72.7513	4.65409	Y	Y	0	pink
UMAG_10465	KIS72148	probable FAB1 - phosphatidylinositol 3-phosphate 5-kinase	2993.24	556.231	1774.74	2.41071	0.157612	9.18246e-54	8.6805e-52	234.639	32.0689	55.3369	10.6242	N	Y	6	magenta
UMAG_01270	KIS71370	probable aminopeptidase P	1159.86	217.553	688.707	2.40184	0.129385	7.72801e-78	1.72148e-75	395.832	26.9491	94.4033	14.9843	Y	Y	4	salmon
UMAG_00553	KIS72134	related to GTPase activating protein sec2	1271.84	242.826	757.332	2.36568	0.179636	1.52022e-40	7.43985e-39	272.832	41.7682	66.396	14.9291	Y	Y	2	light-green
UMAG_00288	KIS71860	related to trna methyltransferase	101.414	19.1205	60.2671	2.365	0.243758	4.30673e-23	6.60842e-22	46.9387	5.00385	11.3213	2.16243	Y	N	4	magenta
UMAG_11033	KIS66145	hypothetical protein	164.544	31.3078	97.926	2.34707	0.258078	1.16359e-20	1.45675e-19	135.124	20.5219	32.8398	13.0981	Y	Y	0.5	dark-green
UMAG_04262	KIS67767	probable BNA6 - nicotinate-nucleotide diphosphorylase (carboxylating)	406.982	80.6089	243.796	2.30937	0.188618	2.27178e-35	7.89018e-34	301.026	37.6714	75.8808	19.8539	Y	Y	8	salmon
UMAG_01812	KIS70648	hypothetical protein	599.442	120.99	360.216	2.29392	0.14259	3.97084e-59	5.23503e-57	288.39	18.2812	73.9453	11.0828	Y	Y	0.5	dark-green
UMAG_01771	KIS70606	hypothetical protein	116.488	23.4892	69.9885	2.26498	0.256522	1.39985e-19	1.62644e-18	169.17	27.8973	43.4563	12.1585	Y	Y	4	cyan
UMAG_02223	KIS69693	related to acid phosphatase	56.7582	11.2701	34.0142	2.25946	0.326105	6.07238e-13	3.98654e-12	27.2002	6.77213	6.98905	1.54983	N	N	0.5	dark-green
UMAG_03305	KIS68737	MAP kinase	658.564	134.717	396.64	2.24208	0.257789	4.0459e-19	4.50629e-18	415.057	32.8954	107.986	45.7433	Y	Y	1	burlywood
UMAG_05544	KIS66553	probable calmodulin-dependent protein kinase type 1	405.803	85.9515	245.877	2.22259	0.153213	1.46091e-48	1.04861e-46	248.974	13.585	67.1343	9.47404	Y	Y	12	beige
UMAG_04484	KIS67382	probable choline-sulfatase	454.348	97.3245	275.836	2.18476	0.228792	1.64501e-22	2.42068e-21	161.128	13.4761	43.8066	16.5935	Y	Y	2	magenta
UMAG_11338	KIS71536	related to AIF1 - mitochondrial cell death effector	883.595	193.846	538.721	2.16795	0.164778	2.03837e-40	9.90067e-39	496.248	8.38243	138.477	33.7089	Y	Y	1	burlywood
UMAG_11662	KIS70293	related to ECM4 - involved in cell wall biogenesis and architecture	625.796	137.866	381.831	2.15835	0.181482	1.67102e-33	5.09189e-32	422.039	24.2273	118.015	30.5073	Y	Y	0.5	dark-green
UMAG_11399	KIS69748	related to DnaJ-like protein	294.933	65.195	180.064	2.1518	0.183501	1.30157e-32	3.73696e-31	132.123	24.1406	37.096	4.41202	Y	Y	1	green
UMAG_10080	KIS69716	probable theta class glutathione s-transferase	244.632	54.8293	149.731	2.13411	0.180157	3.20388e-33	9.36518e-32	207.338	13.8743	59.0101	10.2273	Y	Y	12	beige
UMAG_01235	KIS71335	hypothetical protein	87.5402	19.3824	53.4613	2.13017	0.248052	1.39145e-18	1.45921e-17	34.2152	1.27971	9.55998	2.26931	N	N	4	cyan
UMAG_00108	KIS71667	related to D-arabinitol 2-dehydrogenase	412.431	93.2384	252.835	2.12559	0.166036	2.15578e-38	9.10219e-37	246.925	26.5599	70.7592	9.80951	Y	Y	0.5	magenta
UMAG_04480	KIS67378	related to ADH2 - alcohol dehydrogenase II	1347.65	310.828	829.242	2.10354	0.133205	4.70054e-57	5.4224e-55	891.625	63.5512	259.665	30.7025	Y	Y	1	dark-green
UMAG_01861	KIS70703	related to alcohol dehydrogenase	1707.55	394.971	1051.26	2.10076	0.126056	3.19154e-63	4.68576e-61	1067.88	71.4659	312.684	22.985	Y	Y	0	burlywood
UMAG_00784	KIS72380	hypothetical protein	185.848	42.7657	114.307	2.0743	0.236753	2.80224e-19	3.18146e-18	92.3902	7.2339	26.9938	10.4716	Y	Y	0.5	light-cyan
UMAG_02888	KIS68902	related to ADH6 - NADPH-dependent alcohol dehydrogenase	30.5393	6.68363	18.6115	2.07063	0.403464	4.58688e-08	1.78825e-07	18.6186	2.69267	5.22148	2.49454	Y	N	4	cyan
UMAG_11430	KIS72077	related to CSR1 - phosphatidylinositol transfer protein	270.3	63.3067	166.803	2.06603	0.190239	2.57982e-28	5.68794e-27	104.002	9.51708	30.8762	8.00517	Y	Y	0.5	light-cyan
UMAG_11000	KIS65677	related to YCH1 - phosphatase	127.025	29.6814	78.3534	2.0459	0.249902	4.09378e-17	3.84387e-16	185.7	24.2204	55.228	20.5434	Y	Y	2	yellow
UMAG_02754	KIS69423	related to GSP1 - GTP-binding protein of the ras superfamily	1111.13	265.958	688.546	2.04209	0.166807	2.55574e-35	8.82892e-34	1190.67	88.1523	360.63	75.8603	Y	Y	0	yellow
UMAG_03304	KIS68736	hypothetical protein	2273.06	548.299	1410.68	2.03128	0.162374	9.30741e-37	3.62204e-35	2448.4	396.569	750.353	131.233	Y	Y	0	pink
UMAG_03767	KIS68187	hypothetical protein	120.904	28.7712	74.8378	2.02899	0.222098	1.07137e-20	1.34651e-19	131.369	9.51515	40.1866	11.5172	Y	Y	0	beige
UMAG_02388	KIS69872	related to subunit of the Arp2/3 complex	332.393	81.0526	206.723	2.01094	0.180009	8.35254e-30	2.02088e-28	474.692	61.44	146.21	27.5635	Y	Y	0	pink
UMAG_11414	KIS69181	related to AIM2 - cytoplasmic protein involved in mitochondrial function or organization	397.234	97.118	247.176	2.00733	0.183886	1.38419e-28	3.11564e-27	316.334	40.8098	97.6366	17.675	Y	Y	0.5	beige
UMAG_00415	KIS71991	hypothetical protein	2505.31	619.516	1562.41	1.99575	0.162202	1.24321e-35	4.3886e-34	340.004	58.8427	106.482	16.8954	Y	Y	1	magenta
UMAG_00384	KIS71959	hypothetical protein	9.5168	1.68983	5.60331	1.98235	0.872359	0.00274512	0.00535431	3.42442	3.09877	0.742593	0.277226	N	N	0	yellow
UMAG_11263	KIS70947	hypothetical protein (C-terminal fragment)	1429.42	355.629	892.527	1.97986	0.18776	7.77049e-27	1.58351e-25	365.428	50.396	115.325	30.3933	Y	Y	1	red
UMAG_11981	KIS67390	hypothetical protein	349.579	87.1899	218.384	1.97351	0.198646	4.3279e-24	7.18721e-23	315.807	26.1512	99.8342	28.6671	Y	Y	8	light-cyan
UMAG_02804	KIS69473	hypothetical protein	575.865	140.949	358.407	1.96476	0.296186	4.54717e-12	2.71485e-11	111.772	26.5323	34.1474	17.23	Y	Y	12	beige
UMAG_12105	KIS72089	probable PUP3 - 20S proteasome subunit beta3	742.828	188.089	465.458	1.96256	0.158534	5.00075e-36	1.84599e-34	810.838	97.7579	260.586	35.1508	Y	Y	0	yellow
UMAG_11629	KIS72409	hypothetical protein	16.1562	3.58807	9.87211	1.95542	0.539928	4.7258e-05	0.000122359	20.2668	6.45496	5.54863	1.10345	Y	Y	1	#N/A
UMAG_04686	KIS67587	hypothetical protein	14.1231	3.12371	8.62338	1.95062	0.55795	7.83981e-05	0.000197216	4.72004	0.828684	1.29194	0.272316	N	N	0	beige
UMAG_10769	KIS70213	probable potassium channel beta subunit protein	65.7246	16.3412	41.0329	1.94806	0.288036	2.18381e-12	1.34356e-11	41.4228	6.08617	13.1506	4.22104	Y	Y	0	beige
UMAG_04352	KIS67248	probable MOB1 protein	342.178	86.3495	214.264	1.94646	0.227643	1.82093e-18	1.88815e-17	351.572	19.6181	112.557	42.6939	Y	Y	2	magenta
UMAG_05830	KIS66089	hypothetical protein	41.0804	9.95259	25.5165	1.94393	0.348941	4.3202e-09	1.88826e-08	26.1544	4.92947	8.18074	3.29228	N	Y	8	cyan
UMAG_10419	KIS67766	chitinase	5812.65	1477.5	3645.08	1.93832	0.232554	1.28391e-17	1.25288e-16	2589.37	173.883	839.738	306.361	Y	Y	12	beige
UMAG_11849	KIS71064	hypothetical protein	1212.48	311.999	762.239	1.93327	0.180217	1.13149e-27	2.42838e-26	1265.2	167.842	411.793	97.4722	Y	Y	0.5	dark-green
UMAG_06292	KIS70204	probable PEP8 - vacuolar protein sorting/targeting protein	277.981	71.7747	174.878	1.93023	0.164661	1.63477e-32	4.63185e-31	208.354	8.70414	68.3533	13.1564	Y	Y	1	green
UMAG_02380	KIS69862	hypothetical protein	44.9348	11.187	28.0609	1.90447	0.356158	1.46885e-08	6.07866e-08	40.8785	13.3971	13.0019	3.74408	N	N	2	green
UMAG_10847	KIS67233	related to nadh-ubiquinone oxidoreductase subunit b17.2	504.036	133.762	318.899	1.89792	0.146208	2.46898e-39	1.12321e-37	829.326	67.2551	278.42	19.7269	Y	Y	0	yellow
UMAG_05883	KIS66144	hypothetical protein	131.937	34.5968	83.2671	1.88621	0.23525	1.79039e-16	1.57789e-15	115.846	7.73774	38.5715	13.7356	Y	Y	0.5	dark-green
UMAG_04827	KIS66765	probable PPZ2 - protein ser/thr phosphatase of the PP-1 family	557.082	149.311	353.197	1.88144	0.14893	2.26697e-37	9.1529e-36	250.669	6.17513	85.3354	16.5496	Y	Y	2	yellow
UMAG_11437	KIS72098	probable FRQ1 - regulator of phosphatidylinositol-4-OH kinase protein	549.48	147.444	348.462	1.87712	0.158184	2.88161e-33	8.46144e-32	643.899	42.0333	219.791	41.8928	Y	Y	0	yellow
UMAG_03221	KIS68648	hypothetical protein	444.866	116.569	280.718	1.87653	0.264548	2.01252e-13	1.37576e-12	174.834	6.04511	58.5251	27.0238	Y	Y	0.5	red
UMAG_00422	KIS71999	hypothetical protein	360.528	95.8519	228.19	1.87359	0.215853	6.28553e-19	6.90554e-18	238.915	58.8846	81.2499	14.928	Y	Y	8	salmon
UMAG_05520	KIS66527	hypothetical protein	181.92	48.0966	115.008	1.86567	0.257029	6.27901e-14	4.55757e-13	136.81	39.5603	46.2523	11.5743	Y	Y	0	burlywood
UMAG_05584	KIS66595	probable UTP-glucose-1-phosphate uridylyltransferase	8662.86	2349.38	5506.12	1.86552	0.145771	2.63752e-38	1.10639e-36	3806.18	346.628	1307.64	220.824	Y	Y	0	yellow
UMAG_10327	KIS68960	hypothetical protein	509.276	135.761	322.519	1.86426	0.233582	2.26559e-16	1.98316e-15	135.602	12.4595	46.0753	16.7256	Y	Y	4	green
UMAG_05607	KIS66619	probable DID2 - class E vacuolar-protein sorting and endocytosis factor	183.784	49.53	116.657	1.86165	0.19495	2.20595e-22	3.20235e-21	196.107	22.4193	67.1337	12.4155	Y	Y	4	salmon
UMAG_11520	KIS67898	probable Vacuolar ATP synthase subunit E	2059.05	562.209	1310.63	1.86107	0.124164	1.4333e-51	1.2183e-49	2022.98	108.017	699.049	72.1542	Y	Y	0	yellow
UMAG_10177	KIS70049	guanine nucleotide-binding protein alpha-1 subunit	1342.76	365.366	854.063	1.85128	0.18356	1.02381e-24	1.84229e-23	849.87	52.0437	292.863	78.2435	Y	Y	12	dark-green
UMAG_00866	KIS70941	related to Endoglucanase	375.317	102.701	239.009	1.84767	0.163107	1.61385e-30	4.04088e-29	232.117	29.5525	80.4665	10.7418	Y	Y	12	light-cyan
UMAG_01316	KIS71418	related to CLC1 - clathrin light chain	1446.67	396.846	921.759	1.84656	0.157528	1.55903e-32	4.4367e-31	1110.2	109.631	384.997	68.6997	Y	Y	0	yellow
UMAG_04501	KIS67401	hypothetical protein	79.8553	21.4478	50.6516	1.84224	0.274925	3.44467e-12	2.08357e-11	51.6799	7.25309	17.5198	5.96818	Y	Y	12	beige
UMAG_02678	KIS69338	related to VPS29 - involved in vacuolar protein sorting	323.905	88.3534	206.129	1.84135	0.201058	8.66211e-21	1.09291e-19	243.329	20.6089	84.3541	24.5748	Y	Y	0	yellow
UMAG_05498	KIS66506	related to putative oxysterol-binding protein OSBP	1535.42	425.488	980.452	1.83437	0.146777	1.26691e-36	4.90074e-35	859.637	89.0928	302.124	44.6081	Y	Y	0.5	dark-green
UMAG_01726	KIS70558	probable MET14 - ATP adenosine-5`-phosphosulfate 3`-phosphotransferase	239.962	66.9446	153.453	1.81451	0.189735	1.92063e-22	2.8119e-21	263.215	34.2827	93.1018	17.2051	Y	Y	0	burlywood
UMAG_01187	KIS71287	hypothetical protein	245.371	68.8792	157.125	1.80922	0.184171	1.47498e-23	2.35268e-22	232.725	11.2773	82.3118	15.702	Y	Y	0	pink
UMAG_01637	KIS70461	putative YKT6 - SNARE protein for Endoplasmic Reticulum-Golgi transport (isoform A)	902.538	256.548	579.543	1.80269	0.124015	1.21311e-48	8.80527e-47	923.417	42.3366	332.533	30.8981	Y	Y	2	red
UMAG_03182	KIS68612	probable delta(24)-sterol c-methyltransferase (erg6)	1879.39	533.759	1206.57	1.80252	0.131461	1.44992e-43	8.21624e-42	1210.45	82.6126	434.351	49.221	Y	Y	0	yellow
UMAG_11945	KIS69118	probable hexokinase	1276	361.839	818.918	1.80158	0.145615	6.22979e-36	2.28661e-34	554.49	93.9331	198.872	1.39979	Y	Y	2	yellow
UMAG_01881	KIS70726	related to Oxidoreductase	401.033	112.778	256.906	1.79672	0.204756	2.8562e-19	3.23702e-18	263.529	20.1583	94.0209	28.8906	Y	Y	4	light-cyan
UMAG_02850	KIS68862	hypothetical protein	90.6624	25.2633	57.9629	1.79102	0.248721	1.09537e-13	7.6581e-13	33.9757	7.37434	11.9954	2.27975	N	N	0.5	magenta
UMAG_10431	KIS67786	hypothetical protein	679.736	192.685	436.211	1.78966	0.188672	4.09377e-22	5.83792e-21	200.613	46.8173	72.212	14.2759	Y	Y	12	magenta
UMAG_02960	KIS68981	probable ser/thr protein phosphotase 2A regulatory subunit A	1002.35	287.445	644.896	1.78658	0.138186	5.31145e-39	2.36634e-37	382.917	28.0649	139.04	21.6081	Y	Y	0	yellow
UMAG_10552	KIS66288	related to Prolyl endopeptidase	676.93	193.312	435.121	1.78428	0.16823	4.85595e-27	9.99026e-26	190.613	17.3462	69.4288	16.2415	Y	Y	6	light-green
UMAG_12052	KIS72159	b mating type locus	2744.37	781.063	1762.71	1.78273	0.192651	3.6258e-21	4.75551e-20	1297.32	283.533	469.263	103.179	Y	Y	4	magenta
UMAG_01850	KIS70692	hypothetical protein	455.034	130.743	292.888	1.77177	0.185247	1.94826e-22	2.84103e-21	539.148	109.019	196.473	28.7743	Y	Y	0.5	red
UMAG_10221	KIS66428	hypothetical protein	15.924	4.09252	10.0082	1.76685	0.505405	8.55752e-05	0.000214165	8.19335	1.4508	2.73321	0.502047	N	N	0	beige
UMAG_03266	KIS68695	hypothetical protein	851.493	246.265	548.879	1.76601	0.168165	1.50395e-26	3.01724e-25	137.035	10.9894	50.5227	12.4135	N	Y	2	light-green
UMAG_01567	KIS70398	related to 2	192.005	55.3406	123.673	1.76429	0.196365	4.64099e-20	5.56229e-19	146.208	13.5903	53.6071	12.5168	Y	Y	0.5	dark-green
UMAG_06159	KIS65778	probable HEM12 - uroporphyrinogen decarboxylase	1135.49	329.523	732.506	1.76345	0.164054	1.02551e-27	2.21566e-26	613.937	107.769	224.666	26.3716	Y	Y	2	yellow
UMAG_03017	KIS69038	hypothetical protein	394.899	113.987	254.443	1.76107	0.196127	4.77156e-20	5.70819e-19	189.764	22.9211	69.4541	18.9487	Y	Y	0.5	red
UMAG_05362	KIS66367	probable hydroxymethylglutaryl-CoA synthase	1414.86	410.004	912.432	1.76001	0.18362	1.58983e-22	2.34482e-21	684.462	10.5238	250.479	64.5938	Y	Y	2	yellow
UMAG_12166	KIS70666	related to SPC1 - signal peptidase 10.8 kDa subunit	87.5228	24.9721	56.2474	1.75713	0.261011	3.00766e-12	1.8278e-11	225.704	44.9268	81.1579	19.896	Y	Y	8	cyan
UMAG_01799	KIS70634	hypothetical protein	1748.17	506.858	1127.52	1.75502	0.196985	8.83189e-20	1.04495e-18	1154.2	100.952	422.694	114.841	Y	Y	0.5	red
UMAG_04415	KIS67314	hypothetical protein	145.793	42.4553	94.1243	1.75202	0.191783	1.21506e-20	1.51824e-19	83.9673	6.8142	30.8958	2.9853	Y	Y	2	magenta
UMAG_02492	KIS69980	hypothetical protein	192.556	56.4636	124.51	1.74591	0.181179	1.01665e-22	1.5238e-21	92.8566	9.34086	34.3279	3.46094	Y	Y	4	magenta
UMAG_05856	KIS66115	hypothetical protein	345.48	101.544	223.512	1.74441	0.157325	2.69742e-29	6.43001e-28	183.216	13.8814	68.6068	12.3624	Y	Y	0	yellow
UMAG_01171	KIS71271	related to 4-coumarate-CoA ligase	236.924	69.5561	153.24	1.74333	0.172666	1.06798e-24	1.91643e-23	95.1708	12.0228	35.4745	4.21467	Y	Y	8	cyan
UMAG_05339	KIS66338	probable 2	2650.89	788.47	1719.68	1.74024	0.134503	8.07187e-39	3.52326e-37	2867.49	207.971	1079	128.151	Y	Y	0	yellow
UMAG_00525	KIS72103	probable UBC1 - E2 ubiquitin-conjugating enzyme	295.957	87.1269	191.542	1.73915	0.1713	5.99444e-25	1.08775e-23	290.767	41.2328	108.899	15.0037	Y	Y	0	yellow
UMAG_11650	KIS71255	related to Oxidoreductase	198.997	58.5798	128.789	1.73585	0.18527	1.36581e-21	1.87328e-20	109.009	12.2177	40.7996	8.16379	Y	Y	2	light-green
UMAG_10313	KIS69340	probable ARL1 - ADP-ribosylation factor	226.63	66.7159	146.673	1.73547	0.187117	3.29368e-21	4.35422e-20	275.543	36.4029	103.227	18.3381	Y	Y	2	light-green
UMAG_12206	KIS69064	hypothetical protein	357.952	103.929	230.94	1.72849	0.262712	8.1708e-12	4.76815e-11	933.239	309.927	342.261	86.3882	Y	Y	0	yellow
UMAG_02758	KIS69427	related to Chitinase A precursor	260.382	76.721	168.551	1.72405	0.220399	9.22894e-16	7.66311e-15	153.728	22.1239	57.2232	18.3214	Y	Y	0	beige
UMAG_00132	KIS71692	hypothetical protein	10.0229	2.42942	6.22616	1.70613	0.677187	0.00193804	0.00388811	4.49331	1.94217	1.39246	0.759924	N	N	0	burlywood
UMAG_01845	KIS70687	related to Exocyst complex component Exo70	263.389	79.2155	171.302	1.70533	0.174441	2.80227e-23	4.3516e-22	81.0018	2.97122	31.1472	7.97782	Y	Y	4	magenta
UMAG_11254	KIS70925	hypothetical protein	196.552	58.8766	127.714	1.70502	0.204946	1.65299e-17	1.59616e-16	427.232	86.7812	162.76	14.1763	Y	Y	0	yellow
UMAG_01817	KIS70653	hypothetical protein	167.823	50.6404	109.232	1.69976	0.194104	3.80297e-19	4.25774e-18	167.655	22.6673	64.2519	3.38289	Y	Y	1	red
UMAG_06051	KIS65962	hypothetical protein	291.543	88.5538	190.048	1.69694	0.164697	1.29798e-25	2.43749e-24	604.447	59.3892	232.501	30.8516	Y	Y	0	yellow
UMAG_04716	KIS66655	probable VMA5 - H -ATPase V1 domain 42 KD subunit	2809.77	853.252	1831.51	1.69482	0.172603	1.71631e-23	2.71085e-22	1582.97	214.403	609.038	135.654	Y	Y	2	yellow
UMAG_01101	KIS71193	probable prefoldin subunit 5	82.3617	24.6418	53.5018	1.68897	0.252257	4.21022e-12	2.52301e-11	111.415	20.6488	42.5598	5.95375	Y	Y	0	burlywood
UMAG_05659	KIS66873	hypothetical protein	831.017	254.693	542.855	1.68871	0.141633	1.73049e-33	5.24833e-32	170.564	15.8334	66.4478	11.3585	Y	Y	8	light-cyan
UMAG_04930	KIS67057	probable ZWF1 - glucose-6-phosphate dehydrogenase	1629.73	502.35	1066.04	1.68823	0.108651	3.61075e-55	3.82384e-53	725.869	18.9665	283.692	24.176	Y	Y	0	yellow
UMAG_12027	KIS66206	hypothetical protein	102.691	31.0441	66.8677	1.68729	0.212319	3.90823e-16	3.32828e-15	85.1669	5.45992	32.6673	5.28027	Y	Y	0	burlywood
UMAG_04598	KIS67502	related to Dynein intermediate chain 1	500.752	151.888	326.32	1.68635	0.203188	1.95244e-17	1.87133e-16	156.1	22.53	60.2419	16.8521	Y	Y	2	light-green
UMAG_02669	KIS69328	hypothetical protein	119.115	35.8634	77.4894	1.68584	0.223475	9.16997e-15	7.18036e-14	86.6704	8.72574	33.2351	10.6588	Y	Y	12	cyan
UMAG_02017	KIS70873	hypothetical protein	495.578	151.24	323.409	1.68434	0.179972	1.53722e-21	2.09946e-20	262.747	24.7334	102.241	25.6985	Y	Y	0.5	red
UMAG_01852	KIS70694	related to Epoxide hydrolase 1	326.084	100.201	213.142	1.6816	0.161448	3.9838e-26	7.7986e-25	161.914	18.7799	62.9421	8.90374	Y	Y	0	dark-green
UMAG_10487	KIS68107	probable ubiquitin-conjugating enzyme E2	265.43	81.414	173.422	1.67906	0.182668	7.19892e-21	9.15453e-20	398.787	63.041	154.401	11.5875	Y	Y	0	burlywood
UMAG_04899	KIS67026	aspartate semialdehyde dehydrogenase	1405.2	436.92	921.058	1.67363	0.121866	1.23506e-43	7.06059e-42	852.366	47.6882	335.244	15.9691	Y	Y	0	yellow
UMAG_01923	KIS70770	hypothetical protein	171.479	52.712	112.096	1.67114	0.195651	2.58483e-18	2.65048e-17	77.2682	8.82382	29.9834	5.30525	Y	Y	0	burlywood
UMAG_05627	KIS66838	related to XPT1 - xanthine phosphoribosyl transferase	242.545	75.1806	158.863	1.66406	0.183071	1.897e-20	2.33867e-19	213.169	32.6728	83.2843	7.41967	Y	Y	0	burlywood
UMAG_02985	KIS69006	hypothetical protein	270.466	83.3789	176.923	1.66333	0.202332	3.89278e-17	3.66046e-16	118.954	17.9375	46.5152	11.1505	Y	Y	2	magenta
UMAG_10873	KIS70601	related to DCS1 - non-essential hydrolase involved in mRNA decapping	154.803	47.0444	100.924	1.66327	0.257044	1.83749e-11	1.03326e-10	97.3119	15.4511	37.3103	14.5585	Y	Y	8	salmon
UMAG_01903	KIS70748	related to succinyl-coa ligase [gdp-forming] alpha-chain	97.5273	29.8559	63.6916	1.66237	0.231513	1.40636e-13	9.72709e-13	60.9562	5.33523	23.6915	5.88353	Y	Y	0.5	dark-green
UMAG_02684	KIS69344	probable 26S proteasome non-atpase regulatory subunit Rpn6	841.591	264.345	552.968	1.65991	0.112984	1.43479e-49	1.10342e-47	448.215	28.5811	178.603	10.7631	Y	Y	0	yellow
UMAG_11177	KIS66593	probable CAP2 - F-actin capping protein	555.624	173.874	364.749	1.65674	0.149988	4.52076e-29	1.05812e-27	384.93	38.228	153.08	21.5523	Y	Y	0	yellow
UMAG_03943	KIS67887	related to RKM5 - protein lysine methyltransferase	80.0979	24.4969	52.2974	1.65358	0.248607	6.01537e-12	3.54555e-11	57.1432	7.96277	22.2344	6.23265	Y	Y	2	yellow
UMAG_12002	KIS66705	hypothetical protein	200.813	62.4681	131.64	1.65334	0.187875	2.76698e-19	3.14695e-18	144.202	19.6244	57.2182	12.1354	Y	Y	0	burlywood
UMAG_11157	KIS67031	hypothetical protein	1215.56	382.104	798.832	1.65201	0.143461	2.16642e-31	5.7357e-30	783.293	90.3604	313.263	52.5994	Y	Y	4	salmon
UMAG_10832	KIS68732	probable PFY1 - profilin	862.302	270.833	566.568	1.64966	0.160552	1.73789e-25	3.23538e-24	1519.56	119.085	604.153	105.293	Y	Y	2	light-green
UMAG_10665	KIS68201	related to acyl-CoA dehydrogenase	131.708	41.0607	86.3843	1.64757	0.196972	1.26006e-17	1.23333e-16	66.5026	4.26098	26.458	5.06122	Y	Y	0.5	dark-green
UMAG_02978	KIS68999	hypothetical protein	782.663	242.153	512.408	1.64166	0.247995	6.70933e-12	3.93663e-11	470.137	75.3521	183.759	70.9713	Y	Y	1	dark-green
UMAG_11939	KIS69028	related to DAP1 û heme-binding damage response protein	274.947	86.6318	180.79	1.64141	0.172681	3.97231e-22	5.67724e-21	531.557	78.1102	212.033	29.39	Y	Y	4	salmon
UMAG_02365	KIS69844	probable CTP1 - Mitochondrial citrate transporter - member of the mitochondrial carrier (MCF) family	473.388	149.038	311.213	1.64114	0.177083	3.72588e-21	4.8723e-20	317.5	9.27213	126.969	33.549	Y	Y	2	yellow
UMAG_01904	KIS70749	related to succinyl-coa ligase [gdp-forming] beta-chain	212.597	66.6224	139.61	1.6407	0.197178	1.7459e-17	1.68085e-16	119.112	20.5277	47.3025	9.92792	Y	Y	0.5	dark-green
UMAG_11249	KIS70920	related to cyclopropane-fatty-acyl-phospholipid synthase	136.008	40.6287	88.3184	1.63971	0.355325	7.07599e-07	2.39575e-06	61.2848	15.38	23.3046	16.0489	Y	Y	0.5	dark-green
UMAG_04782	KIS66718	probable GUS1 - Glutamyl-tRNA synthetase	1315.36	416.438	865.897	1.63853	0.159751	2.15571e-25	3.99023e-24	349.3	39.2761	139.69	20.5753	Y	Y	2	yellow
UMAG_04399	KIS67300	probable succinate-fumarate transporter (mitochondrial)	387.045	122.735	254.89	1.63643	0.162643	1.59552e-24	2.80847e-23	268.282	14.8305	107.475	17.7465	Y	Y	1	dark-green
UMAG_05734	KIS66953	GTPase Rho1	2836.59	906.391	1871.49	1.63464	0.117352	8.26618e-45	4.89904e-43	3262.88	274.182	1315.74	70.5775	Y	Y	12	dark-green
UMAG_03688	KIS68109	probable fatty alcohol oxidase	91.4448	28.5185	59.9817	1.63242	0.244453	4.90401e-12	2.9198e-11	60.2624	13.6764	23.5891	2.81601	Y	Y	1	red
UMAG_01859	KIS70701	related to ribitol kinase	305.203	96.9423	201.072	1.62998	0.163711	4.92778e-24	8.14155e-23	110.192	8.5165	44.5382	9.50102	Y	Y	0	yellow
UMAG_02610	KIS69263	hypothetical protein	14.63	4.08508	9.35756	1.62901	0.517898	0.000321784	0.000728865	9.3572	2.24525	3.36315	0.928278	N	N	4	salmon
UMAG_00442	KIS72020	hypothetical protein	73.1438	22.2735	47.7086	1.62565	0.331481	1.78013e-07	6.37454e-07	18.537	2.14064	7.16559	4.18927	N	N	2	magenta
UMAG_00458	KIS72036	related to siroheme synthase	269.516	85.8112	177.664	1.62364	0.179425	2.90514e-20	3.53431e-19	196.236	34.1682	79.2766	9.99085	Y	Y	4	light-green
UMAG_02672	KIS69332	hypothetical protein	302.157	96.9411	199.549	1.62196	0.148003	1.24413e-28	2.81016e-27	378.378	25.0294	153.49	11.6357	Y	Y	0	yellow
UMAG_12312	KIS66896	hypothetical protein	2394.65	769.59	1582.12	1.61954	0.14534	1.5334e-29	3.69618e-28	370.748	47.5727	151.38	25.8062	N	Y	0.5	red
UMAG_03318	KIS68752	related to APA2 - ATP adenylyltransferase II	260.75	82.7925	171.771	1.61587	0.219696	3.75095e-14	2.80128e-13	151.265	30.1714	60.8101	15.9138	Y	Y	2	light-green
UMAG_03838	KIS68257	probable arsenite translocating ATPase (ASNA1)	1750.06	555.451	1152.75	1.61446	0.223301	9.35439e-14	6.61153e-13	1178.18	209.201	468.134	129.526	Y	Y	2	light-green
UMAG_11479	KIS68848	probable ARC35 - subunit of the Arp2/3 complex	754.42	243.147	498.783	1.61301	0.155909	8.68902e-26	1.66068e-24	542.878	70.537	222.018	30.6861	Y	Y	0	pink
UMAG_12127	KIS71223	hypothetical protein	8.21199	1.93834	5.07516	1.61162	0.792329	0.00657451	0.0119773	9.90127	6.21386	2.72953	0.89024	N	N	4	light-green
UMAG_00163	KIS71725	related to Tubulin-specific chaperone B	136.774	43.72	90.2468	1.61159	0.198379	9.59622e-17	8.69447e-16	115.048	14.4061	46.8292	5.45011	Y	Y	2	yellow
UMAG_10290	KIS69278	probable AGX1 - alanine-glyoxylate transaminase	1978.16	642.893	1310.52	1.60845	0.12611	6.08921e-38	2.48964e-36	1133.31	130.629	466.521	27.9226	Y	Y	0	burlywood
UMAG_05334	KIS66333	probable DNA-directed RNA polymerase II chain Rpb7	129.878	41.4098	85.6442	1.60739	0.21414	1.29413e-14	1.00121e-13	170.361	22.1872	69.1361	18.5208	Y	Y	0	yellow
UMAG_00711	KIS72303	related to Proteasome activator complex subunit 3	122.943	39.2342	81.0885	1.60536	0.21408	1.38651e-14	1.06757e-13	104.022	10.6514	42.1661	11.0033	Y	Y	0.5	beige
UMAG_01058	KIS71148	probable APS3 - AP-3 complex subunit	61.3512	19.3261	40.3386	1.60534	0.26592	3.3879e-10	1.68872e-09	54.3133	6.83953	21.6507	5.11759	Y	Y	4	green
UMAG_11131	KIS67707	hypothetical protein	124.766	39.9793	82.3728	1.60505	0.21081	5.58696e-15	4.43388e-14	236.733	12.3299	96.0809	24.3295	Y	Y	1	red
UMAG_02801	KIS69470	probable NADP-specific glutamate dehydrogenase	9252.36	2976.86	6114.61	1.60389	0.195559	4.71821e-17	4.41733e-16	4545.01	303.236	1850.9	540.085	Y	Y	0.5	dark-green
UMAG_00432	KIS72010	probable proline iminopeptidase	533.606	172.173	352.89	1.60011	0.196286	7.19972e-17	6.57853e-16	339.623	83.7464	138.535	17.7045	Y	Y	0	pink
UMAG_03220	KIS68647	hypothetical protein	324.177	105.296	214.737	1.5987	0.174153	8.65749e-21	1.09291e-19	214.953	19.9674	87.9306	13.3319	Y	Y	0	burlywood
UMAG_04448	KIS67346	related to Myosin regulatory light chain 2-A	464.808	150.136	307.472	1.59773	0.195518	6.18743e-17	5.71012e-16	520.428	57.3705	213.702	59.547	Y	Y	0.5	burlywood
UMAG_03485	KIS68391	hypothetical protein	41.5578	12.9689	27.2634	1.59719	0.323038	1.5984e-07	5.75565e-07	52.857	11.3876	20.7923	2.98016	Y	Y	0.5	red
UMAG_10876	KIS70605	hypothetical protein	192.742	62.2956	127.519	1.59712	0.198743	1.91229e-16	1.68302e-15	189.318	35.6446	77.5037	7.66186	Y	Y	0	yellow
UMAG_10536	KIS67353	related to FPR2 - FK506/rapamycin-binding protein of the ER	411.093	134.126	272.609	1.59555	0.159764	3.56232e-24	5.94945e-23	608.934	75.9497	251.719	17.5216	Y	Y	6	cyan
UMAG_05693	KIS66909	probable rho GDP dissociation inhibitor	1127.22	366.242	746.731	1.59505	0.179378	1.2122e-19	1.4212e-18	1241.29	247.329	511.644	62.7731	Y	Y	2	light-green
UMAG_11726	KIS69404	hypothetical protein	138.827	44.3689	91.5978	1.59482	0.236263	3.10446e-12	1.88485e-11	99.276	15.6426	40.7709	13.7949	Y	Y	1	dark-green
UMAG_02064	KIS69525	probable VMA7 - H -ATPase V1 domain 14 kDa subunit	390.879	128.021	259.45	1.59246	0.149313	3.06431e-27	6.3651e-26	741.656	44.8106	308.31	38.3329	Y	Y	0	yellow
UMAG_03083	KIS69105	hypothetical protein	1895.27	618.221	1256.74	1.59225	0.169186	9.95572e-22	1.38013e-20	1624.01	275.235	671.557	93.6316	Y	Y	0	yellow
UMAG_12161	KIS70481	related to lipase family	277.105	89.0008	183.053	1.59178	0.238012	4.5114e-12	2.69599e-11	134.958	22.9002	54.7777	19.2554	N	Y	4	beige
UMAG_10647	KIS68653	probable PRE7 - 20S proteasome subunit(beta6)	781.861	256.752	519.306	1.59152	0.130844	1.02457e-34	3.32599e-33	605.906	36.2184	252.801	33.859	Y	Y	0	yellow
UMAG_11525	KIS67906	Protein phosphatase 2A	698.509	229.609	464.059	1.58535	0.152626	5.90716e-26	1.13572e-24	510.42	89.0652	212.525	15.9673	Y	Y	0	beige
UMAG_02384	KIS69866	a1-mating type protein Rba1	84.4352	27.3553	55.8953	1.5829	0.233028	2.37435e-12	1.45801e-11	157.44	16.4338	64.9454	10.8081	N	N	6	pink
UMAG_10286	KIS69271	probable NTF2 - nuclear transport factor	431.604	142.747	287.176	1.57578	0.157726	3.56414e-24	5.94945e-23	798.406	110.017	335.122	19.1885	Y	Y	0	yellow
UMAG_04932	KIS67063	related to ATG18 - Phosphatidylinositol 3	472.551	156.06	314.305	1.57098	0.178957	3.4793e-19	3.90891e-18	232.892	10.6584	97.9905	24.2903	Y	Y	0.5	green
UMAG_10002	KIS71573	related to NADH-dependent flavin oxidoreductase	60.5741	19.5345	40.0543	1.56806	0.290472	1.40421e-08	5.82607e-08	32.0757	4.49495	13.0608	4.27709	Y	Y	0	burlywood
UMAG_04179	KIS67675	probable multicatalytic endopeptidase complex chain PRE1	479.263	160.049	319.656	1.56592	0.143579	2.26386e-28	5.04295e-27	551.017	29.6128	232.868	29.9129	Y	Y	0	pink
UMAG_03523	KIS68434	probable aldehyde dehydrogenase	114.968	37.8311	76.3995	1.5659	0.213117	4.4091e-14	3.2589e-13	49.1981	5.5534	20.5184	3.34875	Y	Y	12	light-cyan
UMAG_10596	KIS69434	probable aldehyde dehydrogenase	481.085	157.865	319.475	1.56569	0.225277	7.42073e-13	4.84711e-12	210.086	12.7249	86.9294	29.9116	Y	Y	4	cyan
UMAG_10904	KIS67467	probable APT1 - adenine phosphoribosyltransferase	459.427	153.432	306.429	1.56271	0.156296	3.24005e-24	5.46494e-23	506.535	53.3919	213.555	19.7201	Y	Y	0	burlywood
UMAG_02149	KIS69614	hypothetical protein	61.1118	19.785	40.4484	1.55973	0.27709	3.98934e-09	1.75076e-08	21.102	2.21824	8.59104	3.17342	Y	Y	4	cyan
UMAG_11568	KIS70131	related to SWH1 - Member of an oxysterol-binding protein family	1478.44	483.554	980.998	1.55926	0.250254	9.46726e-11	4.9682e-10	272.799	77.2143	113.49	37.6691	Y	Y	0.5	red
UMAG_11276	KIS71161	hypothetical protein	896.738	301.715	599.227	1.5583	0.125918	7.67372e-36	2.78496e-34	1187.15	77.9661	506.322	38.0207	Y	Y	2	light-green
UMAG_10985	KIS67501	probable THR1 - homoserine kinase	790.285	266.132	528.208	1.55755	0.124095	8.41749e-37	3.31567e-35	495.963	40.6511	211.533	9.89743	Y	Y	0	yellow
UMAG_00126	KIS71685	related to Chitin deacetylase 1	660.688	221.416	441.052	1.55741	0.154706	1.62508e-24	2.85272e-23	281.914	40.8986	119.347	11.9071	Y	Y	0	yellow
UMAG_04182	KIS67679	probable TYR1 - prephenate dehydrogenase (NADP )	327.269	108.855	218.062	1.55683	0.192024	1.09831e-16	9.84065e-16	156.695	7.71972	66.1026	18.3004	Y	Y	0	dark-green
UMAG_01049	KIS71139	probable acyl-CoA dehydrogenase	576.033	193.896	384.965	1.55362	0.1412	8.0491e-29	1.85043e-27	303.864	28.0801	129.531	17.7742	Y	Y	0.5	beige
UMAG_02495	KIS69983	related to 26S proteasome regulatory particle chain RPN9	1168.01	391.86	779.937	1.55355	0.162796	2.90736e-22	4.18297e-21	660.29	82.4728	279.591	38.407	Y	Y	0	yellow
UMAG_04871	KIS66811	probable PGK1 - phosphoglycerate kinase	4366.38	1476.19	2921.28	1.55237	0.118954	1.30426e-39	6.10546e-38	2345.75	115.68	1001.46	66.6438	Y	Y	0	yellow
UMAG_02410	KIS69894	hypothetical protein	29.2679	9.32737	19.2976	1.54612	0.351296	2.42252e-06	7.64134e-06	31.7724	2.12189	12.6587	1.31277	N	Y	4	magenta
UMAG_02415	KIS69901	related to anti-silencing protein 1	72.6258	23.9988	48.3123	1.54385	0.257809	4.66201e-10	2.29198e-09	92.8115	13.8776	38.6282	7.92064	Y	Y	0	yellow
UMAG_03449	KIS68354	septin 3	3093.58	1048.53	2071.05	1.5417	0.124936	6.66551e-36	2.43272e-34	1926.62	111.96	825.804	100.662	Y	Y	0	yellow
UMAG_01245	KIS71345	probable LEU2 - beta-isopropyl-malate dehydrogenase	2106.85	718.318	1412.58	1.54056	0.119402	9.4865e-39	4.09363e-37	1241.74	75.546	535.276	29.3438	Y	Y	2	light-green
UMAG_02592	KIS69244	related to 2-hydroxy-3-oxopropionate reductase	1684.04	574.106	1129.07	1.5391	0.126223	7.30418e-35	2.43222e-33	1024.4	67.9127	441.794	33.1418	Y	Y	0	burlywood
UMAG_00406	KIS71980	hypothetical protein	98.6067	32.8372	65.722	1.53346	0.252464	2.71177e-10	1.3654e-09	141.498	34.3837	59.7016	13.4214	Y	Y	0	beige
UMAG_10530	KIS67338	hypothetical protein	20.782	6.4039	13.5929	1.52627	0.445018	0.000129265	0.000310658	16.3149	4.27168	6.50268	2.41299	N	N	6	cyan
UMAG_11217	KIS65790	hypothetical protein	137.316	46.0621	91.6891	1.52465	0.248835	1.9272e-10	9.84169e-10	376.12	113.385	158.427	25.3436	Y	Y	0	yellow
UMAG_05761	KIS66980	EB1-like protein	532.734	180.777	356.756	1.5205	0.213498	2.30461e-13	1.56879e-12	409.446	61.8328	175.876	55.4141	Y	Y	2	yellow
UMAG_05625	KIS66836	hypothetical protein	402.863	138.131	270.497	1.51826	0.175773	1.28676e-18	1.35382e-17	693.644	85.5793	300.935	50.4852	Y	Y	0	yellow
UMAG_00816	KIS72417	probable thiamine biosynthesis protein nmt1	3621.61	1237.9	2429.76	1.51806	0.189069	2.11943e-16	1.85773e-15	2252.86	516.631	971.597	136.222	Y	Y	2	magenta
UMAG_01314	KIS71416	probable DLD2 - D-lactate dehydrogenase	426.918	147.746	287.332	1.51543	0.141508	2.03717e-27	4.25893e-26	166.366	7.10352	72.705	5.93491	Y	Y	0	yellow
UMAG_11183	KIS66627	hypothetical protein	7.70134	1.91681	4.80908	1.51159	0.790943	0.00948286	0.016701	9.83414	7.25896	2.88723	0.482519	N	Y	0.5	red
UMAG_01933	KIS70781	hypothetical protein	230.058	78.8182	154.438	1.50849	0.212065	2.47976e-13	1.68093e-12	291.488	26.572	125.914	37.6572	Y	Y	0.5	red
UMAG_11595	KIS65920	hypothetical protein	73.413	24.8539	49.1335	1.50785	0.251708	4.84029e-10	2.36881e-09	168.031	26.9155	71.6452	16.2048	Y	Y	0	beige
UMAG_05986	KIS65897	probable PUP2 - 20S proteasome subunit (alpha5)	771.835	269.015	520.425	1.50625	0.129646	7.57812e-32	2.07435e-30	689.011	73.6504	304.524	19.4523	Y	Y	0	yellow
UMAG_10175	KIS70046	probable sphingosine-1-phosphate lyase	395.874	119.249	257.562	1.50552	0.524402	0.00072502	0.00155602	151.381	123.266	57.3966	2.80759	Y	Y	12	cyan
UMAG_04797	KIS66733	probable RPE1 - D-ribulose-5-phosphate 3-epimerase	295.952	102.627	199.29	1.50506	0.163008	6.02734e-21	7.74088e-20	212.461	14.129	93.6133	16.4059	Y	Y	12	beige
UMAG_04801	KIS66737	related to Glutathione S-transferase II	143.266	49.2086	96.2373	1.50449	0.205945	6.38497e-14	4.62409e-13	141.696	28.5791	61.5992	9.31396	Y	Y	8	light-cyan
UMAG_03265	KIS68694	hypothetical protein	411.437	142.817	277.127	1.50372	0.158305	4.90734e-22	6.96735e-21	281.676	34.9647	124.496	21.1909	Y	Y	2	yellow
UMAG_11511	KIS67827	related to YRA1 - RNA annealing protein	491.283	171.74	331.511	1.49922	0.140694	3.77425e-27	7.78968e-26	466.499	44.0714	206.442	21.6342	Y	Y	0	yellow
UMAG_10726	KIS66875	related to YPD1 - two-component phosphorelay intermediate	229.138	79.381	154.259	1.49761	0.192001	1.41552e-15	1.16339e-14	275.586	48.7758	121.294	16.5662	Y	Y	0	yellow
UMAG_02562	KIS69214	probable RPT2 - 26S proteasome regulatory subunit	1459.29	512.924	986.108	1.49693	0.116336	1.58498e-38	6.73617e-37	745.631	80.867	331.667	11.9797	Y	Y	0	yellow
UMAG_05100	KIS70026	hypothetical protein	2112.45	743.057	1427.75	1.49531	0.120094	3.22222e-36	1.21021e-34	2452.37	248.02	1091.46	30.3158	Y	Y	1	red
UMAG_03571	KIS68485	acetoacetyl-CoA thiolase	3657.86	1294.95	2476.4	1.48747	0.108779	3.10147e-43	1.74222e-41	2004.32	103.826	897.511	65.868	Y	Y	0	yellow
UMAG_00557	KIS72139	probable AMS1 - alpha-mannosidase	1951.5	680.544	1316.02	1.48606	0.198078	1.41206e-14	1.08594e-13	380.402	40.6767	168.45	48.7591	Y	Y	0.5	magenta
UMAG_05678	KIS66893	related to Glutathione S-transferase	220.166	76.9439	148.555	1.48551	0.193435	3.6631e-15	2.9469e-14	215.127	39.6186	95.1866	9.39902	Y	Y	0.5	beige
UMAG_03299	KIS68731	probable TPI1 - triose-phosphate isomerase	2495.98	883.473	1689.73	1.48516	0.124687	2.37671e-33	7.01074e-32	2245.66	113.169	1004.54	98.2004	Y	Y	0	yellow
UMAG_05686	KIS66901	hypothetical protein	2835.56	1009.31	1922.43	1.48206	0.0975895	9.98132e-53	8.71342e-51	2370.81	126.916	1068.88	45.3056	Y	Y	0	beige
UMAG_01816	KIS70652	related to TRM7 - tRNA 2`-O-ribose methyltransferase	257.915	90.82	174.367	1.4815	0.170827	9.85099e-19	1.06595e-17	166.374	23.0174	74.0904	6.19785	Y	Y	0.5	dark-green
UMAG_01022	KIS71110	hypothetical protein	251.821	87.8475	169.834	1.48129	0.21583	1.51172e-12	9.51821e-12	350.529	15.5369	154.183	46.6111	Y	Y	2	burlywood
UMAG_12007	KIS66824	related to cellulase	128.335	44.4241	86.3795	1.47975	0.247807	5.30515e-10	2.59238e-09	61.3428	18.0878	26.8067	3.52976	N	N	1	light-cyan
UMAG_03100	KIS69126	related to Dynein light chain 2B	169.398	58.9448	114.172	1.4795	0.222349	6.6047e-12	3.87876e-11	245.412	55.1046	108.606	25.2206	Y	Y	8	light-cyan
UMAG_04057	KIS68016	related to dihydroflavonol reductase	474.901	168.857	321.879	1.47761	0.129941	1.35908e-30	3.42955e-29	303.077	19.0631	136.467	9.34173	Y	Y	0	dark-green
UMAG_02849	KIS68861	probable GUK1 - guanylate kinase	181.125	63.5861	122.356	1.47477	0.202037	6.76705e-14	4.88437e-13	168.403	32.8742	75.2509	9.62864	Y	Y	0	yellow
UMAG_01197	KIS71297	related to 8-amino-7-oxononanoate synthase	136.314	48.1383	92.2261	1.47198	0.187775	1.09673e-15	9.05997e-15	61.4201	6.16092	27.6194	2.23129	Y	Y	0	pink
UMAG_00146	KIS71707	hypothetical protein	79.5483	27.6396	53.5939	1.47052	0.259688	3.45523e-09	1.52882e-08	79.5876	16.8325	34.853	6.26716	Y	Y	0.5	light-cyan
UMAG_10392	KIS68606	hypothetical protein	284.456	101.281	192.869	1.47043	0.151224	5.7215e-23	8.67626e-22	169.356	16.4299	76.5336	4.21157	Y	Y	8	magenta
UMAG_11638	KIS68899	related to glucosamine 6-phosphate n-acetyltransferase	229.792	81.6669	155.729	1.4694	0.165296	1.46539e-19	1.69649e-18	286.255	36.9548	128.762	8.93039	Y	Y	4	cyan
UMAG_12277	KIS67552	probable GIM3 - Gim complex component	105.469	37.0353	71.2523	1.46727	0.231243	5.18742e-11	2.78791e-10	180.018	21.1454	79.6531	18.8314	Y	Y	0	yellow
UMAG_06153	KIS65772	related to 4-coumarate--CoA ligase 1	106.283	37.549	71.9158	1.46597	0.200956	7.37074e-14	5.27882e-13	41.5306	4.04578	18.5315	1.45752	N	Y	4	cyan
UMAG_00622	KIS72205	probable RPT1 - 26S proteasome regulatory subunit	1553.63	554.339	1053.98	1.46512	0.158789	6.51684e-21	8.35293e-20	726.469	107.421	328.446	50.8363	Y	Y	0	yellow
UMAG_11382	KIS70846	probable 2-Nitropropane dioxygenase	317.341	113.849	215.595	1.46063	0.148607	2.02436e-23	3.17412e-22	203.823	22.7092	92.4479	2.42889	Y	Y	0.5	light-cyan
UMAG_01540	KIS70370	related to FMO1 - flavin-containing monooxygenase	521.854	187.811	354.833	1.45839	0.13572	1.49905e-27	3.16465e-26	201.515	17.422	91.9901	8.04669	Y	Y	2	light-green
UMAG_10416	KIS67755	hypothetical protein	230.569	81.5645	156.067	1.45699	0.212512	1.69707e-12	1.06026e-11	119.014	11.6544	53.8396	19.1208	Y	Y	0.5	red
UMAG_04497	KIS67397	probable ARG4 - arginosuccinate lyase	1430.3	515.163	972.732	1.45456	0.148661	3.07361e-23	4.73878e-22	682.919	24.8537	310.387	43.3588	Y	Y	0	yellow
UMAG_04138	KIS67635	probable TAL1 - transaldolase	6396.51	2311.22	4353.87	1.45447	0.127622	1.02808e-30	2.61473e-29	4435.56	197.11	2029.28	257.838	Y	Y	2	yellow
UMAG_03983	KIS67932	related to SEC65 - signal recognition particle subunit	324.708	117.23	220.969	1.45239	0.145706	5.08588e-24	8.35999e-23	192.977	9.12736	88.1149	8.3544	Y	Y	0	burlywood
UMAG_04605	KIS67510	hypothetical protein	236.663	85.1583	160.911	1.45055	0.16063	4.27928e-20	5.14788e-19	247.848	9.45612	113.512	20.3621	Y	Y	2	light-green
UMAG_02710	KIS69375	probable HHF1 - histone H4	563.951	203.022	383.487	1.44944	0.169501	2.88829e-18	2.95227e-17	1216.45	182.417	554.817	92.8538	Y	Y	0	yellow
UMAG_05901	KIS66163	related to BOS1 - vesicle specific SNAP receptor	97.0544	34.6338	65.8441	1.44747	0.208983	1.08847e-12	6.9896e-12	81.61	7.25476	36.7587	5.31551	Y	Y	2	light-green
UMAG_12299	KIS70003	hypothetical protein	84.9373	30.1861	57.5617	1.44723	0.232075	1.10124e-10	5.74171e-10	105.213	14.8379	47.4794	6.15905	Y	Y	8	light-cyan
UMAG_10712	KIS67177	hypothetical protein	352.477	127.085	239.781	1.44679	0.165063	4.58141e-19	5.09396e-18	210.617	9.60945	96.6974	21.9402	Y	Y	0.5	green
UMAG_02614	KIS69267	related to thiamine-phosphate diphosphorylase / hydroxyethylthiazole kinase	330.087	119.215	224.651	1.44648	0.156787	6.99239e-21	8.90944e-20	129.943	10.4637	59.8322	11.8116	Y	Y	8	yellow
UMAG_05848	KIS66108	related to galactoside O-acetyltransferase	157.549	56.4709	107.01	1.44635	0.198544	7.85062e-14	5.58535e-13	153.103	24.7	69.6312	8.17906	Y	Y	0	pink
UMAG_10158	KIS69931	probable adapter-related protein complex 1 beta 1 subunit	597.425	216.397	406.911	1.446	0.143514	1.74724e-24	3.05886e-23	174.598	8.50851	80.5524	16.0049	Y	Y	0	yellow
UMAG_06422	KIS65723	hypothetical protein	220.283	79.6023	149.943	1.4458	0.159513	3.14184e-20	3.8151e-19	123.357	11.5866	56.4844	6.02136	Y	Y	4	light-cyan
UMAG_04214	KIS67714	orotidine 5`-phosphate decarboxylase	959.451	342.046	650.749	1.44577	0.221164	1.46148e-11	8.31451e-11	757.99	216.572	341.36	75.3915	Y	Y	2	yellow
UMAG_04739	KIS66676	hypothetical protein	535.087	194.612	364.849	1.44415	0.132595	2.88355e-28	6.33597e-27	362.533	31.7104	166.573	9.43732	Y	Y	8	beige
UMAG_05503	KIS66510	related to vacuolar ATP synthase subunit H	2774.89	1002.89	1888.89	1.44366	0.168769	2.83118e-18	2.89848e-17	1052.79	99.0504	481.116	106.524	Y	Y	2	yellow
UMAG_11848	KIS71063	probable Myosin regulatory light chain cdc4	3035.85	1103.85	2069.85	1.44176	0.143214	1.8604e-24	3.24e-23	4825.47	762.373	2221.76	188.07	Y	Y	2	light-green
UMAG_06185	KIS65805	probable acyl-CoA dehydrogenase short-branched chain precursor	907.968	330.043	619.005	1.4393	0.154905	3.62921e-21	4.75551e-20	436.313	62.5438	201.011	22.5404	Y	Y	0	pink
UMAG_11300	KIS65781	hypothetical protein	530.911	192.907	361.909	1.43923	0.154588	3.14329e-21	4.17812e-20	454.675	63.983	209.471	32.8819	Y	Y	4	magenta
UMAG_01610	KIS70434	hypothetical protein	653.125	238.469	445.797	1.43669	0.143293	2.81597e-24	4.77459e-23	511.848	37.8669	235.989	26.535	Y	Y	12	dark-green
UMAG_01885	KIS70730	probable Alcohol dehydrogenase	128.847	46.3581	87.6025	1.43574	0.225782	4.80737e-11	2.59445e-10	81.3324	4.45072	36.7116	10.1165	Y	Y	12	green
UMAG_06234	KIS65858	probable SCL1 - 20S proteasome subunit (alpha1)	1253.45	457.128	855.289	1.43466	0.15377	2.57842e-21	3.45573e-20	917.351	66.8286	424.575	82.3569	Y	Y	0	yellow
UMAG_03854	KIS68273	probable PDA1 - pyruvate dehydrogenase (lipoamide) alpha chain precursor	3273.43	1199.16	2236.29	1.43438	0.129399	3.60744e-29	8.50514e-28	1780.01	189.611	823.811	43.2668	Y	Y	0	yellow
UMAG_01911	KIS70756	related to alcohol dehydrogenase	162.488	58.9743	110.731	1.4343	0.174685	5.60847e-17	5.21305e-16	97.808	8.50617	45.0695	5.77012	Y	Y	12	red
UMAG_00407	KIS71981	probable Tartrate dehydrogenase	112.192	40.4763	76.3341	1.43421	0.207507	1.19478e-12	7.63428e-12	69.8443	5.65289	31.8961	6.35741	Y	Y	8	cyan
UMAG_01530	KIS70361	probable FRS2 - phenylalanine--tRNA ligase beta chain	971.352	353.601	662.477	1.43335	0.13746	2.54022e-26	5.0183e-25	401.047	37.8059	184.31	19.07	Y	Y	2	yellow
UMAG_10041	KIS71724	hypothetical protein	90.3125	32.2185	61.2655	1.433	0.246981	1.61055e-09	7.42095e-09	77.9087	14.0455	35.5675	8.86253	Y	Y	0	burlywood
UMAG_05924	KIS66188	probable ADK2 - adenylate kinase	150.698	54.8381	102.768	1.43229	0.175411	8.11403e-17	7.39304e-16	116.837	7.48511	53.7831	4.58722	Y	Y	6	cyan
UMAG_02923	KIS68938	related to HOR2 - DL-glycerol phosphatase	106.721	38.3725	72.5467	1.43029	0.233446	2.1855e-10	1.11255e-09	84.3858	17.4661	38.4007	3.74038	Y	Y	0	yellow
UMAG_11098	KIS68438	probable GLN1 - glutamate--ammonia ligase	10041.2	3681.41	6861.31	1.42697	0.123491	8.65595e-32	2.34947e-30	6322.46	465.402	2927.74	270.97	Y	Y	0	beige
UMAG_00700	KIS72292	related to Zinc-binding oxidoreductase	205.898	75.2171	140.557	1.42668	0.175353	1.0174e-16	9.19221e-16	129.385	5.49373	59.8589	12.0549	Y	Y	12	dark-green
UMAG_05942	KIS66207	related to monocarboxylate permease	32.361	11.1766	21.7688	1.4266	0.344296	8.43848e-06	2.4489e-05	13.1797	2.2439	5.69687	1.92389	N	N	8	cyan
UMAG_03599	KIS68512	probable CDC12 - septin	2973.68	1093.73	2033.71	1.42639	0.138407	1.6242e-25	3.03246e-24	1752.2	152.875	816.826	111.987	Y	Y	0	yellow
UMAG_05549	KIS66558	probable myo-inositol 1-phosphate synthase (MIPS)	3869.49	1409.4	2639.44	1.42576	0.190138	1.55167e-14	1.19047e-13	1537.58	81.8354	704.938	173.12	Y	Y	12	light-cyan
UMAG_02921	KIS68936	hypothetical protein	69.8279	25.0549	47.4414	1.42514	0.243907	1.30807e-09	6.08799e-09	54.5762	6.14556	25.1586	5.14844	Y	Y	0.5	light-cyan
UMAG_04429	KIS67329	probable histidinol-phosphate transaminase	451.751	166.048	308.9	1.42494	0.151481	1.25611e-21	1.73386e-20	234.256	19.3773	108.925	14.176	Y	Y	0	yellow
UMAG_11191	KIS66075	related to phenylacetyl-CoA ligase	323.958	119.206	221.582	1.42416	0.141069	1.48166e-24	2.61517e-23	119.357	2.47527	55.7867	7.59324	Y	Y	1	dark-green
UMAG_05406	KIS66414	endosomal t-SNARE	164.307	60.2014	112.254	1.42403	0.173354	5.36806e-17	5.01123e-16	121.837	9.97375	56.5995	2.05115	Y	Y	8	cyan
UMAG_04220	KIS67720	chorismate mutase	287.716	105.609	196.662	1.42391	0.164271	1.08206e-18	1.16307e-17	222.811	20.929	103.767	10.198	Y	Y	2	cyan
UMAG_01938	KIS70787	related to Epoxide hydrolase 1	105.774	38.1683	71.971	1.42282	0.230368	1.64158e-10	8.42973e-10	56.2214	12.2645	25.8589	4.09071	Y	Y	4	light-cyan
UMAG_11465	KIS69553	hypothetical protein	226.193	82.8134	154.503	1.41702	0.191853	3.88098e-14	2.88838e-13	205.527	40.8543	95.3573	16.0357	Y	Y	4	magenta
UMAG_03539	KIS68451	hypothetical protein	1804.18	669.597	1236.89	1.41626	0.125694	4.73526e-30	1.15433e-28	1214.11	107.664	570.434	56.3135	Y	Y	0	pink
UMAG_10448	KIS68390	probable clathrin assembly protein AP47	478.811	177.721	328.266	1.41539	0.128266	6.6909e-29	1.54369e-27	243.975	11.5075	114.736	12.908	Y	Y	0	yellow
UMAG_11631	KIS72415	hypothetical protein	639.509	237.175	438.342	1.41443	0.135645	4.73201e-26	9.20746e-25	105.683	12.2815	49.7977	6.29697	N	Y	4	magenta
UMAG_05860	KIS66119	probable PRE4 - 20S proteasome subunit (beta7)	636.54	235.944	436.242	1.41324	0.146623	1.36184e-22	2.02242e-21	533.652	44.0656	251.04	34.7634	Y	Y	0	yellow
UMAG_04908	KIS67035	hypothetical protein	769.945	285.808	527.877	1.41155	0.140725	2.66939e-24	4.57408e-23	678.723	66.445	318.58	28.8002	Y	Y	0	yellow
UMAG_03598	KIS68511	related to ENT2 - clathrin binding protein	349.92	129.44	239.68	1.41093	0.160066	3.08079e-19	3.47328e-18	158.685	15.8656	74.7011	14.3389	Y	Y	0	pink
UMAG_00095	KIS71654	related to Protein dltE	280.004	104.008	192.006	1.40613	0.163887	2.40518e-18	2.47411e-17	239.377	22.3878	112.218	12.8639	Y	Y	0	yellow
UMAG_00585	KIS72167	probable RPN5 - 26S proteasome regulatory subunit	1487.36	556.82	1022.09	1.40377	0.126425	3.04493e-29	7.2317e-28	604.543	47.2819	286.138	20.5333	Y	Y	0	yellow
UMAG_01269	KIS71369	hypothetical protein	924.457	346.733	635.595	1.40286	0.11843	5.75171e-33	1.6737e-31	443.875	25.4399	210.422	16.835	Y	Y	0	pink
UMAG_01783	KIS70618	related to Inosine-uridine preferring nucleoside hydrolase	322.171	117.694	219.932	1.40212	0.242196	1.7174e-09	7.87759e-09	169.208	15.6506	78.1902	30.3669	Y	Y	0	burlywood
UMAG_06167	KIS65787	probable PMI40 - mannose-6-phosphate isomerase	520.597	192.578	356.587	1.40072	0.196814	2.75621e-13	1.86246e-12	248.852	40.7085	116.989	31.0277	Y	Y	0	yellow
UMAG_10571	KIS68480	related to Rab proteins geranylgeranyltransferase component A 2	190.794	70.6693	130.732	1.39837	0.195951	2.45702e-13	1.66902e-12	67.6871	9.46241	31.751	7.07184	Y	Y	8	salmon
UMAG_10093	KIS71879	hypothetical protein	46.7067	16.7721	31.7394	1.39706	0.307654	1.40279e-06	4.59069e-06	46.9996	12.883	21.0972	2.65661	Y	Y	0.5	#N/A
UMAG_02782	KIS69451	probable vacuolar atp synthase subunit d	1858.82	701.495	1280.16	1.39534	0.110306	2.87458e-37	1.1534e-35	1138.14	42.2491	543.805	49.8121	Y	Y	0	yellow
UMAG_02167	KIS69633	hypothetical protein	217.904	81.3734	149.639	1.39482	0.178824	1.57819e-15	1.29216e-14	154.936	12.5568	73.121	13.4915	Y	Y	4	green
UMAG_04345	KIS67241	probable vacuolar atp synthase subunit g (vma-10)	1005.69	377.731	691.712	1.3945	0.145672	2.64471e-22	3.82212e-21	1830.11	226.873	871.621	84.4052	Y	Y	8	yellow
UMAG_00608	KIS72191	hypothetical protein	194.802	73.0219	133.912	1.39072	0.170244	8.13834e-17	7.40475e-16	170.645	13.176	81.0078	11.2115	Y	Y	0	beige
UMAG_03692	KIS68113	probable alpha-glucosidase (maltase)	200.006	74.758	137.382	1.3895	0.177735	1.43025e-15	1.17401e-14	75.9851	5.73709	36.209	8.31478	Y	Y	0	burlywood
UMAG_04005	KIS67957	hypothetical protein	77.5311	28.6674	53.0992	1.38862	0.228716	3.37108e-10	1.68164e-09	60.7783	7.24855	28.5307	4.33999	Y	Y	8	light-cyan
UMAG_05405	KIS66413	probable actin-like protein ACT2	749.087	283.9	516.493	1.38829	0.11642	2.27385e-33	6.73811e-32	423.849	10.008	203.171	11.9537	Y	Y	0	yellow
UMAG_05161	KIS70088	related to Phosducin	686.85	257.308	472.079	1.38747	0.184164	1.24227e-14	9.62241e-14	412.876	38.2826	195.456	48.3223	Y	Y	2	magenta
UMAG_11012	KIS68798	hypothetical protein	229.987	86.3565	158.172	1.38685	0.173229	3.09394e-16	2.67561e-15	270.97	28.1322	129.145	19.836	Y	Y	0	yellow
UMAG_04430	KIS67330	probable esterase D	475.466	179.676	327.571	1.38616	0.137654	1.97614e-24	3.42248e-23	373.839	22.9995	179.397	27.0373	Y	Y	12	light-cyan
UMAG_00547	KIS72128	probable PRO3 - delta 1-pyrroline-5-carboxylate reductase	227.448	85.7482	156.598	1.38561	0.159782	1.11606e-18	1.19366e-17	165.435	12.5877	79.0013	7.49537	Y	Y	2	yellow
UMAG_00673	KIS72263	probable het-c2 protein	2439.42	925.349	1682.39	1.38558	0.121671	1.24612e-30	3.15685e-29	2715.86	215.788	1305.87	88.7217	Y	Y	0	burlywood
UMAG_11229	KIS65835	hypothetical protein	9.75798	2.84327	6.30063	1.38067	0.683463	0.00873118	0.0154827	20.9012	12.8009	8.18275	3.6757	Y	Y	1	dark-green
UMAG_00387	KIS71962	probable ADP-ribosylation factor	2020.9	770.888	1395.89	1.3792	0.113395	1.27847e-34	4.1089e-33	2485.66	143.554	1201.54	82.9929	Y	Y	0	yellow
UMAG_03114	KIS69143	Acetyltransferase involved in MEL production	62.901	23.1588	43.0299	1.37906	0.264717	4.9614e-08	1.92496e-07	26.4088	4.49893	12.4475	2.9335	Y	Y	2	yellow
UMAG_05270	KIS66270	hypothetical protein	79.579	29.5509	54.565	1.3776	0.236355	1.49365e-09	6.91186e-09	75.8854	7.35019	35.7112	9.31223	Y	Y	0	yellow
UMAG_10226	KIS71376	probable CNB1 - calcineurin B	616.308	233.852	425.08	1.37746	0.154458	1.22974e-19	1.43915e-18	784.682	102.15	377.579	56.3755	Y	Y	0	pink
UMAG_10644	KIS68643	probable CDC10 - septin	1497.67	570.537	1034.1	1.37727	0.130551	1.32739e-26	2.67131e-25	1025.61	121.588	495.774	41.0353	Y	Y	0	pink
UMAG_11561	KIS67140	related to 60S ribosomal protein L28	381.081	144.593	262.837	1.37664	0.157318	5.54467e-19	6.11238e-18	553.363	77.5294	266.113	12.9654	Y	Y	0	yellow
UMAG_15077	KIS69548	hypothetical protein	83.4095	31.0708	57.2402	1.37582	0.235235	1.31194e-09	6.09958e-09	10.5924	1.93114	4.98899	0.643116	N	N	0.5	magenta
UMAG_03538	KIS68450	tryptophan amino transferase (transaminase)	333.036	125.997	229.517	1.37479	0.17174	3.16867e-16	2.73292e-15	155.591	15.2866	74.9892	17.7059	Y	Y	0	pink
UMAG_00538	KIS72118	hypothetical protein	22.5926	7.88532	15.239	1.37474	0.407138	0.000182912	0.00042812	14.228	3.6944	6.4172	1.95442	N	Y	8	magenta
UMAG_03910	KIS67854	probable Calmodulin	827.822	314.971	571.396	1.37334	0.155372	2.49657e-19	2.85954e-18	1235.23	162.164	594.023	57.0645	Y	Y	0	yellow
UMAG_10503	KIS68154	probable cell division control protein CDC3	1953.17	748.07	1350.62	1.37178	0.120027	7.92734e-31	2.03217e-29	1013.1	53.6213	492.203	64.513	Y	Y	0	burlywood
UMAG_05531	KIS66538	related to Phosphoserine aminotransferase	281.293	107.264	194.278	1.3696	0.160885	4.4527e-18	4.48743e-17	148.383	16.0416	71.494	5.12765	Y	Y	0	yellow
UMAG_00940	KIS71023	related to QCR6 - ubiquinol--cytochrome-c reductase 17K protein	811.749	306.633	559.191	1.36796	0.204658	5.98248e-12	3.53034e-11	1366.16	367.953	654.487	53.1095	Y	Y	0	yellow
UMAG_02559	KIS69211	probable YRB1 - ran-specific GTPase-activating protein	1481.98	569.995	1025.99	1.36782	0.11101	1.83682e-35	6.41399e-34	1628.71	141.867	792.43	24.8231	Y	Y	0	yellow
UMAG_10723	KIS66864	hypothetical protein	1271.38	488.241	879.808	1.36763	0.122453	1.54868e-29	3.71914e-28	916.339	65.9623	445.679	45.458	Y	Y	2	yellow
UMAG_11125	KIS67694	probable URA6 - uridine-monophosphate kinase	605.309	231.678	418.494	1.3673	0.143531	4.27883e-22	6.08839e-21	509.41	59.8781	247.386	21.6521	Y	Y	2	yellow
UMAG_01099	KIS71191	probable short chain 3-hydroxyacyl-CoA dehydrogenase	218.697	83.4041	151.051	1.36615	0.170529	3.01973e-16	2.62197e-15	141.708	18.3342	68.418	2.15831	Y	Y	0	burlywood
UMAG_01103	KIS71195	probable ATP synthase delta chain precursor	1600.33	615.264	1107.8	1.36347	0.133784	5.65154e-25	1.02842e-23	2121.71	236.664	1030.2	54.2077	Y	Y	0	yellow
UMAG_10179	KIS70060	hypothetical protein	121.674	46.1599	83.9169	1.35979	0.209036	2.08583e-11	1.16561e-10	230.631	35.2338	111.097	17.0694	Y	Y	0	yellow
UMAG_03971	KIS67920	related to thermoresistant gluconokinase	109.829	41.7374	75.7832	1.35935	0.209267	2.21708e-11	1.23468e-10	97.5538	11.9075	46.8713	6.1736	Y	Y	8	salmon
UMAG_06027	KIS65939	probable HTS1 - histidine--tRNA ligase	827.916	317.611	572.764	1.3586	0.141329	1.25869e-22	1.88221e-21	289.605	32.7406	140.327	13.6009	Y	Y	0	yellow
UMAG_01720	KIS70552	probable phosphomannomutase	701.154	270.188	485.671	1.35748	0.144288	1.35192e-21	1.85817e-20	253.543	26.5248	123.78	17.8823	Y	Y	0.5	beige
UMAG_00094	KIS71653	related to NonF protein	528.544	204.59	366.567	1.35517	0.130674	9.02877e-26	1.72053e-24	501.989	33.6972	245.5	13.3601	Y	Y	0	yellow
UMAG_00304	KIS71876	probable TRP2 - anthranilate synthase component I	482.952	186.471	334.711	1.35395	0.14562	3.88535e-21	5.05017e-20	211.552	24.7243	103.664	13.6995	N	Y	4	cyan
UMAG_04715	KIS66654	hypothetical protein	151.931	57.9293	104.93	1.35317	0.208769	2.42371e-11	1.34281e-10	163.291	26.5402	79.1108	15.2118	Y	Y	0	pink
UMAG_06151	KIS65770	hypothetical protein	102.668	39.0317	70.8496	1.35247	0.211399	4.38337e-11	2.38154e-10	66.3907	6.33969	32.2035	7.36787	Y	Y	0	yellow
UMAG_11190	KIS66074	hypothetical protein	137.329	52.2078	94.7682	1.34882	0.225975	6.41748e-10	3.11238e-09	162.658	23.8462	78.5969	25.2865	Y	Y	4	magenta
UMAG_04194	KIS67693	hypothetical protein	95.2263	36.3363	65.7813	1.34847	0.215996	1.18167e-10	6.12645e-10	147.901	18.9545	72.2716	11.1383	Y	Y	4	light-green
UMAG_11439	KIS72102	related to GLO3 - zinc finger protein	501.766	190.603	346.185	1.34815	0.233421	2.00143e-09	9.1115e-09	210.507	28.7161	102.193	34.9869	Y	Y	2	yellow
UMAG_03798	KIS68218	probable tryptophan--tRNA ligase	468.753	182.283	325.518	1.34713	0.132238	6.2204e-25	1.1256e-23	238.157	22.1929	117.261	7.66631	Y	Y	2	yellow
UMAG_01669	KIS70498	probable VPS4 - vacuolar sorting protein	446.964	173.038	310.001	1.34676	0.156339	1.92309e-18	1.99089e-17	211.048	27.1079	103.816	17.8758	Y	Y	8	cyan
UMAG_10050	KIS71755	probable U6 snRNA-associated Sm-like protein LSm5	90.5579	34.2407	62.3993	1.34607	0.25695	4.28769e-08	1.67971e-07	195.212	51.0424	93.9962	13.7209	Y	Y	6	yellow
UMAG_12017	KIS66834	hypothetical protein	281.038	109.065	195.051	1.34347	0.161667	2.60498e-17	2.46748e-16	202.273	19.8318	99.4713	11.6375	Y	Y	1	dark-green
UMAG_10028	KIS71680	hypothetical protein	109.344	41.9642	75.6541	1.34314	0.213624	8.78921e-11	4.63496e-10	131.127	20.4682	63.6185	8.29033	Y	Y	0	burlywood
UMAG_02583	KIS69235	probable FAT1 - Long-chain fatty acid transporter	387.751	149.404	268.577	1.34296	0.196182	2.0247e-12	1.25163e-11	135.636	21.5798	65.8571	15.4432	Y	Y	0.5	red
UMAG_04164	KIS67660	hypothetical protein	571.323	220.179	395.751	1.34244	0.193116	9.73869e-13	6.27863e-12	165.927	13.6424	81.3764	24.2353	N	Y	8	light-cyan
UMAG_11909	KIS69507	probable RSR1 - GTP-binding protein	60.5841	22.9906	41.7874	1.34222	0.253897	3.42842e-08	1.35875e-07	61.6995	8.62422	29.731	3.87805	Y	Y	4	light-cyan
UMAG_03504	KIS68414	related to Purine-nucleoside phosphorylase	255.929	99.1962	177.563	1.34218	0.167656	3.27355e-16	2.81586e-15	173.351	24.0406	85.1815	11.3852	Y	Y	0.5	beige
UMAG_10119	KIS72049	probable IPL1 - ser/thr protein kinase	102.16	39.2507	70.7051	1.34215	0.208539	3.39868e-11	1.85906e-10	47.9496	6.56559	23.3651	2.12141	Y	Y	0	yellow
UMAG_00923	KIS71005	related to DSK2 - ubiquitin-like protein	1038.07	405.499	721.785	1.34133	0.129776	1.3273e-25	2.48533e-24	550.477	49.015	272.151	33.8338	Y	Y	0	yellow
UMAG_00297	KIS71869	related to Peroxisome assembly protein 12	152.81	58.5786	105.694	1.33644	0.225792	8.80772e-10	4.20531e-09	76.5462	19.5641	37.3593	8.8301	Y	Y	0.5	beige
UMAG_11619	KIS72277	probable ribosomal protein L22	570.015	221.52	395.768	1.33449	0.181012	4.55276e-14	3.34594e-13	1013.68	219.651	499.409	62.1697	Y	Y	0	yellow
UMAG_00309	KIS71881	hypothetical protein	267.519	75.1854	171.352	1.33353	0.783201	0.01443	0.0244666	140.716	76.0178	49.5608	42.017	N	N	1	red
UMAG_11353	KIS71941	probable beta-succinyl CoA synthetase precursor	1856.96	731.899	1294.43	1.33316	0.108429	2.63592e-35	9.05746e-34	973.98	37.4589	485.693	15.4304	Y	Y	0	yellow
UMAG_10457	KIS70805	related to protein involved in intramitochondrial protein sorting	51.6075	19.3855	35.4965	1.33144	0.305106	3.40803e-06	1.05266e-05	63.1855	4.31852	30.1798	13.4297	Y	Y	2	yellow
UMAG_00153	KIS71715	hypothetical protein	310.723	121.058	215.89	1.33077	0.182209	7.69061e-14	5.47755e-13	578.84	103.408	286.157	33.0215	Y	Y	0	pink
UMAG_04270	KIS67777	probable DPS1 - aspartyl-tRNA synthetase	1534.12	603.896	1069.01	1.32727	0.14318	5.11861e-21	6.60005e-20	611.544	89.2549	303.52	18.8286	Y	Y	2	yellow
UMAG_02889	KIS68903	related to SEC9 - protein transport protein	814.992	320.222	567.607	1.32542	0.138346	1.92393e-22	2.8119e-21	467.265	67.5961	232.421	11.9508	Y	Y	2	yellow
UMAG_11078	KIS68332	hypothetical protein	160.445	62.0817	111.263	1.32459	0.232159	3.10446e-09	1.385e-08	166.472	10.111	81.0339	26.9146	Y	Y	4	cyan
UMAG_04135	KIS67632	hypothetical protein	15.4024	5.24004	10.3212	1.32384	0.514414	0.00243331	0.00479682	17.0594	7.6208	7.27453	2.77329	Y	Y	6	#N/A
UMAG_05053	KIS67187	hypothetical protein	155.551	60.9164	108.233	1.32294	0.180057	5.77042e-14	4.20258e-13	159.933	19.6814	79.7329	9.39662	Y	Y	2	yellow
UMAG_00216	KIS71784	probable RFC2 - DNA replication factor C	198.735	78.0547	138.395	1.32084	0.172081	4.69983e-15	3.74826e-14	115.866	14.6112	57.6532	8.90045	Y	Y	0	yellow
UMAG_00637	KIS72222	related to triacylglycerol lipase	468.813	182.795	325.804	1.3201	0.211458	1.16527e-10	6.04632e-10	333.687	65.4692	164.328	38.3639	Y	Y	0	dark-green
UMAG_10618	KIS70997	hypothetical protein	31.841	11.96	21.9005	1.31954	0.325727	1.4177e-05	3.98537e-05	26.8929	3.11935	12.8135	1.64019	Y	Y	8	magenta
UMAG_04241	KIS67743	hypothetical protein	385.928	150.498	268.213	1.31942	0.210814	1.06001e-10	5.54469e-10	263.154	23.6302	129.863	41.5568	Y	Y	2	magenta
UMAG_11305	KIS71303	hypothetical protein	15.157	5.23484	10.1959	1.31759	0.49372	0.00190658	0.00383094	11.7861	4.64821	5.28831	1.21896	N	N	12	beige
UMAG_10248	KIS70646	hypothetical protein	83.4188	32.5635	57.9911	1.31697	0.215262	2.72161e-10	1.36928e-09	42.648	3.54261	21.0477	0.99198	Y	Y	1	light-cyan
UMAG_11633	KIS72420	probable aspartyl aminopeptidase	679.491	267.559	473.525	1.31696	0.178041	3.82327e-14	2.84871e-13	300.575	40.9971	149.879	30.8753	Y	Y	0	burlywood
UMAG_12236	KIS68505	probable NADP( )-dependent dehydrogenase acting on 3-hydroxy acids	354.256	140.457	247.357	1.3165	0.146255	6.2787e-20	7.45596e-19	291.974	22.0238	146.517	14.8291	Y	Y	0	pink
UMAG_10864	KIS66221	related to GNA1 - essential acetyltransferase	21.2883	7.70068	14.4945	1.31383	0.42705	0.000540075	0.00118187	26.8361	7.16738	12.1076	4.63269	Y	Y	0.5	red
UMAG_11436	KIS72097	probable electron transfer flavoprotein beta chain	505.118	200.433	352.775	1.31249	0.154944	6.70759e-18	6.64586e-17	410.977	53.5175	206.616	15.5552	Y	Y	0	burlywood
UMAG_00131	KIS71691	related to NADPH quinone oxidoreductase homolog PIG3	185.281	73.0633	129.172	1.31229	0.187234	6.7751e-13	4.43436e-12	98.0294	15.7271	49.026	3.8101	Y	Y	0	beige
UMAG_06408	KIS65708	related to IVY1 - phospholipid-binding protein	175.107	69.2036	122.155	1.3114	0.172389	8.13982e-15	6.38921e-14	66.3644	6.59993	33.3858	5.00948	Y	Y	0.5	light-cyan
UMAG_10082	KIS69724	probable dynactin Arp1 p25 subunit RO12	50.6012	19.3489	34.9751	1.30941	0.294813	2.47739e-06	7.79159e-06	54.4661	13.2414	26.3497	6.37762	Y	Y	0.5	beige
UMAG_00311	KIS71883	probable asparagine synthase	1352.56	537.77	945.164	1.30918	0.121627	6.83885e-28	1.48751e-26	477.606	50.0115	239.918	5.67765	Y	Y	0	yellow
UMAG_11808	KIS65934	related to LCB5 - sphingolipid long chain base kinase	525.299	205.936	365.617	1.30724	0.222402	1.14224e-09	5.36644e-09	172.3	54.0822	85.5709	18.2003	Y	Y	2	cyan
UMAG_04948	KIS67080	probable GRX1 - glutaredoxin	345.131	136.578	240.854	1.30474	0.194865	5.98409e-12	3.53034e-11	750.483	142.358	375.766	59.2338	Y	Y	0	yellow
UMAG_10387	KIS68591	probable 1	2875.37	1151.69	2013.53	1.30436	0.131468	9.26949e-24	1.50077e-22	3112.61	153.549	1573.99	180.035	Y	Y	12	dark-green
UMAG_11999	KIS66698	probable Chromatin assembly factor 1 subunit c	454.942	181.969	318.455	1.30184	0.149443	8.58009e-19	9.36274e-18	234.938	18.5009	119.442	19.9872	Y	Y	0	yellow
UMAG_10435	KIS67802	probable ran GTPase activating protein 1	422.537	169.033	295.785	1.30048	0.155208	1.51424e-17	1.46657e-16	236.292	31.3363	119.774	15.6927	Y	Y	0	yellow
UMAG_02300	KIS69778	probable alpha-amylase	490.348	195.265	342.806	1.29966	0.178487	9.36895e-14	6.61458e-13	204.771	32.9861	103.35	21.9238	Y	Y	0	pink
UMAG_01883	KIS70728	hypothetical protein	285.145	113.645	199.395	1.29916	0.182438	3.01267e-13	2.02727e-12	274.132	22.7319	138.172	31.0798	Y	Y	2	light-green
UMAG_04611	KIS67516	probable negative regulator sulfur controller-3	779.872	312.881	546.377	1.29877	0.146928	2.75096e-19	3.13425e-18	1097.53	149.872	557.954	41.0589	Y	Y	0	beige
UMAG_10839	KIS68753	probable FMP43 - protein found in mitochondrial proteome	118.824	47.1985	83.0111	1.29856	0.19746	1.39861e-11	7.99559e-11	204.708	18.156	103.264	13.4172	Y	Y	0	yellow
UMAG_01515	KIS70345	related to ECM4 - protein involved in cell wall biogenesis and architecture	494.905	198.982	346.943	1.29841	0.139244	3.17643e-21	4.2135e-20	349.745	12.089	177.441	18.4147	Y	Y	12	beige
UMAG_10370	KIS69077	related to YJU3 û monoglyceride lipase	535.228	215.36	375.294	1.298	0.135118	2.15418e-22	3.13423e-21	355.731	30.7062	181.204	8.2142	Y	Y	0.5	red
UMAG_01787	KIS70622	related to homocysteine S-methyltransferase	340.441	135.545	237.993	1.29708	0.191168	3.27267e-12	1.98325e-11	169.981	17.5959	85.3287	20.1281	Y	Y	0	yellow
UMAG_02469	KIS69957	related to pre-mRNA splicing factor	300.298	120.131	210.214	1.29648	0.171954	1.3456e-14	1.0373e-13	237.877	38.3423	120.084	10.2489	Y	Y	0	yellow
UMAG_05301	KIS66301	hypothetical protein	29.249	10.9496	20.0993	1.2957	0.367344	0.000115252	0.000279478	25.8278	4.63881	12.3623	5.0623	Y	Y	4	cyan
UMAG_05829	KIS66088	probable mago nashi protein	82.1097	32.0551	57.0824	1.29493	0.255993	1.21317e-07	4.45795e-07	125.953	21.7884	62.9406	20.2821	Y	Y	0	burlywood
UMAG_00334	KIS71905	probable peroxisomal acyl-coenzyme A thioester hydrolase 1	250.767	100.615	175.691	1.29331	0.163415	7.28099e-16	6.09264e-15	150.034	5.79279	76.4639	14.1272	Y	Y	4	cyan
UMAG_11373	KIS70809	hypothetical protein	202.106	80.6849	141.396	1.29276	0.18222	3.8238e-13	2.54657e-12	171.214	22.5511	87.1403	19.747	Y	Y	0.5	dark-green
UMAG_10356	KIS66542	probable 20S proteasome beta2 subunit	894.215	361.448	627.832	1.29232	0.128391	2.28131e-24	3.94045e-23	680.588	69.4149	348.914	16.8503	Y	Y	0	pink
UMAG_06004	KIS65915	probable HNT1 - Adenosine 5`-monophosphoramidase	226.662	91.3177	158.99	1.29216	0.151871	5.17691e-18	5.19299e-17	357.648	16.7663	182.254	13.7558	Y	Y	0	pink
UMAG_11760	KIS67449	probable RPT5 - 26S proteasome regulatory subunit	959.977	389.111	674.544	1.2918	0.111324	1.14637e-31	3.07284e-30	507.194	28.1814	260.447	15.2091	Y	Y	0	yellow
UMAG_05640	KIS66852	probable RET3 - coatomer complex zeta chain	279.508	112.457	195.982	1.28905	0.163036	7.78438e-16	6.48866e-15	296.915	23.7462	151.976	27.8315	Y	Y	8	yellow
UMAG_02981	KIS69002	hypothetical protein	539.387	217.009	378.198	1.28763	0.171999	2.03918e-14	1.55343e-13	538.045	101.546	275.161	16.255	Y	Y	0	yellow
UMAG_06182	KIS65802	mitochondrial p32 family protein	1970.19	801.993	1386.09	1.28598	0.123029	5.16104e-26	1.00121e-24	1604.48	100.044	825.136	51.8523	Y	Y	0	yellow
UMAG_00604	KIS72186	related to SGT1 - subunit of SCF ubiquitin ligase complex	131.952	53.0795	92.5158	1.28539	0.186903	1.78362e-12	1.1079e-11	136.097	12.2637	69.2144	5.38294	Y	Y	2	light-green
UMAG_02437	KIS69923	probable NADH2 dehydrogenase (ubiquinone)	748.739	301.068	524.904	1.28534	0.181803	4.42169e-13	2.93567e-12	1271.62	166.167	645.477	144.549	Y	Y	0	yellow
UMAG_06395	KIS65694	related to NOT3 - general negative regulator of transcription	738.627	300.075	519.351	1.28488	0.128419	4.23778e-24	7.05569e-23	225.037	23.1496	115.756	9.43573	Y	Y	0	burlywood
UMAG_10875	KIS70604	hypothetical protein	791.472	319.014	555.243	1.28422	0.173969	4.50307e-14	3.32076e-13	717.302	127.511	366.382	56.2132	Y	Y	0.5	dark-green
UMAG_01121	KIS71216	probable RPN8 - 26S proteasome regulatory subunit	717.231	289.091	503.161	1.2835	0.175149	6.75383e-14	4.88028e-13	484.939	89.1744	248.322	39.8829	Y	Y	0	yellow
UMAG_11494	KIS68906	related to SHP1 - potential regulatory subunit for Glc7p	1009.44	410.902	710.173	1.2825	0.127559	2.58077e-24	4.43398e-23	495.318	56.9042	254.79	13.3464	Y	Y	0	pink
UMAG_11741	KIS67944	related to GCY1 - galactose-induced protein of aldo/keto reductase family	3882.86	1578.07	2730.46	1.28244	0.134888	5.54624e-22	7.83998e-21	2666.61	109.077	1368.75	153.172	Y	Y	2	yellow
UMAG_01654	KIS70479	hypothetical protein	650.011	262.521	456.266	1.28147	0.174308	5.6212e-14	4.10316e-13	320.23	18.6123	163.549	37.9602	Y	Y	4	magenta
UMAG_06448	KIS65745	probable 40S ribosomal protein S25	1323.45	536.029	929.739	1.28132	0.160027	3.41678e-16	2.9235e-15	2899.8	493.475	1488.95	133.635	Y	Y	0	yellow
UMAG_10443	KIS68357	hypothetical protein	11.8124	3.83138	7.82191	1.28021	0.633187	0.00973235	0.0170938	23.4059	16.8049	9.7097	5.39349	Y	Y	4	light-cyan
UMAG_01824	KIS70662	hypothetical protein	136.57	55.0348	95.8023	1.27886	0.191009	6.37159e-12	3.75209e-11	99.3739	13.8972	50.961	5.84788	Y	Y	0	pink
UMAG_04599	KIS67503	related to PRP38A - pre-mRNA-splicing factor	306.467	124.368	215.417	1.27799	0.160596	5.15739e-16	4.34377e-15	187.533	15.8578	96.6982	16.1891	Y	Y	12	beige
UMAG_02126	KIS69591	related to RMD1 - cytoplasmic protein required for sporulation	244.382	99.0238	171.703	1.27444	0.176773	1.67459e-13	1.15084e-12	112.894	19.8604	58.1532	8.55398	Y	Y	2	light-green
UMAG_00672	KIS72262	probable urate oxidase (uricase)	970.059	393.283	681.671	1.27421	0.180634	5.07903e-13	3.35486e-12	662.911	85.0056	338.721	68.9803	Y	Y	0	beige
UMAG_04726	KIS66665	probable ADE1 - phosphoribosylamidoimidazole-succinocarboxamide synthase	357.912	146.414	252.163	1.27405	0.131224	8.2901e-23	1.24544e-21	254.113	16.4402	131.602	8.75469	Y	Y	2	yellow
UMAG_04265	KIS67770	related to Beclin 1	120.652	48.592	84.6221	1.27343	0.201047	7.21776e-11	3.84392e-10	50.4251	6.84	25.8767	5.056	N	Y	8	light-cyan
UMAG_00984	KIS71073	hypothetical protein	270.104	109.685	189.894	1.2733	0.174715	9.26099e-14	6.55269e-13	152.037	10.3361	78.3861	17.1152	Y	Y	12	dark-green
UMAG_03210	KIS68636	probable CKS1 - cyclin-dependent kinases regulatory subunit	329.536	134.738	232.137	1.27142	0.14922	4.72541e-18	4.75485e-17	576.204	44.8152	298.408	30.6093	Y	Y	0	yellow
UMAG_10459	KIS72127	probable RPT3 - 26S proteasome regulatory subunit	1029.58	422.562	726.069	1.27139	0.121627	4.25168e-26	8.29785e-25	554.803	56.6619	288.853	26.821	Y	Y	0	yellow
UMAG_04136	KIS67633	related to serine/threonine protein kinase	2178.92	891.291	1535.11	1.27066	0.14616	1.03674e-18	1.11996e-17	613.917	84.0586	317.746	43.5537	Y	Y	0.5	red
UMAG_02412	KIS69897	related to glycine-rich RNA-binding protein (isoform A)	1713.8	706.104	1209.95	1.27037	0.100375	3.08574e-37	1.23049e-35	1917.46	121.228	1000.66	36.6553	Y	Y	0	burlywood
UMAG_10538	KIS67356	hypothetical protein	183.563	74.811	129.187	1.26999	0.165409	4.92511e-15	3.91825e-14	114.317	9.76957	59.2084	7.21898	Y	Y	0	beige
UMAG_10197	KIS70118	probable 40S ribosomal protein S23	1061.5	431.492	746.495	1.26689	0.189292	6.39231e-12	3.76087e-11	1652.31	320.801	848.901	161.514	Y	Y	0	yellow
UMAG_10231	KIS71392	probable 26S proteasome non-atpase regulatory subunit 8	841.92	344.857	593.388	1.26374	0.143656	2.99614e-19	3.38375e-18	714.422	102.216	370.322	19.1859	Y	Y	0	burlywood
UMAG_10502	KIS68152	probable aminopeptidase P	924.24	382.329	653.285	1.26207	0.122808	3.29982e-25	6.05593e-24	337.857	27.2588	177.297	16.9902	Y	Y	0	yellow
UMAG_01072	KIS71163	probable GOR1 û glyoxylate reductase	175.023	71.7447	123.384	1.26132	0.174459	1.45598e-13	1.00495e-12	118.448	9.79366	61.7313	6.32165	Y	Y	8	cyan
UMAG_00797	KIS72395	probable adenosine kinase	920.998	381.492	651.245	1.26078	0.111628	4.28212e-30	1.04782e-28	596.369	12.8076	312.722	19.3739	Y	Y	0	yellow
UMAG_00256	KIS71826	related to 3-oxoacyl-[acyl-carrier protein] reductase	397.513	163.947	280.73	1.25972	0.144965	1.09683e-18	1.177e-17	331.579	37.7326	173.018	14.8965	Y	Y	8	cyan
UMAG_04487	KIS67386	hypothetical protein	391.638	160.564	276.101	1.25854	0.175835	2.46426e-13	1.67217e-12	81.4692	13.4108	42.4672	7.27617	N	Y	2	light-green
UMAG_02158	KIS69623	probable DUG1 - Cys-Gly metallo-di-peptidase	3787.9	1566.69	2677.29	1.25384	0.149762	1.69936e-17	1.63849e-16	1773.99	194.823	925.958	98.665	Y	Y	0	burlywood
UMAG_11323	KIS71500	related to 2-hydroxyacid dehydrogenase	595.56	246.836	421.198	1.25299	0.143293	6.75828e-19	7.41231e-18	351.187	30.9732	184.164	20.9285	Y	Y	0.5	yellow
UMAG_01651	KIS70476	probable GTP-binding protein Rab11	747.821	309.232	528.527	1.2513	0.160929	2.26708e-15	1.84218e-14	781.339	122.47	409.895	42.4013	Y	Y	1	burlywood
UMAG_01757	KIS70591	hypothetical protein	3.07419	0.464357	1.76927	1.2513	1.29422	0.047492	0.0719003	5.38334	4.61756	1.17375	0.870073	N	N	4	#N/A
UMAG_02466	KIS69954	hypothetical protein	6.16542	1.67351	3.91947	1.25096	0.856025	0.0281486	0.0448988	6.62762	4.12047	2.50839	2.54575	N	N	2	magenta
UMAG_00160	KIS71722	probable SEC17 - transport vesicle fusion protein	1153.77	481.009	817.388	1.25051	0.113844	1.39797e-28	3.13573e-27	894.991	39.9569	472.345	45.8736	Y	Y	1	dark-green
UMAG_05403	KIS66410	probable proliferating cell nuclear antigen	274.993	113.753	194.373	1.2504	0.155399	2.65844e-16	2.32074e-15	212.73	21.3072	112.006	18.5229	Y	Y	0	yellow
UMAG_01815	KIS70651	related to carbonyl reductase	109.087	44.7415	76.9144	1.24896	0.203846	2.75755e-10	1.38628e-09	86.6416	11.0776	44.9297	4.23826	Y	Y	4	magenta
UMAG_02097	KIS69560	related to enoyl-CoA hydratase	39.2736	15.6067	27.4401	1.24888	0.310956	1.74764e-05	4.85582e-05	27.5836	4.31315	14.1101	4.20601	Y	Y	0	burlywood
UMAG_11818	KIS70305	probable SDS22 - protein phosphatase 1	296.588	122.039	209.314	1.24795	0.187648	8.91262e-12	5.19166e-11	158.73	23.937	83.2341	22.5752	Y	Y	0	yellow
UMAG_11086	KIS68398	related to KES1 - Member of an oxysterol-binding protein family	3614.24	1501.64	2557.94	1.24748	0.14838	1.27505e-17	1.24611e-16	2105.92	249.259	1112.41	170.9	Y	Y	8	cyan
UMAG_10363	KIS69051	hypothetical protein	327.069	136.349	231.709	1.2474	0.132038	1.06676e-21	1.47565e-20	321.689	14.4651	169.388	2.79926	Y	Y	0	yellow
UMAG_01712	KIS70544	related to AIM2 - cytoplasmic protein involved in mitochondrial function or organization	1056.72	440.404	748.564	1.24733	0.133967	3.86379e-21	5.03228e-20	940.257	69.3194	494.248	48.6241	Y	Y	1	burlywood
UMAG_00920	KIS71002	probable RFC5 - DNA replication factor C	99.352	40.9613	70.1567	1.24414	0.198453	1.13295e-10	5.8928e-10	62.7987	2.47571	32.8295	3.22534	Y	Y	0	yellow
UMAG_12165	KIS70663	hypothetical protein	86.7765	35.5041	61.1403	1.24352	0.2314	2.34273e-08	9.50631e-08	75.7827	10.7119	39.3938	8.97484	Y	Y	0	yellow
UMAG_04428	KIS67328	related to YFH1 - mitochondrial matrix iron chaperone	101.366	41.669	71.5176	1.24347	0.211697	1.31245e-09	6.09958e-09	103.366	15.2449	53.8858	6.31554	Y	Y	0	yellow
UMAG_04566	KIS67468	hypothetical protein	65.201	26.3533	45.7771	1.24331	0.269794	1.21494e-06	4.00229e-06	129.141	26.9908	66.0804	18.4767	Y	Y	0.5	light-cyan
UMAG_06045	KIS65956	probable urease	513.081	212.96	363.02	1.24285	0.171393	1.2661e-13	8.79464e-13	132.131	5.76642	69.5076	15.9791	Y	Y	0	yellow
UMAG_06070	KIS65981	probable IPP1 - inorganic pyrophosphatase	3527.47	1479.74	2503.6	1.24162	0.114638	7.51889e-28	1.62993e-26	2402.76	112.347	1273.09	84.5972	Y	Y	0	yellow
UMAG_03755	KIS68175	hypothetical protein	460.716	191.892	326.304	1.24144	0.155111	3.75238e-16	3.20217e-15	394.991	28.1501	209.953	39.3499	Y	Y	2	yellow
UMAG_10801	KIS70339	hypothetical protein	515.079	215.544	365.312	1.23886	0.140114	2.94261e-19	3.32912e-18	281.16	27.4055	149.466	22.1728	Y	Y	1	light-cyan
UMAG_11054	KIS67979	probable FPR1 - peptidyl-prolyl cis-trans isomerase	1767.48	739.172	1253.33	1.23757	0.15052	6.04571e-17	5.58731e-16	3470.76	347.796	1833.73	232.81	Y	Y	0	yellow
UMAG_11497	KIS68911	probable UDP-N-acetylglucosamine pyrophosphorylase	2030.1	852.059	1441.08	1.23656	0.135456	2.1338e-20	2.62559e-19	909.899	58.9263	481.434	47.0393	Y	Y	2	green-yellow
UMAG_11134	KIS70456	related to Yippee protein	156.76	63.9856	110.373	1.23478	0.254259	3.57501e-07	1.24701e-06	315.596	53.3618	164.654	61.4188	Y	Y	0.5	light-cyan
UMAG_10308	KIS69330	related to ECM40 - acetylornithine acetyltransferase	502.973	210.651	356.812	1.23433	0.154471	4.14159e-16	3.51573e-15	220.786	24.8297	117.157	18.8461	Y	Y	0	yellow
UMAG_02245	KIS69720	probable SEC13 - protein transport protein	802.095	336.643	569.369	1.23401	0.142364	1.26556e-18	1.33369e-17	493.144	53.3193	261.159	29.4495	Y	Y	2	light-green
UMAG_05703	KIS66919	related to D-amino-acid oxidase	236.985	99.0209	168.003	1.23383	0.163249	1.29642e-14	1.00178e-13	145.299	18.1803	77.103	11.7038	Y	Y	0.5	dark-green
UMAG_11182	KIS66623	hypothetical protein	58.7693	23.926	41.3477	1.23381	0.266167	1.09212e-06	3.61428e-06	80.8281	16.1949	41.9039	6.49916	Y	Y	0	pink
UMAG_12006	KIS66823	related to NAD-dependent deacetylase Sirtuin 5	97.2844	40.1244	68.7044	1.23285	0.222119	8.88326e-09	3.76795e-08	74.1488	10.7261	38.8045	7.14577	Y	Y	4	magenta
UMAG_02189	KIS69657	probable 3-hydroxyisobutyrate dehydrogenase	276.481	116.223	196.352	1.23212	0.14147	9.73467e-19	1.05513e-17	168.751	9.54255	89.9534	6.7754	Y	Y	0	burlywood
UMAG_04987	KIS67120	hypothetical protein	121.714	49.9296	85.8218	1.23	0.243618	1.36351e-07	4.97643e-07	250.805	37.2453	131.628	45.9272	Y	Y	4	magenta
UMAG_02236	KIS69708	hypothetical protein	42.079	16.9857	29.5324	1.22835	0.301689	1.42522e-05	4.00475e-05	33.1105	7.41244	16.8018	2.8071	Y	Y	0.5	light-cyan
UMAG_03278	KIS68711	probable VPS74 - protein involved in protein-vacuolar targeting	519.894	216.74	368.317	1.22825	0.194337	8.05559e-11	4.25852e-10	265.187	41.5946	140.771	35.0496	Y	Y	2	yellow
UMAG_01894	KIS70739	hypothetical protein	272.355	114.592	193.474	1.2279	0.156946	1.60719e-15	1.31424e-14	220.928	15.7559	118.097	16.3425	Y	Y	1	dark-green
UMAG_04872	KIS66812	probable ARG1 - argininosuccinate synthetase	1949.8	819.149	1384.47	1.22728	0.13981	3.60111e-19	4.03874e-18	1021.85	136.679	543.358	23.1956	Y	Y	2	yellow
UMAG_04776	KIS66712	probable PRE10 - 20S proteasome subunit C1 (alpha7)	718.16	302.687	510.424	1.22693	0.149269	6.38626e-17	5.86012e-16	640.897	33.6485	341.97	56.8178	Y	Y	0	yellow
UMAG_01789	KIS70624	related to ERG28 - involved in synthesis of ergosterol	119.846	49.875	84.8603	1.22599	0.212141	2.32949e-09	1.05308e-08	191.09	26.643	101.325	18.8376	Y	Y	0	pink
UMAG_01144	KIS71241	related to POP4 - protein involved in processing of tRNAs and rRNAs	36.7039	14.4435	25.5737	1.22505	0.375499	0.000315099	0.000714475	22.7674	7.94332	11.0816	4.59609	Y	Y	1	green-yellow
UMAG_01853	KIS70695	related to antibiotic biosynthesis protein	94.459	39.1605	66.8098	1.22464	0.232744	4.40056e-08	1.7208e-07	67.5885	11.9944	35.5821	7.39714	Y	Y	0	burlywood
UMAG_12230	KIS68358	hypothetical protein	55.452	22.7361	39.0941	1.22306	0.267289	1.47624e-06	4.81399e-06	36.8712	5.90975	18.9769	4.26235	Y	Y	12	#N/A
UMAG_11107	KIS68287	hypothetical protein	397.928	168.235	283.081	1.22233	0.152196	3.02427e-16	2.62239e-15	284.889	16.0913	152.246	22.6783	Y	Y	4	light-cyan
UMAG_02039	KIS69500	hypothetical protein	124.75	52.1415	88.4458	1.2221	0.201862	4.46058e-10	2.19965e-09	96.5708	13.3251	51.4032	7.78144	Y	Y	0	beige
UMAG_01304	KIS71406	related to 8-oxoguanine DNA-glycosylase	84.4696	34.773	59.6213	1.22194	0.250963	3.49099e-07	1.21968e-06	33.1676	5.69251	17.4158	5.65426	Y	Y	6	green
UMAG_11758	KIS67442	hypothetical protein	288.745	122.095	205.42	1.22117	0.153081	4.75874e-16	4.01324e-15	279.999	34.1059	149.821	6.60513	Y	Y	0	yellow
UMAG_03847	KIS68266	nitrate reductase	633.713	230.95	432.331	1.21988	0.519666	0.00463986	0.00868293	144.338	21.1119	66.4883	46.831	Y	Y	0.5	red
UMAG_05912	KIS66173	probable DNA repair endonuclease rad2	164.801	69.426	117.113	1.21931	0.171174	3.4282e-13	2.3021e-12	98.4967	5.91583	52.5349	8.97539	Y	Y	0	yellow
UMAG_10131	KIS69841	related to phosphatidylserine decarboxylase proenzyme 2 precursor	397.018	167.665	282.342	1.21853	0.165815	6.35576e-14	4.60811e-13	221.597	32.0656	118.785	21.284	Y	Y	4	magenta
UMAG_03194	KIS68618	hypothetical protein	176.154	74.147	125.15	1.21768	0.17937	3.65082e-12	2.20208e-11	92.951	10.9444	49.7688	9.55005	Y	Y	1	dark-green
UMAG_11378	KIS70825	probable Cyanate hydratase	194.258	81.9823	138.12	1.21756	0.177426	2.14845e-12	1.32433e-11	266.335	31.0019	142.349	17.5356	Y	Y	0.5	dark-green
UMAG_10757	KIS66499	hypothetical protein	261.304	110.321	185.813	1.21756	0.172243	4.93507e-13	3.26645e-12	355.095	61.8588	189.789	19.5722	Y	Y	0	yellow
UMAG_03282	KIS68715	related to MAK32 protein	64.8787	26.5052	45.692	1.21736	0.287516	7.01284e-06	2.06486e-05	36.7301	11.7124	19.1288	2.7753	N	Y	8	magenta
UMAG_04588	KIS67490	probable ubiquitin/ribosomal protein S27a fusion protein	5724.28	2434.44	4079.36	1.21522	0.142973	6.02916e-18	6.01984e-17	8009.87	1243.76	4314.53	165.777	Y	Y	0	yellow
UMAG_02014	KIS70869	hypothetical protein	217.115	91.5654	154.34	1.21467	0.185234	1.73675e-11	9.79858e-11	110.495	13.9792	59.2132	11.7284	Y	Y	0.5	light-cyan
UMAG_10953	KIS68700	probable TRX2 - thioredoxin II	1390.48	586.642	988.559	1.21361	0.187582	3.05851e-11	1.67867e-10	2937.03	640.816	1567.67	200.601	Y	Y	0	yellow
UMAG_05239	KIS70170	related to NAD-dependent deacetylase sirtuin type 4	90.1229	37.8317	63.9773	1.21256	0.212462	3.69319e-09	1.62965e-08	50.3305	7.10659	26.9379	1.73185	Y	Y	8	beige
UMAG_00059	KIS71617	related to 3-mercaptopyruvate sulfurtransferase	251.08	106.097	178.589	1.21183	0.184583	1.65175e-11	9.32721e-11	172.424	9.87644	92.6524	22.7839	Y	Y	0	pink
UMAG_06105	KIS66014	probable PDB1 - pyruvate dehydrogenase (lipoamide) beta chain precursor	2316.18	993.989	1655.09	1.21115	0.103232	2.79656e-32	7.82068e-31	1263.14	42.0302	685.395	38.6192	Y	Y	0	yellow
UMAG_11496	KIS68908	related to Tyrosyl-tRNA synthetase	787.53	336.166	561.848	1.21052	0.138904	8.63709e-19	9.40217e-18	417.201	25.4892	225.001	27.2525	Y	Y	0	yellow
UMAG_01576	KIS70409	hypothetical protein	68.0632	28.0473	48.0552	1.21003	0.269952	2.31897e-06	7.33262e-06	41.0622	10.3289	21.505	6.17806	Y	Y	8	cyan
UMAG_11265	KIS71124	probable ARP3 - actin related protein	589.161	251.575	420.368	1.20988	0.140533	2.37337e-18	2.44529e-17	301.038	38.6942	163.457	12.5807	Y	Y	0	yellow
UMAG_05354	KIS66356	hypothetical protein	172.517	73.3903	122.954	1.20817	0.165186	8.51129e-14	6.04208e-13	165.998	11.79	89.6195	9.92967	Y	Y	1	light-cyan
UMAG_00045	KIS71602	related to quinone reductase	456.482	194.983	325.732	1.20792	0.148948	1.60884e-16	1.42177e-15	294.883	28.7355	159.085	17.2614	Y	Y	0.5	dark-green
UMAG_04761	KIS66699	related to SET protein (Protein phosphatase 2A inhibitor)	1420.04	607.144	1013.59	1.20782	0.142705	8.29333e-18	8.16691e-17	1232.69	133.135	666.356	67.2086	Y	Y	0	yellow
UMAG_01257	KIS71357	related to ANT1 - peroxisomal ATP carrier	213.551	90.2823	151.916	1.20696	0.199442	4.5476e-10	2.23914e-09	144.823	16.0398	77.8475	19.6032	Y	Y	0	beige
UMAG_11379	KIS70827	hypothetical protein	189.152	80.0516	134.602	1.20661	0.189641	6.43023e-11	3.44153e-10	55.794	7.65205	30.1235	6.57707	Y	Y	8	cyan
UMAG_00109	KIS71668	probable DAK2 - dihydroxyacetone kinase	906.149	385.021	645.585	1.20654	0.178424	4.33233e-12	2.59378e-11	329.681	59.3888	177.12	36.9874	Y	Y	1	dark-green
UMAG_05526	KIS66532	hypothetical protein	125.247	52.7849	89.0158	1.20584	0.21152	3.8299e-09	1.68767e-08	76.6584	12.6466	41.1152	8.68443	Y	Y	2	yellow
UMAG_10760	KIS70195	hypothetical protein	245.173	104.48	174.826	1.20373	0.175367	2.15121e-12	1.32477e-11	155.132	20.7803	83.655	11.9469	Y	Y	12	beige
UMAG_11659	KIS70284	probable PCS60 - AMP-binding protein	205.911	87.6531	146.782	1.20316	0.177488	3.94912e-12	2.37535e-11	87.9315	11.6635	47.4813	8.1578	Y	Y	0	yellow
UMAG_10918	KIS66966	Brh2-interacting protein Dss1	143.942	60.8083	102.375	1.20219	0.215402	7.6192e-09	3.24456e-08	268.435	53.1316	143.724	26.1129	Y	Y	0	yellow
UMAG_01929	KIS70777	hypothetical protein	35.6933	14.6201	25.1567	1.20212	0.312864	3.82907e-05	0.000100552	55.0916	10.6909	28.6688	5.82222	Y	Y	0	burlywood
UMAG_10794	KIS71091	related to GGA2 - Arf-binding protein	263.129	111.615	187.372	1.20113	0.198172	4.32156e-10	2.13598e-09	109.769	11.6203	59.1955	16.2081	Y	Y	0	yellow
UMAG_05644	KIS66858	related to alcohol dehydrogenase	343.767	147.279	245.523	1.19932	0.168668	3.69203e-13	2.4639e-12	216.441	13.6787	116.807	20.3206	Y	Y	0	burlywood
UMAG_02453	KIS69941	probable SOD2 - superoxide dismutase (Mn) precursor	1130.53	488.102	809.316	1.19882	0.122796	5.29697e-23	8.07038e-22	1110.94	49.3286	606.285	49.3357	Y	Y	12	green
UMAG_10841	KIS68756	probable RPL28 - 60S large subunit ribosomal protein L27a.e	760.66	325.355	543.007	1.1987	0.172455	1.17186e-12	7.5027e-12	1150.11	93.449	623.884	136.122	Y	Y	0	yellow
UMAG_11461	KIS69521	probable porphobilinogen synthase	353.75	152.394	253.072	1.19824	0.141822	9.56749e-18	9.4073e-17	236.134	17.6603	128.406	10.1827	Y	Y	0	pink
UMAG_06329	KIS70243	dolichyl-phosphate beta-D-mannosyltransferase	199.706	85.4895	142.598	1.19772	0.17319	1.52329e-12	9.58173e-12	151.656	10.9368	82.4633	14.7442	Y	Y	0	yellow
UMAG_02855	KIS68868	hypothetical protein	660.254	284.725	472.49	1.19649	0.138378	1.73444e-18	1.80717e-17	105.088	15.126	57.2541	4.01686	N	Y	6	magenta
UMAG_04348	KIS67244	probable phenol 2-monooxygenase	107.781	45.7286	76.7549	1.19627	0.206106	2.1422e-09	9.72494e-09	31.5383	3.15844	17.1352	3.63679	Y	Y	0.5	light-cyan
UMAG_11234	KIS65847	related to CGR1 - protein involved in processing of the pre-rRNA for the 60S ribosome subunit	267.679	113.531	190.605	1.19601	0.216384	1.03446e-08	4.36204e-08	540.788	156.291	290.321	30.6438	Y	Y	0	burlywood
UMAG_04539	KIS67441	related to POS5 - Mitochondrial NADH kinase	121.658	51.579	86.6187	1.19526	0.222438	2.47287e-08	1.00092e-07	53.8227	7.4696	28.9732	7.24997	N	N	4	green
UMAG_01708	KIS70540	probable HOM6 - homoserine dehydrogenase	598.147	259.003	428.575	1.19516	0.120913	1.58409e-23	2.50814e-22	351.949	19.924	192.59	4.63492	Y	Y	2	yellow
UMAG_03872	KIS67815	related to VPS25 - vacuolar protein sorting	151.418	64.5481	107.983	1.19362	0.195951	3.70487e-10	1.83962e-09	145.231	12.5103	78.6912	19.0294	Y	Y	0	beige
UMAG_03144	KIS68571	probable clathrin-associated adaptor complex medium chain	204.519	87.3077	145.913	1.19353	0.190019	1.1087e-10	5.77133e-10	106.939	12.3177	58.4539	14.3945	Y	Y	2	light-green
UMAG_05893	KIS66155	related to AYR1 - NADPH-dependent 1-acyl dihydroxyacetone phosphate reductase	244.387	103.823	174.105	1.19339	0.217637	1.32896e-08	5.52449e-08	176.892	36.1575	95.3931	23.1868	Y	Y	4	light-green
UMAG_10079	KIS69714	probable lanosterol synthase	494.828	213.161	353.994	1.19283	0.152977	2.09421e-15	1.70386e-14	154.552	12.4808	84.9285	17.4139	Y	Y	2	yellow
UMAG_05390	KIS66397	related to peroxisomal membrane protein 4	38.7799	15.9709	27.3754	1.19172	0.3092	3.70238e-05	9.73437e-05	40.7076	9.2742	21.4697	4.51594	Y	Y	0.5	light-cyan
UMAG_12213	KIS68611	hypothetical protein	244.289	104.868	174.578	1.19146	0.179963	1.16826e-11	6.70842e-11	298.522	53.0019	162.715	12.3633	Y	Y	0	yellow
UMAG_04167	KIS67663	probable vacuolar ATP synthase subunit D	1034.7	447.591	741.148	1.1905	0.144507	5.72814e-17	5.31663e-16	704.135	20.1828	385.895	65.9386	Y	Y	0	yellow
UMAG_00602	KIS72184	probable SCH9 - serine/threonine protein kinase involved in stress response and nutrient-sensing signaling pathway	406.387	174.791	290.589	1.18932	0.174076	2.74924e-12	1.67548e-11	120.842	11.6636	66.0203	16.7073	Y	Y	0	burlywood
UMAG_01094	KIS71185	related to CKB1 - casein kinase II	243.875	105.677	174.776	1.18741	0.14907	5.48482e-16	4.61354e-15	160.75	8.73803	87.9869	6.07586	Y	Y	0	yellow
UMAG_03451	KIS68356	hypothetical protein	279.559	120.603	200.081	1.18734	0.166713	3.53198e-13	2.36196e-12	174.985	17.9431	95.8542	16.3731	Y	Y	0	beige
UMAG_05900	KIS66162	probable HMT1 - hnRNP arginine N-methyltransferase	530.522	229.464	379.993	1.18679	0.158297	2.14765e-14	1.63414e-13	342.183	32.2075	187.618	28.4383	Y	Y	0	yellow
UMAG_00555	KIS72136	probable glycerol-3-phosphate dehydrogenase (NAD)	342.071	145.737	243.904	1.18556	0.227121	5.70916e-08	2.19662e-07	214.316	47.9625	115.623	30.4638	Y	Y	0	pink
UMAG_02838	KIS68849	hypothetical protein	63.1392	26.8249	44.982	1.18514	0.238609	2.25572e-07	8.01096e-07	44.6826	4.29222	23.9036	2.1287	Y	Y	4	cyan
UMAG_02942	KIS68961	probable MET16 - 3`-phosphoadenylylsulfate reductase	94.7264	39.4641	67.0952	1.18429	0.288402	1.27559e-05	3.61418e-05	69.4821	5.60443	37.1855	18.3007	Y	Y	2	magenta
UMAG_01784	KIS70619	probable GPX2 - glutathione peroxidase	156.1	67.5008	111.801	1.18403	0.176454	6.42747e-12	3.77812e-11	216.182	14.2702	117.549	15.0404	Y	Y	4	magenta
UMAG_03027	KIS69048	related to MON1 - required for fusion of cvt-vesicles and autophagosomes with the vacuole	245.453	106.024	175.738	1.18336	0.173432	2.967e-12	1.80479e-11	62.026	9.17338	34.0208	6.45977	Y	Y	0.5	dark-green
UMAG_10229	KIS71390	probable BET3 - involved in targeting and fusion of ER to golgi transport vesicles	87.4797	37.055	62.2674	1.18287	0.251145	8.02892e-07	2.70563e-06	103.149	26.3715	55.1529	8.26937	Y	Y	0	pink
UMAG_11421	KIS71782	probable methylmalonate-semialdehyde dehydrogenase (acylating)	1071.63	466.153	768.892	1.18087	0.152233	2.90716e-15	2.35047e-14	424.548	42.3031	233.066	34.0965	Y	Y	0	burlywood
UMAG_01935	KIS70784	probable methylglutaconyl-coa hydratase	261.355	113.065	187.21	1.18024	0.179998	1.81139e-11	1.02019e-10	185.039	21.9857	101.25	20.8609	Y	Y	0	burlywood
UMAG_12171	KIS70722	hypothetical protein	109.115	46.9756	78.0451	1.17961	0.194728	4.69777e-10	2.30568e-09	76.9868	6.74587	42.0626	7.83933	Y	Y	0	burlywood
UMAG_02007	KIS70862	probable HAM1 - protein involved in DNA repair	149.301	63.9266	106.614	1.17944	0.224018	4.57141e-08	1.78414e-07	171.652	43.4506	93.32	7.55726	Y	Y	0	yellow
UMAG_02575	KIS69226	related to toxD gene	245.145	106.38	175.762	1.17815	0.170287	1.529e-12	9.60829e-12	150.85	17.748	83.1434	14.3415	Y	Y	1	dark-green
UMAG_11970	KIS67850	hypothetical protein	334.053	143.885	238.969	1.17778	0.204759	2.91583e-09	1.30898e-08	49.5653	12.9836	27.0078	4.68904	N	Y	0	yellow
UMAG_00594	KIS72176	probable dihydrolipoamide acetyltransferase component of pyruvate dehydrogenase complex	1282.26	557.305	919.783	1.17683	0.169522	1.2752e-12	8.09213e-12	569.228	72.6049	312.66	49.6	Y	Y	0	yellow
UMAG_02632	KIS69289	probable nudC protein	176.124	76.5037	126.314	1.17608	0.171903	2.6542e-12	1.62215e-11	200.33	24.9199	110.261	9.82503	Y	Y	0	yellow
UMAG_10504	KIS68155	related to Chromo domain protein MRG15	113.973	49.3027	81.6377	1.17566	0.193754	4.38399e-10	2.16353e-09	77.3405	7.48115	42.047	5.02711	Y	Y	6	salmon
UMAG_10060	KIS69595	related to YIH1	172.046	73.9101	122.978	1.1755	0.217141	2.04004e-08	8.30937e-08	93.1834	25.7504	50.9324	9.16747	Y	Y	0	burlywood
UMAG_11363	KIS70539	related to RIB5 - riboflavin synthase	410.018	178.574	294.296	1.17292	0.171425	2.6395e-12	1.61469e-11	310.668	48.5947	172.029	24.8285	Y	Y	0	pink
UMAG_05652	KIS66867	probable PRE8 - 20S proteasome subunit Y7 (alpha2)	744.562	327.377	535.969	1.17236	0.121918	2.32292e-22	3.36459e-21	659.694	49.7756	366.946	27.8262	Y	Y	0	yellow
UMAG_10605	KIS69459	probable ADH3 - alcohol dehydrogenase III	233.392	101.684	167.538	1.17227	0.171485	2.74467e-12	1.67427e-11	144.212	12.3925	79.6503	15.77	Y	Y	2	magenta
UMAG_11400	KIS69755	probable Thiamin biosynthetic enzyme	11770.1	5185.86	8477.96	1.1712	0.112207	5.6259e-26	1.08487e-24	7715	432.339	4297.46	362.775	Y	Y	8	magenta
UMAG_11692	KIS70424	probable centractin (ro-4)	196.386	85.1427	140.764	1.17076	0.194077	5.43569e-10	2.65215e-09	116.369	17.4744	64.3339	13.8712	Y	Y	2	yellow
UMAG_01696	KIS70526	hypothetical protein	32.3442	13.379	22.8616	1.17054	0.338412	0.000173831	0.000408791	12.6766	2.80687	6.53964	1.77285	N	N	1	red
UMAG_02550	KIS69200	hypothetical protein	93.3784	39.4839	66.4312	1.16922	0.28111	1.03183e-05	2.96117e-05	47.8604	11.3843	25.8743	10.2274	Y	Y	6	green
UMAG_11391	KIS70881	hypothetical protein	112.928	48.9334	80.9309	1.16915	0.200507	1.88036e-09	8.57243e-09	140.634	9.39462	77.1243	16.2353	Y	Y	4	cyan
UMAG_00518	KIS72096	related to TRP4 - anthranilate phosphoribosyltransferase	243.625	107.03	175.328	1.16662	0.150917	3.67973e-15	2.9566e-14	111.16	7.87153	61.7833	5.14063	Y	Y	2	light-green
UMAG_04767	KIS66703	related to GIM4 - Gim complex component (prefoldin subunit 2)	114.451	49.5507	82.0011	1.16405	0.222148	5.38253e-08	2.07713e-07	203.415	40.9185	111.978	19.0167	Y	Y	0	pink
UMAG_02715	KIS69380	probable POT1 - acetyl-CoA C-acyltransferase	1690.26	747.086	1218.67	1.16398	0.124693	3.44072e-21	4.5269e-20	938.06	78.6159	523.185	35.3962	Y	Y	4	dark-green
UMAG_04375	KIS67273	related to hnRNP arginine N-methyltransferase	437.314	192.88	315.097	1.16324	0.14117	5.9104e-17	5.47794e-16	158.088	15.1083	88.4448	7.23956	Y	Y	2	light-green
UMAG_04482	KIS67380	hypothetical protein	35.1817	14.4504	24.816	1.16243	0.375145	0.000598845	0.00129948	17.1421	5.18721	8.89497	4.11627	Y	Y	0.5	dark-green
UMAG_06082	KIS65992	related to NIPSNAP protein	702.745	309.093	505.919	1.16205	0.158382	7.44015e-14	5.31674e-13	510.294	54.8734	286.074	53.0017	Y	Y	0	salmon
UMAG_02185	KIS69652	probable peptidylprolyl isomerase (cyclophilin)-like protein	28.7633	12.0246	20.3939	1.16102	0.337392	0.000188586	0.00043949	38.0872	6.70689	19.682	2.9101	Y	Y	1	beige
UMAG_06134	KIS66044	related to ribosomal protein YmS18	288.002	126.695	207.349	1.1608	0.167073	1.25773e-12	7.99701e-12	218.627	14.7338	121.742	20.6668	Y	Y	0	yellow
UMAG_00975	KIS71062	related to ATP20 - subunit G of mitochondrial F1F0-ATP Synthase	719.992	319.584	519.788	1.15832	0.124294	4.05e-21	5.25361e-20	1007.95	29.171	565.765	47.4365	Y	Y	0	yellow
UMAG_03811	KIS68229	probable SOL1 - Protein with a possible role in tRNA export	622.492	275.735	449.113	1.15818	0.13828	1.88106e-17	1.80559e-16	516.884	59.5912	289.538	25.1659	Y	Y	1	burlywood
UMAG_10926	KIS72204	probable TFP1p - H -ATPase V1 domain 69 KD catalytic subunit	2596.87	1153.73	1875.3	1.15808	0.117818	2.89143e-23	4.46857e-22	948.379	73.9559	533.402	54.8285	Y	Y	0	yellow
UMAG_00668	KIS72256	related to SIP2 - subunit of the Snf1 serine/threonine protein kinase complex	235.9	103.5	169.7	1.15755	0.179536	3.93852e-11	2.14889e-10	57.2932	4.53788	32.1119	8.58448	Y	Y	12	cyan
UMAG_02957	KIS68978	hypothetical protein	215.879	94.9907	155.435	1.15721	0.174474	1.1345e-11	6.52616e-11	139.37	20.9537	77.9467	9.0812	Y	Y	8	light-cyan
UMAG_03074	KIS69096	probable transcription factor BTF3a	567.569	252.009	409.789	1.15617	0.131558	5.24032e-19	5.8066e-18	761.129	48.5717	427.423	32.4586	Y	Y	0	yellow
UMAG_06055	KIS65966	probable RPP0 - acidic ribosomal protein L10.e	2675.16	1189.72	1932.44	1.1554	0.122972	1.96072e-21	2.66097e-20	1908.86	109.778	1075.01	127.486	Y	Y	0	yellow
UMAG_04081	KIS68039	related to glutathione S-transferase	296.163	130.983	213.573	1.15483	0.155949	4.54221e-14	3.34226e-13	284.485	29.8425	159.611	17.7427	Y	Y	0	pink
UMAG_11167	KIS72301	probable TIM17 - mitochondrial inner membrane import translocase subunit	361.756	160.704	261.23	1.15441	0.132988	1.37424e-18	1.44351e-17	483.105	44.0968	271.687	20.5576	Y	Y	0	yellow
UMAG_05358	KIS66360	hypothetical protein	60.8342	26.2046	43.5194	1.15434	0.254113	1.90171e-06	6.08945e-06	50.7063	9.69284	27.5826	5.77619	Y	Y	0	yellow
UMAG_01112	KIS71205	related to carboxyphosphonoenolpyruvate phosphonomutase	65.6745	28.497	47.0857	1.14892	0.251514	1.679e-06	5.43132e-06	44.5793	8.86996	24.5582	2.38083	Y	Y	2	magenta
UMAG_02783	KIS69452	related to branched-chain amino acid aminotransferase	913.448	407.14	660.294	1.14845	0.133943	3.1952e-18	3.25055e-17	512.48	38.5637	289.38	32.2731	Y	Y	0	yellow
UMAG_00779	KIS72375	related to mitochondrial ribosomal protein YmL8	204.825	90.6788	147.752	1.14753	0.177114	3.21285e-11	1.76188e-10	158.08	24.9495	88.7485	9.2882	Y	Y	0	yellow
UMAG_12328	KIS65855	hypothetical protein	402.209	179.013	290.611	1.14655	0.154076	3.44123e-14	2.57892e-13	342.771	53.5065	193.069	12.0341	Y	Y	0.5	dark-green
UMAG_02596	KIS69248	hypothetical protein	148.342	65.1337	106.738	1.14647	0.215244	3.4243e-08	1.35795e-07	207.959	51.7478	115.761	10.4082	Y	Y	0.5	burlywood
UMAG_11708	KIS69813	related to DTD1 - D-Tyr-tRNA(Tyr) deacylase activity	151.18	67.0244	109.102	1.14637	0.175231	2.1328e-11	1.1898e-10	162.919	19.3423	91.4225	4.53121	Y	Y	2	yellow
UMAG_10705	KIS66289	cyclin-dependent kinase 1	124.768	54.7586	89.7635	1.14628	0.208869	1.41151e-08	5.85261e-08	93.7873	15.7714	52.4723	11.9494	Y	Y	0	yellow
UMAG_10102	KIS71906	related to SLY1 protein	514.473	228.225	371.349	1.14548	0.17199	9.50479e-12	5.51175e-11	152.818	16.3009	86.2708	20.0639	Y	Y	2	light-green
UMAG_02883	KIS68897	related to Prefoldin subunit 1	112.157	49.5505	80.8535	1.14311	0.200159	3.93155e-09	1.7301e-08	192.963	14.6348	108.195	17.5234	Y	Y	2	yellow
UMAG_02476	KIS69964	related to coatomer delta subunit (delta-coat protein)	670.827	300.758	485.793	1.14024	0.139522	1.06004e-16	9.53743e-16	270.943	12.733	153.851	24.4536	Y	Y	2	yellow
UMAG_00423	KIS72000	related to CAP1 - F-actin capping protein alpha subunit	673.223	299.895	486.559	1.14024	0.171792	1.10993e-11	6.39618e-11	392.511	21.1733	221.831	52.0708	Y	Y	8	cyan
UMAG_05149	KIS70075	hypothetical protein	219.211	97.7546	158.483	1.14006	0.172822	1.46173e-11	8.31451e-11	139.345	8.09096	78.4398	13.689	Y	Y	0	pink
UMAG_03011	KIS69031	hypothetical protein	144.797	64.5327	104.665	1.13752	0.175834	3.51844e-11	1.92294e-10	54.8263	4.59292	31.0912	4.00973	Y	Y	0.5	dark-green
UMAG_03689	KIS68110	related to TAD2 - subunit of tRNA-specific adenosine-34 deaminase	170.937	75.591	123.264	1.13745	0.213896	3.61447e-08	1.42723e-07	146.569	25.2102	82.1075	18.4473	Y	Y	0.5	red
UMAG_11260	KIS70940	probable serine-tRNA ligase	1178.15	529.239	853.693	1.13664	0.141498	3.33542e-16	2.86353e-15	582.091	68.1585	331.37	33.4928	Y	Y	0	yellow
UMAG_01249	KIS71348	probable LSM3 - U6 snRNA-associated Sm-like protein	55.4307	24.0957	39.7632	1.13624	0.267227	7.34146e-06	2.15181e-05	111.614	22.962	62.0896	12.5496	Y	Y	0	yellow
UMAG_10310	KIS69333	related to pyridoxal kinase	257.495	115.199	186.347	1.1355	0.170459	9.45972e-12	5.49055e-11	156.828	23.8745	88.515	8.31527	Y	Y	0	yellow
UMAG_05841	KIS66101	related to calcium-binding mitochondrial carrier protein	348.999	155.875	252.437	1.13508	0.173703	2.24858e-11	1.25007e-10	155.108	26.6623	87.8855	15.2177	Y	Y	0	yellow
UMAG_03956	KIS67905	hypothetical protein	513.15	230.968	372.059	1.13505	0.137825	6.33727e-17	5.82603e-16	701.273	20.6445	399.146	52.5493	Y	Y	0	yellow
UMAG_00756	KIS72351	probable GDI1 - GDP dissociation inhibitor	3629.86	1615.66	2622.76	1.13442	0.193029	1.44637e-09	6.70267e-09	1793.28	468.688	1008.9	95.3662	Y	Y	2	light-green
UMAG_10466	KIS72152	related to MEU1 - multiple enhancer of UAS2	488.741	220.392	354.566	1.13428	0.131615	2.41171e-18	2.47689e-17	346.172	17.0556	197.719	14.9732	Y	Y	0	yellow
UMAG_04831	KIS66769	probable MGM101 - mitochondrial genome maintenance protein	449.296	202.532	325.914	1.13411	0.129817	8.64534e-19	9.40217e-18	303.387	28.9242	173.418	14.6969	Y	Y	0	burlywood
UMAG_02572	KIS69223	related to UFD1 - ubiquitin fusion degradation protein	276.974	124.386	200.68	1.13335	0.154877	8.99267e-14	6.3768e-13	145.16	11.048	82.7858	11.3529	Y	Y	0	burlywood
UMAG_15008	KIS67959	probable PGI1 - Glucose-6-phosphate isomerase	2591.52	1168.44	1879.98	1.1325	0.140686	3.08796e-16	2.67402e-15	1235.23	52.2221	703.171	96.8993	Y	Y	8	cyan
UMAG_11334	KIS71521	related to RMT2 - protein-arginine N-methyltransferase	477.785	214.954	346.369	1.13173	0.152684	4.37533e-14	3.23765e-13	243.514	19.4873	138.497	23.091	Y	Y	0	yellow
UMAG_02968	KIS68989	related to LSM1 - Sm-like (Lsm) protein	63.8889	28.0214	45.9551	1.13137	0.256056	3.4536e-06	1.06551e-05	96.031	21.5837	53.1142	3.57856	Y	Y	0	pink
UMAG_04988	KIS67121	probable ODC2 - Mitochondrial 2-oxodicarboxylate carrier	94.2121	41.5794	67.8957	1.13125	0.23186	3.73088e-07	1.29927e-06	68.5412	11.6699	38.3766	9.70529	Y	Y	0	pink
UMAG_10714	KIS67183	hypothetical protein	293.113	131.447	212.28	1.12939	0.178103	8.02437e-11	4.24549e-10	407.441	31.7609	231.429	47.9199	Y	Y	8	light-cyan
UMAG_05789	KIS67007	hypothetical protein	50.0706	21.7541	35.9123	1.12798	0.287718	3.04103e-05	8.12786e-05	61.2901	11.8371	33.9574	10.3537	Y	Y	0.5	dark-green
UMAG_05511	KIS66519	probable GTPase Rab7 protein	1152.87	522.946	837.907	1.12706	0.124293	4.34327e-20	5.21516e-19	1254.46	66.2234	719.072	65.8417	Y	Y	0.5	magenta
UMAG_00851	KIS70926	related to BFR1 - Nuclear segregation protein	1457.37	654.57	1055.97	1.12686	0.17715	7.05769e-11	3.76373e-10	644.439	71.6462	365.766	75.4626	Y	Y	2	yellow
UMAG_00111	KIS71670	related to membrane protein	237.692	107.206	172.449	1.12686	0.160084	6.89404e-13	4.50764e-12	216.829	22.6729	124.356	7.07543	Y	Y	0.5	beige
UMAG_05042	KIS67176	hypothetical protein	264.073	119.014	191.544	1.12669	0.161809	1.18868e-12	7.60283e-12	118.707	10.6888	67.8081	9.26645	Y	Y	4	magenta
UMAG_11283	KIS71200	related to YSC84 - protein involved in the organization of the actin cytoskeleton	1587.44	717.4	1152.42	1.12579	0.150651	2.77742e-14	2.10836e-13	1131.28	122.427	645.947	71.9818	Y	Y	0.5	light-cyan
UMAG_11875	KIS70270	probable ERG20 - farnesyl-pyrophosphate synthetase	738.383	334.884	536.634	1.12518	0.132504	7.33133e-18	7.23059e-17	472.59	51.3685	271.59	21.8289	Y	Y	0	yellow
UMAG_10907	KIS67471	probable MMS2 - part of the error-free postreplication repair pathway	211.986	95.1907	153.588	1.12468	0.186988	6.38342e-10	3.10052e-09	343.732	56.7697	195.404	19.8181	Y	Y	0	pink
UMAG_05434	KIS66440	probable Shwachman-Bodian-Diamond syndrome protein	330.044	148.897	239.471	1.12365	0.166581	5.44538e-12	3.22431e-11	289.839	52.071	165.798	6.33162	Y	Y	0	burlywood
UMAG_15050	KIS71245	probable VAC8 - vacuolar membrane protein	1757.73	798.176	1277.96	1.12357	0.128958	1.04121e-18	1.12291e-17	702.416	47.8549	404.348	58.8811	N	N	0	pink
UMAG_02445	KIS69933	probable serine/threonine protein phosphatase ppe1	136.556	61.1587	98.8573	1.12323	0.190786	1.42897e-09	6.62681e-09	86.9821	7.17201	49.488	11.685	Y	Y	0.5	beige
UMAG_11645	KIS71244	related to COX13 - cytochrome-c oxidase chain VIa	757.706	344.851	551.278	1.123	0.121689	9.89821e-21	1.24644e-19	1229.44	71.65	708.075	17.2615	Y	Y	0	yellow
UMAG_03450	KIS68355	related to FAP7 - involved in the oxidative stress response	127.28	57.1193	92.1995	1.12257	0.198304	5.35138e-09	2.31082e-08	133.942	17.0745	75.6146	8.87793	Y	Y	0	yellow
UMAG_11786	KIS70166	related to YIP1 - Golgi integral membrane protein	415.716	187.513	301.615	1.12216	0.173626	3.6474e-11	1.99173e-10	324.025	35.2076	185.234	35.1063	Y	Y	6	cyan
UMAG_05580	KIS66591	probable ADP-ribosylation factor 6	757.015	342.903	549.959	1.12168	0.129483	1.19339e-18	1.26382e-17	927.456	102.771	533.287	57.6606	Y	Y	2	light-green
UMAG_10797	KIS71104	related to 6-phosphofructo-2-kinase	196.713	87.8922	142.303	1.12017	0.212973	5.12356e-08	1.9843e-07	79.747	19.0452	45.4079	10.3678	Y	Y	0	beige
UMAG_11232	KIS65839	probable Actin	13461.5	6156.21	9808.85	1.11914	0.101637	1.19007e-28	2.712e-27	8025.16	411.119	4643.82	325.749	Y	Y	0	yellow
UMAG_05890	KIS66152	related to RSM24 - mitochondrial ribosomal protein of the small subunit	131.151	59.1205	95.1355	1.11773	0.189098	1.23052e-09	5.75607e-09	118.519	13.3555	67.823	8.18056	Y	Y	0	yellow
UMAG_00092	KIS71651	related to levodione reductase	173.217	78.0697	125.643	1.11734	0.187495	9.18102e-10	4.35458e-09	126.269	15.7832	72.4364	12.9975	Y	Y	0	burlywood
UMAG_00038	KIS71595	related to transaldolase	53.1386	23.3561	38.2473	1.1173	0.271601	1.37924e-05	3.88572e-05	26.0248	4.29989	14.682	3.97289	Y	Y	1	light-cyan
UMAG_04314	KIS67207	probable COF1 - cofilin	911.008	413.892	662.45	1.11727	0.140962	6.81611e-16	5.71103e-15	1458.9	216.962	837.499	21.0464	Y	Y	0	yellow
UMAG_03465	KIS68371	related to KEX1 protein precursor	305.753	137.537	221.645	1.11714	0.196081	4.35336e-09	1.90018e-08	104.183	4.59645	59.8245	17.1144	Y	Y	2	magenta
UMAG_02181	KIS69647	hypothetical protein	467.748	210.41	339.079	1.11555	0.200736	9.82464e-09	4.15905e-08	166.591	11.6613	95.9167	29.7995	Y	Y	0	pink
UMAG_02182	KIS69648	probable NADPH-dependent beta-ketoacyl reductase (rhlG)	162.484	73.8209	118.153	1.11502	0.164611	4.59616e-12	2.73904e-11	124.164	3.29892	71.4791	6.41817	Y	Y	0.5	dark-green
UMAG_06201	KIS65824	probable RVB1 - RUVB-like protein	606.485	277.013	441.749	1.11413	0.136229	1.04014e-16	9.38447e-16	277.704	14.4994	160.42	15.8301	Y	Y	0	yellow
UMAG_04865	KIS66806	related to DID4 - class E vacuolar-protein sorting and endocytosis factor	240.003	108.695	174.349	1.11382	0.180473	2.43818e-10	1.23438e-09	217.54	19.6995	125.161	26.9347	Y	Y	0.5	green
UMAG_11815	KIS70300	hypothetical protein	81.8708	36.5811	59.2259	1.11238	0.235245	8.11248e-07	2.73236e-06	31.2862	3.68819	17.9057	4.8743	N	Y	2	#N/A
UMAG_12129	KIS71372	related to Tubulin-specific chaperone A	81.8942	36.7234	59.3088	1.11204	0.218219	1.27067e-07	4.65602e-07	160.357	14.2238	91.2349	18.9932	Y	Y	0	burlywood
UMAG_00481	KIS72060	probable signal peptidase (endopeptidase SP18)	147.288	66.6812	106.984	1.11122	0.193492	3.36636e-09	1.49359e-08	186.25	25.336	106.898	14.8618	Y	Y	2	light-green
UMAG_05999	KIS65910	hypothetical protein	242.41	110.238	176.324	1.1103	0.168053	1.44449e-11	8.23599e-11	96.1895	12.1841	55.5477	10.2463	Y	Y	6	light-cyan
UMAG_10731	KIS66884	related to PEX19 - required for biogenesis of peroxisomes (peroxin)	388.074	177.011	282.542	1.1087	0.162794	3.55445e-12	2.14596e-11	230.084	40.6237	133.061	10.9079	Y	Y	0	pink
UMAG_04456	KIS67354	protein kinase A	108.544	48.9043	78.7243	1.10768	0.214091	8.35813e-08	3.13369e-07	59.8047	7.57211	34.465	8.42199	Y	Y	0	burlywood
UMAG_01866	KIS70709	hypothetical protein	225.061	102.336	163.698	1.10739	0.183979	6.36601e-10	3.09439e-09	250.482	47.1163	144.337	12.5337	Y	Y	4	yellow
UMAG_12306	KIS66539	related to MED7 - member of RNA Polymerase II transcriptional regulation mediator complex	92.9106	41.9604	67.4355	1.10637	0.216507	1.16995e-07	4.31387e-07	65.9996	8.32244	37.4776	6.2375	Y	Y	1	dark-green
UMAG_03858	KIS68277	probable HIS7 - glutamine amidotransferase/cyclase	327.649	150.131	238.89	1.10621	0.151418	1.01065e-13	7.0965e-13	119.251	12.9343	69.0456	6.35181	Y	Y	2	yellow
UMAG_10984	KIS67500	hypothetical protein	253.874	115.293	184.583	1.1059	0.189576	1.97686e-09	9.00601e-09	210.658	35.107	121.55	25.3165	Y	Y	0	burlywood
UMAG_12289	KIS67030	related to CAB5 - probable dephospho-CoA kinase	107.309	48.7116	78.0104	1.10463	0.193135	3.97818e-09	1.74707e-08	85.696	9.3549	49.2363	6.59569	Y	Y	4	salmon
UMAG_06314	KIS70227	related to MSS116 - RNA helicase of the DEAD box family	1090.48	502.479	796.477	1.10368	0.126621	1.0614e-18	1.14278e-17	377.248	32.158	219.854	20.9086	Y	Y	0	yellow
UMAG_12099	KIS69688	hypothetical protein	60.0454	26.7507	43.398	1.10256	0.265248	1.16095e-05	3.30821e-05	76.3916	17.0178	43.0523	8.19514	Y	Y	1	green
UMAG_01201	KIS71301	related to TMT1 - trans-aconitate methyltransferase	254.155	112.659	183.407	1.10248	0.281768	3.15383e-05	8.40502e-05	149.358	9.78985	84.238	41.834	Y	Y	4	magenta
UMAG_11630	KIS72410	hypothetical protein	22.8541	9.7954	16.3248	1.099	0.368708	0.00099787	0.00210318	30.4879	5.2669	16.9514	2.31413	Y	Y	0	pink
UMAG_03772	KIS68193	related to tetrahydrofolylpolyglutamate synthase (met6 )	608.447	278.272	443.36	1.09881	0.182904	6.88187e-10	3.32512e-09	245.771	23.8171	142.537	35.6388	Y	Y	0	yellow
UMAG_05746	KIS66965	related to arginine-tRNA-protein transferase	148.837	67.959	108.398	1.0986	0.190977	3.2582e-09	1.44859e-08	65.7129	8.90789	38.1669	5.09115	Y	Y	12	light-cyan
UMAG_10859	KIS66821	related to UV-induced protein uvi15	410.62	188.958	299.789	1.09779	0.1576	1.20938e-12	7.71996e-12	909.424	89.8326	530.695	72.4428	Y	Y	0	beige
UMAG_05365	KIS66370	probable protein phosphatase 2A regulatory B subunit	416.604	192.294	304.449	1.09672	0.142075	4.3976e-15	3.52026e-14	198.414	17.3897	116.639	15.5448	Y	Y	0	burlywood
UMAG_10989	KIS67511	related to NADH-ubiquinone oxidoreductase 21 kDa subunit	441.801	202.845	322.323	1.09634	0.175091	1.39926e-10	7.20831e-10	609.716	110.102	354.018	26.951	Y	Y	0	yellow
UMAG_10558	KIS66319	probable tubulin beta chain	827.354	384.599	605.976	1.09333	0.116582	2.5212e-21	3.38605e-20	392.032	10.6137	230.521	18.2811	Y	Y	0	yellow
UMAG_02694	KIS69358	hypothetical protein	155.621	71.2006	113.411	1.09293	0.195729	8.7192e-09	3.70322e-08	88.3929	18.8865	51.2722	6.46933	Y	Y	0	beige
UMAG_10315	KIS69341	hypothetical protein	66.7088	29.9901	48.3494	1.09171	0.255763	7.23366e-06	2.12503e-05	129.029	22.1186	73.7597	19.7933	Y	Y	6	cyan
UMAG_03952	KIS67899	related to TIF35 - translation initiation factor eIF3 subunit	444.797	205.809	325.303	1.09052	0.157735	1.75142e-12	1.09e-11	322.575	23.2554	188.215	26.1219	Y	Y	0	yellow
UMAG_02332	KIS69811	hypothetical protein	77.5155	35.1992	56.3574	1.08912	0.237168	1.61823e-06	5.24787e-06	74.227	5.48029	42.512	12.0821	Y	Y	2	magenta
UMAG_10928	KIS72209	hypothetical protein	180.991	83.6343	132.312	1.08887	0.16929	4.73877e-11	2.56386e-10	86.6259	6.5736	50.5629	7.02127	Y	Y	0	yellow
UMAG_10804	KIS70347	probable KGD2 - dihydrolipoyl transsuccinylase component of the alpha-ketoglutarate dehydrogenase complex	1744.33	814.91	1279.62	1.08828	0.104619	9.15784e-26	1.73999e-24	827.888	29.8074	489.685	31.5377	Y	Y	0	yellow
UMAG_01879	KIS70723	related to INP54 - Phosphatidylinositol 4	207.903	96.2481	152.076	1.08703	0.160752	5.19383e-12	3.08384e-11	85.5796	9.04884	50.3703	6.13439	Y	Y	0.5	dark-green
UMAG_05654	KIS66869	probable ras-related GTP-binding protein	134.209	61.5984	97.9039	1.08652	0.205952	4.91768e-08	1.9103e-07	154.48	26.4583	89.9383	11.7522	Y	Y	0	pink
UMAG_01800	KIS70635	related to molybdopterin synthase large subunit	60.0658	27.3079	43.6868	1.08632	0.240656	2.37647e-06	7.50343e-06	60.2556	3.37684	34.8559	6.28685	Y	Y	2	yellow
UMAG_03308	KIS68740	probable Cytosol aminopeptidase	905.058	422.312	663.685	1.08567	0.127477	6.20321e-18	6.18406e-17	372.424	29.3161	219.478	18.1992	Y	Y	0	pink
UMAG_00296	KIS71868	hypothetical protein	472.107	219.764	345.935	1.08392	0.14581	4.01077e-14	2.97811e-13	173.354	14.3089	102.428	15.4124	Y	Y	1	light-cyan
UMAG_10232	KIS71395	probable cytochrome b5	697.065	324.57	510.818	1.08308	0.150222	2.1365e-13	1.45589e-12	1164.17	69.4004	686.364	109.417	Y	Y	4	cyan
UMAG_11610	KIS71973	hypothetical protein	294.114	136.355	215.235	1.08258	0.175326	2.48277e-10	1.25498e-09	228.326	23.574	134.001	22.8514	Y	Y	4	magenta
UMAG_03698	KIS68119	hypothetical protein	262.958	121.58	192.269	1.08138	0.185729	2.17955e-09	9.88063e-09	106.578	25.3414	62.4678	8.71738	Y	Y	0	yellow
UMAG_05069	KIS69996	related to short-chain dehydrogenase/reductase	6.93004	2.39525	4.66264	1.08115	0.702194	0.033522	0.0525867	3.75981	1.85395	1.73416	0.982598	N	N	12	#N/A
UMAG_05571	KIS66583	related to alpha/beta hydrolase	243.696	113.139	178.417	1.08027	0.169293	6.71526e-11	3.58814e-10	152.03	25.4876	89.2922	12.2923	Y	Y	0.5	dark-green
UMAG_11851	KIS71116	hypothetical protein	164.965	75.4354	120.2	1.07775	0.237614	2.12229e-06	6.75036e-06	265.859	78.3583	154.373	24.219	Y	Y	2	green-yellow
UMAG_00283	KIS71855	hypothetical protein	204.57	94.732	149.651	1.07597	0.201382	3.40606e-08	1.35154e-07	114.937	11.4739	67.3272	16.7359	Y	Y	8	cyan
UMAG_10579	KIS68011	related to mitotic checkpoint protein BUB3	151.225	69.8588	110.542	1.07563	0.207375	8.05756e-08	3.02803e-07	79.0013	16.785	46.3607	8.71552	Y	Y	6	salmon
UMAG_02622	KIS69279	hypothetical protein	229.258	106.913	168.085	1.07537	0.166965	4.56227e-11	2.47458e-10	183.467	19.9702	108.618	16.1986	Y	Y	0.5	dark-green
UMAG_06143	KIS66053	hypothetical protein	174.029	81.256	127.642	1.07523	0.165761	3.37208e-11	1.84607e-10	110.963	8.41985	65.7635	4.48602	Y	Y	0	yellow
UMAG_00080	KIS71639	related to 5-oxoprolinase	390.429	182.159	286.294	1.07519	0.16393	2.0774e-11	1.16191e-10	133.089	22.8625	78.7593	11.1613	Y	Y	0.5	dark-green
UMAG_01533	KIS70364	related to n-acetyltransferase	77.2621	35.6894	56.4758	1.07508	0.211588	1.44006e-07	5.23215e-07	99.5148	4.60694	58.3507	4.20675	Y	Y	0	yellow
UMAG_10961	KIS71830	probable Glycine cleavage system H protein	726.705	342.431	534.568	1.07373	0.117982	3.46151e-20	4.1797e-19	981.037	34.4963	584.402	32.6215	Y	Y	0	yellow
UMAG_03682	KIS68103	hypothetical protein	240.037	111.579	175.808	1.07295	0.186061	3.09192e-09	1.38036e-08	48.2899	7.68893	28.6224	6.15629	Y	N	1	red
UMAG_05283	KIS66283	probable RVS161 - protein involved in cell polarity development	324.824	152.561	238.692	1.07254	0.144573	4.54258e-14	3.34226e-13	277.16	28.2842	164.162	11.0922	Y	Y	0	beige
UMAG_10816	KIS70385	hypothetical protein	1120.16	518.471	819.316	1.07235	0.209431	1.13549e-07	4.19158e-07	1239.9	188.665	722.615	168.039	Y	Y	2	cyan
UMAG_01312	KIS71414	related to Vacuolar assembly protein VPS41	643.632	301.863	472.748	1.07198	0.14855	2.06157e-13	1.40631e-12	106.122	6.39652	63.2976	12.3443	Y	Y	0.5	dark-green
UMAG_00430	KIS72008	probable GCV1 - glycine decarboxylase	1219.23	573.627	896.43	1.07124	0.137729	2.81948e-15	2.28244e-14	600.747	50.9971	356.397	35.4103	Y	Y	0	pink
UMAG_05785	KIS67003	acyl transferase-like protein	4.63364	1.19579	2.91471	1.07075	0.96394	0.0547505	0.0817587	2.47416	2.75534	0.714276	0.207643	N	N	0	burlywood
UMAG_03765	KIS68185	probable DBP5 - ATP-dependent RNA helicase of the DEAD-box family involved in mRNA export	598.969	282.643	440.806	1.06938	0.125623	6.59864e-18	6.55803e-17	293.887	20.4171	175.497	16.9248	Y	Y	0	yellow
UMAG_04965	KIS67096	related to Signal recognition particle 14 kDa protein	199.17	93.3923	146.281	1.06862	0.160722	1.15615e-11	6.64475e-11	252.093	18.6752	150.303	20.952	Y	Y	0	yellow
UMAG_11350	KIS71936	related to acetyl coenzyme A synthetase / hypothetical protein	527.677	247.896	387.786	1.06858	0.150992	5.73013e-13	3.77336e-12	104.119	13.5408	62.1886	11.4996	N	Y	0	pink
UMAG_02272	KIS69750	hypothetical protein	433.442	199.088	316.265	1.06851	0.245276	4.86435e-06	1.46361e-05	704.459	235.893	409.319	84.2298	Y	Y	0	pink
UMAG_11698	KIS70442	probable VMA2 - H -ATPase V1 domain 60 KD subunit	4274.97	2020.96	3147.96	1.06781	0.120908	3.99575e-19	4.45813e-18	1813.04	176.464	1085.14	55.4156	Y	Y	2	yellow
UMAG_04910	KIS67038	hypothetical protein	235.056	106.886	170.971	1.06724	0.280526	5.134e-05	0.000132134	105.047	14.603	60.203	26.944	Y	Y	12	light-cyan
UMAG_01892	KIS70737	probable isocitrate lyase	332.003	156.472	244.237	1.06641	0.144922	7.25615e-14	5.20252e-13	121.681	14.9592	72.5859	6.2387	Y	Y	0	burlywood
UMAG_04127	KIS67623	probable ERG26 - C-3 sterol dehydrogenase (C-4 decarboxylase)	331.401	155.464	243.432	1.06633	0.168973	1.07215e-10	5.60361e-10	159.147	28.5648	94.8772	8.63437	Y	Y	2	yellow
UMAG_04271	KIS67778	hypothetical protein	140.699	65.4626	103.081	1.06624	0.197797	2.72632e-08	1.0946e-07	104.582	10.8582	61.74	15.5092	Y	Y	0	green
UMAG_12108	KIS72182	probable syntaxin	160.725	75.176	117.95	1.0659	0.179768	1.18675e-09	5.56343e-09	96.9531	8.45027	57.5297	11.8786	Y	Y	0	pink
UMAG_04285	KIS67790	probable isocitrate lyase	2068.67	962.625	1515.65	1.06538	0.207159	1.01986e-07	3.78856e-07	871.501	103.222	511.047	150.209	Y	Y	1	red
UMAG_04962	KIS67093	related to ARG82 - dual-specificity inositol polyphosphate kinase required for regulation of phosphate- and nitrogen-responsive genes	220.825	103.319	162.072	1.06501	0.181979	1.87681e-09	8.56229e-09	148.297	16.6828	88.0948	19.6112	Y	Y	0.5	beige
UMAG_10912	KIS67491	hypothetical protein (C-terminal fragment)	89.0978	41.4523	65.2751	1.06394	0.213794	2.49452e-07	8.81059e-07	65.2892	8.25649	38.2427	6.21302	Y	N	0	green
UMAG_04210	KIS67710	probable phytoene dehydrogenase	266.56	125.011	195.785	1.06346	0.17409	3.91623e-10	1.93861e-09	98.0563	13.8063	58.5349	12.862	Y	Y	0	burlywood
UMAG_00805	KIS72403	hypothetical protein	72.8926	33.0995	52.996	1.06195	0.289034	8.81213e-05	0.000219539	36.3933	8.99521	21.1341	7.78082	Y	Y	1	magenta
UMAG_04192	KIS67691	probable eukaryotic translational release factor 1	432.445	204.55	318.498	1.06191	0.143811	5.98746e-14	4.35574e-13	220.413	17.9343	132.03	12.3676	Y	Y	2	yellow
UMAG_10067	KIS69651	hypothetical protein	40.0304	18.1554	29.0929	1.06188	0.294892	0.000119153	0.000287749	40.8936	7.13956	23.5816	5.22907	Y	Y	4	magenta
UMAG_00842	KIS70914	probable aflatoxin efflux pump AFLT	59.0282	27.0288	43.0285	1.0615	0.270255	3.22829e-05	8.58221e-05	22.9469	4.51142	13.3945	3.54405	N	N	0.5	light-cyan
UMAG_06426	KIS65726	related to SLC1 - 1-acyl-sn-gylcerol-3-phosphate acyltransferase	172.499	80.8649	126.682	1.06119	0.184199	3.26906e-09	1.45242e-08	112.196	7.42095	67.2139	15.1723	Y	Y	8	cyan
UMAG_01026	KIS71114	hypothetical protein	555.765	261.984	408.874	1.05978	0.167171	8.95609e-11	4.71527e-10	161.596	6.95791	96.7593	22.2263	Y	Y	1	magenta
UMAG_00589	KIS72171	related to GLO4 - glyoxalase II (hydroxyacylglutathione hydrolase)	433.316	205.559	319.438	1.05974	0.132236	4.37971e-16	3.70326e-15	360.837	23.3336	217.089	22.3725	Y	Y	0.5	burlywood
UMAG_01408	KIS71513	probable MCA1 - Metacaspase	1479.82	698.077	1088.95	1.05906	0.167248	9.32765e-11	4.9029e-10	820.956	145.339	490.176	43.0899	Y	Y	1	light-cyan
UMAG_10483	KIS68096	related to SPS19 û peroxisomal 2	92.1378	43.0273	67.5825	1.05757	0.212577	2.54636e-07	8.97708e-07	75.5546	7.43226	44.9274	8.77504	Y	Y	1	dark-green
UMAG_03116	KIS69145	Acyltransferase invovled in MEL production	5.13285	1.68687	3.40986	1.05709	0.768559	0.0450702	0.0686359	1.86474	0.333088	0.779494	0.550642	N	N	12	light-cyan
UMAG_11675	KIS70321	hypothetical protein	21.2971	9.35338	15.3252	1.05586	0.385324	0.00220848	0.00438843	39.7375	8.76592	22.0604	4.81568	Y	Y	0.5	red
UMAG_02416	KIS69902	hypothetical protein	17.979	7.70141	12.8402	1.05559	0.436787	0.00539324	0.00998576	24.6562	8.42893	12.9449	3.65839	N	N	0	dark-green
UMAG_11420	KIS71781	hypothetical protein	8.73375	3.12371	5.92873	1.05366	0.686093	0.0344351	0.0539274	11.9432	9.10127	5.14535	1.18074	Y	Y	2	#N/A
UMAG_04561	KIS67462	related to RBK1 - putative ribokinase	130.93	61.8399	96.3849	1.05351	0.174349	6.06801e-10	2.95398e-09	81.5226	3.48648	49.1462	6.66243	Y	Y	1	dark-green
UMAG_02046	KIS69506	probable PRE9 - 20S proteasome subunit Y13 (alpha3)	684.958	325.687	505.322	1.05319	0.148427	5.07809e-13	3.35486e-12	561.253	62.9457	338.561	36.7024	Y	Y	0	yellow
UMAG_10842	KIS68757	probable RPL10 - 60S large subunit ribosomal protein L10	2222.59	1056.86	1639.73	1.05182	0.149921	8.76467e-13	5.69616e-12	2250.54	305.756	1358.65	184.691	Y	Y	0	yellow
UMAG_05621	KIS66831	hypothetical protein	17.9725	7.6056	12.789	1.05179	0.45131	0.0067868	0.0123327	4.88046	2.47848	2.58367	0.772843	N	N	12	#N/A
UMAG_04239	KIS67741	probable TIF11 - translation initiation factor eIF1a	715.396	339.636	527.516	1.05146	0.160881	2.4823e-11	1.37409e-10	1069.82	180.057	642.786	82.3985	Y	Y	0	yellow
UMAG_11632	KIS72419	related to bacterial glycerol-3-phosphate acyltransferases	314.542	148.668	231.605	1.05095	0.179981	2.06723e-09	9.39121e-09	83.3644	9.11279	50.1485	12.4596	Y	Y	2	light-green
UMAG_00515	KIS72093	hypothetical protein	204.859	95.7302	150.295	1.05024	0.230168	1.93299e-06	6.1848e-06	127.561	8.18728	75.6524	26.9733	Y	Y	0.5	dark-green
UMAG_04714	KIS66653	related to TPT1 - tRNA 2`-phosphotransferase	157.343	74.4845	115.914	1.05014	0.181144	2.66267e-09	1.19867e-08	100.179	11.9667	60.0218	7.66838	N	Y	0.5	burlywood
UMAG_01436	KIS71543	hypothetical protein	58.0494	26.759	42.4042	1.04954	0.272669	4.52892e-05	0.000117686	24.7535	5.69906	14.4618	4.08398	Y	Y	6	cyan
UMAG_04541	KIS67443	hypothetical protein	127.778	60.1198	93.9487	1.04871	0.210676	2.50911e-07	8.85731e-07	145.325	32.0319	86.437	6.33919	Y	Y	0	yellow
UMAG_06285	KIS70194	related to carbamoyl-phosphate synthase small chain	603.751	286.708	445.23	1.04838	0.172375	4.64782e-10	2.28674e-09	284.26	10.4599	170.174	35.9222	Y	Y	4	red
UMAG_05992	KIS65903	related to ENT3 - cytoskeletal adaptor	433.017	204.611	318.814	1.04737	0.1942	2.68448e-08	1.07868e-07	218.507	21.1024	131.264	35.5994	Y	Y	4	light-green
UMAG_11027	KIS66134	probable SEC22 - synaptobrevin (V-SNARE)	181.934	86.2303	134.082	1.04736	0.180418	2.55858e-09	1.15341e-08	179.156	21.42	108.161	18.0532	Y	Y	2	yellow
UMAG_10675	KIS66657	hypothetical protein	313.163	149.972	231.568	1.04724	0.131986	8.47444e-16	7.04568e-15	250.521	5.31855	151.911	8.78781	Y	Y	4	magenta
UMAG_11164	KIS72296	hypothetical protein	131.147	62.082	96.6147	1.0461	0.194469	2.94423e-08	1.17578e-07	134.495	18.879	80.8103	8.20827	Y	Y	0	dark-green
UMAG_01971	KIS70823	hypothetical protein	308.694	146.955	227.825	1.04609	0.168505	2.12037e-10	1.08025e-09	489.389	65.9719	295.439	37.3295	Y	Y	0.5	light-cyan
UMAG_11344	KIS71918	hypothetical protein	253.895	121.561	187.728	1.04511	0.143796	1.46151e-13	1.00762e-12	180.641	9.81657	109.235	4.95749	Y	Y	0.5	beige
UMAG_03537	KIS68449	probable ornithine carbamoyltransferase precursor	322.981	154.735	238.858	1.04451	0.137673	1.32782e-14	1.02482e-13	190.172	18.3468	115.471	10.6132	Y	Y	2	light-green
UMAG_11130	KIS67706	hypothetical protein	218.907	103.968	161.437	1.0443	0.183364	4.80265e-09	2.08362e-08	300.638	54.3109	180.95	22.4474	Y	Y	0	yellow
UMAG_05687	KIS66902	probable PRE5 - 20S proteasome subunit (alpha6)	732.616	350.296	541.456	1.04326	0.155379	7.52633e-12	4.39603e-11	568.396	54.0296	343.243	58.6314	Y	Y	0	yellow
UMAG_11688	KIS70417	hypothetical protein	76.2224	35.7125	55.9674	1.04252	0.242098	6.47443e-06	1.92033e-05	127.756	28.1858	74.993	10.2122	Y	Y	0	yellow
UMAG_00440	KIS72018	hypothetical protein	125.83	59.6806	92.7554	1.04112	0.193674	3.05571e-08	1.21626e-07	87.4822	13.1078	52.7006	9.07415	Y	Y	0.5	beige
UMAG_01275	KIS71375	probable PRE3 - 20S proteasome subunit (beta1)	532.585	254.965	393.775	1.04044	0.16108	4.18734e-11	2.28079e-10	534.851	40.5301	323.421	55.0969	Y	Y	0	yellow
UMAG_04384	KIS67283	hypothetical protein	262.343	126.544	194.444	1.033	0.148058	1.22501e-12	7.812e-12	211.494	13.2998	129.068	10.2248	Y	Y	0	burlywood
UMAG_03172	KIS68601	zinc-finger transcription factor	1022.3	480.135	751.219	1.03288	0.252808	1.69144e-05	4.71386e-05	565.36	60.5552	337.493	137.362	Y	Y	0.5	red
UMAG_01686	KIS70515	hypothetical protein	1424.07	683.269	1053.67	1.03249	0.173478	1.06419e-09	5.02167e-09	431.172	59.3715	261.708	56.3281	Y	Y	0.5	red
UMAG_11578	KIS66465	probable PRE6 - 20S proteasome subunit (alpha4)	1003.88	486.367	745.123	1.03239	0.121889	9.99594e-18	9.79875e-17	872.298	62.8226	534.324	46.6159	Y	Y	8	salmon
UMAG_01616	KIS70440	related to MRPL24 - mitochondrial ribosomal protein	83.3827	39.5387	61.4607	1.03218	0.225582	1.89418e-06	6.06966e-06	118.098	20.0533	71.2049	7.69917	Y	Y	0	pink
UMAG_02011	KIS70866	hypothetical protein	24.4017	10.7456	17.5737	1.03149	0.408416	0.00415454	0.00785825	7.68271	3.7001	4.37095	0.736178	N	N	2	magenta
UMAG_11644	KIS71237	probable GLR1 - glutathione reductase (NADPH)	1434.09	695.209	1064.65	1.03072	0.124775	5.94417e-17	5.50134e-16	662.546	56.3316	407.557	47.9246	Y	Y	0	yellow
UMAG_11050	KIS67966	Ras-GTPase	302.328	145.113	223.72	1.03014	0.18032	4.47302e-09	1.94847e-08	314.719	38.7114	191.336	38.8456	Y	Y	8	magenta
UMAG_02202	KIS69670	hypothetical protein	219.484	105.935	162.709	1.03003	0.155524	1.42583e-11	8.14398e-11	174.4	3.77997	106.574	14.1594	Y	Y	0	yellow
UMAG_12131	KIS71383	probable human translationally-controlled tumor protein (TCTP)	1632.92	793.566	1213.24	1.0294	0.113673	5.4811e-20	6.5449e-19	2175.44	146.303	1339.65	53.0108	Y	Y	0	yellow
UMAG_05509	KIS66516	related to RRP1 - involved in processing rRNA precursor species to mature rRNAs	290.915	139.082	214.999	1.02899	0.201338	1.27945e-07	4.68553e-07	132.809	31.293	80.0702	13.2388	N	N	1	red
UMAG_01870	KIS70714	related to glutathione-S-transferase	294.667	142.221	218.444	1.02898	0.155413	1.46212e-11	8.31451e-11	237.625	10.0972	145.412	25.8536	Y	Y	4	light-cyan
UMAG_03110	KIS69138	related to ZRT2 - Zinc transporter II	3.0839	0.709899	1.8969	1.02855	1.02485	0.067402	0.0985553	1.30747	0.797431	0.397271	0.100452	N	N	6	#N/A
UMAG_04442	KIS67340	probable DED81 - asparaginyl-tRNA-synthetase	1336.9	647.779	992.34	1.02762	0.141767	1.70386e-13	1.16971e-12	513.597	55.0838	314.043	37.4945	Y	Y	2	yellow
UMAG_00658	KIS72245	probable 40s ribosomal protein S13.e	833.79	400.957	617.374	1.02762	0.178331	3.30075e-09	1.46549e-08	1226.72	170.849	747.59	143.893	Y	Y	0	yellow
UMAG_01055	KIS71145	hypothetical protein	125.278	59.482	92.3802	1.02715	0.228706	2.82337e-06	8.81108e-06	46.4596	4.16679	27.9921	9.17579	Y	Y	0.5	dark-green
UMAG_11205	KIS66012	probable YPT6 - GTP-binding protein of the rab family	665.214	321.151	493.182	1.02503	0.169881	6.49045e-10	3.14541e-09	679.081	98.7786	415.975	65.3173	Y	Y	2	light-green
UMAG_04943	KIS67075	probable 40S ribosomal protein S26	1053.07	508.874	780.97	1.02463	0.166591	3.12993e-10	1.56861e-09	1914.14	296.578	1170.13	153.035	Y	Y	0	yellow
UMAG_01233	KIS71333	probable 3-phosphoglycerate dehydrogenase	1678.4	815.25	1246.83	1.0244	0.140444	1.23357e-13	8.5779e-13	762.024	51.5398	468.216	57.7748	Y	Y	0	yellow
UMAG_15025	KIS66208	probable NADP-dependent alcohol dehydrogenase	9.49958	3.81953	6.65955	1.0238	0.560579	0.0224251	0.0365455	7.53819	2.24834	3.76807	1.42097	N	N	6	cyan
UMAG_10252	KIS70658	related to 3-oxoacyl-(acyl carrier protein) reductase	336.298	163.141	249.72	1.02342	0.151957	6.73293e-12	3.94689e-11	257.06	34.285	157.953	4.35349	Y	Y	0	burlywood
UMAG_11598	KIS65963	related to oxidoreductase	467.986	226.296	347.141	1.0233	0.169874	6.90543e-10	3.32904e-09	347.04	24.1094	212.242	43.2245	Y	Y	0	burlywood
UMAG_10357	KIS66543	probable BAT1- branched chain amino acid aminotransferase	864.926	420.707	642.817	1.02325	0.135666	1.82527e-14	1.39212e-13	454.96	41.8289	279.416	21.7714	Y	Y	2	yellow
UMAG_02753	KIS69422	hypothetical protein	23.8644	10.7115	17.2879	1.02253	0.379298	0.00263771	0.00516353	21.0376	4.64286	11.9529	4.53786	N	Y	8	cyan
UMAG_01335	KIS71436	probable glutaryl-CoA dehydrogenase	267.776	129.197	198.486	1.0225	0.181727	7.46656e-09	3.18166e-08	132.719	24.1444	81.0058	10.0768	Y	Y	0	burlywood
UMAG_10741	KIS66913	related to Sedlin (trafficking protein particle complex protein 2)	100.06	47.5159	73.788	1.02243	0.239203	7.67761e-06	2.24472e-05	101.552	21.6644	61.3872	15.0976	Y	Y	6	cyan
UMAG_02385	KIS69869	probable phospho-2-dehydro-3-deoxyheptonate aldolase	497.82	242.342	370.081	1.02212	0.138889	7.59053e-14	5.41223e-13	283.253	23.607	174.292	16.3062	Y	Y	4	cyan
UMAG_00773	KIS72369	hypothetical protein	56.9872	26.8911	41.9392	1.02143	0.268207	5.5357e-05	0.000141626	73.3383	15.6298	43.7157	10.3031	Y	Y	0	burlywood
UMAG_12178	KIS70882	related to 5-carboxyvanillate decarboxylase	298.354	144.227	221.29	1.02111	0.178397	4.23334e-09	1.85155e-08	200.137	36.164	122.284	15.7889	Y	Y	12	magenta
UMAG_00817	KIS72418	probable COP9 signalosome complex subunit 2	132.986	63.0678	98.027	1.01984	0.243912	1.16219e-05	3.3103e-05	61.6588	12.6481	37.5343	13.3449	Y	Y	4	cyan
UMAG_04277	KIS67782	probable N-acetyltransferase 5	179.375	87.0019	133.188	1.01657	0.177649	4.32578e-09	1.88942e-08	203.409	28.9548	125.063	9.5878	Y	Y	2	yellow
UMAG_05970	KIS66233	related to aldehyde dehydrogenase	685.574	335.22	510.397	1.01654	0.133759	1.2232e-14	9.48603e-14	324.574	41.0045	200.262	11.5269	Y	Y	0	burlywood
UMAG_10999	KIS65673	related to NRK1 - Nicotinamide riboside kinase	242.32	117.287	179.803	1.01637	0.187153	2.29153e-08	9.31025e-08	179.841	24.2593	110.242	23.2782	Y	Y	0	burlywood
UMAG_00578	KIS72160	b mating type locus	150.218	57.7061	103.962	1.01574	0.631998	0.0309448	0.0489093	53.7803	6.69189	26.1436	19.9181	N	N	4	magenta
UMAG_03553	KIS68466	hypothetical protein	3.84389	0.958403	2.40115	1.0121	0.992423	0.0654685	0.096087	3.45709	3.21364	1.1932	0.227158	N	N	0.5	#N/A
UMAG_01163	KIS71263	hypothetical protein	278.301	136.164	207.232	1.0114	0.149377	5.37144e-12	3.18344e-11	120.554	10.5907	74.7538	9.67005	Y	Y	0	yellow
UMAG_10631	KIS69135	hypothetical protein	60.8766	28.7949	44.8358	1.01094	0.271118	7.75468e-05	0.000195227	42.4325	11.5889	25.8574	6.41857	Y	Y	0.5	beige
UMAG_01621	KIS70445	related to BNA3 - kynurenine aminotransferase	287.501	140.968	214.235	1.00983	0.143768	9.07206e-13	5.87818e-12	121.324	10.0296	75.4446	7.42594	Y	Y	0	salmon
UMAG_10414	KIS67748	hypothetical protein	198.24	96.5871	147.414	1.00861	0.184447	1.8759e-08	7.66984e-08	183.766	24.8299	112.935	18.7163	Y	Y	2	light-green
UMAG_04578	KIS67480	hypothetical protein	311.905	153.089	232.497	1.00853	0.144614	1.29173e-12	8.17294e-12	104.614	9.61296	65.1046	5.26241	Y	Y	6	green
UMAG_05888	KIS66150	related to transcription elongation factor TFIIS	111.914	54.4272	83.1707	1.00804	0.19325	7.60921e-08	2.86454e-07	79.5817	10.6678	48.7902	3.24399	Y	Y	0	burlywood
UMAG_10607	KIS69469	related to NADH-ubiquinone oxidoreductase MLRQ subunit	304.339	149.318	226.829	1.00709	0.153023	1.95286e-11	1.09509e-10	740.578	88.5343	459.76	6.2804	Y	Y	0	pink
UMAG_15004	KIS68699	probable malate synthase	2667.07	1308.44	1987.76	1.00684	0.152099	1.5024e-11	8.52107e-11	1133.05	109.694	701.682	121.332	N	N	1	dark-green
UMAG_11258	KIS70931	related to GIS2 - Putative zinc finger protein	616.435	304.214	460.325	1.00552	0.122608	1.01011e-16	9.13909e-16	776.815	63.5279	484.863	40.9278	Y	Y	0	yellow
UMAG_10664	KIS68194	hypothetical protein	313.957	151.025	232.491	1.00543	0.234348	7.21483e-06	2.12046e-05	123.337	16.0852	75.7507	26.7332	Y	Y	0.5	beige
UMAG_06294	KIS70206	related to RPN14 û proteasome-interacting protein involved in the assembly of the 19S proteasome	261.53	128.623	195.076	1.00523	0.143096	9.14076e-13	5.91676e-12	106.023	6.84941	66.1758	5.46413	Y	Y	0	yellow
UMAG_04961	KIS67092	hypothetical protein	771.694	376.362	574.028	1.00343	0.190309	5.57268e-08	2.14794e-07	83.2144	16.2563	51.5597	11.7688	N	Y	2	magenta
UMAG_03061	KIS69083	related to TFG2 - TFIIF subunit (transcription initiation factor)	136.839	66.9688	101.904	1.00129	0.180899	1.31015e-08	5.45333e-08	70.9271	7.68658	44.0267	6.68918	Y	Y	6	salmon
UMAG_10625	KIS71025	probable ribosomal protein L24.e.A	986.442	485.523	735.983	1.00061	0.157209	8.23955e-11	4.35221e-10	1426.77	231.457	888.833	117.763	Y	Y	0	yellow
UMAG_10711	KIS67174	probable ribosomal protein S3aE	1762.64	859.004	1310.82	1.00041	0.200313	2.39225e-07	8.47255e-07	1510.02	283.484	930.824	209.455	Y	Y	0	yellow
UMAG_10634	KIS69140	hypothetical protein	21.792	9.79469	15.7933	0.9991	0.413293	0.00586577	0.0107803	38.1136	17.9264	22.0911	4.03795	Y	Y	1	dark-green
UMAG_10246	KIS71449	probable ARC18 - subunit of the Arp2/3 complex	205.611	101.501	153.556	0.998648	0.150109	1.23223e-11	7.06948e-11	257.305	13.4416	160.755	11.0642	Y	Y	0	pink
UMAG_05402	KIS66409	related to DOA1 - involved in ubiquitin-dependent proteolysis	197.181	95.8877	146.534	0.998499	0.217296	1.78709e-06	5.75217e-06	84.7684	13.3196	52.026	15.5551	N	Y	4	magenta
UMAG_03965	KIS67914	related to FAD1 û flavin adenine dinucleotide synthetase	255.652	125.781	190.716	0.996485	0.170244	2.05053e-09	9.32188e-09	157.315	10.4133	98.5232	20.7862	Y	Y	0	yellow
UMAG_10698	KIS66762	related to NEFA-interacting nuclear protein NIP30	51.6019	24.8345	38.2182	0.996329	0.253188	3.4777e-05	9.19228e-05	54.8434	2.63443	33.1986	7.23321	Y	Y	4	light-cyan
UMAG_10863	KIS66220	related to RAI1 - Rat1p Interacting Protein	127.592	62.6084	95.1001	0.996043	0.190853	7.58424e-08	2.8568e-07	56.3866	5.95909	34.8603	5.33291	Y	Y	8	salmon
UMAG_10898	KIS66232	related to short-chain alcohol dehydrogenase	1604.38	795.871	1200.13	0.995148	0.13593	1.05007e-13	7.34935e-13	1247.86	167.514	782.809	35.7822	Y	Y	0	yellow
UMAG_02151	KIS69616	related to 2	657.841	326.29	492.066	0.994601	0.139632	4.50785e-13	2.98981e-12	514.598	71.7859	322.137	20.6072	Y	Y	0.5	dark-green
UMAG_06489	KIS65650	hypothetical protein	239.473	118.118	178.796	0.994346	0.170232	2.20263e-09	9.97824e-09	203.975	21.5855	127.523	21.2316	Y	Y	2	green-yellow
UMAG_11470	KIS69573	hypothetical protein	199.71	98.5207	149.116	0.993804	0.172332	3.4367e-09	1.52166e-08	219.595	26.8452	137.13	20.3871	Y	Y	0	yellow
UMAG_00176	KIS71741	probable SAC1 - recessive suppressor of secretory defect	409.963	202.862	306.412	0.993725	0.151745	2.49677e-11	1.38092e-10	136.561	1.97544	85.8593	17.3574	Y	Y	0	green
UMAG_02094	KIS69557	hypothetical protein	70.3098	34.1441	52.227	0.993409	0.230634	6.98129e-06	2.05838e-05	59.2785	9.20011	36.7267	4.23992	Y	Y	0	burlywood
UMAG_03655	KIS68072	related to VTC1 û subunit of the vacuolar transporter chaperone complex	260.083	128.139	194.111	0.993054	0.180664	1.63371e-08	6.73071e-08	254.746	18.0744	158.539	36.1506	Y	Y	4	green-yellow
UMAG_06195	KIS65815	related to EMG1 - Protein required for ribosome biogenesis	171.938	84.7396	128.339	0.991712	0.18544	3.76767e-08	1.48229e-07	98.6422	12.6205	61.5019	7.68746	Y	Y	2	light-green
UMAG_02226	KIS69697	hypothetical protein	163.275	80.2614	121.768	0.990759	0.199704	2.94635e-07	1.03499e-06	72.6133	12.8351	44.9751	7.28644	N	Y	12	cyan
UMAG_11938	KIS69025	hypothetical protein	794.217	395.209	594.713	0.98828	0.14467	3.55355e-12	2.14596e-11	1444.3	155.272	909.73	72.0546	Y	Y	0.5	light-cyan
UMAG_01006	KIS71095	hypothetical protein	1424.85	705.564	1065.21	0.986469	0.175918	8.73612e-09	3.70797e-08	1205.7	241.083	754.331	116.281	Y	Y	0.5	dark-green
UMAG_10546	KIS66257	probable histone 3	67.2366	32.8499	50.0433	0.986464	0.233291	9.96495e-06	2.8639e-05	81.3576	9.07199	50.2122	8.18245	Y	Y	2	light-green
UMAG_03873	KIS67816	probable FUR1 - uracil phosphoribosyltransferase	321.906	160.821	241.363	0.985819	0.131771	3.21777e-14	2.4227e-13	310.748	11.6531	196.933	11.9763	Y	Y	0.5	burlywood
UMAG_10014	KIS71623	related to HMF1 - Heat-shock induceable Inhibitor of cell Growth	298.972	148.804	223.888	0.985775	0.152888	4.9177e-11	2.64957e-10	506.288	62.5653	319.963	19.6629	Y	Y	2	yellow
UMAG_05062	KIS67196	related to SNF7 protein	309.075	152.733	230.904	0.985641	0.191224	1.07688e-07	3.99679e-07	306.219	43.79	190.802	34.1555	Y	Y	0	burlywood
UMAG_11339	KIS71537	related to Siderophore iron transporter 3	2257.3	1105.81	1681.56	0.985633	0.221375	3.54634e-06	1.09144e-05	767.355	120.156	478.396	159.316	Y	Y	0	burlywood
UMAG_05179	KIS70107	probable MVD1 - mevalonate pyrophosphate decarboxylase	867.15	435.232	651.191	0.98424	0.109476	1.07267e-19	1.2622e-18	453.868	21.3298	288.353	3.27913	Y	Y	0	yellow
UMAG_05252	KIS66252	probable nadp-dependent mannitol dehydrogenase	54.1852	26.3673	40.2762	0.983009	0.253326	4.39891e-05	0.000114538	44.2808	8.59361	27.2243	1.6291	Y	Y	1	red
UMAG_01081	KIS71172	related to AOS1 - Smt3p activating protein	152.511	75.8524	114.182	0.981458	0.171534	4.59858e-09	1.99911e-08	85.5665	8.69831	53.8112	6.21136	Y	Y	0	yellow
UMAG_01992	KIS70845	related to amidohydrolase	211.266	105.141	158.203	0.980795	0.175101	9.1664e-09	3.88549e-08	91.7786	3.81845	57.7905	11.7507	Y	Y	0	burlywood
UMAG_11685	KIS70412	hypothetical protein	82.6865	40.7233	61.7049	0.980429	0.217176	2.72571e-06	8.52278e-06	69.5235	11.5706	43.2146	5.11667	Y	Y	0	yellow
UMAG_12021	KIS66975	hypothetical protein	150.307	73.8437	112.075	0.979519	0.226274	6.35787e-06	1.88749e-05	157.166	41.5095	98.4018	12.498	Y	Y	0	dark-green
UMAG_05212	KIS70140	related to YPT31 - GTP-binding protein of the rab family	212.517	105.432	158.975	0.97916	0.186718	6.81e-08	2.59543e-07	136.723	17.5226	86.5628	19.0947	Y	Y	0.5	light-cyan
UMAG_11502	KIS68923	probable dUTP pyrophosphatase	79.813	39.192	59.5025	0.978922	0.228622	7.94853e-06	2.31817e-05	86.2088	15.9028	53.8283	8.10687	Y	Y	0	yellow
UMAG_02273	KIS69751	hypothetical protein	361.705	178.386	270.045	0.978317	0.216663	2.67699e-06	8.37451e-06	147.531	26.5446	92.2497	26.0309	Y	Y	12	light-cyan
UMAG_06019	KIS65932	probable CMK1 - Ca2 /calmodulin-dependent ser/thr protein kinase type I	213.596	105.965	159.78	0.977927	0.188637	9.43428e-08	3.52053e-07	112.482	10.308	71.008	18.5247	Y	Y	8	light-cyan
UMAG_03959	KIS67908	probable t-complex-type molecular chaperone	1575.51	786.752	1181.13	0.976415	0.170223	4.18488e-09	1.83408e-08	651.885	69.6173	408.834	73.3321	Y	Y	0	yellow
UMAG_01311	KIS71413	related to NADH-ubiquinone oxidoreductase B16.6 subunit	323.339	161.563	242.451	0.975971	0.171027	4.99607e-09	2.16463e-08	574.524	91.2505	362.727	27.6457	Y	Y	0	yellow
UMAG_03464	KIS68370	hypothetical protein	80.332	39.6142	59.9731	0.975192	0.220139	4.09664e-06	1.24714e-05	39.2053	5.18751	24.5409	4.36508	N	Y	4	cyan
UMAG_11955	KIS68687	probable MSW1 - tryptophanyl-tRNA synthetase	200.223	99.7579	149.99	0.973608	0.185321	6.51513e-08	2.48745e-07	105.048	14.9768	66.6471	13.8142	Y	Y	0	yellow
UMAG_11319	KIS71490	probable SEC14 - phosphatidylinositol(PI)/phosphatidylcholine(PC) transfer protein	1085.62	540.153	812.888	0.973424	0.194496	2.40195e-07	8.50226e-07	728.965	195.413	460.236	43.1961	Y	Y	2	light-green
UMAG_01514	KIS70344	Dual specificity protein kinase FUZ7	535.983	268.427	402.205	0.973214	0.165129	1.65125e-09	7.59222e-09	275.15	38.5807	175.298	29.5911	Y	Y	2	red
UMAG_03340	KIS68774	probable NHP2 - nucleolar rRNA processing protein	309.281	155.103	232.192	0.971367	0.167855	3.08464e-09	1.37806e-08	314.652	32.9834	199.341	27.3525	Y	Y	0	yellow
UMAG_01246	KIS71346	related to DCN1 - scaffold-type E3 ligase	280.579	140.202	210.391	0.971301	0.182542	4.50068e-08	1.75782e-07	196.201	28.4222	124.365	21.9257	Y	Y	0	yellow
UMAG_03377	KIS68813	hypothetical protein	69.0645	33.8037	51.4341	0.971029	0.251926	4.97114e-05	0.000128198	26.216	4.46643	16.2545	5.03777	Y	Y	2	cyan
UMAG_11161	KIS67047	probable MDH1 - malate dehydrogenase precursor	3282.54	1649.99	2466.27	0.970754	0.15543	1.83725e-10	9.38975e-10	2213.19	404.231	1406.96	64.9243	Y	Y	0.5	dark-green
UMAG_05357	KIS66359	related to SSZ1 - regulator protein involved in pleiotropic drug resistance	1083.44	548.368	815.902	0.970152	0.118487	1.18114e-16	1.05389e-15	422.908	25.6678	270.769	17.5443	Y	Y	0	yellow
UMAG_04544	KIS67446	hypothetical protein	534.767	269.071	401.919	0.969674	0.154008	1.34158e-10	6.9222e-10	311.526	27.8253	198.777	36.8255	Y	Y	2	red
UMAG_03252	KIS68680	probable 26S proteasome non-ATPase regulatory subunit p58	1490.19	750.841	1120.51	0.967953	0.153955	1.41928e-10	7.30561e-10	555.147	68.872	353.73	57.1455	Y	Y	0	yellow
UMAG_10051	KIS71763	probable 60S ribosomal protein L31	611.368	305.381	458.374	0.967754	0.194856	2.96003e-07	1.03923e-06	1066.76	213.999	676.508	132.097	Y	Y	0	yellow
UMAG_10746	KIS66470	hypothetical protein	83.6927	41.4447	62.5687	0.967641	0.221051	5.27088e-06	1.57931e-05	69.6269	9.73241	43.97	9.82652	Y	Y	0	burlywood
UMAG_04294	KIS67800	related to peroxin-11	489.985	248.206	369.095	0.967582	0.125146	4.66032e-15	3.72135e-14	440.596	21.8627	282.815	20.0318	Y	Y	12	light-cyan
UMAG_03164	KIS68592	probable platelet-activating factor acetylhydrolase ib alpha subunit	188.689	95.2143	141.951	0.966306	0.156518	2.96194e-10	1.48557e-09	93.1493	6.3329	59.4418	4.68379	Y	Y	0.5	red
UMAG_06345	KIS70259	probable cysteine synthase	494.335	248.238	371.286	0.966177	0.178556	2.752e-08	1.10422e-07	289.493	50.4021	183.633	20.4583	Y	Y	0	yellow
UMAG_04960	KIS67091	related to 30S ribosomal protein S12	60.0523	29.6904	44.8713	0.966144	0.238914	2.29002e-05	6.26314e-05	79.5929	11.4503	49.5947	5.01047	Y	Y	0	yellow
UMAG_00439	KIS72017	hypothetical protein	81.6312	40.6861	61.1587	0.965009	0.211587	2.24622e-06	7.11302e-06	56.4111	7.95325	35.4089	2.40485	Y	Y	2	green
UMAG_02542	KIS69191	hypothetical protein	252.88	127.807	190.343	0.964645	0.152984	1.27628e-10	6.60108e-10	112.606	9.8929	71.8744	5.21676	Y	Y	2	magenta
UMAG_05472	KIS66478	related to nascent polypeptide-associated complex alpha chain	1409.77	715.72	1062.74	0.964395	0.124628	4.51022e-15	3.60594e-14	1652.8	102.594	1062.21	97.5954	Y	Y	0	yellow
UMAG_05210	KIS70138	hypothetical protein	75.4812	37.5489	56.515	0.963892	0.220334	5.35201e-06	1.60213e-05	52.57	5.88735	33.222	5.63097	Y	Y	0	yellow
UMAG_06497	KIS69484	hypothetical protein	21.036	9.77019	15.4031	0.96359	0.394052	0.00580357	0.0106782	36.5045	10.1322	21.5573	8.09288	Y	Y	0.5	red
UMAG_04542	KIS67444	probable ubiquitin--protein ligase hus5	89.0742	44.4589	66.7665	0.963295	0.208445	1.68714e-06	5.45492e-06	124.424	16.8409	78.8366	9.18366	Y	Y	0	yellow
UMAG_10273	KIS70760	related to delta3	206.159	104.109	155.134	0.96217	0.16301	1.59957e-09	7.37558e-09	162.43	22.2109	103.95	5.60804	Y	Y	0	beige
UMAG_10128	KIS69833	related to snRNP protein	155.528	77.8467	116.688	0.961146	0.206367	1.40411e-06	4.59267e-06	235.324	51.2635	148.94	20.68	Y	Y	0	pink
UMAG_02521	KIS69170	hypothetical protein	93.9395	46.9274	70.4334	0.960487	0.207183	1.58612e-06	5.14892e-06	48.49	5.00966	31.0029	6.47596	Y	Y	4	magenta
UMAG_10114	KIS72014	probable 40S ribosomal protein S16	985.437	499.076	742.256	0.960411	0.153193	1.60381e-10	8.24235e-10	1542.85	184.309	991.146	143.265	Y	Y	0	yellow
UMAG_10667	KIS68207	related to SPN1 - Spt6-interacting putative elongation factor	464.673	235.886	350.279	0.956131	0.15806	6.51782e-10	3.15631e-09	250.522	38.6138	160.946	21.4542	Y	Y	0	yellow
UMAG_12012	KIS67114	hypothetical protein	40.7944	19.8164	30.3054	0.956066	0.307486	0.000796439	0.0016969	34.2229	7.74968	21.0169	6.24911	Y	Y	0	green
UMAG_04604	KIS67508	hypothetical protein	338.591	172.407	255.499	0.955229	0.143498	1.27033e-11	7.28155e-11	169.974	8.06514	110.022	16.014	Y	Y	8	cyan
UMAG_10654	KIS68762	related to TFB5 - component of general transcription and DNA repair factor TFIIH	21.7971	10.1211	15.9591	0.955144	0.416904	0.00864283	0.0153429	74.1028	34.6704	43.3532	8.47256	Y	Y	0.5	green
UMAG_05031	KIS67164	probable ribosomal protein L10a.e	1517.1	764.231	1140.66	0.955024	0.195829	4.74905e-07	1.63272e-06	1563.81	175.165	1000.64	280.162	Y	Y	0	yellow
UMAG_00632	KIS72217	hypothetical protein	99.8228	50.2495	75.0361	0.953886	0.202949	1.16389e-06	3.84394e-06	73.9635	9.17943	47.1792	6.48887	Y	Y	4	magenta
UMAG_10772	KIS70217	hypothetical protein	176.457	87.1272	131.792	0.953756	0.269219	0.000169186	0.000398884	415.388	150.343	260.085	19.8389	Y	Y	2	light-green
UMAG_04219	KIS67719	hypothetical protein	103.985	52.0791	78.0319	0.953191	0.21513	4.20351e-06	1.27727e-05	60.4135	8.59979	38.5535	10.6462	Y	Y	8	beige
UMAG_12293	KIS67133	related to PPM1 û carboxyl methyltransferase	130.452	65.755	98.1035	0.952479	0.199935	8.48631e-07	2.84935e-06	56.1481	11.2833	35.9272	4.04563	Y	Y	4	cyan
UMAG_05658	KIS66872	hypothetical protein	87.5339	43.3105	65.4222	0.952466	0.265366	0.000142891	0.00034087	37.4058	8.87742	23.6172	6.34269	Y	Y	4	cyan
UMAG_06020	KIS65933	hypothetical protein	99.0993	49.8364	74.4678	0.952115	0.213022	3.48409e-06	1.07382e-05	82.0996	13.04	52.7202	8.67203	Y	Y	12	light-cyan
UMAG_03776	KIS68197	hypothetical protein	1093.04	542.496	817.77	0.951574	0.257748	9.54291e-05	0.000235654	402	38.5634	251.515	108.492	Y	Y	0	burlywood
UMAG_00647	KIS72232	hypothetical protein	48.7641	24.1097	36.4369	0.950866	0.267873	0.00016929	0.000398983	22.8948	2.52518	14.4499	3.99749	N	Y	2	yellow
UMAG_03495	KIS68404	probable PNO1 protein	253.371	129.292	191.332	0.949426	0.158264	8.96565e-10	4.27125e-09	180.7	23.0093	116.364	7.26449	Y	Y	2	green-yellow
UMAG_04324	KIS67218	probable POX1 - acyl-CoA oxidase	713.298	360.293	536.796	0.948676	0.204031	1.47186e-06	4.80699e-06	222.687	24.8191	142.017	42.2735	Y	Y	0.5	dark-green
UMAG_05598	KIS66610	probable NADH dehydrogenase (ubiquinone) 22K chain precursor	279.152	141.795	210.474	0.948553	0.182696	9.32665e-08	3.48468e-07	410.624	73.6785	263.976	27.7216	Y	Y	0	yellow
UMAG_11422	KIS71785	hypothetical protein	155.545	78.0677	116.807	0.948085	0.226985	1.30782e-05	3.70063e-05	36.803	7.01746	23.478	6.71638	N	Y	0	yellow
UMAG_10973	KIS65869	probable glutathione-dependent formaldehyde dehydrogenase	3388.67	1731.83	2560.25	0.94746	0.140374	5.31507e-12	3.15292e-11	2007.11	270.106	1298.53	107.389	Y	Y	0.5	dark-green
UMAG_06194	KIS65814	related to NPY1 - NADH diphosphatase	183.286	93.0926	138.189	0.947399	0.180701	7.18042e-08	2.72535e-07	81.9636	12.931	52.8817	9.04808	Y	Y	0	pink
UMAG_10362	KIS69047	hypothetical protein	150.67	76.6262	113.648	0.947375	0.179591	6.01372e-08	2.30619e-07	284.085	46.723	182.909	7.48928	Y	Y	0.5	green
UMAG_04562	KIS67463	probable aspartate aminotransferase	1154.69	594.198	874.442	0.946384	0.119255	9.76853e-16	8.10073e-15	612.113	61.5251	398.274	14.9476	Y	Y	1	red
UMAG_05567	KIS66579	probable ATG8 - essential for autophagy	223.303	114.183	168.743	0.945966	0.154863	4.68993e-10	2.30395e-09	420.423	33.3596	273.093	36.1617	Y	Y	8	light-cyan
UMAG_11702	KIS69799	hypothetical protein	235.159	118.885	177.022	0.945545	0.208214	2.49689e-06	7.84909e-06	89.178	14.616	57.2785	15.586	Y	Y	0.5	beige
UMAG_01699	KIS70529	hypothetical protein	413.682	211.89	312.786	0.944463	0.153357	3.34469e-10	1.66976e-09	194.903	20.5986	126.347	20.4669	Y	Y	8	magenta
UMAG_03018	KIS69039	related to BCP1 - Essential protein involved in nuclear export of cytoskeleton organization protein	206.687	104.766	155.727	0.943069	0.208335	2.67293e-06	8.36584e-06	137.736	30.4424	88.2675	14.0526	Y	Y	0.5	burlywood
UMAG_10375	KIS69106	related to HRB1 - Poly(A ) RNA-binding protein	900.025	462.355	681.19	0.94035	0.152612	3.29541e-10	1.64643e-09	392.005	62.0921	255.077	33.9365	Y	Y	0	burlywood
UMAG_01869	KIS70713	related to NADH oxidase	204.402	104.68	154.541	0.940071	0.170741	1.68268e-08	6.90604e-08	84.7329	14.8425	54.735	3.34703	Y	Y	0	pink
UMAG_04300	KIS67806	related to protein involved in the assembly of the mitochondrial succinate dehydrogenase complex	41.5752	20.6681	31.1216	0.939576	0.284722	0.000424563	0.000944774	73.5023	15.3146	46.0446	5.54997	Y	Y	4	cyan
UMAG_02967	KIS68988	probable YNK1 - nucleoside diphosphate kinase	769.701	396.776	583.238	0.938052	0.142883	2.38894e-11	1.32468e-10	769.129	71.0245	502.185	57.0289	Y	Y	0	yellow
UMAG_11827	KIS72246	probable RPS6B - 40s ribosomal protein S6	1353.52	693.47	1023.5	0.93712	0.17709	5.51542e-08	2.12714e-07	1241.19	192.985	805.633	146.376	Y	Y	0	yellow
UMAG_04632	KIS67533	probable ribosomal protein P2	634.023	324.325	479.174	0.937046	0.184954	1.84547e-07	6.60117e-07	1267.04	244.348	820.837	123.173	Y	Y	0	yellow
UMAG_01139	KIS71235	related to MRM2 - mitochondrial rRNA methyl transferase	51.3545	25.7611	38.5578	0.936979	0.250822	8.47125e-05	0.00021211	44.4523	6.94513	28.321	4.60213	Y	Y	0.5	dark-green
UMAG_01441	KIS71548	hypothetical protein	91.0895	44.8758	67.9827	0.936574	0.313089	0.00118083	0.002452	66.7559	19.5539	41.2448	16.7785	Y	Y	12	light-cyan
UMAG_11584	KIS66997	related to 50S ribosomal protein L22	268.051	138.592	203.321	0.935064	0.13762	5.07629e-12	3.0196e-11	199.847	16.7123	130.618	5.47997	Y	Y	0	yellow
UMAG_11374	KIS70810	hypothetical protein	279.634	143.744	211.689	0.934787	0.168372	1.30305e-08	5.42863e-08	158.275	28.4103	102.914	9.26906	Y	Y	0.5	dark-green
UMAG_03285	KIS68718	hypothetical protein	195.702	100.004	147.853	0.934517	0.193374	6.17224e-07	2.09967e-06	47.502	7.92165	30.8733	6.83548	N	Y	4	cyan
UMAG_11290	KIS67864	related to SNX4 - Sorting NeXin	786.988	402.612	594.8	0.933508	0.193431	6.35653e-07	2.15781e-06	353.101	42.3938	229.636	65.992	Y	Y	0.5	light-cyan
UMAG_03544	KIS68457	related to SEC14 - phosphatidylinositol/phosphatidylcholine transfer protein	438.638	227.205	332.921	0.933333	0.134103	1.58573e-12	9.92616e-12	219.779	23.3478	144.296	6.77692	Y	Y	12	beige
UMAG_01266	KIS71365	hypothetical protein	234.436	120.193	177.314	0.933272	0.182349	1.42391e-07	5.1793e-07	81.5203	17.2434	52.9744	8.66938	Y	Y	0	beige
UMAG_05204	KIS70132	hypothetical protein	270.587	136.283	203.435	0.93321	0.252523	9.70213e-05	0.000239207	235.6	105.045	149.558	15.8603	Y	Y	0	yellow
UMAG_10615	KIS70987	probable VPS21 - Rab5-like GTPase involved in vacuolar protein sorting	710.624	369.252	539.938	0.931314	0.124333	3.20143e-14	2.41321e-13	583.443	48.9863	383.01	15.0012	Y	Y	0.5	red
UMAG_05906	KIS66166	probable Arp2/3 protein complex subunit sop2	994.943	516.139	755.541	0.930863	0.135285	2.78396e-12	1.69504e-11	518.552	63.9968	340.718	33.9239	Y	Y	6	light-green
UMAG_04148	KIS67644	related to MRPS28 - mitochondrial ribosomal protein	326.291	168.368	247.329	0.930499	0.16997	2.01861e-08	8.22727e-08	211.494	28.336	137.318	17.191	Y	Y	0	yellow
UMAG_03517	KIS68428	hypothetical protein	92.9548	47.5269	70.2408	0.930197	0.202517	2.02451e-06	6.45845e-06	79.6532	12.0907	51.6159	6.28437	Y	Y	12	light-cyan
UMAG_11892	KIS70503	probable PHO85 - cyclin-dependent protein kinase	140.434	72.2735	106.354	0.929689	0.18048	1.2051e-07	4.43335e-07	96.3893	10.8886	62.997	8.69701	Y	Y	1	dark-green
UMAG_04644	KIS67548	related to 1-phosphatidylinositol phosphodiesterase precursor	100.895	51.3505	76.1228	0.929152	0.229389	2.31501e-05	6.32077e-05	41.5364	8.60864	26.6202	5.87151	N	N	12	beige
UMAG_10180	KIS70065	related to ATP17 - ATP synthase complex	643.01	332.66	487.835	0.927817	0.163125	5.96623e-09	2.56946e-08	1250.83	206.405	818.526	56.2969	Y	Y	0	yellow
UMAG_01110	KIS71202	related to serine-protein kinase atr	652.886	334.655	493.771	0.927641	0.202673	2.15636e-06	6.84525e-06	55.4285	6.80372	36.1144	10.667	N	Y	6	magenta
UMAG_10445	KIS68361	hypothetical protein	379.274	196.887	288.081	0.927597	0.143355	4.58258e-11	2.48351e-10	152.97	17.3862	100.601	11.6683	Y	Y	0.5	magenta
UMAG_00985	KIS71074	hypothetical protein	120.623	62.1321	91.3775	0.92754	0.1808	1.35756e-07	4.96311e-07	62.4253	6.12813	40.7107	3.8973	Y	Y	0	pink
UMAG_03402	KIS68303	Indole-3-acetaldehyde dehydrogenase	68.5114	34.7813	51.6463	0.926595	0.234808	3.66013e-05	9.63115e-05	31.7133	4.51731	20.5412	4.69452	Y	Y	0.5	dark-green
UMAG_01577	KIS70410	hypothetical protein	222.884	115.517	169.201	0.926516	0.155545	1.21117e-09	5.67378e-09	135.104	13.1731	88.7306	11.1552	Y	Y	0.5	beige
UMAG_10283	KIS69261	related to MTD1 - methylenetetrahydrofolate dehydrogenase (NAD )	471.194	244.716	357.955	0.925494	0.149341	2.67314e-10	1.347e-09	259.196	36.0203	170.211	21.1225	Y	Y	2	green-yellow
UMAG_05828	KIS66087	probable tubulin beta chain	6451.39	3374.54	4912.97	0.925	0.0984856	2.36635e-21	3.18472e-20	3221.01	164.732	2131.32	114.858	Y	Y	2	yellow
UMAG_10136	KIS69850	related to vacuolar protein-sorting protein VPS35	974.136	508.845	741.49	0.92482	0.118174	2.38229e-15	1.93336e-14	189.596	12.4365	125.44	9.31818	Y	Y	0	pink
UMAG_10064	KIS69639	probable glucokinase	1088.9	566.457	827.677	0.924431	0.144493	7.42813e-11	3.95042e-10	513.303	45.4435	338.967	53.3242	Y	Y	0	yellow
UMAG_10810	KIS70371	probable RPN11 - 26S proteasome regulatory subunit	811.898	424.927	618.412	0.923623	0.111422	5.49798e-17	5.1251e-16	582.655	26.9159	386.336	13.0604	Y	Y	0	pink
UMAG_01115	KIS71210	related to OSH3 - Member of oxysterol-binding protein family	1976.15	1023.83	1499.99	0.922633	0.173434	4.86532e-08	1.89176e-07	615.328	63.874	401.722	82.104	Y	Y	1	burlywood
UMAG_10903	KIS67466	probable RPN7 - subunit of the regulatory particle of the proteasome	1128.22	590.388	859.302	0.922011	0.120056	7.52982e-15	5.9176e-14	643.054	22.1987	425.272	33.7259	Y	Y	0	yellow
UMAG_02551	KIS69201	hypothetical protein	220.427	114.26	167.343	0.920658	0.175106	6.85618e-08	2.60996e-07	66.6977	9.48336	44.0733	6.78647	Y	Y	2	cyan
UMAG_03306	KIS68738	probable PRS4 - ribose-phosphate pyrophosphokinase 3	273.186	142.252	207.719	0.919676	0.15582	1.70034e-09	7.81238e-09	133.509	17.0131	88.0669	10.8767	Y	Y	0	yellow
UMAG_05645	KIS66859	related to VTI1 - v-SNARE	209.764	109.254	159.509	0.919064	0.160171	4.52812e-09	1.97114e-08	208.831	26.8	137.78	3.40875	Y	Y	8	beige
UMAG_04128	KIS67624	related to isopenicillin N epimerase	146.341	75.5948	110.968	0.917414	0.2041	3.23226e-06	1.0005e-05	70.5128	8.41943	45.9926	11.4914	Y	Y	0	burlywood
UMAG_04833	KIS66771	probable isovaleryl-CoA dehydrogenase	385.922	202.302	294.112	0.917129	0.129458	6.65267e-13	4.35864e-12	203.814	17.3439	135.106	9.4402	Y	Y	0	beige
UMAG_01463	KIS70288	probable SUI2 - translation initiation factor eIF-2 alpha chain	748.915	393.949	571.432	0.916162	0.111873	1.25731e-16	1.12031e-15	561.264	33.3043	373.489	6.80155	Y	Y	0	yellow
UMAG_11673	KIS70319	hypothetical protein	427.79	223.392	325.591	0.916064	0.159259	4.22197e-09	1.84783e-08	175.221	21.4045	115.735	12.651	Y	Y	12	blue
UMAG_10872	KIS70599	related to YSA1 - sugar-nucleotide hydrolase	136.073	70.3746	103.224	0.914606	0.204211	3.51525e-06	1.08239e-05	141.379	26.4354	92.8959	18.3653	Y	Y	4	salmon
UMAG_10196	KIS70117	probable 60S large subunit ribosomal protein L27	536.029	277.62	406.825	0.91357	0.201206	2.61778e-06	8.2012e-06	874.571	151.512	574.403	135.925	Y	Y	0	yellow
UMAG_06421	KIS65721	hypothetical protein	810.778	426.987	618.883	0.913352	0.11633	1.95323e-15	1.59316e-14	294.694	15.8886	196.132	11.138	Y	Y	0	yellow
UMAG_05674	KIS66889	probable NUC1 - dna/rna non-specific nuclease	576.692	300.423	438.557	0.912065	0.180201	1.96428e-07	7.0029e-07	353.571	27.2568	233.566	52.4521	Y	Y	0	burlywood
UMAG_10139	KIS69867	probable pantoate--beta-alanine ligase	127.08	66.1073	96.5936	0.911974	0.182441	2.75837e-07	9.71066e-07	65.565	7.59792	43.3876	6.07053	Y	Y	0	yellow
UMAG_05058	KIS67192	hypothetical protein	553.63	291.189	422.41	0.910538	0.137799	1.8784e-11	1.05426e-10	861.404	76.4867	573.256	60.3317	Y	Y	2	yellow
UMAG_01194	KIS71294	hypothetical protein	957.397	499.497	728.447	0.910421	0.177503	1.35608e-07	4.96052e-07	359.61	19.9561	238.005	60.9148	Y	Y	0.5	light-cyan
UMAG_01714	KIS70546	probable monooxygenase	335.335	175.751	255.543	0.910407	0.152875	1.25185e-09	5.84316e-09	154.492	14.9635	102.841	20.0041	Y	Y	0.5	dark-green
UMAG_01087	KIS71178	probable SCF complex member Cullin 1	393.865	205.821	299.843	0.909791	0.168933	3.44378e-08	1.364e-07	109.36	8.3478	72.7749	18.7461	Y	Y	0	yellow
UMAG_02001	KIS70856	related to hydroxymethylglutaryl-CoA lyase	55.2281	28.2417	41.7349	0.909665	0.2557	0.000173615	0.000408579	35.0077	7.40994	22.7253	4.10919	Y	Y	0	burlywood
UMAG_01176	KIS71276	hypothetical protein	227.795	119.592	173.693	0.907763	0.159783	6.40845e-09	2.74891e-08	131.45	19.8588	86.8826	1.34293	Y	Y	12	cyan
UMAG_11985	KIS67407	related to TPM2 - tropomyosin	1628.95	856.801	1242.87	0.906512	0.151991	1.17759e-09	5.52534e-09	2254.35	339.117	1502.61	228.053	Y	Y	2	light-green
UMAG_10776	KIS70232	related to GCD2 - translation initiation factor eIF2B	528.35	278.768	403.559	0.905466	0.14146	7.42997e-11	3.95042e-10	217.382	28.9767	144.865	6.52677	Y	Y	2	yellow
UMAG_10793	KIS71089	hypothetical protein	67.2604	34.4681	50.8643	0.905439	0.249836	0.000135869	0.000325441	51.9111	10.9039	34.0338	9.88885	Y	Y	0	beige
UMAG_01510	KIS70340	hypothetical protein	124.751	65.1462	94.9487	0.905044	0.186835	6.12252e-07	2.08495e-06	56.7516	3.07373	37.7792	7.60892	Y	Y	0	yellow
UMAG_04794	KIS66730	probable SUA7 - TFIIB subunit (transcription initiation factor)	682.926	360.82	521.873	0.904833	0.132388	3.96976e-12	2.38555e-11	406.471	35.3278	272.732	29.1748	Y	Y	4	magenta
UMAG_10870	KIS70588	related to Glucose-6-phosphate 1-epimerase	780.726	408.153	594.439	0.903844	0.190814	1.02274e-06	3.39512e-06	549.391	131.161	362.85	30.4415	Y	Y	12	salmon
UMAG_02077	KIS69539	hypothetical protein	118.823	61.4967	90.1596	0.90347	0.22674	3.18997e-05	8.49082e-05	49.7827	5.95731	32.8351	10.2063	Y	Y	0.5	light-cyan
UMAG_03618	KIS68531	related to THI21 - Hydroxymethylpyrimidine phosphate kinase	239.22	125.622	182.421	0.903419	0.169289	4.57359e-08	1.78414e-07	83.3093	12.7462	55.6259	7.13733	Y	Y	0	yellow
UMAG_02168	KIS69634	related to Prk1p	283.364	149.208	216.286	0.903354	0.157372	4.57502e-09	1.99021e-08	141.546	6.75957	94.7333	16.7521	Y	Y	2	yellow
UMAG_01905	KIS70750	probable ubiquitin thiolesterase L3	199.209	104.782	151.995	0.903233	0.163759	1.68046e-08	6.90131e-08	185.368	27.8314	123.267	9.9086	Y	Y	8	salmon
UMAG_01702	KIS70532	hypothetical protein	15.658	7.35414	11.5061	0.901131	0.44786	0.0185069	0.0307418	20.295	6.85482	12.0977	4.79032	Y	Y	12	dark-green
UMAG_02955	KIS68976	related to RAY38 protein	1044.5	554.24	799.371	0.900242	0.12762	8.45975e-13	5.50353e-12	793.559	67.6382	532.005	40.5654	Y	Y	0	yellow
UMAG_02903	KIS68918	related to RPC25 - DNA-direcred RNA polymerase III	114.25	59.2863	86.768	0.899561	0.229756	4.2622e-05	0.000111248	102.411	11.9982	67.4529	20.6129	Y	Y	0	burlywood
UMAG_02290	KIS69768	hypothetical protein	220.223	116.019	168.121	0.899425	0.171909	8.08865e-08	3.03651e-07	246.576	26.9689	164.643	21.732	Y	Y	0	yellow
UMAG_10687	KIS66720	probable VPS28 - protein involved in vacuolar traffic	65.464	34.0167	49.7404	0.899292	0.228404	3.9286e-05	0.000102998	64.2361	7.07797	42.1951	6.20454	Y	Y	8	salmon
UMAG_10307	KIS69329	hypothetical protein	267.201	140.939	204.07	0.898964	0.162969	1.6851e-08	6.91158e-08	170.441	16.6415	114.356	20.5819	Y	Y	2	red
UMAG_03307	KIS68739	related to 5-formyltetrahydrofolate cyclo-ligase	90.0786	47.1316	68.6051	0.898714	0.201913	4.12592e-06	1.25546e-05	79.148	10.2812	52.6836	3.35022	Y	Y	0	yellow
UMAG_11937	KIS69024	probable APS1 - AP-1 complex subunit	138.058	71.7419	104.9	0.89829	0.222277	2.5365e-05	6.87612e-05	192.07	20.8487	127.293	42.3702	Y	Y	4	salmon
UMAG_02594	KIS69246	hypothetical protein	111.449	58.3905	84.9196	0.897845	0.198692	2.99432e-06	9.3131e-06	38.6471	5.45185	25.6535	4.77883	N	Y	4	light-cyan
UMAG_11152	KIS67275	related to 2-amino-3-carboxylmuconate-6-semialdehyde decarboxylase	227.669	120.018	173.843	0.897648	0.168739	5.06777e-08	1.96388e-07	126.706	18.611	84.8746	13.3255	Y	Y	8	light-cyan
UMAG_03336	KIS68770	related to UNR-interacting protein STRAP (serine-threonine kinase receptor-associated protein)	231.012	122.288	176.65	0.896838	0.15454	3.1807e-09	1.41804e-08	159.962	16.5903	107.129	10.7292	Y	Y	0.5	magenta
UMAG_04063	KIS68022	related to soluble epoxide hydrolase	141.924	74.5727	108.248	0.89649	0.184341	5.64479e-07	1.93041e-06	80.3235	7.85894	53.8383	11.007	Y	Y	0	beige
UMAG_00864	KIS70939	probable ZUO1 - zuotin	608.675	323.323	465.999	0.89646	0.140232	7.92215e-11	4.19484e-10	298.453	12.1213	199.842	21.4182	Y	Y	0	yellow
UMAG_12001	KIS66702	probable NADH-ubiquinone oxidoreductase 12 kDa subunit	97.2357	50.3318	73.7837	0.896403	0.248603	0.00014597	0.000347573	275.72	80.1632	180.183	21.0805	Y	Y	0	yellow
UMAG_10697	KIS66761	hypothetical protein	3.58836	0.969526	2.27894	0.896396	0.950282	0.0848919	0.121007	1.30031	0.878194	0.428181	0.266098	N	N	12	#N/A
UMAG_01391	KIS71496	related to phosphoprotein phosphatase 2C	218.465	115.518	166.992	0.896128	0.161723	1.46854e-08	6.07866e-08	130.561	2.85753	87.6622	16.1949	Y	Y	8	beige
UMAG_06163	KIS65783	hypothetical protein	62.6313	32.5494	47.5904	0.895785	0.235148	6.65567e-05	0.000168942	66.0892	10.3983	43.117	4.38814	Y	Y	12	beige
UMAG_05090	KIS70016	probable ATP3 - F1F0-ATPase complex	2034.99	1084.59	1559.79	0.894803	0.123397	2.01968e-13	1.37919e-12	1458.04	96.628	979.891	74.5979	Y	Y	0	yellow
UMAG_04288	KIS67793	hypothetical protein	94.1872	49.3617	71.7744	0.894284	0.210095	9.99527e-06	2.87103e-05	69.026	6.27056	45.6128	9.27937	Y	Y	12	light-cyan
UMAG_03763	KIS68183	probable TRR2 - thioredoxin-disulfide reductase (mitochondrial)	512.531	270.091	391.311	0.893809	0.188553	1.01873e-06	3.38528e-06	325.839	36.5907	215.812	43.3396	Y	Y	0	pink
UMAG_02191	KIS69659	hypothetical protein	337.663	178.568	258.115	0.893285	0.171734	9.60452e-08	3.57816e-07	100.476	15.2156	67.3901	12.8543	Y	Y	4	light-cyan
UMAG_10944	KIS71552	related to protein phosphatase methylesterase 1	186.363	98.3742	142.369	0.893247	0.183875	5.7372e-07	1.9589e-06	89.7869	11.2792	59.7048	9.97357	Y	Y	2	yellow
UMAG_01030	KIS71120	hypothetical protein	215.903	113.984	164.944	0.89297	0.176358	2.01456e-07	7.17026e-07	79.8323	11.6819	53.4824	10.3877	Y	Y	0	burlywood
UMAG_04654	KIS67558	related to U2 snRNP protein A`	109.319	57.4217	83.3701	0.892093	0.204963	6.51313e-06	1.92915e-05	99.0569	11.7498	66.0858	11.53	Y	Y	0	yellow
UMAG_11634	KIS72421	related to KAP114 - Member of the karyopherin-beta family	554.772	295.468	425.12	0.891646	0.140628	1.13859e-10	5.91736e-10	114.707	16.9462	77.3162	5.36765	Y	Y	2	yellow
UMAG_03583	KIS68497	related to HIS2 - histidinol-phosphatase	137.815	72.7538	105.284	0.891434	0.180817	4.04787e-07	1.40739e-06	88.8977	9.22861	59.8268	10.5125	Y	Y	0	yellow
UMAG_00215	KIS71783	probable PRO1 - glutamate 5-kinase	250.831	133.543	192.187	0.8906	0.14691	6.63384e-10	3.21009e-09	103.124	5.90855	69.5042	7.92492	Y	Y	4	yellow
UMAG_11052	KIS67973	hypothetical protein	193.253	102.318	147.786	0.890109	0.181626	4.63713e-07	1.59764e-06	278.91	35.5476	186.716	21.363	Y	Y	0	yellow
UMAG_00674	KIS72264	probable FBA1 - fructose-bisphosphate aldolase	5640.31	3021.95	4331.13	0.889989	0.107545	6.2e-17	5.71355e-16	3521.63	276.007	2384.86	57.4288	Y	Y	0	yellow
UMAG_01634	KIS70458	probable RPL19B - 60S large subunit ribosomal protein L19.e	954.614	503.675	729.144	0.889581	0.193636	2.09826e-06	6.68052e-06	1088.92	165.22	727.948	171.137	Y	Y	0	yellow
UMAG_00988	KIS71077	hypothetical protein	243.922	129.903	186.913	0.888044	0.159632	1.29933e-08	5.41875e-08	156.315	18.3375	104.921	7.14183	Y	Y	0	yellow
UMAG_03737	KIS68156	related to long-chain-fatty-acid-CoA ligase	2637.17	1412.73	2024.95	0.885847	0.129825	4.40773e-12	2.63647e-11	882.732	68.5415	598.141	78.6322	Y	Y	1	red
UMAG_05032	KIS67165	related to NIT3 - nitrilase	387.417	206.681	297.049	0.885718	0.155859	6.52236e-09	2.79591e-08	232.128	27.5365	156.497	20.2594	Y	Y	0	burlywood
UMAG_12244	KIS67831	related to small nuclear ribonucleoprotein associated protein b	168.333	89.5114	128.922	0.884972	0.173813	1.75384e-07	6.29085e-07	156.268	19.849	105.485	11.2823	Y	Y	0	yellow
UMAG_01875	KIS70719	probable GAL7 - UDP-glucose--hexose-1-phosphate uridylyltransferase	81.1206	42.8737	61.9972	0.884463	0.203341	6.70389e-06	1.9784e-05	44.2295	4.00375	29.5601	1.91692	Y	Y	4	cyan
UMAG_10598	KIS69444	probable nucleoside-diphosphate kinase	1053.22	564.887	809.055	0.883614	0.13325	1.64653e-11	9.30586e-11	1542.62	135.468	1043.76	80.1597	Y	Y	0	yellow
UMAG_11142	KIS67237	probable THR4 - threonine synthase (o-p-homoserine p-lyase)	546.016	292.632	419.324	0.883614	0.138053	7.69631e-11	4.0853e-10	215.221	26.7128	145.707	10.1875	Y	Y	0	yellow
UMAG_04327	KIS67222	related to UFD2 - ubiquitin fusion degradation protein	774.183	409.353	591.768	0.882961	0.202938	6.58318e-06	1.94633e-05	159.129	38.1103	106.808	24.1949	Y	Y	8	cyan
UMAG_06048	KIS65959	related to methionine-R-sulfoxide reductase	93.1409	49.2516	71.1962	0.882	0.205453	8.68253e-06	2.50958e-05	90.0608	13.7802	60.5431	4.85167	Y	Y	4	light-green
UMAG_02114	KIS69579	hypothetical protein	123.461	65.6637	94.5621	0.881952	0.177987	3.60561e-07	1.257e-06	82.1801	6.76223	55.3335	7.47394	Y	Y	4	cyan
UMAG_02461	KIS69949	probable LPD1 - dihydrolipoamide dehydrogenase precursor	1976.4	1065.41	1520.9	0.881501	0.106499	6.34009e-17	5.82603e-16	870.505	60.2565	594.595	51.7635	Y	Y	8	cyan
UMAG_11536	KIS67535	probable RPL5 - 60S large subunit ribosomal protein L5.e	1749.77	927.475	1338.62	0.880579	0.197123	3.76897e-06	1.15446e-05	1308.75	167.275	879.072	230.432	Y	Y	0	yellow
UMAG_01645	KIS70470	hypothetical protein	311.373	164.777	238.075	0.87975	0.208936	1.24026e-05	3.51871e-05	133.05	9.46594	89.531	27.8099	Y	Y	2	burlywood
UMAG_02514	KIS69163	related to UPF3 - Nonsense-mediated mRNA decay protein	129.133	68.3637	98.7486	0.878546	0.20554	9.46898e-06	2.72957e-05	89.0888	6.33942	59.9074	16.6514	Y	Y	8	magenta
UMAG_01366	KIS71471	probable BMH1 - 14-3-3 protein epsilon	4239.14	2286.37	3262.75	0.878257	0.118821	7.21178e-14	5.17645e-13	3628.33	383.087	2472.4	135.841	Y	Y	0	yellow
UMAG_03333	KIS68767	related to IST1 - protein with a positive role in the multivesicular body sorting pathway	223.893	119.988	171.94	0.877657	0.163728	4.12739e-08	1.62085e-07	180.46	20.4968	122.24	13.2107	Y	Y	0	pink
UMAG_00284	KIS71856	related to vesicle-associated membrane protein 7	180.701	96.8116	138.756	0.877652	0.164059	4.40683e-08	1.72221e-07	192.431	16.0742	130.698	15.8962	Y	Y	0	burlywood
UMAG_10611	KIS70974	probable U6 snRNA-associated Sm-like protein LSm6	32.5795	16.2053	24.3924	0.876824	0.379253	0.00929724	0.0164124	84.163	42.3865	53.9791	15.9506	Y	Y	0	yellow
UMAG_02442	KIS69928	related to translation elongation factor eEF1	5472.12	2936.82	4204.47	0.876556	0.147455	1.27101e-09	5.92405e-09	2944.78	405.652	1990.83	224.503	Y	Y	0	yellow
UMAG_11309	KIS71458	related to coatomer epsilon subunit	357.134	192.578	274.856	0.873505	0.141273	3.17774e-10	1.5901e-09	250.173	17.3798	171.044	23.7755	Y	Y	2	light-green
UMAG_01529	KIS70360	related to TAF10 - TFIID and SAGA subunit	360.252	194.274	277.263	0.873277	0.143562	5.95068e-10	2.89905e-09	209.014	25.9332	142.23	10.2679	Y	Y	8	salmon
UMAG_02354	KIS69832	hypothetical protein	78.2828	41.7002	59.9915	0.872707	0.206208	1.15362e-05	3.2888e-05	80.1439	7.45562	53.9508	3.32107	Y	Y	8	light-cyan
UMAG_10025	KIS71669	hypothetical protein	143.81	76.7357	110.273	0.87211	0.196145	4.35192e-06	1.31988e-05	54.6031	10.0946	36.7943	6.07137	Y	Y	0	yellow
UMAG_02840	KIS68851	related to CHS5 - chitin biosynthesis protein	178.926	95.3045	137.115	0.871476	0.202559	8.41457e-06	2.44306e-05	78.9411	13.0871	53.5881	12.8964	Y	Y	0	yellow
UMAG_01142	KIS71239	related to RSM25 - mitochondrial ribosomal protein	351.123	189.524	270.324	0.870711	0.151846	4.91902e-09	2.13268e-08	226.576	21.1113	154.33	14.1573	Y	Y	0	yellow
UMAG_02142	KIS69607	related to muconate cycloisomerase	64.9451	33.9283	49.4367	0.869025	0.275574	0.000774969	0.00165552	30.3693	9.27234	20.0939	4.93859	N	Y	4	cyan
UMAG_04963	KIS67094	hypothetical protein	93.97	49.5369	71.7535	0.86884	0.245433	0.000196036	0.000456522	83.6277	23.1453	56.1643	12.8489	Y	Y	0	burlywood
UMAG_01672	KIS70501	probable succinyl-coa synthetase alpha chain	1319.24	718.459	1018.85	0.868084	0.101588	6.56176e-18	6.53143e-17	892.874	14.3108	615.205	8.31634	Y	Y	0	yellow
UMAG_05947	KIS66212	related to DCG1 - involved in nitrogen-catabolite metabolism	157.598	84.9113	121.254	0.867306	0.168591	1.36258e-07	4.97584e-07	137.448	17.2315	93.7615	7.11214	Y	Y	0	beige
UMAG_01370	KIS71475	related to Thioredoxin	148.356	79.6202	113.988	0.867016	0.191338	2.93387e-06	9.13829e-06	218.936	41.4289	148.651	12.9973	Y	Y	0	yellow
UMAG_04017	KIS67972	related to TRS33 - subunit of the transport protein particle complex	94.214	50.4171	72.3155	0.866636	0.198747	6.54689e-06	1.93649e-05	67.7356	3.98121	45.9848	8.53662	Y	Y	0	pink
UMAG_03914	KIS67858	related to Lactaldehyde reductase	191.248	102.993	147.12	0.86599	0.176933	4.96838e-07	1.7045e-06	102.451	10.3359	69.6126	13.3781	Y	Y	0.5	light-cyan
UMAG_11133	KIS67721	hypothetical protein	108.563	58.0091	83.286	0.865839	0.206454	1.37571e-05	3.87912e-05	207.271	40.5496	141.299	20.3214	Y	Y	0	burlywood
UMAG_04051	KIS68010	hypothetical protein	127.304	68.5237	97.914	0.864816	0.184134	1.33448e-06	4.38045e-06	92.2825	12.0276	62.8088	5.8203	Y	Y	0	pink
UMAG_05629	KIS66840	hypothetical protein	292.41	158.398	225.404	0.864471	0.149252	3.56184e-09	1.57384e-08	95.0414	8.35197	65.4061	10.118	Y	Y	8	beige
UMAG_03233	KIS68662	related to Aldo-keto reductase yakc [NADP ]	326.788	177.412	252.1	0.864014	0.139718	3.20904e-10	1.60452e-09	198.456	13.8334	136.659	15.018	Y	Y	0	pink
UMAG_05037	KIS67170	related to glyoxylate/hydroxypyruvate reductase	75.9789	40.5068	58.2429	0.862968	0.228172	7.74228e-05	0.000194991	44.5638	5.12007	30.1029	7.24354	Y	Y	4	light-cyan
UMAG_04229	KIS67731	hypothetical protein	42.3608	22.1262	32.2435	0.861817	0.284522	0.00120025	0.00248833	32.0519	4.49907	21.2482	6.94256	Y	Y	2	cyan
UMAG_01919	KIS70765	related to CDD1 - cytidine deaminase	112.659	60.5145	86.5869	0.861674	0.199876	8.20712e-06	2.38668e-05	135.515	16.0612	92.0973	17.2931	Y	Y	0.5	dark-green
UMAG_10764	KIS70200	related to TR4 orphan receptor associated protein TRA16	43.3857	22.9393	33.1625	0.861071	0.255479	0.000374219	0.000838521	59.3122	2.08324	39.7549	4.35968	Y	Y	6	cyan
UMAG_06117	KIS66027	related to YLF2 - putative glycogen phosphorylase	845.255	459.14	652.198	0.858413	0.160764	4.70795e-08	1.83434e-07	479.28	18.3236	327.777	57.3286	Y	Y	0	yellow
UMAG_01710	KIS70542	related to N-carbamoyl-L-amino acid hydrolase	305.245	165.296	235.27	0.857516	0.179594	9.13159e-07	3.05016e-06	148.192	16.8998	101.357	21.8551	Y	Y	12	dark-green
UMAG_03068	KIS69090	related to NADPH2	167.093	88.6005	127.847	0.857192	0.259529	0.000469364	0.00103803	113.427	12.6521	76.1295	31.1877	Y	Y	4	light-cyan
UMAG_00937	KIS71020	hypothetical protein	90.1095	48.5401	69.3248	0.857017	0.2007	9.96602e-06	2.8639e-05	108.97	8.85419	74.4695	11.6441	Y	Y	0	pink
UMAG_04225	KIS67727	related to conserved oligomeric Golgi complex component 4	285.733	154.915	220.324	0.856954	0.169707	2.27467e-07	8.0694e-07	75.4222	7.54896	52.1393	11.5467	Y	Y	8	green
UMAG_10406	KIS67723	related to GYP5 - GTPase-activating protein for Ypt Proteins	282.322	152.609	217.465	0.856335	0.186684	2.28875e-06	7.24417e-06	95.0043	20.2439	65.3837	11.635	Y	Y	8	magenta
UMAG_03833	KIS68251	probable GTP-binding protein ypt1	922.124	501.565	711.845	0.856201	0.16122	5.58203e-08	2.15026e-07	987.407	171.494	679.26	46.0852	Y	Y	4	cyan
UMAG_11291	KIS67866	probable RPT4 - 26S proteasome regulatory subunit	1101.78	601.405	851.594	0.855238	0.146539	2.74906e-09	1.23497e-08	603.171	76.4108	415.959	33.6902	Y	Y	0	yellow
UMAG_06076	KIS65986	related to quinate transport protein	52.3538	27.9389	40.1464	0.849751	0.250764	0.000354172	0.000797474	20.334	3.42834	13.8044	2.13681	N	N	4	magenta
UMAG_12296	KIS67175	related to CMC1 - mitochondrial intermembrane space copper-binding protein	51.5723	27.5586	39.5655	0.849349	0.253262	0.000400759	0.000894773	118.461	21.7605	80.0934	7.56547	Y	Y	0	yellow
UMAG_11028	KIS66135	related to WHI2 - growth regulation protein	233.077	127.269	180.173	0.848688	0.166942	1.91937e-07	6.85036e-07	133.825	4.37153	92.8875	18.6796	Y	Y	2	green
UMAG_05183	KIS70111	related to TOA1 - transcription factor TFIIA-L	192.353	104.103	148.228	0.847285	0.210333	2.85994e-05	7.682e-05	201.232	54.7427	137.369	16.8327	Y	Y	0	burlywood
UMAG_06324	KIS70238	probable ATP5 - F1F0-ATPase complex	1184.96	653.207	919.081	0.847099	0.120222	9.65343e-13	6.22989e-12	1211.76	86.5334	844.955	35.6601	Y	Y	0	yellow
UMAG_11495	KIS68907	related to nadh-ubiquinone oxidoreductase 21.3 kDa subunit	462.953	253.601	358.277	0.847069	0.158098	4.36793e-08	1.71011e-07	569.134	53.3493	394.408	56.2417	Y	Y	0	yellow
UMAG_05180	KIS70108	related to BRX1 - Essential nucleolar protein required for biogenesis of the 60S ribosomal subunit	136.241	71.6406	103.941	0.846398	0.306422	0.00276969	0.00539898	97.6276	29.8189	64.3069	29.8062	Y	Y	0	yellow
UMAG_03134	KIS68561	hypothetical protein	41.3252	21.958	31.6416	0.846243	0.270783	0.000894675	0.00189557	57.1993	5.3767	38.0599	8.5533	Y	Y	0	yellow
UMAG_00607	KIS72190	related to phosducin homolog	166.854	91.4971	129.175	0.84465	0.162042	9.74679e-08	3.62697e-07	124.036	11.7754	86.1878	3.55587	Y	Y	0	yellow
UMAG_10754	KIS66494	related to atp synthase epsilon chain	156.23	83.6653	119.948	0.843532	0.258273	0.000546398	0.0011945	530.301	186.51	360.475	19.1491	Y	Y	0	yellow
UMAG_05927	KIS66191	hypothetical protein	4.87793	1.92497	3.40145	0.842649	0.705779	0.0837962	0.11968	3.03687	0.313542	1.33977	0.417578	N	N	6	cyan
UMAG_12251	KIS68017	related to MIM1 û mitochondrial protein required for outer membrane protein import	180.492	99.3388	139.915	0.842248	0.154883	2.82331e-08	1.13143e-07	192.487	12.3463	133.561	5.6786	Y	Y	0	pink
UMAG_01539	KIS70369	hypothetical protein	129.936	70.7463	100.341	0.841965	0.194706	7.97994e-06	2.32419e-05	55.5645	8.68212	38.443	8.06472	Y	Y	4	magenta
UMAG_03240	KIS68669	related to RUD3 - suppressor of uso1-1 transport defect	323.294	177.714	250.504	0.841718	0.158775	6.01536e-08	2.30619e-07	139.637	20.6664	97.1419	12.3652	Y	Y	2	light-green
UMAG_04237	KIS67739	probable ubiquinol--cytochrome-c reductase	606.659	334.31	470.484	0.841451	0.145509	3.86029e-09	1.6999e-08	1052.4	116.108	735.742	88.6897	Y	Y	0	yellow
UMAG_11722	KIS69394	probable YDJ1 - mitochondrial and ER import protein	2218.92	1207.63	1713.27	0.84021	0.20784	2.69613e-05	7.27526e-05	1212.83	102.558	826.862	221.308	Y	Y	0	yellow
UMAG_06111	KIS66019	putative IDP1 - isocitrate dehydrogenase (NADP )	1211.13	667.149	939.142	0.840123	0.154062	2.60601e-08	1.05021e-07	537.174	87.1683	374.362	42.9495	N	Y	0	yellow
UMAG_10390	KIS68602	hypothetical protein	27.984	14.6074	21.2957	0.839588	0.334649	0.00590652	0.0108491	18.8477	4.04175	12.5411	3.2673	Y	Y	12	beige
UMAG_02323	KIS69800	related to PEX14 - peroxisomal protein involved in protein import - peroxin	283.194	155.815	219.504	0.839173	0.166009	2.2496e-07	7.99362e-07	173.039	19.3662	120.091	19.2161	Y	Y	0	beige
UMAG_05844	KIS66104	hypothetical protein	351.976	194.597	273.286	0.837551	0.13883	8.57184e-10	4.09571e-09	224.761	13.5861	157.979	23.3277	Y	Y	1	green
UMAG_03241	KIS68670	probable KRR1 - required for 40S ribosome biogenesis	200.664	108.854	154.759	0.837215	0.23192	0.000155761	0.000368983	122.874	14.4786	83.9237	27.7677	Y	Y	2	light-green
UMAG_11097	KIS68437	related to QCR10 - ubiquinol--cytochrome-c reductase 8.5 kDa subunit	136.473	73.9642	105.219	0.837214	0.234643	0.00018328	0.000428826	376.544	102.881	258.784	33.1003	Y	Y	0	yellow
UMAG_05689	KIS66904	related to AIF1 - mitochondrial cell death effector	478.214	262.216	370.215	0.836763	0.186897	3.92229e-06	1.19745e-05	264.301	54.067	183.478	36.4026	Y	Y	0.5	dark-green
UMAG_06507	KIS70886	hypothetical protein	231.105	126.496	178.801	0.835844	0.193231	7.95256e-06	2.3183e-05	108.528	15.759	75.6908	19.1064	Y	Y	0.5	light-cyan
UMAG_04898	KIS67025	related to HSD1 - ER membrane protein	208.476	113.03	160.753	0.835624	0.233316	0.000174943	0.000411249	105.631	12.5033	72.7717	25.448	Y	Y	2	yellow
UMAG_10917	KIS66963	probable RING-box protein 1	141.912	77.8962	109.904	0.835402	0.184495	3.13679e-06	9.72813e-06	297.023	39.0805	206.819	30.8661	Y	Y	6	beige
UMAG_00729	KIS72321	probable RFC4 - DNA replication factor C	90.8651	49.1907	70.0279	0.835264	0.232047	0.000165121	0.000389726	59.0672	7.73584	40.8743	13.2307	Y	Y	4	yellow
UMAG_10271	KIS70755	related to PMU1 - putative phosphomutase	222.807	122.97	172.888	0.835129	0.163573	1.7395e-07	6.24286e-07	136.318	10.2031	95.2689	14.8926	Y	Y	12	light-cyan
UMAG_11567	KIS70124	related to Histidine triad protein	149.39	81.8079	115.599	0.834988	0.197396	1.22175e-05	3.46772e-05	189.454	18.8193	131.377	33.3149	Y	Y	0.5	light-cyan
UMAG_04479	KIS67377	related to 4-coumarate--CoA ligase	113.211	62.1716	87.6913	0.834774	0.184776	3.29929e-06	1.02027e-05	44.9062	3.50677	31.3688	4.66672	Y	Y	1	dark-green
UMAG_02463	KIS69951	hypothetical protein	516.281	287.441	401.861	0.833173	0.119603	1.73844e-12	1.08296e-11	333.737	22.0885	234.628	3.08852	Y	Y	0	burlywood
UMAG_06236	KIS65860	probable RIB3 - 3	135.797	74.8232	105.31	0.833054	0.185273	3.61715e-06	1.11112e-05	125.772	11.355	87.197	12.427	Y	Y	0	burlywood
UMAG_15040	KIS70298	probable arginyl-tRNA synthetase	746.79	413.582	580.186	0.832806	0.131251	9.25808e-11	4.87029e-10	262.536	31.432	183.485	6.39195	Y	Y	0	yellow
UMAG_12334	KIS70231	hypothetical protein	95.2459	52.074	73.66	0.832754	0.207867	3.23498e-05	8.5894e-05	60.9571	9.62225	42.4352	6.54495	Y	Y	0	yellow
UMAG_11648	KIS71250	hypothetical protein	332.655	184.044	258.349	0.832412	0.162367	1.55433e-07	5.61574e-07	315.588	30.2705	220.508	28.7963	Y	Y	0	pink
UMAG_00486	KIS72065	probable PGM2 - phosphoglucomutase	5919.74	3285.83	4602.79	0.831984	0.140108	1.50944e-09	6.97497e-09	2399.51	341.796	1684.46	174.211	Y	Y	0	pink
UMAG_10855	KIS66805	related to MKK1 - MAP kinase kinase	181.284	99.1383	140.211	0.831889	0.208203	3.36979e-05	8.918e-05	60.0741	9.07091	41.8336	11.9317	Y	Y	2	light-green
UMAG_04830	KIS66768	related to LEO1 - component of the Paf1 complex	402.713	221.348	312.03	0.831452	0.191426	7.27975e-06	2.13596e-05	146.189	39.8452	101.704	6.89472	Y	Y	2	yellow
UMAG_00906	KIS70988	related to BUR6 - subunit of a heterodimeric NC2 transcription regulator complex with Ncb2p	71.3602	39.0371	55.1987	0.83018	0.217032	6.85405e-05	0.000173636	127.189	18.1101	87.4813	6.91175	Y	Y	8	beige
UMAG_05850	KIS66110	related to FMS1 - polyamine oxidase	346.583	193.03	269.807	0.828077	0.137136	8.38775e-10	4.01965e-09	149.426	11.5367	105.463	10.125	Y	Y	0	burlywood
UMAG_04667	KIS67571	hypothetical protein	72.8999	36.8201	54.86	0.827549	0.420787	0.0225103	0.0366472	49.019	37.7582	31.3447	12.2726	Y	Y	0	burlywood
UMAG_04072	KIS68032	hypothetical protein	55.6955	30.332	43.0138	0.825463	0.24035	0.000311158	0.000707028	61.223	9.80263	42.6535	4.73219	Y	Y	0	pink
UMAG_05606	KIS66618	probable BNA1 - 3-hydroxyanthranilic acid dioxygenase	84.1425	44.6393	64.3909	0.825064	0.320952	0.00501014	0.00934339	103.035	47.2577	69.4793	14.5214	Y	Y	0	pink
UMAG_03533	KIS68444	probable RPL23A - 60S large subunit ribosomal protein L23.e	445.27	247.627	346.448	0.82445	0.160849	1.58309e-07	5.71234e-07	727.506	112.382	512.053	48.5561	Y	Y	0	yellow
UMAG_00265	KIS71836	related to pyruvate dehydrogenase complex protein X precursor	317.119	176.053	246.586	0.82362	0.174094	1.18963e-06	3.92292e-06	207.264	39.6375	145.804	6.99078	Y	Y	0	yellow
UMAG_05437	KIS66446	hypothetical protein	196.428	108.851	152.639	0.821971	0.182789	3.69077e-06	1.13319e-05	70.3216	12.8084	49.5128	7.7326	Y	Y	0.5	dark-green
UMAG_04733	KIS66670	related to phosphatidylglycerol/phosphatidylinositol transfer protein	589.928	330.123	460.025	0.819429	0.144036	6.75719e-09	2.88891e-08	681.015	92.0998	482.481	27.0568	Y	Y	8	light-cyan
UMAG_01942	KIS70791	related to Microsomal dipeptidase precursor	130.887	72.4654	101.676	0.818823	0.19406	1.31601e-05	3.71728e-05	62.0256	5.57198	43.7753	10.1082	Y	Y	0	yellow
UMAG_02124	KIS69589	related to ERG6 - Delta(24)-sterol C-methyltransferase	94.2129	51.6898	72.9514	0.817782	0.236583	0.000287239	0.000656371	74.081	19.3872	51.4944	9.43492	Y	Y	4	cyan
UMAG_03071	KIS69093	related to enoyl-CoA-hydratase	814.084	458.622	636.353	0.817361	0.11329	2.9386e-13	1.9795e-12	315.678	12.0686	224.686	8.63205	Y	Y	0	pink
UMAG_10838	KIS68750	hypothetical protein	132.431	73.6562	103.044	0.817168	0.183309	4.45129e-06	1.34749e-05	119.05	8.11375	84.0597	15.2037	Y	Y	4	magenta
UMAG_10243	KIS71445	related to DNA-damage inducible protein 2	308.82	172.665	240.742	0.81631	0.163987	3.46155e-07	1.2107e-06	137.992	18.0598	97.7155	12.18	Y	Y	0	beige
UMAG_11551	KIS67567	probable RPS19B - ribosomal protein S19.e	536.225	298.823	417.524	0.815933	0.180759	3.40892e-06	1.05266e-05	750.518	63.445	527.547	115.965	Y	Y	0	yellow
UMAG_06046	KIS65957	hypothetical protein	95.2406	52.8755	74.058	0.815861	0.196007	1.69573e-05	4.72174e-05	75.1019	4.94511	52.6402	9.23074	Y	Y	0	burlywood
UMAG_10929	KIS72210	hypothetical protein	70.0463	38.4933	54.2698	0.815793	0.234971	0.000273634	0.000626391	161.434	33.2751	112.758	12.8745	Y	Y	8	salmon
UMAG_01951	KIS70800	hypothetical protein	66.2279	36.5789	51.4034	0.81559	0.22772	0.000180705	0.000423416	58.4714	5.85534	40.492	6.14408	Y	Y	0	pink
UMAG_01970	KIS70822	hypothetical protein	79.3143	43.9063	61.6103	0.813771	0.209093	5.36452e-05	0.000137519	91.5408	5.89653	64.4812	12.4728	Y	Y	1	dark-green
UMAG_05614	KIS66626	related to Acetyltransferase	29.0092	15.6022	22.3057	0.813413	0.30989	0.00444682	0.00835072	29.6959	4.3504	20.2158	2.42956	Y	Y	1	dark-green
UMAG_03057	KIS69078	related to tRNA pseudouridine synthase B	178.953	100.372	139.662	0.812925	0.159839	1.99558e-07	7.11056e-07	89.7419	5.96136	63.4883	7.35873	Y	Y	0	yellow
UMAG_11575	KIS66450	hypothetical protein	189.189	106.057	147.623	0.81205	0.168043	7.31997e-07	2.47576e-06	171.092	16.4617	121.038	16.4631	Y	Y	0.5	light-cyan
UMAG_11822	KIS71982	probable MRPL23 - mitochondrial ribosomal protein	131.417	73.1858	102.301	0.811237	0.20073	2.85109e-05	7.66142e-05	178.658	36.098	125.504	12.1622	Y	Y	0	pink
UMAG_11807	KIS65930	probable ATP phosphoribosyltransferase	188.698	105.995	147.347	0.810787	0.16142	2.77479e-07	9.76316e-07	129.81	9.94505	92.2632	10.4798	Y	Y	0	yellow
UMAG_10234	KIS71405	related to GLE1 - RNA export mediator	174.015	96.0327	135.024	0.810592	0.232645	0.000261317	0.000600076	50.2499	13.5931	35.1314	8.2444	N	Y	1	green
UMAG_11310	KIS71459	hypothetical protein	101.586	56.1734	78.8799	0.810407	0.226288	0.000182374	0.00042717	70.606	16.1357	49.7532	7.77844	Y	Y	4	green
UMAG_11218	KIS65791	hypothetical protein	97.7347	54.2278	75.9813	0.80896	0.222215	0.000145309	0.000346266	172.576	40.2472	120.847	8.40845	Y	Y	0	yellow
UMAG_11225	KIS65821	hypothetical protein	260.112	146.578	203.345	0.808213	0.153793	8.08953e-08	3.03651e-07	132.407	14.515	94.1382	8.8591	Y	Y	0	yellow
UMAG_05148	KIS70074	related to ATP-dependent DNA helicase II	127.795	71.2708	99.5327	0.807883	0.195845	2.01788e-05	5.56121e-05	40.0157	4.80584	28.5214	6.37584	N	Y	0	yellow
UMAG_02426	KIS69912	probable ubiquitin-conjugating enzyme E2	124.723	69.268	96.9955	0.807378	0.220444	0.000133574	0.000320181	160.175	26.2074	112.379	28.6546	Y	Y	12	beige
UMAG_00929	KIS71012	hypothetical protein	121.135	67.3616	94.2481	0.806433	0.214714	9.31015e-05	0.000230259	78.9452	6.97688	55.7626	14.9577	Y	Y	0.5	burlywood
UMAG_12121	KIS71035	hypothetical protein	65.1844	36.1011	50.6427	0.806284	0.230798	0.000256729	0.000589784	73.6564	10.048	51.6392	9.37485	Y	Y	0.5	red
UMAG_04417	KIS67316	probable CRN1 - a coronin	601.928	340.291	471.109	0.806218	0.139738	4.37186e-09	1.90697e-08	241.266	35.8012	172.468	14.1699	Y	Y	2	yellow
UMAG_01803	KIS70638	related to NCA2 - control of mitochondrial synthesis of Atp6p and Atp8p	421.516	238.788	330.152	0.804508	0.13331	8.90832e-10	4.2502e-09	127.818	12.4078	91.8655	9.61293	Y	Y	0.5	burlywood
UMAG_05061	KIS67195	hypothetical protein	383.319	217.124	300.222	0.804391	0.134133	1.11627e-09	5.25591e-09	164.978	10.6391	118.49	15.1335	Y	Y	0.5	red
UMAG_11703	KIS69805	probable KAE1 - Putative O-sialo-glycoprotein-endopeptidase A1	162.751	91.5623	127.156	0.803917	0.172759	1.79731e-06	5.78219e-06	80.7375	11.13	57.6042	5.87031	Y	Y	0	beige
UMAG_02631	KIS69288	hypothetical protein	324.297	183.205	253.751	0.803073	0.154495	1.12128e-07	4.14387e-07	76.2345	12.6465	54.6205	6.21353	N	Y	0	pink
UMAG_01076	KIS71167	related to GRH1 - acetylated protein	106.018	58.9853	82.5017	0.802574	0.217251	0.000119902	0.000289343	66.5302	8.849	47.3245	13.4187	Y	Y	4	light-green
UMAG_01126	KIS71221	probable MRPL38 - mitochondrial ribosomal protein	102.135	56.8565	79.4958	0.802484	0.226163	0.000208323	0.000484263	171.878	31.3155	120.7	25.4311	Y	Y	0	yellow
UMAG_10437	KIS67809	hypothetical protein	179.676	101.48	140.578	0.802397	0.155984	1.49675e-07	5.42365e-07	104.838	3.72687	75.1269	10.1044	Y	Y	0	burlywood
UMAG_10512	KIS68255	probable 25 kD subunit of DNA-directed RNA polymerases I	196.587	111.079	153.833	0.802308	0.162541	4.38797e-07	1.51503e-06	210.617	17.0343	150.586	12.587	Y	Y	0	yellow
UMAG_10331	KIS68967	related to peroxisomal membrane protein	1052.62	592.602	822.611	0.800871	0.182239	6.08059e-06	1.811e-05	1367.31	293.396	973.52	79.749	Y	Y	0	pink
UMAG_10836	KIS68744	protein mediates microtubule-dependent mRNA transport	373.867	210.42	292.143	0.800365	0.184441	7.79789e-06	2.27835e-05	105.798	11.6166	75.2601	18.6746	Y	Y	2	light-green
UMAG_04838	KIS66776	probable isopentenyl-diphosphate delta-isomerase	191.993	108.029	150.011	0.800278	0.191252	1.55619e-05	4.34818e-05	163.466	23.4924	115.949	18.0274	Y	Y	0	yellow
UMAG_10691	KIS66740	related to Long-chain-fatty-acid--CoA ligase	78.0373	43.3012	60.6693	0.799908	0.240447	0.000472174	0.00104282	25.4803	0.710779	17.8467	6.10205	Y	N	0.5	dark-green
UMAG_00049	KIS71606	hypothetical protein	54.4019	30.1246	42.2633	0.799374	0.259379	0.00109306	0.00228296	83.3804	14.2378	57.8222	11.7167	Y	Y	2	yellow
UMAG_04390	KIS67290	hypothetical protein	332.385	188.628	260.506	0.797952	0.151381	7.54358e-08	2.8498e-07	190.406	7.94632	137.175	22.5837	Y	Y	0	burlywood
UMAG_03851	KIS68270	probable ADE12 - adenylosuccinate synthetase	1533.87	870.211	1202.04	0.797587	0.142978	1.20663e-08	5.0583e-08	780.625	77.77	560.507	73.1802	Y	Y	0	yellow
UMAG_04959	KIS67090	related to BCH1 - Protein involved in transport at the trans-Golgi	689.456	390.966	540.211	0.797199	0.157388	2.26297e-07	8.03229e-07	190.251	23.8411	136.992	24.3193	Y	Y	2	yellow
UMAG_01170	KIS71270	hypothetical protein	70.3598	39.1764	54.7681	0.796647	0.234171	0.00036327	0.00081682	33.0594	6.86707	23.2896	3.74455	N	Y	1	dark-green
UMAG_10703	KIS66780	related to BNA3 - Arylformamidase	150.465	84.9402	117.703	0.795633	0.180723	5.94731e-06	1.77376e-05	73.3578	7.66636	52.7566	10.5341	Y	Y	0	yellow
UMAG_10110	KIS72004	probable 60S ribosomal protein L36	415.027	235.703	325.365	0.795454	0.158872	3.11711e-07	1.092e-06	815.056	70.884	585.972	93.9937	Y	Y	0	yellow
UMAG_12022	KIS66977	hypothetical protein	117.526	66.0365	91.781	0.795327	0.206249	6.31316e-05	0.0001605	137.573	26.743	98.3387	14.0468	Y	Y	0.5	beige
UMAG_11381	KIS70842	hypothetical protein	38.4965	20.8653	29.6809	0.794207	0.322899	0.00719953	0.0130095	37.1852	12.7974	25.6184	4.43082	Y	Y	0	pink
UMAG_12058	KIS68824	hypothetical protein (C-terminal fragment)	35.924	19.5033	27.7136	0.792796	0.312197	0.00583627	0.0107292	50.5851	13.4713	35.1419	9.19008	N	N	6	#N/A
UMAG_00417	KIS71994	hypothetical protein	105.515	59.7065	82.6107	0.792222	0.181333	6.99511e-06	2.06152e-05	84.0188	5.15515	60.119	7.8815	Y	Y	2	magenta
UMAG_06503	KIS65649	hypothetical protein	28.7435	15.4738	22.1087	0.792071	0.334766	0.00933863	0.0164784	16.7192	4.16496	11.5382	3.46531	N	Y	0.5	red
UMAG_10674	KIS66656	related to rna binding motif protein	149.948	82.3449	116.146	0.791736	0.288184	0.00316531	0.0060984	84.769	15.1523	59.4973	25.5605	Y	Y	2	burlywood
UMAG_03540	KIS68452	hypothetical protein	140.691	79.3429	110.017	0.791094	0.193985	2.53419e-05	6.87612e-05	47.3125	2.75239	34.2551	10.0503	Y	Y	8	light-cyan
UMAG_04485	KIS67383	related to Cut9 interacting protein scn1	40.8244	22.2748	31.5496	0.790611	0.310792	0.00574747	0.010587	25.1314	6.39248	17.4322	5.94421	N	Y	6	magenta
UMAG_11600	KIS65968	related to GAL10 - UDP-glucose 4-epimerase	621.725	353.994	487.86	0.790413	0.164364	8.44159e-07	2.83581e-06	370.872	40.3432	265.423	39.8046	Y	Y	0	burlywood
UMAG_10905	KIS67469	hypothetical protein	422.03	241.372	331.701	0.790198	0.136689	4.19536e-09	1.83743e-08	267.992	5.18735	194.239	28.3817	Y	Y	0	dark-green
UMAG_01553	KIS70383	hypothetical protein	402.242	229.62	315.931	0.789131	0.148595	6.17335e-08	2.36255e-07	310.897	15.9013	225.673	43.4978	Y	Y	4	cyan
UMAG_05628	KIS66839	hypothetical protein	67.2207	37.3584	52.2895	0.788404	0.263565	0.0014963	0.00306665	57.2565	17.2167	40.6364	4.18661	Y	Y	8	light-cyan
UMAG_04490	KIS67391	hypothetical protein	103.472	57.8309	80.6515	0.788162	0.246662	0.000756014	0.0016177	189.471	49.6247	134.433	31.6813	Y	Y	0.5	light-cyan
UMAG_00441	KIS72019	hypothetical protein	11.0351	5.53905	8.28708	0.78767	0.481643	0.048173	0.0726927	4.62008	1.11718	2.84994	0.879019	N	N	4	magenta
UMAG_04092	KIS68050	hypothetical protein	43.8784	24.1286	34.0035	0.787438	0.304395	0.00509449	0.0094814	21.6937	5.56386	15.0102	4.3147	N	Y	0	burlywood
UMAG_02015	KIS70870	related to uridine kinase	218.25	124.067	171.159	0.785245	0.183746	1.07875e-05	3.08897e-05	69.6907	9.79693	50.2664	10.7511	Y	Y	2	green-yellow
UMAG_11034	KIS66146	hypothetical protein	357.146	202.641	279.893	0.78403	0.198356	4.29315e-05	0.000111965	222.768	51.5206	160.475	28.367	Y	Y	0.5	light-cyan
UMAG_00040	KIS71597	hypothetical protein	101.677	57.6274	79.6522	0.783814	0.202519	6.07394e-05	0.000154601	74.1311	11.2648	53.4095	8.77601	Y	Y	1	burlywood
UMAG_00660	KIS72247	golgi adaptor HA1/AP1 adaptin gamma subunit	453.43	259.524	356.477	0.783164	0.158786	4.60384e-07	1.58702e-06	116.329	13.1727	84.437	16.7614	Y	Y	4	light-green
UMAG_05586	KIS66597	related to hydroxyquinol-1	10.0011	4.73928	7.37017	0.782843	0.552568	0.0697928	0.101614	7.09409	3.12774	4.33226	2.74551	N	N	8	cyan
UMAG_11672	KIS70318	related to Protein farnesyltransferase alpha subunit	201.452	114.513	157.982	0.782187	0.195458	3.51145e-05	9.27012e-05	113.655	16.4264	82.2195	18.5556	Y	Y	2	light-green
UMAG_02452	KIS69940	hypothetical protein	196.973	111.654	154.313	0.781068	0.20855	0.000100409	0.000246734	76.8846	16.4447	55.3767	12.8661	Y	Y	8	magenta
UMAG_05470	KIS66476	related to Hsp90 co-chaperone Cdc37	1066.7	608.801	837.748	0.78014	0.186407	1.59543e-05	4.4559e-05	477.367	42.143	341.753	73.9628	Y	Y	2	light-green
UMAG_00754	KIS72349	hypothetical protein	13.3478	6.94396	10.1459	0.779558	0.427556	0.0340738	0.0533876	17.8216	2.56491	11.1516	1.6823	Y	Y	4	cyan
UMAG_05137	KIS70062	probable 40S ribosomal protein s0	1425.27	820.176	1122.72	0.778851	0.14765	7.5588e-08	2.85215e-07	1152.25	62.7699	839.699	144.068	Y	Y	0	yellow
UMAG_12317	KIS66103	hypothetical protein	39.7874	21.9357	30.8616	0.778706	0.300753	0.00517284	0.00960522	32.8795	8.17129	22.9812	7.12867	Y	Y	6	cyan
UMAG_01818	KIS70654	related to TAE1 - AdoMet-dependent proline methyltransferase	206.115	118.608	162.362	0.778349	0.152373	1.85759e-07	6.64085e-07	146.933	9.2743	106.947	7.06152	Y	Y	0	yellow
UMAG_11649	KIS71251	related to D-amino acid oxidase	259.328	148.877	204.102	0.77825	0.166404	1.64452e-06	5.32512e-06	127.711	12.1005	92.5119	14.3564	Y	Y	0.5	light-cyan
UMAG_03145	KIS68572	related to RRP46 - Exosome non-catalytic core component	120.633	68.9657	94.7991	0.777341	0.18758	1.92962e-05	5.32936e-05	81.1618	13.2774	58.6681	2.01601	Y	Y	0	pink
UMAG_00928	KIS71011	hypothetical protein	82.9396	47.1591	65.0494	0.776939	0.218752	0.000213095	0.000494288	52.9168	5.36937	37.7197	7.61744	Y	Y	12	beige
UMAG_05617	KIS66628	related to Lipase/esterase	8.72586	4.08364	6.40475	0.776569	0.580013	0.0789221	0.113524	6.01344	2.94671	3.58006	1.61546	N	N	0	burlywood
UMAG_04700	KIS66638	related to ATP23 - putative metalloprotease of the mitochondrial inner membrane	126.825	72.8149	99.8199	0.776346	0.171125	3.2572e-06	1.00774e-05	130.208	13.203	94.5878	3.28377	Y	Y	2	yellow
UMAG_06003	KIS65914	probable prolyl isomerase Ess1	222.794	127.969	175.381	0.776298	0.171483	3.39138e-06	1.04825e-05	284.739	32.355	207.173	29.8554	Y	Y	4	yellow
UMAG_01011	KIS71100	related to lariat-debranching enzyme	144.478	82.2094	113.344	0.775907	0.206284	9.52232e-05	0.000235236	56.6703	11.7382	41.1106	8.03594	Y	Y	0.5	light-cyan
UMAG_04048	KIS68007	hypothetical protein	462.56	267.049	364.805	0.775499	0.139663	1.60968e-08	6.64442e-08	164.476	12.5552	120.698	18.1782	Y	Y	8	light-cyan
UMAG_04873	KIS66813	probable LYS12 - Homo-isocitrate dehydrogenase	723.372	416.003	569.688	0.77509	0.167048	1.98002e-06	6.329e-06	428.22	65.9313	310.833	34.6586	Y	Y	2	yellow
UMAG_10165	KIS69973	related to Ngg1p-interacting factor 3	158.359	90.6984	124.529	0.774779	0.189599	2.47326e-05	6.71595e-05	115.421	19.975	83.8335	7.82288	Y	Y	0	pink
UMAG_02407	KIS69891	related to thymidylate synthase	269.093	154.635	211.864	0.774665	0.172353	3.9599e-06	1.20665e-05	108.655	17.9053	79.0657	11.578	Y	Y	0	beige
UMAG_04320	KIS67214	related to PTC3 - ser/thr protein phosphatase PP2C	845.583	490.213	667.898	0.774511	0.118977	4.35832e-11	2.36993e-10	390.931	34.7626	287.186	27.7792	Y	Y	0	burlywood
UMAG_03352	KIS68786	hypothetical protein	226.065	130.08	178.073	0.773526	0.167467	2.20753e-06	7.0042e-06	153.029	18.4428	112.263	16.2606	Y	Y	0	pink
UMAG_10481	KIS68092	hypothetical protein	213.255	121.662	167.459	0.772943	0.208956	0.000121544	0.000293084	222.907	42.3778	161.619	37.9426	Y	Y	0.5	beige
UMAG_04329	KIS67225	hypothetical protein	80.8893	45.8487	63.369	0.771987	0.225042	0.000340612	0.000769355	62.2857	7.51383	45.155	13.6652	Y	Y	0.5	dark-green
UMAG_01755	KIS70589	hypothetical protein	493.511	282.69	388.1	0.771877	0.193268	3.67732e-05	9.67242e-05	163.979	14.6628	119.376	33.5796	Y	Y	0	burlywood
UMAG_10628	KIS69131	hypothetical protein	312.95	179.267	246.109	0.771337	0.197118	5.14972e-05	0.000132433	841.287	201.969	611.972	70.238	Y	Y	0	yellow
UMAG_06456	KIS65753	related to aminopeptidase Y precursor	67.5222	37.7112	52.6167	0.77044	0.283373	0.0035732	0.00681514	29.9947	10.4946	21.1124	6.28222	N	Y	0.5	light-cyan
UMAG_10955	KIS71812	hypothetical protein	97.5262	55.9604	76.7433	0.770213	0.191389	3.2704e-05	8.67631e-05	125.231	15.7002	90.9396	6.57649	Y	Y	4	salmon
UMAG_01898	KIS70743	related to endo-1	45.1801	25.3331	35.2566	0.769559	0.274229	0.00276593	0.00539327	25.718	6.28955	18.3838	2.55488	Y	Y	0	pink
UMAG_01906	KIS70751	related to NUT2 - subunit of the RNA polymerase II mediator complex	46.2167	26.0006	36.1087	0.768465	0.263445	0.00197009	0.00394507	52.4496	8.51006	37.2691	8.80128	Y	Y	4	cyan
UMAG_10035	KIS71703	probable protein transport protein sec61 beta subunit	111.097	63.2413	87.1693	0.768396	0.226436	0.000388551	0.000868525	259.154	52.7121	187.704	44.7461	Y	Y	2	yellow
UMAG_05228	KIS70157	related to RAD23 - nucleotide excision repair protein (ubiquitin-like protein)	2152.35	1252.62	1702.49	0.768114	0.124105	3.51181e-10	1.74644e-09	1077.94	123.482	793.016	66.1207	Y	Y	0	green
UMAG_10038	KIS71712	probable multifunctional beta-oxidation protein	925.362	537.451	731.406	0.767279	0.14099	3.05073e-08	1.21577e-07	227.524	17.0995	167.351	27.2702	Y	Y	0.5	dark-green
UMAG_02165	KIS69630	hypothetical protein	180.971	103.761	142.366	0.766442	0.203705	9.58229e-05	0.000236536	76.3723	10.7647	55.5759	15.956	Y	Y	6	green
UMAG_00597	KIS72179	probable ATP-binding cassette transporter protein	368.951	214.379	291.665	0.765831	0.142271	4.26815e-08	1.67307e-07	120.454	8.07521	88.745	14.0484	Y	Y	2	magenta
UMAG_01628	KIS70453	related to BET1 - Type II membrane protein required for vesicular transport between ER and Golgi	43.8976	24.8249	34.3613	0.765612	0.253948	0.00144781	0.00297482	53.444	3.98153	38.3236	5.71455	Y	Y	4	light-green
UMAG_02655	KIS69314	related to RNA binding motif protein	74.6936	42.5945	58.644	0.764333	0.22474	0.000383037	0.000857387	38.787	4.90233	28.2298	7.26468	Y	Y	6	magenta
UMAG_10129	KIS69837	probable translation initiation factor eIF2 gamma chain	1044.01	608.02	826.017	0.763893	0.138292	1.92748e-08	7.87076e-08	497.7	22.4661	366.704	52.1039	Y	Y	0	yellow
UMAG_02719	KIS69385	related to DJP1 - DnaJ-like protein	781.27	453.126	617.198	0.762956	0.166942	2.81312e-06	8.78336e-06	363.593	38.5732	265.513	48.0993	Y	Y	0	yellow
UMAG_11602	KIS66003	related to zinc finger protein	201.752	117.376	159.564	0.762441	0.152761	3.50154e-07	1.22204e-06	195.544	17.0325	144.271	9.96303	Y	Y	0	yellow
UMAG_00576	KIS72158	related to LRP1 - nuclear exosome-associated nucleic acid binding protein	420.347	243.817	332.082	0.762219	0.169375	3.91062e-06	1.19445e-05	394.945	62.7983	289.597	34.8846	Y	Y	4	cyan
UMAG_10663	KIS68190	probable RHO1 - GTP-binding protein of the rho subfamily of ras-like proteins	135.005	78.2659	106.635	0.760979	0.180442	1.42823e-05	4.01147e-05	131.049	14.3845	95.7524	10.0342	Y	Y	2	light-green
UMAG_10178	KIS70055	hypothetical protein	75.9524	43.4005	59.6765	0.760674	0.237982	0.000786745	0.00167735	200.275	47.4177	144.882	18.81	Y	Y	2	yellow
UMAG_00157	KIS71719	probable pyruvate kinase	3111.76	1823.85	2467.8	0.76063	0.108874	1.62974e-12	1.01918e-11	1318.05	58.2219	976.231	48.0029	Y	Y	0	yellow
UMAG_03867	KIS68286	related to ATP11 - F1F0-ATPase complex assembly protein	119.882	69.1419	94.5119	0.760617	0.199033	7.63161e-05	0.000192429	67.6074	9.22593	49.5944	9.08591	Y	Y	6	green
UMAG_03298	KIS68730	probable ERG10 - acetyl-CoA C-acetyltransferase	344.769	201.433	273.101	0.760051	0.136585	1.53992e-08	6.36459e-08	195.044	16.2094	144.368	11.3366	Y	Y	0.5	dark-green
UMAG_04216	KIS67716	related to translation elongation factor HBS1 protein	413.997	239.253	326.625	0.759859	0.190627	3.87046e-05	0.000101556	96.014	5.18544	70.76	19.7489	N	Y	8	cyan
UMAG_00048	KIS71605	hypothetical protein	142.16	82.2174	112.189	0.759649	0.192558	4.59393e-05	0.000119136	127.097	20.4265	93.3808	12.1638	Y	Y	0	yellow
UMAG_01747	KIS70580	related to Estradiol 17 beta-dehydrogenase 4	171.784	99.7459	135.765	0.759561	0.170698	5.0053e-06	1.50462e-05	115.429	18.8383	84.7163	9.4295	Y	Y	0.5	dark-green
UMAG_02491	KIS69978	glyceraldehyde 3-phosphate dehydrogenase (isoform A)	11686.8	6835.65	9261.25	0.759521	0.129114	2.33308e-09	1.05397e-08	7597.12	790.088	5621.02	325.098	Y	Y	0	yellow
UMAG_10681	KIS66678	probable ILV5 - ketol-acid reductoisomerase (mitochondrial)	2009.26	1176.34	1592.8	0.759289	0.125314	8.02792e-10	3.85292e-09	1104.1	74.8311	816.857	85.7676	Y	Y	0	yellow
UMAG_10591	KIS71055	hypothetical protein	132.128	76.2049	104.166	0.757725	0.209646	0.000172727	0.000406639	122.024	28.3893	89.1201	6.03562	Y	Y	0	burlywood
UMAG_03548	KIS68461	related to endo-polygalacturonase	108.804	63.064	85.934	0.757675	0.190632	4.0844e-05	0.00010678	66.8017	7.49133	49.1601	5.8137	Y	Y	0	pink
UMAG_10488	KIS68114	hypothetical protein	280.222	163.517	221.869	0.757171	0.155547	6.61124e-07	2.2431e-06	375.583	51.2788	277.702	14.5917	Y	Y	0	yellow
UMAG_06140	KIS66049	related to programmed cell death protein (calcium-binding protein)	227.425	133.092	180.258	0.755961	0.139674	3.68627e-08	1.45115e-07	171.573	6.73408	127.265	12.9451	Y	Y	12	beige
UMAG_02571	KIS69222	probable CCT4 - component of chaperonin-containing T-complex	1502.92	871.152	1187.04	0.755174	0.194468	5.92309e-05	0.000150999	585.884	31.0499	425.501	107.018	Y	Y	2	yellow
UMAG_06480	KIS71551	hypothetical protein	32.3361	18.1436	25.2398	0.754984	0.300124	0.00660885	0.0120262	34.5561	4.8518	24.2947	5.67876	Y	Y	2	light-green
UMAG_03000	KIS69020	hypothetical protein	237.654	137.973	187.814	0.754845	0.191821	4.80345e-05	0.000124221	167.768	33.8671	122.793	15.2067	Y	Y	0	burlywood
UMAG_10901	KIS67457	probable polyubiquitin	2194.33	1284.93	1739.63	0.754306	0.146308	1.47982e-07	5.36758e-07	2145.82	175.08	1584.1	188.461	Y	Y	0	beige
UMAG_11162	KIS67051	probable NADH dehydrogenase (ubiquinone) 49K chain	1259.78	741.69	1000.74	0.752648	0.119333	1.68584e-10	8.6364e-10	599.206	53.6483	446.263	21.6801	Y	Y	0	yellow
UMAG_12044	KIS65737	probable TIM9 - Translocase of the mitochondrial Inner Membrane	85.7282	49.518	67.6231	0.750942	0.220123	0.000373309	0.000837062	211.374	39.0415	155.471	30.259	Y	Y	0	yellow
UMAG_12134	KIS71441	hypothetical protein	108.551	62.969	85.7597	0.750332	0.206448	0.000161848	0.00038242	50.8748	10.9349	37.4933	3.83346	Y	Y	2	salmon
UMAG_03775	KIS68196	related to MCR1 - cytochrome-b5 reductase	417.353	245.798	331.575	0.750254	0.128984	3.55194e-09	1.57053e-08	266.293	19.5088	198.636	8.89134	Y	Y	0	yellow
UMAG_11615	KIS72271	related to anaphase promoting complex subunit 10	34.1311	19.3891	26.7601	0.749565	0.280174	0.00422699	0.00797265	24.9202	2.46855	18.0129	1.57695	N	Y	0.5	green
UMAG_10868	KIS70584	hypothetical protein	164.561	96.0894	130.325	0.748661	0.17612	1.25954e-05	3.57028e-05	106.177	5.93697	78.9573	17.1486	N	Y	8	light-cyan
UMAG_11277	KIS71169	hypothetical protein	742.219	438.049	590.134	0.748635	0.122761	6.39271e-10	3.1027e-09	749.427	47.8042	559.15	43.8633	Y	Y	0.5	dark-green
UMAG_02088	KIS69550	probable ADK1 - adenylate kinase	681.666	401.429	541.548	0.748476	0.13787	3.3683e-08	1.33738e-07	509.031	60.359	378.72	23.5615	Y	Y	0	yellow
UMAG_10879	KIS70616	hypothetical protein	91.1073	52.7264	71.9169	0.74829	0.222521	0.000445677	0.000989373	167.286	30.8047	122.777	21.3168	Y	Y	0	pink
UMAG_05953	KIS66217	hypothetical protein	297.557	173.861	235.709	0.748133	0.18354	2.67201e-05	7.21621e-05	335.534	35.5277	246.887	51.6267	Y	Y	0.5	dark-green
UMAG_10104	KIS71989	probable GCY1 - galactose-induced protein of aldo/keto reductase family	96.7665	56.287	76.5268	0.747552	0.203671	0.000141493	0.000338033	70.4909	9.74558	52.0433	8.13539	Y	Y	0	yellow
UMAG_11589	KIS65901	probable RPL17A - ribosomal protein L17.e	551.771	322.18	436.975	0.74697	0.1875	3.96082e-05	0.000103734	656.938	77.9409	484.803	110.182	Y	Y	0	yellow
UMAG_00009	KIS71563	related to TMA20 - Protein putative involved in cytoplasmic ribosome function	336.77	198.354	267.562	0.746747	0.144731	1.45452e-07	5.28173e-07	380.792	35.4555	283.357	15.1337	Y	Y	0	yellow
UMAG_12014	KIS71558	related to PGC1 - phosphatidyl glycerol phospholipase C	371.753	219.051	295.402	0.746499	0.144374	1.38545e-07	5.05078e-07	234.606	16.0219	174.709	23.3444	Y	Y	1	magenta
UMAG_06043	KIS65954	related to amidase	87.2674	50.5814	68.9244	0.746218	0.21742	0.000352525	0.000794042	31.2612	2.94338	22.8938	5.97475	N	Y	4	cyan
UMAG_11948	KIS69127	related to ubiquitin-like protein Hub1	21.2924	11.7738	16.5331	0.746085	0.359733	0.0206412	0.0338261	64.5609	14.3424	45.3521	9.45275	Y	Y	4	magenta
UMAG_05387	KIS66394	probable MAK16 protein	199.163	115.355	157.259	0.744996	0.230638	0.000710276	0.00152694	130.828	16.7026	95.06	29.8474	Y	Y	2	magenta
UMAG_03556	KIS68469	hypothetical protein	37.2226	20.895	29.0588	0.74443	0.32506	0.01213	0.0209294	65.2582	26.7613	45.3556	4.57249	Y	Y	0.5	dark-green
UMAG_04939	KIS67071	probable arginase	980.672	575.339	778.006	0.743519	0.1764	1.46882e-05	4.11832e-05	680.503	47.8153	504.509	121.223	Y	Y	0	burlywood
UMAG_04751	KIS66687	related to RRS1 - regulator of ribosome biogenesis	237.497	139.434	188.465	0.742825	0.181138	2.41875e-05	6.58172e-05	155.733	14.2409	114.99	21.3528	Y	Y	2	yellow
UMAG_02235	KIS69707	related to AMP-binding protein	98.038	56.749	77.3935	0.742566	0.230788	0.00075202	0.00161183	36.4157	4.72791	26.905	7.8411	Y	Y	0	burlywood
UMAG_01826	KIS70664	hypothetical protein	220.009	129.239	174.624	0.742501	0.175568	1.38765e-05	3.90768e-05	29.8513	3.80715	22.1194	3.94602	N	Y	0	beige
UMAG_12182	KIS69563	hypothetical protein	93.9699	54.9353	74.4526	0.742475	0.192	6.53568e-05	0.000166026	61.3934	6.87923	45.5302	6.30324	Y	Y	0	pink
UMAG_00381	KIS71955	probable NADH2 dehydrogenase (ubiquinone) 40K chain	1324.67	784.989	1054.83	0.741959	0.12519	1.84377e-09	8.42343e-09	755.675	92.4518	566.068	10.5877	Y	Y	0	yellow
UMAG_05665	KIS66879	related to curved dna-binding protein	807.496	477.149	642.323	0.740747	0.149465	4.30086e-07	1.48734e-06	468.083	61.1605	350.242	31.2913	Y	Y	0	yellow
UMAG_04190	KIS67689	hypothetical protein	1588.91	942.851	1265.88	0.740613	0.123105	1.07704e-09	5.0786e-09	1137.53	64.3981	853.559	84.3565	Y	Y	1	light-cyan
UMAG_04928	KIS67055	hypothetical protein	755.499	403.081	579.29	0.73999	0.426585	0.0413352	0.0635321	156.385	28.3882	104.723	55.2923	N	Y	8	magenta
UMAG_04740	KIS66677	related to COQ3 - O-methyltransferase involved in ubiquinone biosynthesis	30.0407	16.9375	23.4891	0.739737	0.31464	0.010523	0.0183117	20.71	5.20003	14.5609	3.39434	N	Y	0.5	dark-green
UMAG_01750	KIS70583	hypothetical protein	25.6391	14.1609	19.9	0.739472	0.370683	0.0248761	0.0400748	14.485	5.91049	10.161	1.54352	N	N	0.5	#N/A
UMAG_10988	KIS67509	probable clathrin coat assembly protein ap17	82.8796	47.9484	65.414	0.73916	0.241704	0.0012946	0.00267619	128.886	27.6805	95.2074	24.0428	Y	Y	12	cyan
UMAG_01872	KIS70716	related to gmc type oxidoreductase	943.315	559.394	751.354	0.738244	0.135648	3.17271e-08	1.26127e-07	335.586	24.0071	253.194	43.7517	Y	Y	8	light-cyan
UMAG_04379	KIS67277	related to gibberellin 20-oxidase	23.3523	12.9615	18.1569	0.737853	0.362317	0.0227505	0.0369824	12.8984	3.0445	9.0804	3.25478	Y	Y	0.5	#N/A
UMAG_04869	KIS66809	related to Translation initiation factor eIF-2B epsilon subunit	390.921	232.119	311.52	0.737133	0.134384	2.49761e-08	1.00901e-07	106.703	10.8303	80.3018	6.89669	Y	Y	2	light-green
UMAG_00650	KIS72236	related to Progesterone 5-beta-reductase	79.5861	46.3156	62.9508	0.736306	0.234798	0.000999143	0.0021038	45.6064	11.9216	33.6061	3.24562	Y	Y	0.5	dark-green
UMAG_04054	KIS68013	probable NBP35 - nucleotide-binding protein	151.251	88.4568	119.854	0.735943	0.214656	0.000356654	0.000802782	82.1724	20.0795	60.8561	10.758	Y	Y	12	burlywood
UMAG_02642	KIS69299	hypothetical protein	111.679	65.1829	88.431	0.73513	0.228421	0.000752854	0.00161255	115.79	27.4115	85.6553	14.8228	Y	Y	12	light-cyan
UMAG_00263	KIS71833	related to carnitine/acylcarnitine translocase	111.962	65.4056	88.6839	0.735103	0.217022	0.000416656	0.000927817	55.7227	13.9131	41.3415	5.65472	Y	Y	1	dark-green
UMAG_10540	KIS67365	related to blue-light-inducible Bli-3 protein	71.6341	41.8069	56.7205	0.734927	0.221311	0.00053076	0.00116306	79.0127	11.3896	58.4715	10.9755	Y	Y	1	red
UMAG_02516	KIS69165	hypothetical protein	241.29	142.381	191.835	0.734732	0.181182	2.98318e-05	7.98316e-05	213.69	6.88996	159.338	35.9493	Y	Y	0	yellow
UMAG_06376	KIS65674	probable GTP-binding protein SAR1	394.796	234.889	314.842	0.734588	0.136433	4.39553e-08	1.71987e-07	465.539	32.2806	349.865	19.4157	Y	Y	4	light-green
UMAG_01736	KIS70568	hypothetical protein	138.087	81.4828	109.785	0.733624	0.179649	2.66659e-05	7.20459e-05	102.956	11.11	77.0882	11.5746	Y	Y	0	yellow
UMAG_02468	KIS69956	hypothetical protein	147.828	87.2278	117.528	0.733584	0.180255	2.82346e-05	7.59665e-05	66.4189	9.74997	49.4979	6.34071	Y	Y	0.5	burlywood
UMAG_01967	KIS70819	related to AIF1 - mitochondrial cell death effector	347.389	206.651	277.02	0.733161	0.13917	8.37173e-08	3.13697e-07	196.99	21.4196	148.753	14.2144	Y	Y	8	cyan
UMAG_12009	KIS67061	hypothetical protein	112.44	66.2773	89.3587	0.732618	0.183082	3.7972e-05	9.97556e-05	63.9351	3.18578	48.1064	9.37019	Y	Y	8	cyan
UMAG_05502	KIS66509	related to MRPL17 - mitochondrial ribosomal protein	123.982	73.2088	98.5953	0.732549	0.187255	5.4614e-05	0.000139892	88.8822	8.37996	65.9646	9.4912	Y	Y	0	yellow
UMAG_02499	KIS69987	hypothetical protein	231.278	136.968	184.123	0.732001	0.172436	1.31133e-05	3.7073e-05	108.775	12.1813	81.6194	14.054	Y	Y	2	yellow
UMAG_04703	KIS66641	probable phosphomannomutase	291.07	172.721	231.895	0.73165	0.163186	4.42033e-06	1.33937e-05	239.844	23.4585	179.836	28.4997	Y	Y	12	salmon
UMAG_06413	KIS65713	hypothetical protein	146.619	86.9553	116.787	0.731418	0.171041	1.142e-05	3.25853e-05	109.21	10.5115	81.7215	7.55699	Y	Y	0	yellow
UMAG_03865	KIS68284	probable SEC4-like Rab/GTPase	481.092	286.018	383.555	0.730868	0.154517	1.35715e-06	4.45035e-06	512.941	65.8117	385.968	44.5425	Y	Y	2	cyan
UMAG_01950	KIS70799	hypothetical protein	14.3599	7.71181	11.0358	0.730186	0.44018	0.0507848	0.0763308	8.11541	2.76532	5.61172	1.63053	N	N	1	beige
UMAG_02549	KIS69199	b-induced zinc finger protein	186.9	111.003	148.952	0.729985	0.161615	3.80697e-06	1.165e-05	53.506	7.63157	40.2806	2.96102	Y	Y	2	magenta
UMAG_01164	KIS71264	hypothetical protein	39.8172	22.6283	31.2228	0.729821	0.311699	0.0109098	0.0189404	28.4345	8.85771	20.5074	7.22328	Y	Y	0	burlywood
UMAG_10010	KIS71592	related to EMI5 - protein required for transcriptional induction of TF IME1	113.216	66.9449	90.0802	0.72944	0.184243	4.53895e-05	0.000117852	106.408	14.3412	79.6301	8.14291	Y	Y	8	cyan
UMAG_11612	KIS72260	hypothetical protein (C-terminal fragment)	371.198	220.332	295.765	0.729207	0.170285	1.1138e-05	3.1837e-05	150.321	19.344	112.68	16.847	N	N	2	red
UMAG_04227	KIS67729	hypothetical protein	634.067	375.618	504.843	0.728823	0.180479	3.23295e-05	8.58752e-05	305.837	47.5069	228.422	44.7329	Y	Y	0	yellow
UMAG_02733	KIS69399	related to SMI1 - beta-1	617.416	364.402	490.909	0.728816	0.195929	0.000119023	0.000287651	182.831	36.6386	136.652	32.6218	Y	Y	1	red
UMAG_05575	KIS66587	hypothetical protein	252.933	149.614	201.273	0.727836	0.189374	7.28038e-05	0.000184075	95.3021	11.0051	71.3548	17.7043	Y	Y	12	light-cyan
UMAG_00274	KIS71845	probable casein kinase I	790.222	468.855	629.538	0.727201	0.177053	2.41006e-05	6.56088e-05	371.375	25.2573	279.32	69.5213	Y	Y	2	yellow
UMAG_02018	KIS70874	related to SAC1 - Phosphatidylinositol phosphate phosphatase	447.639	266.127	356.883	0.727025	0.165014	6.38788e-06	1.89553e-05	122.564	9.32624	92.83	20.8132	Y	Y	1	red
UMAG_03632	KIS68546	related to SEC6 - protein transport protein	269.267	160.479	214.873	0.726826	0.150039	7.78685e-07	2.62679e-06	69.3666	5.77972	52.6341	9.00736	Y	Y	2	magenta
UMAG_04736	KIS66673	related to VPS20 - myristoylated subunit of the endosomal sorting complex	144.008	85.5752	114.791	0.726355	0.175595	2.13415e-05	5.86915e-05	150.033	16.811	112.877	11.4864	Y	Y	4	salmon
UMAG_02577	KIS69228	probable 6-phosphogluconate dehydrogenase	5222.25	3133.17	4177.71	0.725378	0.119094	6.87055e-10	3.32214e-09	2375.09	215.943	1799.05	100.053	Y	Y	0	yellow
UMAG_03103	KIS69129	probable ribose-5-phosphate isomerase	349.65	208.16	278.905	0.725266	0.165577	7.08451e-06	2.08406e-05	483.4	56.4116	364.862	62.6218	Y	Y	4	magenta
UMAG_04149	KIS67645	hypothetical protein	24.8763	13.8323	19.3543	0.724595	0.372952	0.0286746	0.045625	24.4278	10.3678	17.1737	4.53017	Y	Y	0.5	light-cyan
UMAG_11973	KIS67930	probable NIT2 - nitrilase	76.4969	45.2527	60.8748	0.723185	0.204536	0.000245535	0.000565475	58.7635	3.90882	44.1983	5.16145	Y	Y	8	cyan
UMAG_01333	KIS71434	hypothetical protein	68.0305	40.1193	54.0749	0.723178	0.212145	0.000393832	0.000880026	70.0751	7.34524	52.1967	6.25663	Y	Y	6	cyan
UMAG_06239	KIS65864	related to phosphatidylinositol 3-phosphate 5-kinase	609.816	364.662	487.239	0.723141	0.149169	7.64693e-07	2.58229e-06	53.5892	5.45067	40.7291	7.35635	N	Y	6	magenta
UMAG_04580	KIS67482	hypothetical protein	176.553	104.355	140.454	0.721259	0.212656	0.000416456	0.000927692	116.976	26.5331	88.2079	16.6892	Y	Y	4	magenta
UMAG_04789	KIS66725	related to ESF2 - essential nucleolar protein involved in pre-18S rRNA processing	177.923	104.964	141.444	0.720629	0.225542	0.000831089	0.00176606	93.4962	16.3356	69.2883	19.6458	Y	Y	2	green-yellow
UMAG_11199	KIS72357	related to CDC28 - cyclin-dependent protein kinase	164.543	98.1662	131.354	0.720612	0.165394	8.12843e-06	2.3653e-05	58.4938	2.17361	44.4911	8.77668	Y	Y	0.5	red
UMAG_03948	KIS67894	hypothetical protein	18.7271	10.3073	14.5172	0.719821	0.404426	0.0407738	0.0627887	15.9478	7.16382	11.3711	0.833568	N	N	1	#N/A
UMAG_01551	KIS70381	probable BUD23 - Protein involved in bud-site selection	217.673	129.437	173.555	0.719691	0.19602	0.000145314	0.000346266	162.978	8.08583	122.154	30.3007	Y	Y	2	green-yellow
UMAG_10088	KIS71857	related to Acetoacetyl-CoA synthetase	39.2716	22.6731	30.9723	0.719295	0.291531	0.00793531	0.0142316	11.8277	2.64121	8.63392	2.47305	N	N	0	burlywood
UMAG_11345	KIS71919	hypothetical protein	168.115	99.6359	133.876	0.719265	0.209981	0.000368755	0.000828001	128.757	23.8421	96.9038	20.9001	Y	Y	12	cyan
UMAG_01016	KIS71105	hypothetical protein	124.738	73.7676	99.2528	0.718177	0.225918	0.000881016	0.00186847	81.7051	14.8219	60.7482	14.2242	Y	Y	0	yellow
UMAG_11262	KIS70945	related to YKE2 - Gim complex component	54.9093	32.1132	43.5113	0.717664	0.26196	0.00363453	0.00692598	107.22	30.0641	78.828	0.460179	Y	Y	0	pink
UMAG_10162	KIS69958	related to Transformer-2 protein homolog	379.461	227.744	303.603	0.717607	0.153715	1.86472e-06	5.98414e-06	251.038	39.0476	190.294	13.6658	Y	Y	0	yellow
UMAG_02263	KIS69740	hypothetical protein	157.36	93.3374	125.349	0.713904	0.214565	0.000531545	0.00116439	116.211	11.7969	88.0333	28.3116	Y	Y	1	light-cyan
UMAG_12135	KIS71444	related to MOB2 - required for maintenance in ploidy	251.02	151.632	201.326	0.712364	0.137539	1.38826e-07	5.0582e-07	201.426	8.91493	154.209	7.38909	Y	Y	2	magenta
UMAG_00366	KIS71939	probable MCM6 - involved in replication	368.169	222.498	295.334	0.711966	0.13496	8.25619e-08	3.09727e-07	84.1338	6.07528	64.3979	6.35853	Y	Y	0	yellow
UMAG_01088	KIS71179	probable COQ5 - ubiquinone biosynthesis	548.444	331.88	440.162	0.710813	0.130602	3.29231e-08	1.30802e-07	315.436	29.2387	241.798	26.9803	Y	Y	0	yellow
UMAG_02150	KIS69615	probable xylitol dehydrogenase	221.455	133.232	177.344	0.710464	0.168407	1.51867e-05	4.24886e-05	127.655	18.0661	97.3627	8.34006	Y	Y	4	magenta
UMAG_10862	KIS66219	probable UBC6 - E2 ubiquitin-conjugating enzyme	246.979	149.4	198.19	0.710236	0.136652	1.26443e-07	4.63575e-07	186.486	12.4369	143.004	5.35805	Y	Y	2	light-green
UMAG_05847	KIS66107	probable TYS1 - tyrosyl-tRNA synthetase	325.399	196.147	260.773	0.710155	0.158178	4.4264e-06	1.34058e-05	152.205	22.516	116.318	8.95002	Y	Y	0	yellow
UMAG_11687	KIS70416	hypothetical protein	101.652	60.6201	81.1362	0.709689	0.205694	0.000343292	0.000774429	43.9353	7.09549	33.4063	6.18196	Y	Y	0	green
UMAG_10213	KIS66385	probable H -transporting ATP synthase alpha chain	7361.03	4457.18	5909.1	0.709685	0.126097	1.0812e-08	4.55019e-08	3031.05	380.697	2321.85	88.503	Y	Y	0	yellow
UMAG_02010	KIS70865	related to family II 2-keto-3-deoxy-D-arabino-heptulosonate 7-phosphate synthase	436.415	262.868	349.641	0.708569	0.169023	1.70567e-05	4.74689e-05	165.701	11.4248	125.923	24.1398	Y	Y	0	yellow
UMAG_02613	KIS69266	probable cysteinyl-tRNA synthetase	399.151	240.261	319.706	0.708317	0.170104	1.93816e-05	5.35065e-05	108.574	23.88	82.9398	9.70713	Y	Y	2	yellow
UMAG_01422	KIS71527	probable Lipase B precursor	167.371	100.545	133.958	0.708292	0.182087	6.19415e-05	0.000157598	111.386	6.35992	84.8532	19.1647	Y	Y	0.5	dark-green
UMAG_06032	KIS65944	related to MGR2 û subunit of the TIM23 translocase complex	170.144	102.11	136.127	0.708262	0.19328	0.000151474	0.000359751	304.499	34.6801	230.047	37.761	Y	Y	0	yellow
UMAG_11563	KIS67143	hypothetical protein	299.346	180.698	240.022	0.707889	0.158091	4.69563e-06	1.41548e-05	268.314	44.5897	205.436	10.6621	Y	Y	0	yellow
UMAG_11468	KIS69562	related to PSD1 - phosphatidylserine decarboxylase 1	169.622	101.683	135.652	0.707888	0.186401	9.01307e-05	0.000223854	59.3287	6.24187	45.4739	10.5889	Y	Y	2	yellow
UMAG_03361	KIS68795	probable SEC26 - coatomer complex beta chain of secretory pathway vesicles	730.179	438.727	584.453	0.707704	0.181411	5.891e-05	0.0001503	166.547	15.5523	127.179	32.6364	Y	Y	2	light-green
UMAG_00610	KIS72193	hypothetical protein	131.929	79.2466	105.588	0.70759	0.189577	0.000116646	0.000282435	100.57	13.4491	76.2902	11.0695	Y	Y	12	light-cyan
UMAG_02198	KIS69666	hypothetical protein	109.342	65.1078	87.2251	0.707339	0.22239	0.000893704	0.00189414	82.6718	11.2076	62.5866	17.5391	Y	Y	8	light-cyan
UMAG_11043	KIS66170	related to small nuclear ribonucleoprotein sm d3	87.0184	51.5906	69.3045	0.706797	0.237472	0.00176713	0.00357857	143.243	39.2425	107.855	22.1605	Y	Y	0	pink
UMAG_02709	KIS69374	probable HHT1 - histone H3	86.0178	51.5321	68.7749	0.706228	0.203094	0.000311604	0.000707684	141.378	20.8176	106.575	12.4	Y	Y	0	yellow
UMAG_02760	KIS69429	related to DNA polymerase epsilon subunit B	128.086	77.0587	102.572	0.704922	0.185797	9.18067e-05	0.000227492	45.361	8.47583	34.6203	2.19725	Y	Y	0	yellow
UMAG_05521	KIS66528	hypothetical protein	555.489	335.883	445.686	0.704884	0.161657	8.07928e-06	2.35206e-05	204.52	19.7332	156.332	28.774	Y	Y	0.5	dark-green
UMAG_04020	KIS67975	hypothetical protein	150.189	89.0711	119.63	0.704253	0.251076	0.00301436	0.00584241	180.772	11.9833	133.623	51.773	Y	Y	0	yellow
UMAG_01521	KIS70351	Dihydroorotase	414.868	251.648	333.258	0.703972	0.148243	1.28051e-06	4.21399e-06	235.352	26.5997	180.319	18.1734	Y	Y	2	yellow
UMAG_10254	KIS70660	hypothetical protein	232.803	141.063	186.933	0.703525	0.157751	5.12778e-06	1.54072e-05	145.6	13.9187	111.561	11.8093	Y	Y	0	burlywood
UMAG_10545	KIS66251	hypothetical protein	20.7841	11.817	16.3005	0.703393	0.369434	0.0322701	0.050782	15.4819	2.23752	11.1347	4.33051	N	Y	1	red
UMAG_02657	KIS69316	related to NMT1 - N-myristoyltransferase	375.55	227.724	301.637	0.703334	0.149964	1.71451e-06	5.53234e-06	118.982	13.134	91.4888	13.3766	Y	Y	0	yellow
UMAG_04851	KIS66790	related to DOT5 - nuclear thiol peroxidase	40.5774	23.6383	32.1078	0.70287	0.310291	0.0137395	0.0234435	44.985	11.7212	33.1788	10.3484	Y	Y	0	yellow
UMAG_01962	KIS70814	related to GAL1 - galactokinase	344.758	209.459	277.108	0.702815	0.142931	5.51659e-07	1.88856e-06	140.269	18.3053	107.855	5.45537	Y	Y	12	blue
UMAG_11896	KIS70510	probable NADH-ubiquinone oxidoreductase 30.4 kDa subunit	786.253	479.729	632.991	0.70178	0.116962	1.2427e-09	5.80466e-09	601.252	40.8787	464.705	27.7977	Y	Y	0	yellow
UMAG_11791	KIS66562	related to TRS31 - TRAPP subunit of 31 kDa involved in targeting and fusion of ER to golgi transport vesicles	205.081	123.647	164.364	0.701759	0.187306	0.000111187	0.000270637	134.982	11.6091	102.78	24.168	Y	Y	12	cyan
UMAG_00986	KIS71075	small G-protein Ras1	1087.99	659.765	873.879	0.7017	0.156302	4.459e-06	1.34919e-05	1126.58	158.777	867.923	125.143	Y	Y	2	yellow
UMAG_02028	KIS70884	related to acyl-coenzyme A oxidase 1	75.7511	45.3727	60.5619	0.701184	0.212156	0.000587836	0.00127773	23.6111	4.1412	17.9217	2.30402	N	Y	0	burlywood
UMAG_11370	KIS70576	hypothetical protein	55.9606	33.2561	44.6083	0.699253	0.249893	0.00312955	0.00604211	21.6862	4.39326	16.3791	2.80766	N	Y	0	pink
UMAG_11510	KIS67822	related to RIM20 - protein involved in proteolytic activation of Rim101p	367.096	223.763	295.43	0.699051	0.133683	1.08322e-07	4.01697e-07	94.6135	8.52415	73.1818	9.13593	Y	Y	12	cyan
UMAG_03362	KIS68796	hypothetical protein	174.627	105.833	140.23	0.698236	0.169797	2.46587e-05	6.6987e-05	100.544	14.2657	77.4849	10.955	Y	Y	8	cyan
UMAG_01595	KIS70418	related to RPC17 - RNA polymerase III subunit C17	86.7226	52.1015	69.4121	0.69808	0.211459	0.000597238	0.00129642	70.3601	12.746	53.5655	6.11138	Y	Y	0	yellow
UMAG_06341	KIS70256	related to Peroxisomal membrane protein PEX16	88.0575	52.7807	70.4191	0.697823	0.212997	0.000654443	0.00141395	37.1357	2.21128	28.4287	8.57073	Y	Y	0	burlywood
UMAG_01177	KIS71277	related to MSF1 - phenylalanine--tRNA ligase alpha chain	646.449	396.21	521.329	0.697301	0.105985	3.01629e-11	1.65832e-10	277.016	12.9211	214.978	8.17939	Y	Y	0	yellow
UMAG_02630	KIS69287	hypothetical protein / related to thiamin pyrophosphokinase	402.219	245.68	323.949	0.697273	0.13147	7.2588e-08	2.75026e-07	64.6929	5.83146	50.0918	4.44958	N	Y	4	cyan
UMAG_04593	KIS67496	hypothetical protein	150.924	91.6865	121.305	0.696967	0.170605	2.76407e-05	7.45153e-05	143.286	14.2726	109.932	10.1555	Y	Y	0	yellow
UMAG_12117	KIS71000	hypothetical protein	88.2693	53.276	70.7727	0.695688	0.205966	0.000454543	0.00100767	104.531	16.6815	79.7862	4.26332	Y	Y	0	burlywood
UMAG_03309	KIS68741	related to DOA1 - involved in ubiquitin-dependent proteolysis	692.344	422.26	557.302	0.695415	0.146719	1.36192e-06	4.46373e-06	187.64	7.79497	145.775	29.9882	Y	Y	6	salmon
UMAG_11256	KIS70928	related to D-arabinitol 2-dehydrogenase	739.646	448.034	593.84	0.695209	0.182403	8.63026e-05	0.00021559	472.47	23.3332	366.043	123.491	Y	Y	1	dark-green
UMAG_11151	KIS67271	related to Type I protein geranylgeranyltransferase beta subunit	127.323	77.2706	102.297	0.695059	0.170106	2.78066e-05	7.48772e-05	70.4719	2.15955	54.4187	8.8794	Y	Y	2	light-green
UMAG_10371	KIS69081	related to LST8 - required for transport of permeases from the golgi to the plasma membrane	202.955	123.093	163.024	0.694672	0.180765	7.65506e-05	0.000192945	113.623	17.5528	87.8877	14.326	Y	Y	0	yellow
UMAG_01265	KIS71364	related to RNA-binding protein	66.4791	40.0468	53.2629	0.694656	0.215959	0.000806374	0.00171693	49.8401	4.53072	37.9261	3.55963	Y	Y	4	cyan
UMAG_10255	KIS70676	hypothetical protein	236.22	142.797	189.509	0.694358	0.19753	0.000274712	0.000628636	81.8014	6.5177	62.7022	17.6029	Y	Y	8	magenta
UMAG_10385	KIS68588	probable 3-deoxy-D-arabino-heptulosonate 7-phosphate (DAHP) synthase isoenzyme	897.435	549.807	723.621	0.694173	0.125436	1.99175e-08	8.12293e-08	486.528	48.4621	377.726	22.8085	Y	Y	0	yellow
UMAG_10986	KIS67504	hypothetical protein	66.2229	39.756	52.9894	0.69364	0.229349	0.00154058	0.00314743	58.6902	9.97206	44.5206	8.05883	Y	Y	2	magenta
UMAG_11453	KIS72233	probable UBC5 - E2 ubiquitin-conjugating enzyme	61.3332	36.8793	49.1062	0.693284	0.224679	0.00126136	0.00261	90.6344	10.995	69.7512	6.38827	Y	Y	0	yellow
UMAG_02353	KIS69831	probable 40S ribosomal protein S9	1130.01	685.309	907.661	0.693212	0.185511	0.000116174	0.000281609	1296.28	117.694	998.2	256.127	Y	Y	0	yellow
UMAG_06445	KIS65742	hypothetical protein	168.093	102.506	135.299	0.691112	0.164523	1.69439e-05	4.72005e-05	138.882	14.3834	107.386	11.9007	Y	Y	0	pink
UMAG_01619	KIS70443	related to GUT2 - glycerol-3-phosphate dehydrogenase	814.946	500.799	657.872	0.690809	0.122156	9.99245e-09	4.22456e-08	212.486	14.9229	165.069	14.6601	Y	Y	0	burlywood
UMAG_01234	KIS71334	hypothetical protein	564.987	345.505	455.246	0.68994	0.152619	3.89967e-06	1.19167e-05	286.921	43.4312	222.719	35.8223	Y	Y	1	red
UMAG_05715	KIS66932	related to ACT1 - actin	238.748	144.893	191.82	0.689851	0.196103	0.000272645	0.000624348	99.9966	7.92929	76.8535	21.3418	Y	Y	0	yellow
UMAG_00890	KIS70972	hypothetical protein	317.88	193.201	255.541	0.689762	0.184672	0.00011846	0.000286611	124.538	22.9128	96.2657	22.1507	Y	Y	8	beige
UMAG_00020	KIS71574	related to l-azetidine-2-carboxylic acid acetyltransferase	138.353	84.0528	111.203	0.689699	0.194965	0.000253636	0.000583716	110.253	14.445	84.5485	15.3657	Y	Y	0.5	dark-green
UMAG_11178	KIS66596	related to U2 small nuclear ribonucleoprotein B	74.1729	44.9432	59.5581	0.689473	0.200949	0.000379526	0.000849823	64.4797	3.58952	49.3917	4.57609	Y	Y	0	yellow
UMAG_05103	KIS70029	probable sulfate adenylyltransferase	825.749	505.289	665.519	0.689195	0.155461	5.90571e-06	1.76217e-05	320.968	56.7999	249.521	18.4164	Y	Y	0	yellow
UMAG_04470	KIS67368	probable branching enzyme (be1)	558.112	342.508	450.31	0.688044	0.140339	6.07135e-07	2.0697e-06	178.698	9.12649	139.466	24.8217	Y	Y	0	pink
UMAG_02891	KIS68905	hypothetical protein	144.741	87.7264	116.234	0.687906	0.205152	0.000501651	0.00110452	41.0643	8.42744	31.6381	5.12677	Y	Y	2	magenta
UMAG_06443	KIS65738	probable TIF6 - translation initiation factor 6 (eIF6)	491.21	300.893	396.052	0.686325	0.160463	1.18174e-05	3.36303e-05	446.051	58.7583	344.173	48.3785	Y	Y	0	yellow
UMAG_01466	KIS70291	related to acyl-coa dehydrogenase	955.117	588.456	771.787	0.685637	0.132504	1.50035e-07	5.4329e-07	405.18	20.0539	315.266	30.6315	Y	Y	0.5	dark-green
UMAG_06450	KIS65747	cAMP-dependent protein kinase type II regulatory chain	525.297	321.045	423.171	0.682978	0.183761	0.000128054	0.000307977	223.958	15.973	173.738	45.9921	Y	Y	0	burlywood
UMAG_01835	KIS70675	related to carnitine acetyl transferase FacC	860.159	529.568	694.864	0.681073	0.154388	6.59054e-06	1.94762e-05	252.189	27.7831	195.894	31.0526	Y	Y	1	dark-green
UMAG_01804	KIS70639	tryptophan amino transferase (transaminase)	1014.06	626.036	820.046	0.680848	0.138799	6.01089e-07	2.05018e-06	450.798	33.7829	350.905	34.8169	Y	Y	4	cyan
UMAG_11204	KIS66009	related to ubiquitin-activating enzyme	193.559	118.906	156.232	0.680472	0.16712	2.99928e-05	8.01961e-05	102.894	12.6379	80.3527	11.4349	Y	Y	0	yellow
UMAG_05907	KIS66167	related to RSM23 - mitochondrial ribosomal protein of the small subunit	454.517	280.578	367.547	0.680465	0.142332	1.12496e-06	3.71726e-06	216.497	21.4922	168.695	10.1547	Y	Y	0	yellow
UMAG_03902	KIS67845	related to 5-oxoprolinase	504.902	311.339	408.12	0.680356	0.146235	2.11844e-06	6.74144e-06	141.589	24.5582	110.498	8.51825	Y	Y	0	yellow
UMAG_04134	KIS67631	probable methionine synthase	291.101	178.694	234.897	0.679837	0.173747	5.81543e-05	0.00014843	165.036	30.1911	128.181	14.3702	Y	Y	0.5	light-cyan
UMAG_00749	KIS72343	related to lipase	53.6274	32.0755	42.8514	0.679198	0.275953	0.00851509	0.0151411	17.4275	3.65942	13.149	4.1373	N	N	0	yellow
UMAG_12276	KIS67545	hypothetical protein	129.424	77.8741	103.649	0.678316	0.256722	0.00509588	0.0094814	60.885	11.7352	46.7369	17.4018	Y	Y	0	burlywood
UMAG_04016	KIS67971	hypothetical protein	102.736	62.2845	82.5102	0.67819	0.232919	0.00225376	0.00446742	64.4767	14.0322	49.5923	13.8806	Y	Y	0	pink
UMAG_11696	KIS70433	related to SCS2 - required for inositol metabolism	608.306	376.2	492.253	0.677014	0.143618	1.57397e-06	5.11202e-06	468.757	58.6782	366.998	45.9026	Y	Y	0	burlywood
UMAG_04785	KIS66721	related to protein hus1	219.496	135.356	177.426	0.676463	0.16354	2.27724e-05	6.23346e-05	171.692	19.0753	133.869	15.9515	Y	Y	0	yellow
UMAG_00978	KIS71065	probable RRP45 - Exosome complex exonuclease	145.075	89.1019	117.089	0.676209	0.188464	0.00021294	0.000494288	99.0877	16.9033	76.9387	7.87617	Y	Y	8	green
UMAG_00501	KIS72080	hypothetical protein	85.4951	51.532	68.5136	0.675191	0.257226	0.00540466	0.010004	58.2266	13.6756	44.5528	14.2553	Y	Y	2	magenta
UMAG_05928	KIS66192	hypothetical protein	1.79628	0.226975	1.01163	0.67502	1.03425	0.0942738	0.133141	1.01751	0.802836	0.233737	0.292425	N	N	4	cyan
UMAG_04594	KIS67497	related to TIM44 - mitochondrial inner membrane import receptor subunit	693.317	426.073	559.695	0.6741	0.189589	0.000241207	0.000556102	274.016	32.742	211.21	50.4334	Y	Y	0	yellow
UMAG_02338	KIS69817	related to PEP12 syntaxin (T-SNARE)	225.387	138.71	182.048	0.673962	0.185539	0.00017975	0.000421636	163.33	17.8879	127.088	26.3629	Y	Y	0.5	dark-green
UMAG_02376	KIS69858	probable anthranilate synthase component II	1725.02	1059.97	1392.5	0.673472	0.190165	0.000253803	0.000583891	466.854	44.3989	361.694	95.8002	Y	Y	4	cyan
UMAG_10183	KIS70073	related to SPS19 - peroxisomal 2	287.602	177.923	232.763	0.673304	0.158536	1.40341e-05	3.94863e-05	214.28	35.5897	167.4	9.57712	Y	Y	8	light-cyan
UMAG_01612	KIS70436	related to IML1 - subunit of the Seh1-associated complex	936.032	579.843	757.937	0.67275	0.152639	6.78856e-06	2.00247e-05	112.191	6.28656	87.7291	13.126	N	Y	8	cyan
UMAG_10075	KIS69699	related to ubiquitin related modifier URM1	39.4875	23.4245	31.456	0.672481	0.312183	0.0190222	0.0314601	81.7043	28.4285	62.0953	13.0544	Y	Y	0	pink
UMAG_11366	KIS70559	related to HTD2 - mitochondrial 3-hydroxyacyl-thioester dehydratase	93.164	56.2936	74.7288	0.672315	0.256609	0.00551916	0.010203	58.6055	13.3494	44.9293	14.3768	Y	Y	0.5	dark-green
UMAG_00654	KIS72240	probable ARL1 - ADP-ribosylation factor	31.5661	18.8195	25.1928	0.672284	0.310201	0.0184024	0.0305996	34.2478	5.38179	25.3384	7.13118	Y	Y	12	cyan
UMAG_01113	KIS71206	hypothetical protein	121.419	74.9232	98.171	0.672176	0.175052	7.97644e-05	0.000200497	54.1351	1.29606	42.4847	6.13449	Y	Y	2	yellow
UMAG_00428	KIS72006	hypothetical protein	48.0082	29.1564	38.5823	0.672155	0.239154	0.00313986	0.00605625	36.4749	2.98565	27.932	3.49063	Y	Y	6	magenta
UMAG_10548	KIS66277	probable H -transporting two-sector ATPase chain b precursor	945.351	584.7	765.025	0.671418	0.165457	3.20444e-05	8.5223e-05	877.414	162.337	686.934	55.981	Y	Y	0	yellow
UMAG_03294	KIS68727	hypothetical protein	16.9366	9.48375	13.2102	0.670942	0.428283	0.0666987	0.0976063	14.6014	5.20177	10.5306	5.17512	Y	N	2	magenta
UMAG_12168	KIS70668	hypothetical protein	155.353	95.5397	125.446	0.669496	0.197024	0.00043706	0.000971579	58.5727	13.8764	45.6099	5.91414	Y	Y	0.5	beige
UMAG_02079	KIS69541	probable 40S ribosomal protein S10	408.666	251.462	330.064	0.669103	0.197566	0.000454252	0.00100737	579.441	50.5625	451.147	124.015	Y	Y	0	yellow
UMAG_10809	KIS70368	hypothetical protein	29.7739	17.6986	23.7363	0.669066	0.313042	0.019968	0.0328226	69.8935	21.8068	53.4734	7.57484	Y	Y	2	yellow
UMAG_03875	KIS67818	hypothetical protein	36.6793	21.5568	29.1181	0.668871	0.343392	0.03084	0.0487821	98.8181	42.1251	72.9655	20.6567	Y	Y	4	cyan
UMAG_02926	KIS68941	hypothetical protein	824.662	514.717	669.69	0.668841	0.11907	1.27925e-08	5.3454e-08	728.069	40.7957	575.406	61.7768	Y	Y	2	light-green
UMAG_10153	KIS69910	probable 26S proteasome regulatory subunit Rpn10	1050.37	655.135	852.753	0.66856	0.12614	7.55857e-08	2.85215e-07	627.088	58.4353	494.928	19.2795	Y	Y	0	yellow
UMAG_10666	KIS68202	probable U5 snRNP 100 kD protein	116.56	71.572	94.066	0.667391	0.208646	0.000888911	0.0018846	37.6926	8.4409	29.3661	5.20604	N	Y	0	burlywood
UMAG_11886	KIS70454	hypothetical protein	1195.65	744.187	969.918	0.666296	0.150781	6.48505e-06	1.9226e-05	1120.59	123.918	880.598	116.831	Y	Y	1	red
UMAG_06362	KIS65659	related to Angio-associated migratory cell protein	397.922	247.574	322.748	0.666257	0.151707	7.37991e-06	2.1621e-05	199.374	30.1156	157.296	13.0388	Y	Y	0	yellow
UMAG_01085	KIS71176	probable RAD50 - DNA repair protein	153.924	94.5951	124.259	0.665492	0.21323	0.00115789	0.00240823	26.245	6.49052	20.5615	3.17378	N	Y	8	cyan
UMAG_12086	KIS71645	hypothetical protein	103.98	64.2893	84.1348	0.66546	0.18543	0.000216664	0.000502026	72.6285	10.0037	57.2641	5.86938	Y	Y	0	yellow
UMAG_00122	KIS71681	hypothetical protein	165.766	102.691	134.229	0.665192	0.177016	0.000111996	0.000272298	57.084	8.71473	44.9612	6.19228	Y	Y	0.5	dark-green
UMAG_01318	KIS71420	probable 40S ribosomal protein S12	1089.83	675.882	882.855	0.66482	0.175024	9.46232e-05	0.000233843	1667.48	317.215	1311.19	174.782	Y	Y	0	yellow
UMAG_04228	KIS67730	related to SSO1 - syntaxin-related protein	1075.56	671.127	873.343	0.664478	0.143041	2.232e-06	7.07148e-06	574.597	65.2576	453.396	43.0665	Y	Y	0	yellow
UMAG_02584	KIS69236	hypothetical protein	44.6809	27.0275	35.8542	0.66413	0.272949	0.00940929	0.016585	58.5795	16.3543	44.7655	8.03212	Y	Y	0.5	dark-green
UMAG_00380	KIS71954	related to MAG1 - 3-methyl-adenine DNA glycosylase	57.4918	35.1388	46.3153	0.663692	0.239153	0.00352852	0.00673788	28.6317	3.35736	22.3897	5.04426	N	Y	12	light-cyan
UMAG_01262	KIS71362	DNA polymerase X - putative	3918.32	2453.1	3185.71	0.66333	0.123538	5.17491e-08	2.00179e-07	1172	133.963	928.556	89.6177	Y	Y	1	red
UMAG_04509	KIS67410	related to Nucleoporin NSP1	326.869	201.539	264.204	0.663068	0.20907	0.000976913	0.00206237	107.741	33.4892	83.6831	4.67629	Y	Y	0	yellow
UMAG_10822	KIS70394	related to ATP12 - F1F0-ATPase complex assembly protein	162.534	100.88	131.707	0.662941	0.176287	0.000110962	0.000270191	131.299	15.657	103.468	18.1359	Y	Y	0	yellow
UMAG_11843	KIS70967	hypothetical protein	10.7746	5.95587	8.36526	0.662583	0.462109	0.0854837	0.12177	18.6217	5.36931	12.8666	2.6302	Y	Y	4	cyan
UMAG_03009	KIS69029	related to pyridoxamine-phosphate oxidase	287.489	178.627	233.058	0.66207	0.177197	0.000121852	0.000293717	255.836	51.7156	201.013	22.6979	Y	Y	4	cyan
UMAG_00789	KIS72386	probable carnitine O-acetyltransferase	442.112	276.378	359.245	0.662009	0.1428	2.34171e-06	7.39728e-06	152.592	20.3206	120.761	5.87726	Y	Y	0	pink
UMAG_00444	KIS72022	hypothetical protein	223.005	137.769	180.387	0.661478	0.201706	0.00067509	0.00145661	92.8388	17.4463	72.9575	18.2051	Y	Y	1	dark-green
UMAG_04226	KIS67728	probable RVB2 - RUVB-like protein	323.88	202.44	263.16	0.660569	0.146767	4.47787e-06	1.35426e-05	151.916	15.9517	120.77	13.3853	Y	Y	0	yellow
UMAG_03766	KIS68186	hypothetical protein	90.611	55.9512	73.2811	0.660027	0.202577	0.000733036	0.00157218	36.2334	3.94269	28.5704	6.60093	N	Y	0	salmon
UMAG_03815	KIS68233	probable MST1 - threonine--tRNA ligase	105.006	65.2648	85.1355	0.659684	0.180219	0.000165603	0.000390722	43.9339	4.63969	34.7041	3.56511	Y	Y	2	yellow
UMAG_04532	KIS67434	related to SNX41 - sorting nexin	435.938	270.956	353.447	0.659632	0.179563	0.00015676	0.000371207	153.482	8.65663	121.696	32.9147	Y	Y	1	green
UMAG_12050	KIS65746	probable ATP7 - F1F0-ATPase complex	711.844	447.45	579.647	0.659326	0.118253	1.64579e-08	6.77186e-08	932.527	51.4146	741.21	19.6518	Y	Y	0	yellow
UMAG_01670	KIS70499	related to MTR10 - involved in nuclear protein import	506.982	316.122	411.552	0.658805	0.169474	6.65986e-05	0.000168982	115.818	21.5565	91.3215	13.8039	Y	Y	2	light-green
UMAG_11947	KIS69125	hypothetical protein	24.872	14.6045	19.7383	0.65817	0.363338	0.0421852	0.0647154	62.4777	25.4191	46.3856	8.14663	Y	Y	4	green
UMAG_10142	KIS69877	probable CF25 - polyadenylation factor	28.7652	17.1985	22.9819	0.657034	0.318479	0.0242533	0.0391593	31.6272	10.2106	24.3407	3.70847	Y	Y	0	yellow
UMAG_12005	KIS66822	probable PRE2 - 20S core proteasome subunit (beta5) (C-terminal fragment)	413.231	259.191	336.211	0.657001	0.140294	1.88397e-06	6.04292e-06	326.787	33.6218	260.684	30.2673	Y	Y	0	pink
UMAG_06344	KIS70258	probable 2-methylcitrate dehydratase	1758.13	1107.3	1432.72	0.656606	0.115996	1.00773e-08	4.25764e-08	714.364	67.673	568.34	28.6977	Y	Y	0	burlywood
UMAG_12278	KIS67555	probable Dynein light chain 1	231.47	144.5	187.985	0.656486	0.173287	9.98058e-05	0.00024546	466.102	60.2162	369.411	56.3047	Y	Y	2	yellow
UMAG_00841	KIS70913	hypothetical protein	59.3109	36.4332	47.872	0.655657	0.234997	0.00341601	0.00653462	14.9225	2.2705	11.6322	2.65852	N	N	1	light-cyan
UMAG_11196	KIS66098	probable CDC9 - DNA ligase I	54.4182	33.2871	43.8527	0.65525	0.249501	0.00556417	0.0102757	14.3083	1.83451	11.2126	3.41621	N	N	0	yellow
UMAG_03759	KIS68179	probable COP9 signalosome subunit 5 CSN5	141.887	88.1386	115.013	0.655161	0.194727	0.000504298	0.00110959	77.9756	12.511	61.7938	12.5294	Y	Y	0	pink
UMAG_06419	KIS65719	hypothetical protein	3.84927	1.67942	2.76435	0.655022	0.703261	0.158257	0.209154	2.64845	0.633602	1.37566	0.248131	N	N	12	#N/A
UMAG_02333	KIS69812	hypothetical protein	60.1213	36.6893	48.4053	0.654404	0.26945	0.00960392	0.0168866	22.168	6.9755	17.1829	2.79183	Y	Y	2	magenta
UMAG_04471	KIS67369	hypothetical protein	132.67	82.8961	107.783	0.654275	0.177635	0.000152124	0.000361161	166.999	18.9756	132.012	13.2594	Y	Y	0	pink
UMAG_03994	KIS67945	probable PDC1 - pyruvate decarboxylase	259.326	162.654	210.99	0.653611	0.153743	1.4153e-05	3.98035e-05	99.2754	15.8151	78.9868	9.08343	Y	Y	1	dark-green
UMAG_10263	KIS70708	related to 1-phosphatidylinositol-4	36.1858	21.891	29.0384	0.653572	0.288525	0.0148702	0.0251633	13.7068	3.09412	10.5637	2.57207	N	Y	4	beige
UMAG_04623	KIS67524	probable RFC3 - DNA replication factor C	120.945	75.4613	98.203	0.653063	0.182362	0.000226356	0.00052392	79.2413	11.8779	62.9757	8.50357	Y	Y	0	yellow
UMAG_10198	KIS70121	probable PPG1 - phosphoprotein phosphatase PPG catalytic chain	60.0761	36.9709	48.5235	0.652474	0.239742	0.00421128	0.00794534	41.8773	3.77262	32.7475	9.56451	Y	Y	0	beige
UMAG_10057	KIS69587	probable G10 protein	68.5281	42.4782	55.5032	0.651992	0.213706	0.00149839	0.00306706	103.343	12.5596	81.029	11.6153	Y	Y	6	yellow
UMAG_04416	KIS67315	probable POB3 - protein that binds to DNA polymerase I	260.066	162.486	211.276	0.651794	0.182952	0.00024265	0.000559029	104.353	22.2647	82.5921	12.7209	Y	Y	0	yellow
UMAG_02755	KIS69424	hypothetical protein	308.797	185.718	247.257	0.651516	0.315315	0.0239866	0.0387868	69.9473	7.96036	53.3619	29.8104	Y	Y	4	magenta
UMAG_10576	KIS68496	related to prefoldin subunit 3 / related to SIW14 - Tyrosine phosphatase involved in actin filament organization	101.38	62.9205	82.1502	0.650957	0.216403	0.00171815	0.00348814	44.2559	8.9524	35.029	6.02633	N	Y	0	yellow
UMAG_10147	KIS69893	probable 60S ribosomal protein L12	529.061	333.042	431.051	0.650916	0.145635	5.24363e-06	1.57187e-05	713.891	20.4702	569.543	97.1572	Y	Y	0	yellow
UMAG_15027	KIS66052	related to exodeoxyribonuclease	61.8654	38.2284	50.0469	0.650742	0.231757	0.00324878	0.00624246	38.1575	6.58752	29.8907	5.38187	N	Y	0	yellow
UMAG_05002	KIS67134	related to 7alpha-cephem-methoxylase P8 chain	41.3362	25.4088	33.3725	0.650575	0.256218	0.00716524	0.0129584	28.8604	2.65005	22.6621	3.64703	Y	Y	12	magenta
UMAG_10334	KIS68977	probable 40S ribosomal protein S3	1444.21	907.326	1175.77	0.649247	0.163879	4.92344e-05	0.000127119	1274.39	141.516	1013.2	202.015	Y	Y	0	yellow
UMAG_11526	KIS68036	probable RPL11B - ribosomal protein L11	720.52	448.866	584.693	0.649143	0.206622	0.00110265	0.00230074	914.48	221.757	722.296	138.032	Y	Y	0	yellow
UMAG_10783	KIS70244	probable glyoxylase I	398.368	252.008	325.188	0.64831	0.127517	2.48942e-07	8.80221e-07	586.939	39.4898	469.954	17.6394	Y	Y	12	beige
UMAG_01004	KIS71093	hypothetical protein	35.4023	21.5523	28.4773	0.648233	0.290487	0.0162733	0.0273338	40.1573	8.92176	31.2641	6.07664	Y	Y	0	yellow
UMAG_01748	KIS70581	related to RVS167 - BAR adaptor protein	328.866	207.078	267.972	0.648197	0.156681	2.352e-05	6.41635e-05	174.644	6.12089	139.224	25.3867	Y	Y	0	burlywood
UMAG_05456	KIS66464	hypothetical protein	348.098	219.55	283.824	0.64754	0.148439	8.64107e-06	2.50208e-05	168.226	25.5372	134.279	11.9949	Y	Y	8	cyan
UMAG_10957	KIS71817	probable adenylyl-cyclase-associated protein CAP	529.514	335.548	432.531	0.647385	0.117805	2.63716e-08	1.0621e-07	231.597	13.002	186.071	10.093	Y	Y	0	yellow
UMAG_01814	KIS70650	related to OMA1 - Metalloendopeptidase of the mitochondrial inner membrane	142.997	89.8957	116.446	0.646057	0.180797	0.000234368	0.000541493	66.8859	6.63238	52.9736	7.34784	Y	Y	2	cyan
UMAG_00315	KIS71886	probable biotin synthase	399.332	252.744	326.038	0.645948	0.135764	1.32174e-06	4.34086e-06	204.511	17.3209	164.034	12.0794	Y	Y	0	burlywood
UMAG_05671	KIS66886	related to acetylornithine aminotransferase precursor	679.284	429.813	554.549	0.645401	0.141018	3.17412e-06	9.82974e-06	219.312	19.1566	175.048	15.0654	Y	Y	0	burlywood
UMAG_03412	KIS68313	hypothetical protein	117.049	72.079	94.5639	0.644082	0.265047	0.00969679	0.017036	142.325	20.5343	110.683	45.9291	Y	Y	0.5	dark-green
UMAG_03754	KIS68174	related to NTA1 - Amidase	27.2113	16.2898	21.7506	0.643986	0.342809	0.0373869	0.0580576	16.1007	5.34843	12.3591	3.14229	N	Y	0.5	light-cyan
UMAG_02201	KIS69669	hypothetical protein	111.137	69.6739	90.4055	0.643615	0.196504	0.000700966	0.00150841	78.1273	10.1696	62.0457	10.5248	Y	Y	0.5	dark-green
UMAG_06072	KIS65983	related to OTU1 û deubiquitylation enzyme	128.609	81.0034	104.806	0.643124	0.171086	0.000114366	0.000277642	75.2652	6.52861	60.2935	7.61124	Y	Y	0	yellow
UMAG_00867	KIS70942	probable RPS22A - ribosomal protein S15a.e.c10	307.466	193.419	250.442	0.642549	0.182781	0.000292577	0.000667861	525.115	57.3792	418.693	89.9431	Y	Y	0	yellow
UMAG_10765	KIS70201	related to Ribonuclease H	161.731	101.615	131.673	0.641587	0.190828	0.000516004	0.00113304	105.603	24.5247	84.1485	8.22709	Y	Y	4	cyan
UMAG_01284	KIS71384	probable SEC18 - vesicular-fusion protein	644.456	406.677	525.566	0.641523	0.168484	9.41211e-05	0.000232691	167.168	15.873	134.327	31.4959	Y	Y	2	magenta
UMAG_00117	KIS71676	related to amidase (acetamidase)	112.69	70.3891	91.5394	0.641438	0.214491	0.00184352	0.00371813	37.1023	4.14508	29.5927	8.27444	Y	Y	0.5	dark-green
UMAG_04661	KIS67566	hypothetical protein	93.7607	58.0414	75.901	0.640922	0.250655	0.00687135	0.0124653	63.9752	19.4733	49.9988	13.8208	Y	Y	0.5	dark-green
UMAG_00823	KIS72424	hypothetical protein	115.782	72.2424	94.0122	0.640911	0.223176	0.00268805	0.00525568	112.569	29.2691	89.3463	14.1922	Y	Y	0.5	beige
UMAG_11209	KIS66018	probable Guanine nucleotide-binding protein gamma subunit	94.1459	58.557	76.3515	0.639826	0.241971	0.00535119	0.00991359	257.042	69.2554	203.193	35.1726	Y	Y	0.5	red
UMAG_12194	KIS69309	related to SWD2 - subunit of the COMPASS complex	75.6764	47.0618	61.3691	0.639775	0.238065	0.00473119	0.00885128	44.5713	11.8264	35.421	3.886	Y	Y	0	burlywood
UMAG_10188	KIS70091	l-ornithine N5-oxygenase	315.335	199.785	257.56	0.639172	0.156159	2.86397e-05	7.68962e-05	108.871	16.3621	87.4539	12.2753	Y	Y	0.5	beige
UMAG_02405	KIS69889	related to KAR4 - transcription factor required for gene regulation in response to pheromones	210.582	131.72	171.151	0.637987	0.220013	0.00246879	0.00485787	74.9364	16.4804	59.5145	17.7076	Y	Y	1	magenta
UMAG_03542	KIS68454	hypothetical protein	85.7264	53.7446	69.7355	0.637892	0.217365	0.0022127	0.00439547	54.366	4.5656	43.0128	9.6135	Y	Y	0	yellow
UMAG_10825	KIS68707	related to 3-hydroxyacyl-CoA dehydrogenase	32.6033	19.5649	26.0841	0.637723	0.344125	0.0398318	0.0614553	26.886	10.5404	20.4588	5.45881	Y	Y	0	beige
UMAG_10348	KIS66518	hypothetical protein	121.635	75.6096	98.6226	0.637662	0.246439	0.00632195	0.0115563	107.79	25.3426	84.9666	26.0859	Y	Y	0.5	green
UMAG_02697	KIS69361	probable SRP54 - signal recognition particle subunit	491.347	313.653	402.5	0.637379	0.115741	2.49909e-08	1.00901e-07	172.371	3.46173	139.276	8.5056	Y	Y	0	yellow
UMAG_02177	KIS69643	related to DRAP deaminase RIB2	267.53	169.51	218.52	0.637349	0.161271	5.24973e-05	0.000134898	52.3103	4.99086	42.0824	7.37837	Y	Y	1	yellow
UMAG_01355	KIS71461	related to eIF3m -translation initiation factor 3 subunit M	737.235	469.352	603.293	0.637145	0.138333	2.80238e-06	8.75405e-06	373.453	26.2845	300.256	29.9828	Y	Y	0	yellow
UMAG_05702	KIS66918	related to oxidoreductase	143.232	90.8779	117.055	0.636742	0.163395	6.59785e-05	0.00016754	91.9612	5.80558	73.6574	5.17923	Y	Y	0.5	dark-green
UMAG_11275	KIS71160	related to D-lactate dehydrogenase (cytochrome)	156.524	98.6697	127.597	0.636686	0.187826	0.000470593	0.00104004	57.9055	9.09663	46.638	9.37176	Y	Y	0.5	dark-green
UMAG_12039	KIS70181	related to NADH-ubiquinone oxidoreductase 21.3 kDa subunit	364.847	232.715	298.781	0.636452	0.130515	7.38548e-07	2.49661e-06	406.828	29.199	327.659	16.1694	Y	Y	0	yellow
UMAG_04983	KIS67116	probable PCM1 - phosphoacetylglucosamine mutase	644.291	410.045	527.168	0.63549	0.14562	8.66104e-06	2.50673e-05	258.138	40.4211	207.873	20.9839	Y	Y	2	green
UMAG_01687	KIS70516	probable GTP-binding protein	145.535	91.8594	118.697	0.634448	0.189628	0.000550821	0.00120335	88.6724	14.8747	71.1297	11.6349	Y	Y	0	pink
UMAG_10376	KIS69108	hypothetical protein	69.0398	43.3596	56.1997	0.634268	0.218751	0.00249188	0.00490031	35.27	5.21707	28.2135	2.99236	Y	Y	0	beige
UMAG_01939	KIS70788	related to MRPL37 - mitochondrial ribosomal protein of the large subunit	83.9218	52.8808	68.4013	0.633668	0.211795	0.00184879	0.00372697	92.5508	11.0957	73.906	13.1538	Y	Y	0	yellow
UMAG_10262	KIS70706	hypothetical protein	60.0244	37.409	48.7167	0.633499	0.25139	0.00770969	0.0138577	153.026	38.3072	120.096	13.8884	Y	Y	4	light-green
UMAG_11734	KIS68222	probable NOP1 - fibrillarin	942.13	603.217	772.673	0.632632	0.121648	1.39334e-07	5.07385e-07	623.186	54.4366	503.882	23.8147	Y	Y	0	yellow
UMAG_11505	KIS68518	hypothetical protein	16.1707	9.57067	12.8707	0.632535	0.384884	0.0617043	0.0910068	18.9787	3.9435	14.2593	2.44944	N	Y	12	light-cyan
UMAG_03330	KIS68764	related to PAM17 - constituent of the TIM23 complex	120.888	76.5397	98.7137	0.632409	0.190457	0.000604841	0.00131117	115.932	17.1936	93.0332	8.92949	Y	Y	0	pink
UMAG_04681	KIS67584	hypothetical protein	89.0994	55.8926	72.496	0.631284	0.221411	0.0029156	0.0056663	29.7557	6.20584	23.7473	5.87648	N	Y	0	burlywood
UMAG_01504	KIS70332	probable Histone H2A	266.748	170.266	218.507	0.629388	0.154525	3.16967e-05	8.44373e-05	436.324	35.7788	352.817	55.6296	Y	Y	0	yellow
UMAG_05285	KIS66285	related to phosphoprotein phosphatase (serine/threonine specific protein phosphatase)	218.768	138.506	178.637	0.629058	0.199913	0.00111108	0.00231685	84.0025	10.5576	66.977	16.3857	Y	Y	0	yellow
UMAG_02034	KIS69495	hypothetical protein	47.4753	29.4961	38.4857	0.628504	0.273533	0.0141161	0.0240227	86.9135	27.7988	67.9673	7.57216	Y	Y	0	yellow
UMAG_11537	KIS67536	probable RPL15A 60S large subunit ribosomal protein L15.e	904.797	575.172	739.984	0.628375	0.180035	0.000325992	0.000737621	986.037	192.705	794.317	115.652	Y	Y	0	yellow
UMAG_10318	KIS68945	related to SLD5 - subunit of the GINS complex	100.136	63.7175	81.9267	0.62791	0.179003	0.000307856	0.000700017	63.9797	5.38678	51.157	2.53916	Y	Y	0	pink
UMAG_11661	KIS70286	probable Neutral trehalase	619.084	392.203	505.644	0.627784	0.200192	0.00115188	0.00239728	157.382	20.0916	125.225	31.4256	Y	Y	0	pink
UMAG_04244	KIS67746	related to MRP21 - mitochondrial ribosomal protein of the small subunit	170.952	108.902	139.927	0.627227	0.177089	0.000270251	0.000619305	187.479	25.3463	151.394	23.0603	Y	Y	0	pink
UMAG_04549	KIS67451	related to SKI6 - Exosome non-catalytic core component	118.315	75.384	96.8496	0.627225	0.179316	0.000318755	0.000722512	88.8194	6.66866	71.3918	6.273	Y	Y	0	pink
UMAG_03356	KIS68790	probable ENO1 - enolase I (2-phosphoglycerate dehydratase)	6785.1	4340.37	5562.73	0.62654	0.15092	2.2338e-05	6.11973e-05	3406.62	492.893	2749.99	242.369	Y	Y	0	yellow
UMAG_04659	KIS67564	probable glycerol kinase	309.302	198.139	253.72	0.626452	0.147811	1.54693e-05	4.32419e-05	135.497	14.6895	109.848	6.87236	Y	Y	0	burlywood
UMAG_00057	KIS71615	hypothetical protein	222.328	142.537	182.432	0.625693	0.144679	1.05157e-05	3.01514e-05	231.897	21.0475	187.632	9.32709	Y	Y	0	yellow
UMAG_01309	KIS71411	related to TIP41 - negatively regulates the TOR signaling pathway	99.8648	63.5134	81.6891	0.625293	0.191763	0.000755132	0.00161635	38.7585	3.53612	31.1176	4.31617	Y	Y	8	magenta
UMAG_02105	KIS69569	probable 3-hydroxybutyryl-CoA dehydrogenase	71.1091	45.0851	58.0971	0.625279	0.207606	0.00175612	0.00355739	50.4915	5.66417	40.7262	1.3232	Y	Y	0.5	dark-green
UMAG_10440	KIS68348	related to HEM15 - ferrochelatase precursor	323.176	207.385	265.28	0.625146	0.142505	7.85164e-06	2.29198e-05	173	13.1536	140.306	7.58085	Y	Y	0	yellow
UMAG_02924	KIS68939	probable ribosomal protein L13B	1018.08	653.132	835.605	0.624789	0.141589	7.03414e-06	2.07019e-05	1086.65	84.5221	883.398	146.445	Y	Y	0	yellow
UMAG_04156	KIS67652	probable LEU4 - 2-isopropylmalalate synthase	1077.88	690.978	884.427	0.623284	0.154124	3.59949e-05	9.47928e-05	375.912	34.0324	304.264	45.8812	Y	Y	2	light-green
UMAG_01954	KIS70803	hypothetical protein	151.72	97.0974	124.408	0.622968	0.163721	9.764e-05	0.000240471	101.709	3.55687	82.596	10.9771	Y	Y	0	yellow
UMAG_01431	KIS71538	related to ATP-binding cassette transporter protein	234.932	148.773	191.853	0.621788	0.219288	0.00307968	0.00595293	39.4296	9.88435	31.5961	8.08257	N	Y	0	burlywood
UMAG_00118	KIS71677	probable UDP-glucose 6-dehydrogenase	701.73	451.497	576.613	0.621787	0.139211	5.49694e-06	1.64399e-05	313.37	32.9617	254.455	23.3849	Y	Y	0	burlywood
UMAG_04512	KIS67413	related to DnaJ protein	42.3661	26.3632	34.3647	0.621556	0.270551	0.0143406	0.0243278	27.1372	4.46778	21.7031	7.12048	Y	Y	0	yellow
UMAG_01550	KIS70380	related to DRE2 - component of the Fe-S protein assembly machinery	219.736	141.165	180.45	0.621077	0.155602	4.52354e-05	0.000117594	142.286	7.11254	115.636	15.0266	Y	Y	0.5	light-cyan
UMAG_04067	KIS68026	related to MAK11 protein (maintenance of killer toxin-encoding satellite M1 dsRNA)	182.309	116.061	149.185	0.6209	0.200555	0.00133218	0.00275212	66.1279	6.47038	53.0185	13.8045	Y	Y	0	burlywood
UMAG_05139	KIS70064	probable 40S ribosomal protein S2	837.295	537.808	687.551	0.620395	0.154071	3.90571e-05	0.00010244	724.363	63.1459	589.042	106.153	Y	Y	0	yellow
UMAG_01986	KIS70838	probable sterol carrier protein	41.593	25.92	33.7565	0.619829	0.284192	0.019186	0.0316824	20.7184	4.76467	16.3846	4.83999	Y	Y	0.5	dark-green
UMAG_11032	KIS66143	hypothetical protein	2.05674	0.464357	1.26055	0.619684	0.922961	0.151716	0.201663	2.62048	2.2243	0.925153	1.1249	Y	Y	0	#N/A
UMAG_05019	KIS67152	probable SAM2 - S-adenosylmethionine synthetase 2	365.009	235.596	300.302	0.619427	0.127439	8.15637e-07	2.74571e-06	209.64	12.6992	171.383	10.7454	Y	Y	2	yellow
UMAG_01837	KIS70677	hypothetical protein	167.437	106.679	137.058	0.619392	0.19469	0.00100447	0.00211227	66.6628	10.0363	53.9942	13.5913	Y	Y	0	beige
UMAG_02440	KIS69926	probable RPL40A - Ubiquitin	608.632	391.596	500.114	0.619319	0.148578	2.12359e-05	5.84507e-05	1056.06	109.33	861.335	118.433	Y	Y	0	yellow
UMAG_11026	KIS66131	related to phospholipase A2	123.494	78.507	101	0.618943	0.20786	0.00197748	0.00395864	27.9475	6.95658	22.5158	4.12961	N	Y	6	cyan
UMAG_11207	KIS66016	related to PNP1 - purine-nucleoside phosphorylase	383.65	247.251	315.45	0.617815	0.145466	1.49921e-05	4.20169e-05	265.738	31.408	216.524	22.4909	Y	Y	8	beige
UMAG_01893	KIS70738	related to putative S-adenosylmethionine-dependent methyltransferase of the seven beta-strand family	172.71	111.028	141.869	0.617739	0.160754	8.43259e-05	0.000211224	77.9123	8.18144	63.7237	4.82986	Y	Y	0	yellow
UMAG_05299	KIS66299	hypothetical protein	2.05583	0.472517	1.26417	0.617258	0.920855	0.15169	0.201663	1.88526	1.69262	0.616727	0.73915	N	N	4	cyan
UMAG_02652	KIS69311	hypothetical protein	160.711	103.222	131.966	0.616328	0.17202	0.000234745	0.000542171	188.549	6.83879	153.284	28.8613	Y	Y	0.5	red
UMAG_11280	KIS71189	hypothetical protein	357.9	230.876	294.388	0.615266	0.148292	2.32676e-05	6.35017e-05	150.518	11.3596	123.324	21.0962	Y	Y	2	magenta
UMAG_05505	KIS66512	related to mediator complex subunit soh1	41.3319	26.0802	33.7061	0.614279	0.25261	0.0101288	0.0177035	60.3984	3.91718	47.9152	7.22332	Y	Y	4	cyan
UMAG_01228	KIS71328	related to eIF3l - translation initiation factor 3 subunit L	984.708	633.234	808.971	0.613971	0.173471	0.00027626	0.000631955	329.739	14.1174	266.931	58.394	Y	Y	0	yellow
UMAG_00403	KIS71977	probable MDH1 - malate dehydrogenase precursor	1450.68	939.274	1194.98	0.612752	0.132247	2.42122e-06	7.64096e-06	943.013	144.023	771.797	9.37453	Y	Y	0	yellow
UMAG_10238	KIS71426	probable 60S ribosomal protein L18	599.148	385.303	492.225	0.612544	0.178423	0.000411845	0.00091837	694.978	40.1628	565.187	135.499	Y	Y	0	yellow
UMAG_10673	KIS66648	hypothetical protein	178.161	114.251	146.206	0.612279	0.18954	0.000853391	0.00181226	97.1075	13.0647	78.9679	17.5612	Y	Y	0	burlywood
UMAG_01427	KIS71533	related to Crg1 protein (Putative arabinase)	2.05224	0.482924	1.26758	0.612158	0.917229	0.153616	0.204078	1.74173	1.58159	0.791537	0.389696	N	N	12	#N/A
UMAG_12260	KIS67235	hypothetical protein	150.937	96.8427	123.89	0.612097	0.183594	0.000594129	0.00129054	57.5911	6.34102	47.1146	11.5827	Y	Y	0.5	dark-green
UMAG_00862	KIS70937	probable RPL14B - ribosomal protein	406.225	261.189	333.707	0.611997	0.179885	0.000461977	0.00102274	668.098	112.09	546.211	105.675	Y	Y	0	yellow
UMAG_11369	KIS70574	related to RIT1 - initiator tRNA phosphoribosyl-transferase	46.4817	29.1109	37.7963	0.611966	0.279247	0.0189267	0.0313344	19.4069	5.02964	15.3901	4.54706	N	Y	8	light-cyan
UMAG_00053	KIS71611	probable 3-dehydroquinate dehydratase	21.8324	13.405	17.6187	0.6116	0.337557	0.0453689	0.0690257	30.7838	7.17842	23.759	3.22464	Y	Y	0.5	burlywood
UMAG_03784	KIS68205	related to STRIATIN	1722.49	1104.74	1413.61	0.610476	0.198381	0.00143578	0.002952	425.549	43.9984	345.917	106.729	Y	Y	2	yellow
UMAG_15073	KIS70455	hypothetical protein	147.843	95.3298	121.586	0.610363	0.174351	0.000322423	0.000730058	76.9438	10.9218	62.6287	5.38074	N	Y	0	beige
UMAG_01096	KIS71187	related to TOM22 - mitochondrial outer membrane import receptor complex subunit	287.538	186.885	237.211	0.609504	0.129034	1.63075e-06	5.28581e-06	358.178	17.5033	294.324	10.8913	Y	Y	0	yellow
UMAG_11308	KIS71457	histone deacetylase	259.488	167.105	213.296	0.609446	0.179079	0.000463031	0.00102473	99.1029	11.5003	81.4942	18.7772	Y	Y	0.5	beige
UMAG_05450	KIS66458	related to Long-chain-fatty-acid--CoA ligase 6	393.139	254.327	323.733	0.60936	0.160773	0.000104961	0.000256935	126.707	14.1625	103.355	16.0375	Y	Y	0.5	dark-green
UMAG_10101	KIS71902	hypothetical protein	78.3072	50.0697	64.1885	0.609151	0.209845	0.00255138	0.00501122	28.8371	4.30458	23.3781	4.20654	N	Y	4	green
UMAG_11342	KIS71913	related to xap-5 protein	51.6198	32.6782	42.149	0.608996	0.249491	0.00994005	0.0174207	32.9716	6.55853	26.5232	5.99918	Y	Y	0	yellow
UMAG_11451	KIS72227	related to COP9 signalosome complex subunit 6	300.095	195.257	247.676	0.608406	0.126756	1.12097e-06	3.70787e-06	189.421	6.92296	156.2	6.10249	Y	Y	0	salmon
UMAG_05410	KIS66419	related to RTF1 - subunit of the RNA polymerase II-associated Paf1 complex	334.767	216.122	275.444	0.608369	0.173343	0.000311973	0.000708132	125.388	23.9676	102.487	15.5438	Y	Y	0	beige
UMAG_10073	KIS69679	related to lincomycin-condensing protein lmbA	657.555	425.557	541.556	0.608223	0.161198	0.000112421	0.000273229	248.483	33.7818	203.475	32.5076	Y	Y	0	burlywood
UMAG_00966	KIS71051	related to RAD26 - DNA repair and recombination protein	169.972	107.055	138.513	0.60822	0.272525	0.0171016	0.0285986	33.8775	2.54755	27.1146	13.0996	N	Y	0.5	dark-green
UMAG_06235	KIS65859	probable CCT2 - chaperonin of the TCP1 ring complex	1732.58	1122.37	1427.48	0.608217	0.141837	1.15244e-05	3.28686e-05	739.9	70.5646	603.703	63.0257	Y	Y	0	yellow
UMAG_04116	KIS67614	hypothetical protein	248.995	161.559	205.277	0.607901	0.146357	2.3009e-05	6.29024e-05	152.106	14.4218	125.141	13.7633	Y	Y	0	pink
UMAG_01328	KIS71429	probable IDH2 - isocitrate dehydrogenase (NAD) subunit 2	1110.5	724.185	917.344	0.60676	0.11721	1.59753e-07	5.75565e-07	642.825	33.0397	530.117	35.6245	Y	Y	0	yellow
UMAG_00908	KIS70990	hypothetical protein	62.8712	40.1105	51.4908	0.606651	0.229436	0.00562518	0.0103766	59.9685	8.38792	48.5374	9.8697	Y	Y	0.5	burlywood
UMAG_11556	KIS67105	probable enoyl-CoA hydratase precursor	139.088	90.0321	114.56	0.605769	0.175484	0.000387933	0.000867444	104.83	11.091	85.7568	6.48779	Y	Y	0	beige
UMAG_06067	KIS65978	probable CCT3 - chaperonin of the TCP1 ring complex	1200.33	777.633	988.983	0.605518	0.166094	0.000186212	0.000434292	475.587	65.7089	387.842	62.5002	Y	Y	2	yellow
UMAG_01795	KIS70630	hypothetical protein	93.1773	59.969	76.5731	0.605465	0.196391	0.00142518	0.00293207	63.0273	9.30425	51.4444	5.64394	Y	Y	0	yellow
UMAG_00595	KIS72177	probable aspartate aminotransferase	1013.52	660.375	836.948	0.605051	0.131889	3.1644e-06	9.80433e-06	524.44	60.9549	432.278	26.2711	Y	Y	2	yellow
UMAG_11068	KIS68302	related to Copper amine oxidase 1	97.029	62.2706	79.6498	0.604997	0.214233	0.00326826	0.00627614	30.9054	1.69211	25.2068	6.8843	Y	Y	0.5	red
UMAG_11522	KIS67902	hypothetical protein	96.5113	62.0646	79.288	0.604533	0.201921	0.00191317	0.00384061	73.546	13.4462	60.3039	8.12526	Y	Y	2	yellow
UMAG_03835	KIS68253	hypothetical protein	153.482	98.4715	125.977	0.603586	0.221454	0.00440697	0.00827829	82.9593	10.2009	67.3961	19.9144	Y	Y	8	beige
UMAG_11248	KIS70919	hypothetical protein	78.29	50.3212	64.3056	0.602998	0.206745	0.00246149	0.00484498	35.2826	4.03403	28.8224	5.48216	Y	Y	0.5	light-cyan
UMAG_10613	KIS70982	related to HYM1 - component of the RAM signaling network	518.7	338.271	428.485	0.602832	0.135611	6.23845e-06	1.85545e-05	290.046	38.769	239.786	20.2728	Y	Y	8	magenta
UMAG_04224	KIS67726	related to Myosin-like protein NUF2	81.6542	52.517	67.0856	0.6023	0.207592	0.00258291	0.00507161	39.0953	6.41845	31.8226	5.69123	Y	Y	0	yellow
UMAG_10643	KIS68641	related to dihydroorotate dehydrogenase	511.646	334.176	422.911	0.602267	0.129748	2.44773e-06	7.71333e-06	169.087	7.44075	139.67	13.9689	Y	Y	0	yellow
UMAG_04646	KIS67550	hypothetical protein	38.5184	24.1313	31.3248	0.602245	0.300874	0.0301917	0.0478153	26.2105	8.90853	20.6645	5.60398	N	Y	2	cyan
UMAG_10436	KIS67808	hypothetical protein	113.471	73.5395	93.5051	0.602138	0.178435	0.000518096	0.00113724	52.3308	1.38247	42.7513	5.84583	Y	Y	0	pink
UMAG_00091	KIS71650	hypothetical protein	57.2337	36.7198	46.9768	0.601983	0.229211	0.0059402	0.0109047	28.1095	3.32609	22.6482	3.31295	N	Y	6	cyan
UMAG_01664	KIS70491	probable MET22 - protein ser/thr phosphatase	254.442	165.803	210.123	0.601717	0.145596	2.53552e-05	6.87612e-05	149.285	12.0383	123.003	15.4725	Y	Y	2	yellow
UMAG_02938	KIS68957	hypothetical protein	168.965	109.346	139.155	0.601705	0.179101	0.000548346	0.00119835	35.8119	3.94854	29.5104	6.6458	N	Y	2	red
UMAG_04793	KIS66729	related to SVF1 - protein with a potential role in cell survival pathways	2179.17	1417.83	1798.5	0.601616	0.156732	8.7026e-05	0.000217061	1089.94	163.084	894.288	100.964	Y	Y	0.5	dark-green
UMAG_10239	KIS71427	related to Transformer-2 protein	276.766	180.145	228.456	0.601592	0.157023	8.97917e-05	0.000223098	182.367	28.6554	150.145	8.20112	Y	Y	0	pink
UMAG_10993	KIS65654	hypothetical protein	83.6745	54.1201	68.8973	0.601256	0.191601	0.00118946	0.00246912	89.6387	6.77566	73.407	3.97144	Y	Y	0	yellow
UMAG_04984	KIS67117	hypothetical protein	75.9896	49.0052	62.4974	0.600666	0.203468	0.00220128	0.00437547	27.5178	2.72247	22.4304	3.26651	N	N	4	magenta
UMAG_01292	KIS71393	hypothetical protein	142.178	92.277	117.228	0.599953	0.180032	0.000604635	0.00131116	118.281	9.86477	97.4024	16.48	Y	Y	0	burlywood
UMAG_10652	KIS68677	related to DCD1 - deoxycytidylate deaminase	73.4414	47.3802	60.4108	0.599818	0.205901	0.00249411	0.00490321	43.6527	5.00052	35.6897	4.92101	Y	Y	4	cyan
UMAG_11729	KIS69407	hypothetical protein	377.677	244.334	311.005	0.598964	0.195166	0.00149814	0.00306706	226.197	31.937	186	49.6537	Y	Y	4	magenta
UMAG_02864	KIS68877	related to Acetylcholinesterase precursor	135.511	87.7658	111.639	0.598714	0.19137	0.00123093	0.00254865	40.0979	8.42698	32.8965	4.00822	N	Y	12	cyan
UMAG_01735	KIS70567	GTP-binding protein	267.534	174.659	221.097	0.59864	0.14761	3.54694e-05	9.35234e-05	243.134	28.1919	200.87	22.5074	Y	Y	1	red
UMAG_11485	KIS68871	related to SNARE protein of Golgi compartment	119.563	77.3384	98.4506	0.598572	0.199783	0.00190863	0.00383387	108.248	18.1545	89.0657	13.2337	Y	Y	8	salmon
UMAG_02304	KIS69782	hypothetical protein	135.834	86.9996	111.417	0.597992	0.23705	0.00797655	0.0143016	19.9432	4.3275	16.2378	5.05108	N	N	2	yellow
UMAG_00169	KIS71731	related to AUT1 - essential for autophagocytosis	1024.47	665.409	844.939	0.597736	0.180942	0.000670175	0.00144649	520.216	117.942	429.602	55.9072	Y	Y	0.5	magenta
UMAG_11103	KIS68265	probable RPL3 - 60s ribosomal protein l3	2351.71	1528.03	1939.87	0.596386	0.183055	0.000784237	0.00167256	1345.05	144.893	1104.6	280.596	Y	Y	0	yellow
UMAG_11388	KIS70868	related to YFH7 - putative kinase	59.8016	38.4629	49.1322	0.596268	0.227177	0.00602398	0.0110554	59.4337	3.44162	48.516	9.94345	Y	Y	0	burlywood
UMAG_03080	KIS69102	probable serine/threonine protein phosphatase PP1	604.617	397.07	500.843	0.596052	0.11987	4.73199e-07	1.62772e-06	408.455	43.2207	339.311	13.3749	Y	Y	0	pink
UMAG_10337	KIS68990	probable ubiquitin-conjugating enzyme e2-23 kda	342.518	224.671	283.594	0.595609	0.131927	4.52922e-06	1.36787e-05	410.642	36.8412	341.138	28.6715	Y	Y	4	light-cyan
UMAG_11223	KIS65817	hypothetical protein	88.0243	57.082	72.5532	0.595469	0.193597	0.00147855	0.00303316	120.837	11.7985	99.5681	13.6006	Y	Y	0	yellow
UMAG_05910	KIS66171	related to GRD19 protein	194.034	126.705	160.37	0.593799	0.168676	0.000305361	0.000695568	109.924	12.3641	90.9076	12.0061	Y	Y	0	burlywood
UMAG_10532	KIS67348	related to polyketide synthase required for biosynthesis of fumonisin mycotoxins	143.265	93.1056	118.185	0.593694	0.192868	0.00146623	0.00301008	68.2013	5.5103	56.1288	13.6161	Y	Y	4	cyan
UMAG_10970	KIS65862	related to Sno-type pyridoxine vitamin B6 biosynthetic protein SNO1	354.283	232.527	293.405	0.593683	0.139601	1.50404e-05	4.21341e-05	214.796	13.6706	177.871	19.277	Y	Y	0	yellow
UMAG_00855	KIS70930	probable proline-tRNA ligase	1213.2	798.63	1005.92	0.593559	0.115287	1.8826e-07	6.72654e-07	369.989	27.9147	307.7	10.8515	Y	Y	2	yellow
UMAG_10509	KIS68252	related to DNA repair protein Rad62	140.446	91.8591	116.152	0.592676	0.161546	0.000173703	0.000408638	86.0003	7.23729	71.3831	6.0944	Y	Y	4	cyan
UMAG_00495	KIS72074	hypothetical protein	69.3038	44.9834	57.1436	0.592006	0.204111	0.00262376	0.00513932	87.0759	2.59368	72.0273	8.35939	Y	Y	4	light-green
UMAG_11170	KIS72310	probable NADH2 dehydrogenase (ubiquinone) flavoprotein 1	2400.35	1579.09	1989.72	0.591747	0.128673	3.03424e-06	9.42818e-06	1055.96	68.6048	878.987	97.2172	Y	Y	0	pink
UMAG_01040	KIS71130	probable 4-aminobutyrate aminotransferase	456.019	300.107	378.063	0.591359	0.12679	2.22766e-06	7.06119e-06	225.843	22.7893	188.5	17.363	Y	Y	0.5	dark-green
UMAG_02398	KIS69882	related to squalene monooxygenase	354.492	231.88	293.186	0.591292	0.167446	0.000293552	0.000669851	136.628	14.3195	113.6	22.0841	Y	Y	0	yellow
UMAG_12082	KIS71688	related to Serine protease	40.2958	25.8939	33.0949	0.590465	0.253104	0.0135885	0.0232142	28.918	2.42938	23.373	1.52617	Y	Y	0.5	burlywood
UMAG_04650	KIS67554	hypothetical protein	139.1	90.5544	114.827	0.590429	0.193673	0.00162442	0.00331137	49.1167	6.00974	40.5417	9.06749	N	Y	0.5	light-cyan
UMAG_02004	KIS70859	hypothetical protein	72.433	46.3975	59.4152	0.590342	0.254374	0.0140164	0.0238719	53.1644	12.5801	43.3037	14.113	Y	Y	8	cyan
UMAG_01791	KIS70626	hypothetical protein	137.598	89.161	113.38	0.590172	0.213463	0.00399518	0.0075708	27.4243	6.92375	22.6144	4.62959	N	Y	0.5	burlywood
UMAG_05754	KIS66972	probable electron transfer flavoprotein alpha chain precursor	624.383	412.118	518.25	0.589593	0.116847	3.24316e-07	1.13493e-06	398.641	26.5067	332.752	9.22369	Y	Y	0	beige
UMAG_12130	KIS71380	probable Small nuclear ribonucleoprotein F	16.4323	10.0373	13.2348	0.589336	0.38454	0.0811743	0.116349	44.4498	7.57071	34.3629	12.2663	Y	Y	0	yellow
UMAG_10257	KIS70679	related to inner mitochondrial membrane peptidase 2	273.105	179.08	226.093	0.588753	0.167273	0.000307416	0.000699264	154.306	4.7717	128.213	24.3994	Y	Y	0	yellow
UMAG_00476	KIS72054	related to 2-hydroxy-6-oxo-6-phenylhexa-2	69.8068	45.3697	57.5883	0.588684	0.204892	0.00287436	0.00559287	47.5812	3.25138	39.3495	5.02457	Y	Y	0.5	dark-green
UMAG_00184	KIS71749	related to RPF1 - involved in the assembly of the large ribosomal subunit	141.649	92.2405	116.945	0.588603	0.207408	0.00318481	0.00613229	70.1529	9.53824	57.286	11.9836	Y	Y	4	light-green
UMAG_02070	KIS69531	hypothetical protein	191.234	124.94	158.087	0.588319	0.183372	0.000948268	0.00200386	130.043	18.1395	107.795	21.0089	Y	Y	8	beige
UMAG_04234	KIS67736	related to histone deacetylase	61.902	39.8195	50.8607	0.58754	0.247561	0.0122397	0.0211075	24.4398	6.70337	19.8662	4.20775	N	Y	6	cyan
UMAG_11665	KIS70309	related to XPA binding protein	148.873	97.5164	123.195	0.587215	0.174154	0.000533167	0.00116755	76.8054	8.49487	64.2096	9.84416	Y	Y	0	yellow
UMAG_05278	KIS66278	hypothetical protein	92.3409	59.43	75.8854	0.587095	0.256045	0.0149699	0.025309	91.6522	26.0493	74.2724	16.9728	Y	Y	0	pink
UMAG_11336	KIS71525	hypothetical protein	272.572	178.499	225.536	0.586724	0.181726	0.000879968	0.00186686	198.232	37.2512	163.986	18.6753	Y	Y	0.5	light-cyan
UMAG_02526	KIS69175	related to POP5 - subunit of both RNase MRP and nuclear RNase P	61.0659	39.5037	50.2848	0.586546	0.235957	0.00902293	0.0159515	49.454	11.3085	40.6645	3.34627	N	Y	12	light-cyan
UMAG_00579	KIS72161	related to n-terminal acetyltransferase 1	425.856	280.624	353.24	0.585956	0.142493	2.82649e-05	7.60165e-05	106.692	11.9515	89.339	13.0918	Y	Y	0	yellow
UMAG_11104	KIS68267	putative nitrite reductase	1619.43	1051.82	1335.62	0.585873	0.219086	0.00521914	0.00968283	316.469	15.8985	260.26	97.4373	Y	Y	0.5	red
UMAG_01701	KIS70531	hypothetical protein	93.4258	61.0693	77.2476	0.585738	0.19372	0.00177362	0.00358948	44.0198	6.74716	36.6035	1.89854	Y	Y	0.5	beige
UMAG_15013	KIS67450	related to COP9 signalosome complex subunit 1	334.201	220.279	277.24	0.584953	0.146231	4.54664e-05	0.000118004	144.081	9.83192	120.779	18.6852	Y	Y	4	cyan
UMAG_10682	KIS66683	probable CYB2 - L-lactate dehydrogenase (cytochrome b2)	244.914	161.667	203.291	0.584334	0.145942	4.48523e-05	0.000116692	109.651	3.49922	91.4943	11.1592	Y	Y	1	dark-green
UMAG_04956	KIS67087	protein kinase Ukc1p	1213.51	799.77	1006.64	0.583878	0.153709	0.000104832	0.000256716	390.496	50.0384	326.877	59.4585	Y	Y	2	light-green
UMAG_00233	KIS71801	hypothetical protein	252.904	167.079	209.991	0.583102	0.138277	1.7803e-05	4.94442e-05	101.411	7.68238	84.9074	9.73552	Y	Y	2	burlywood
UMAG_05126	KIS70052	related to NCL1 - tRNA (cytosine-5-)-methyltransferase / probable Orotate phosphoribosyl transferase	652.935	430.143	541.539	0.582736	0.162474	0.000240112	0.000553973	126.507	10.2536	105.077	19.5866	N	Y	0	yellow
UMAG_02249	KIS69725	probable vacuolar protein sorting protein VpsB	172.544	113.105	142.824	0.5825	0.182931	0.0010394	0.00217863	57.8257	7.82007	48.2534	10.8486	Y	Y	0	pink
UMAG_05060	KIS67194	related to 60S ribosomal protein L12	112.41	73.6323	93.0209	0.582431	0.196749	0.00218032	0.00433781	136.018	20.8947	112.458	15.1795	Y	Y	0	yellow
UMAG_02512	KIS69161	probable 6-phosphofructokinase	302.47	200.433	251.452	0.581416	0.132197	7.90872e-06	2.3076e-05	78.1098	6.58897	65.4995	1.08197	Y	Y	4	light-green
UMAG_01180	KIS71280	probable protein kinase CK2 alpha subunit	362.752	239.597	301.174	0.580542	0.154338	0.000121943	0.000293828	236.759	29.5785	198.425	28.8598	Y	Y	0	yellow
UMAG_04979	KIS67112	related to PDR16 - protein involved in lipid biosynthesis and multidrug resistance / PHO13 - 4-nitrophenylphosphatase	342.744	227.003	284.873	0.580346	0.137239	1.70623e-05	4.74689e-05	110.021	11.3708	92.4307	8.94102	Y	Y	0	yellow
UMAG_11695	KIS70427	related to 2-epi-5-epi-valiolone synthase	764.916	386.924	575.92	0.580177	0.629321	0.183319	0.237417	369.46	249.996	234.857	206.254	Y	Y	0.5	light-cyan
UMAG_12282	KIS66775	related to eIF3k -translation initiation factor 3 subunit K	313.222	207.635	260.429	0.57937	0.137645	1.85941e-05	5.14864e-05	246.996	20.591	207.303	15.5849	Y	Y	0	yellow
UMAG_02626	KIS69283	hypothetical protein	10.5335	5.90609	8.21979	0.579088	0.52325	0.158711	0.209711	2.73437	1.40631	1.91277	1.28128	N	N	4	magenta
UMAG_03486	KIS68392	related to nucleotide binding protein (NBP 2)	195.9	129.582	162.741	0.578626	0.155902	0.000149033	0.000354474	121.307	15.4295	101.673	4.12506	Y	Y	12	green
UMAG_00308	KIS71880	related to APN1 - AP endonuclease	58.5054	38.0652	48.2853	0.577494	0.238933	0.0110244	0.0191291	23.7196	4.01027	19.5433	3.66982	N	Y	0	pink
UMAG_10755	KIS66495	hypothetical protein	234.914	154.846	194.88	0.577493	0.182042	0.00108412	0.00226575	407.347	82.4853	339.77	25.3129	Y	Y	12	beige
UMAG_11231	KIS65838	probable bifunctional protein (related to glutathione S-transferase/ probable histidinol dehydrogenase)	251.579	165.907	208.743	0.577248	0.17345	0.000631046	0.00136477	109.128	14.6995	91.6295	18.8809	Y	Y	0	burlywood
UMAG_00002	KIS71556	related to AFG1 - ATPase family gene	159.922	105.542	132.732	0.577173	0.17029	0.000506486	0.00111383	65.1897	8.54722	54.454	7.85731	Y	Y	0	yellow
UMAG_03892	KIS67834	probable ATP dependent RNA helicase of the DEAD-box family	224.089	146.84	185.465	0.576665	0.211139	0.00448274	0.00841328	73.022	11.3023	60.4072	16.1376	Y	Y	2	green-yellow
UMAG_00386	KIS71961	hypothetical protein	608.694	404.185	506.439	0.576346	0.140954	3.15056e-05	8.39975e-05	243.431	23.0056	204.698	23.8464	Y	Y	0.5	dark-green
UMAG_03292	KIS68725	related to Protein mlo2	192.571	126.114	159.343	0.575929	0.213731	0.00500854	0.00934311	71.0685	20.0393	58.9926	12.1085	Y	Y	8	cyan
UMAG_05282	KIS66282	related to VPS60 involved in vacuolar protein sorting	211.231	140.298	175.764	0.575871	0.141697	3.51463e-05	9.27471e-05	214.161	13.7922	180.093	5.83575	Y	Y	0	pink
UMAG_04196	KIS67695	hypothetical protein	311.534	206.732	259.133	0.575086	0.151507	0.000106935	0.000260777	142.178	18.4288	119.71	8.93878	Y	Y	8	magenta
UMAG_06233	KIS65857	probable SIK1 - involved in pre-rRNA processing	525.924	346.67	436.297	0.574098	0.191972	0.00199725	0.00399697	224.986	32.857	187.075	44.8141	Y	Y	0	yellow
UMAG_05677	KIS66892	related to citrate lyase beta subunit	347.871	231.216	289.543	0.573265	0.149177	8.85486e-05	0.000220518	187.343	24.3629	157.805	15.9964	Y	Y	0.5	beige
UMAG_11960	KIS68506	hypothetical protein	723.319	475.798	599.558	0.572113	0.207632	0.00418595	0.00790911	284.697	26.783	237.964	75.2501	Y	Y	0.5	burlywood
UMAG_10662	KIS68189	probable SSU72 - Nuclear zinc-finger motif containing protein	53.9072	35.2332	44.5702	0.571821	0.238591	0.0117277	0.0202678	50.6341	9.85143	42.2291	2.13346	Y	Y	0.5	salmon
UMAG_05662	KIS66876	probable mitochondrial porin	1524.55	1018.41	1271.48	0.571368	0.121921	2.04047e-06	6.50293e-06	1146.2	116.046	967.939	36.3143	Y	Y	0	yellow
UMAG_10123	KIS72063	S6K1-type AGC kinase	882.085	589.12	735.603	0.571029	0.123878	2.96556e-06	9.22973e-06	342.62	40.678	289.727	26.3987	Y	Y	1	red
UMAG_00666	KIS72254	hypothetical protein	176.598	117.326	146.962	0.57091	0.162139	0.000313037	0.000710299	94.1829	9.70106	79.2508	9.5893	Y	Y	0	yellow
UMAG_10351	KIS66530	related to Co-chaperone protein HscB	207.402	137.733	172.567	0.570612	0.166179	0.000432835	0.00096285	158.538	15.5326	133.275	18.7158	Y	Y	0	yellow
UMAG_03417	KIS68318	putative acetamidase	166.578	110.486	138.532	0.570242	0.172324	0.000680275	0.00146681	57.0687	3.88243	48.2591	8.95911	Y	Y	0.5	blue
UMAG_05766	KIS66983	probable YHM2 - Protein of the mitochondrial carrier family (MCF)	619.02	412.356	515.688	0.569922	0.14858	9.13085e-05	0.000226518	465.175	61.3146	392.838	50.7944	Y	Y	0	yellow
UMAG_11769	KIS67072	probable SUB2 - mRNA export protein	621.289	416.294	518.791	0.566359	0.124932	4.28302e-06	1.30081e-05	319.492	34.9223	271.131	21.3402	Y	Y	0	yellow
UMAG_03595	KIS68508	hypothetical protein	129.894	86.6137	108.254	0.566191	0.159627	0.000287384	0.00065647	76.3509	3.25093	64.4949	4.03714	Y	Y	0.5	burlywood
UMAG_05029	KIS67162	related to macronuclear actin 1	164.554	109.616	137.085	0.565864	0.162508	0.000365052	0.000820071	67.6525	5.68051	57.3444	8.78817	Y	Y	0	yellow
UMAG_05207	KIS70135	related to DPB3 - third-largest subunit of DNA polymerase II	40.7915	25.6753	33.2334	0.564771	0.362846	0.0801173	0.114987	36.3949	16.5377	28.9932	11.3581	Y	Y	0	pink
UMAG_04268	KIS67775	probable saccharopine dehydrogenase (NAD	737.667	492.833	615.25	0.564692	0.153103	0.000164877	0.000389292	421.947	73.509	357.468	9.8917	Y	Y	0	burlywood
UMAG_04047	KIS68006	probable MAD2 - spindle-assembly checkpoint protein	52.6218	34.6731	43.6475	0.564484	0.22293	0.00816723	0.014611	53.9586	2.58094	45.1916	3.32663	Y	Y	6	salmon
UMAG_04406	KIS67307	probable DPH5 - diphthamide methyltransferase	156.602	103.929	130.265	0.563833	0.194629	0.00273147	0.00533252	105.551	23.0366	88.8391	8.53468	Y	Y	0	yellow
UMAG_01549	KIS70379	related to mitochondrial inheritance component mdm12	125.005	82.9255	103.965	0.563506	0.199334	0.00340444	0.00651635	60.5906	12.7038	50.6951	3.54866	Y	Y	0.5	magenta
UMAG_04744	KIS66681	hypothetical protein	57.7766	38.0283	47.9025	0.561298	0.236638	0.0126986	0.0218347	36.0617	7.25972	30.2349	4.88644	Y	Y	0	pink
UMAG_05214	KIS70142	probable DEAD box protein (putative RNA helicase)	287.784	192.112	239.948	0.560893	0.179129	0.00126996	0.00262609	114.78	12.8361	96.3846	16.8939	Y	Y	2	green
UMAG_02979	KIS69000	related to HPM1 - AdoMet-dependent methyltransferase	95.4751	63.6625	79.5688	0.560677	0.182091	0.00152125	0.00311089	51.9832	3.53793	43.9131	3.47717	Y	Y	4	cyan
UMAG_01847	KIS70689	hypothetical protein	12.8305	7.82809	10.3293	0.56066	0.421112	0.119927	0.165293	12.0337	2.55936	9.16711	3.60318	N	N	8	light-cyan
UMAG_11946	KIS69119	probable UDP-galactopyranose mutase	880.916	592.363	736.64	0.560478	0.129161	1.05156e-05	3.01514e-05	391.835	32.0738	333.296	37.7849	Y	Y	0	burlywood
UMAG_10428	KIS67781	probable BET2 - geranylgeranyltransferase type II beta subunit	207.715	139.143	173.429	0.560335	0.154126	0.00020486	0.000476384	138.47	11.2307	117.787	17.1625	Y	Y	2	magenta
UMAG_04668	KIS67572	related to nucleotide-binding protein NBP35	80.8214	53.4582	67.1398	0.559582	0.219593	0.00783757	0.0140758	45.0328	7.53163	38.1673	7.38365	N	Y	0	yellow
UMAG_04157	KIS67653	hypothetical protein	44.4093	28.907	36.6582	0.559423	0.27986	0.0321932	0.0506745	25.7407	8.04629	21.3772	4.07611	N	Y	4	magenta
UMAG_01146	KIS71243	hypothetical protein	60.8621	39.3807	50.1214	0.559266	0.293605	0.0398287	0.0614553	28.8598	6.62698	23.967	11.5994	N	Y	2	burlywood
UMAG_11669	KIS70315	related to syntaxin family member TLG1	93.4544	61.8876	77.671	0.559223	0.216806	0.00716905	0.0129617	85.1451	10.7701	71.8544	19.1797	Y	Y	0	burlywood
UMAG_02910	KIS68925	hypothetical protein	115.736	76.6785	96.2073	0.559131	0.222024	0.00849364	0.0151196	59.2984	13.3958	49.5903	8.93065	Y	Y	0	yellow
UMAG_12074	KIS69493	probable NMA2 - nicotinate-nucleotide adenylyltransferase	104.245	69.5041	86.8747	0.558606	0.191994	0.0026441	0.00517445	39.9289	5.13864	33.6374	4.69798	N	Y	1	dark-green
UMAG_01864	KIS70707	related to TDA10 - ATP-binding protein of unknown function	151.496	99.6147	125.555	0.558543	0.242415	0.015225	0.0256932	39.1431	6.00179	33.112	14.8145	N	Y	1	light-cyan
UMAG_05364	KIS66369	related to Formin binding protein 3	166.905	111.687	139.296	0.558071	0.170703	0.000794114	0.0016925	56.7611	9.61368	48.0108	4.63756	Y	Y	12	green
UMAG_10702	KIS66777	probable RPL9A - ribosomal protein L9.e	575.774	384.364	480.069	0.557537	0.186877	0.00208659	0.00416286	663.537	113.057	562.182	118.45	Y	Y	0	yellow
UMAG_05541	KIS66550	hypothetical protein	154.533	103.035	128.784	0.557466	0.194771	0.00307185	0.00594137	55.2325	3.40246	46.6788	11.8701	Y	Y	2	cyan
UMAG_11859	KIS71214	probable HIS3 - imidazoleglycerol-phosphate dehydratase	241.51	162.304	201.907	0.55702	0.151207	0.000170114	0.000400779	257.543	32.7787	219.5	11.7526	Y	Y	0	yellow
UMAG_00980	KIS71068	related to ALG13 - catalytic component of UDP-GlcNAc transferase	202.284	135.103	168.694	0.556862	0.187792	0.00221387	0.0043955	151.674	31.9903	128.319	17.9024	Y	Y	1	red
UMAG_04046	KIS68005	related to aldehyde dehydrogenase	589.038	396.274	492.656	0.556856	0.144877	8.96278e-05	0.000222862	257.358	36.91	219.147	20.9803	Y	Y	8	light-cyan
UMAG_10433	KIS67795	probable Rpo26 - 18kD subunit of DNA-directed RNA polymerases I	154.544	103.802	129.173	0.556808	0.153776	0.000217781	0.000504253	248.922	6.96195	212.221	22.1284	Y	Y	0	yellow
UMAG_10507	KIS68243	probable ubiquinol-cytochrome-c reductase Rieske iron-sulfur protein	1764.69	1189.48	1477.08	0.55655	0.132422	1.96483e-05	5.41733e-05	1383.96	215.48	1179.78	40.8331	Y	Y	0	yellow
UMAG_00922	KIS71004	related to TFIIH basal transcription factor complex p34 subunit	137.127	91.6798	114.403	0.556348	0.179279	0.00141013	0.0029048	72.6552	10.4226	61.7448	10.2544	Y	Y	0.5	dark-green
UMAG_01357	KIS71463	hypothetical protein	33.1016	21.3075	27.2045	0.555459	0.323597	0.05967	0.0883493	50.7966	18.0468	41.3826	8.02753	Y	Y	6	cyan
UMAG_04378	KIS67276	related to phenylacetaldehyde dehydrogenase	69.3034	46.0959	57.6996	0.55464	0.210856	0.00623318	0.0114101	28.0628	1.38831	23.7138	4.92506	Y	Y	0.5	light-cyan
UMAG_02905	KIS68920	probable RPN1 - 26S proteasome regulatory subunit	1593.32	1073.15	1333.24	0.554086	0.150114	0.000166575	0.000392871	377.726	78.6404	321.603	13.6647	Y	Y	0	yellow
UMAG_10623	KIS71022	related to Tuberin	472.289	318.808	395.548	0.553992	0.133789	2.58422e-05	6.99667e-05	48.9658	5.39499	41.9569	4.27497	N	Y	0.5	light-cyan
UMAG_03460	KIS68366	hypothetical protein	579.573	391.142	485.357	0.553217	0.140412	6.06933e-05	0.000154544	454.371	64.4534	388.519	35.8525	Y	Y	12	light-cyan
UMAG_11268	KIS71129	related to NADPH	521.151	351.478	436.314	0.553074	0.14375	8.89582e-05	0.000221453	194.33	6.04641	166.421	31.03	Y	Y	0	yellow
UMAG_01608	KIS70432	related to UTP30 - subunit of U3-containing 90S pre-ribosome	266.989	179.703	223.346	0.552893	0.163823	0.000546069	0.00119418	152.258	13.5853	128.917	19.3864	Y	Y	0	yellow
UMAG_04414	KIS67313	hypothetical protein	47.2283	31.2239	39.2261	0.552232	0.252348	0.0205975	0.0337716	46.5196	9.49268	38.7292	3.14372	Y	Y	0	yellow
UMAG_01104	KIS71196	related to TFA2 - TFIIE small subunit	55.3846	35.7753	45.58	0.551943	0.318869	0.0581692	0.0863053	48.1371	22.9531	39.8634	7.22151	Y	Y	4	salmon
UMAG_04335	KIS67231	hypothetical protein	1716.62	1132.2	1424.41	0.551006	0.257449	0.0231164	0.0374935	576.045	89.0686	478.848	207.101	Y	Y	8	cyan
UMAG_10298	KIS69302	hypothetical protein	117.858	79.3607	98.6092	0.55004	0.172525	0.0010615	0.00222062	54.0261	5.07917	45.9597	4.05228	Y	Y	8	beige
UMAG_01843	KIS70685	probable acetyl-CoA C-acyltransferase precursor	444.628	300.878	372.753	0.549867	0.13772	4.88677e-05	0.000126274	240.101	21.7839	206.165	27.1651	Y	Y	0.5	green
UMAG_01679	KIS70508	probable MCM3 - subunit of pre-replication complex	116.252	77.9895	97.1208	0.549741	0.18451	0.00213999	0.00426413	28.6334	3.15427	24.5238	4.34139	N	Y	0	yellow
UMAG_12353	KIS71054	related to ELF1 û transcription elongation factor	24.1145	15.4879	19.8012	0.549736	0.335355	0.0703738	0.102414	61.5956	16.8981	49.6341	13.8405	Y	Y	0	beige
UMAG_05496	KIS66503	related to cystathionine beta-lyase	798.019	535.744	666.881	0.549463	0.187146	0.00244999	0.00482473	187.903	53.1116	159.307	9.36498	Y	Y	0	yellow
UMAG_04495	KIS67395	related to COQ4 - responsible for restoring ubiquinone biosynthesis in coq4 mutant	157.654	106.328	131.991	0.548724	0.165779	0.000694291	0.00149454	95.5988	8.03858	81.6935	12.5795	Y	Y	2	yellow
UMAG_04622	KIS67523	probable AMD1 - AMP deaminase	130.182	87.4353	108.809	0.548696	0.180175	0.00172763	0.00350517	30.6047	3.72867	26.1307	5.51214	N	Y	8	cyan
UMAG_10021	KIS71652	probable uracil phosphoribosyltransferase	128.61	86.1735	107.392	0.54787	0.202934	0.00510568	0.00949416	133.997	21.0166	114.047	24.9804	Y	Y	0.5	light-cyan
UMAG_03550	KIS68463	related to RPB3 - DNA-directed RNA polymerase II chain	224.122	151.829	187.975	0.547086	0.141777	8.56328e-05	0.000214165	152.193	10.6912	130.519	13.2854	Y	Y	0	yellow
UMAG_00340	KIS71911	related to syntaxin 18	133.765	90.3111	112.038	0.546736	0.170354	0.000999079	0.0021038	75.4577	7.71711	64.4372	7.63767	Y	Y	2	cyan
UMAG_01896	KIS70741	related to PET191 - involved in assembly of cytochrome oxidase	26.9353	17.4938	22.2146	0.546688	0.318877	0.0607351	0.0897207	62.4749	15.573	51.1792	12.4448	Y	Y	0	yellow
UMAG_04426	KIS67326	hypothetical protein	364.116	246.703	305.41	0.546438	0.143578	0.000105777	0.000258637	196.82	21.1208	169.108	23.4016	Y	Y	12	dark-green
UMAG_10661	KIS68188	related to GCD10 - translation initiation factor eIF3 RNA-binding subunit	162.184	109.27	135.727	0.546384	0.185161	0.00234579	0.00463845	64.4068	6.52232	54.6878	8.80851	Y	Y	0	yellow
UMAG_03930	KIS67874	hypothetical protein	119.602	80.0352	99.8188	0.546318	0.215264	0.00817565	0.014621	74.5796	16.3406	63.078	12.4683	Y	Y	0	yellow
UMAG_11327	KIS71505	probable SEC27 - coatomer complex beta subunit	676.575	458.624	567.599	0.545981	0.144336	0.000116385	0.000282013	182.778	24.5174	156.835	21.3562	Y	Y	2	light-green
UMAG_10621	KIS71008	probable 60S ribosomal protein L32	477.498	319.535	398.517	0.54504	0.217531	0.00893887	0.0158206	813.711	246.99	691.456	109.256	Y	Y	0	yellow
UMAG_00728	KIS72320	related to Origin recognition complex subunit 4	43.6131	28.4135	36.0133	0.544343	0.302852	0.0513646	0.0771125	13.8084	3.75559	11.5662	4.94689	N	Y	0	yellow
UMAG_02133	KIS69598	hypothetical protein	80.6166	54.175	67.3958	0.543512	0.206651	0.00630387	0.0115265	50.471	3.5206	43.0111	7.6482	Y	Y	0	yellow
UMAG_02920	KIS68935	related to TFIIIC subunit	98.5239	65.5809	82.0524	0.543505	0.24107	0.0176053	0.0293953	81.9758	18.7486	69.653	18.7532	Y	Y	0.5	burlywood
UMAG_02420	KIS69906	related to HRP1 - subunit of cleavage factor I	383.328	260.735	322.031	0.543478	0.133377	3.47713e-05	9.19228e-05	145.971	11.6568	125.664	12.4055	Y	Y	0	burlywood
UMAG_01832	KIS70672	hypothetical protein	114.502	77.3835	95.9429	0.543371	0.170246	0.00105991	0.00221801	54.4348	3.74797	46.5867	5.35541	Y	Y	6	magenta
UMAG_11455	KIS72235	hypothetical protein	155.575	104.861	130.218	0.542204	0.191081	0.00337828	0.00647204	58.0933	14.0627	49.7162	5.80277	Y	Y	2	magenta
UMAG_10127	KIS69830	probable 60s ribosomal protein L21-A	457.137	308.559	382.848	0.542121	0.186646	0.00273007	0.00533139	635.407	54.1766	542.773	131.994	Y	Y	0	yellow
UMAG_10236	KIS71419	probable RPS11B - ribosomal protein S11B	559.034	379.636	469.335	0.541943	0.151714	0.000265052	0.000607607	786.808	50.9653	676.516	108.533	Y	Y	0	yellow
UMAG_12269	KIS67404	related to CYB2 - lactate dehydrogenase cytochrome b2	136.821	92.3701	114.595	0.541781	0.182604	0.00224652	0.00445443	73.1032	6.74788	62.6942	13.2811	Y	Y	0.5	dark-green
UMAG_10766	KIS70203	related to TRM112 - subunit of tRNA methyltransferase complex	43.6285	29.0882	36.3583	0.541347	0.252388	0.023222	0.0376447	74.8119	8.46774	62.7912	9.35952	Y	Y	0	yellow
UMAG_03946	KIS67891	hypothetical protein	144.458	96.9374	120.697	0.540708	0.214683	0.00868163	0.0154033	42.424	8.39777	36.527	9.35032	Y	Y	2	light-green
UMAG_04672	KIS67575	related to CTL1 - RNA 5`-triphosphatase with manganese- or cobalt-dependent NTPase activities	78.5444	52.5927	65.5685	0.540286	0.234573	0.0155709	0.0262454	63.9345	13.651	54.0397	9.88283	Y	Y	0	pink
UMAG_00291	KIS71863	hypothetical protein	303.219	206.418	254.818	0.5391	0.147849	0.000201033	0.000467822	125.536	9.82075	108.319	17.0164	Y	Y	1	light-cyan
UMAG_11725	KIS69403	hypothetical protein	190.23	127.638	158.934	0.538895	0.221979	0.0112021	0.0194218	89.0405	13.2594	76.1891	24.3113	Y	Y	8	light-cyan
UMAG_10595	KIS71325	hypothetical protein	246.248	167.082	206.665	0.538682	0.167848	0.00100006	0.00210504	77.4077	12.2879	66.7953	11.6229	Y	Y	8	salmon
UMAG_01860	KIS70702	related to PTH2 - aminoacyl-tRNA hydrolase	26.9395	17.7312	22.3353	0.537861	0.299453	0.0519466	0.0779501	30.4199	5.23938	25.6876	2.57618	Y	Y	2	yellow
UMAG_03770	KIS68191	hypothetical protein	237.441	161.96	199.7	0.537638	0.141638	0.000111491	0.00027117	101.136	10.7582	87.4571	5.3395	Y	Y	0	yellow
UMAG_05504	KIS66511	related to glutathione synthase	143.025	96.8031	119.914	0.537406	0.186707	0.00296669	0.00575521	59.1149	8.91921	50.685	9.9008	Y	Y	4	cyan
UMAG_00064	KIS71622	related to pepsin precursor (aspartate protease)	4.61389	2.3782	3.49604	0.53727	0.634889	0.222523	0.281586	2.57995	1.63014	1.80484	0.599935	N	N	0.5	red
UMAG_03608	KIS68521	related to RRP14 - protein involved in Ribosomal RNA Processing	238.503	161.658	200.08	0.536113	0.192388	0.00396929	0.00752615	95.0846	10.4176	80.8535	17.6066	N	Y	2	green-yellow
UMAG_04188	KIS67687	probable PRP16 - RNA-dependent ATPase	310.891	211.882	261.387	0.535988	0.154895	0.00040792	0.000910247	53.2849	8.25265	45.9206	5.05702	N	Y	0.5	light-cyan
UMAG_11383	KIS70851	hypothetical protein	287.833	196.175	242.004	0.534991	0.156305	0.000469577	0.00103815	70.0194	7.64907	60.6744	10.9991	N	Y	0.5	green
UMAG_01709	KIS70541	hypothetical protein	108.119	72.9327	90.5258	0.534809	0.21762	0.0103664	0.0180553	40.4893	7.82511	34.3773	7.48327	Y	Y	0	pink
UMAG_03192	KIS68616	hypothetical protein	263.48	180.034	221.757	0.534808	0.146397	0.000196208	0.000456759	297.063	40.4972	256.49	9.32906	Y	Y	0	yellow
UMAG_01505	KIS70333	probable HTB2 - histone H2B.2	274.505	187.275	230.89	0.534127	0.158194	0.000555487	0.00121272	430.947	46.5591	372.289	61.8205	Y	Y	0	yellow
UMAG_00912	KIS70994	related to COX18 - mitochondrial inner membrane protein required for membrane insertion of C-terminus of Cox2p	86.2474	57.9502	72.0988	0.533639	0.225799	0.0134492	0.0230029	44.9003	6.80941	38.6069	11.9472	Y	Y	0	burlywood
UMAG_12243	KIS68275	related to swi/snf-related matrix-associated actin-dependent regulator of chromatin	530.508	358.031	444.269	0.533304	0.217135	0.010413	0.0181316	110.213	34.5417	94.0776	18.7966	Y	Y	12	magenta
UMAG_00737	KIS72330	probable splicing factor 3B subunit 3	251.517	170.634	211.075	0.533061	0.192783	0.00426817	0.00803859	46.0778	12.1437	39.7522	4.20903	N	Y	0	yellow
UMAG_00459	KIS72037	related to Condensin complex subunit 3	241.359	164.066	202.713	0.532778	0.186022	0.00313775	0.00605432	51.9308	8.77007	44.6447	8.69776	N	Y	2	yellow
UMAG_05595	KIS66606	probable VTC1 - protein controls Sec18p/NSF-dependent priming of SNAREs and HOPS	150.434	102.454	126.444	0.532087	0.180042	0.00234433	0.00463721	273.973	41.5564	236.3	23.4839	Y	Y	6	beige
UMAG_11616	KIS72272	related to TIM13 - Translocase of the inner membrane	65.4582	44.3062	54.8822	0.532062	0.210101	0.00846451	0.0150768	137.806	3.41619	118.586	17.42	Y	Y	0	yellow
UMAG_03726	KIS68144	putative CPR1 - cyclophilin (peptidylprolyl isomerase) (isoform A)	3753.85	2575.1	3164.48	0.531926	0.132265	4.46353e-05	0.000116174	4718.64	411.152	4091.58	301.389	Y	Y	0	yellow
UMAG_00072	KIS71630	hypothetical protein	988.125	678.332	833.229	0.531638	0.125759	1.80651e-05	5.01507e-05	448.363	43.2842	389.521	32.6778	Y	Y	0	burlywood
UMAG_11121	KIS67686	probable ATX1 - antioxidant protein and metal homeostasis factor	106.519	71.8908	89.2051	0.530799	0.226755	0.0142719	0.0242431	328.008	94.9695	279.501	38.6414	Y	Y	4	magenta
UMAG_04579	KIS67481	related to TRX2 - thioredoxin II	356.496	241.056	298.776	0.530797	0.216258	0.0105019	0.0182815	83.5721	20.4192	72.1044	16.8048	N	Y	1	light-cyan
UMAG_00532	KIS72110	hypothetical protein	418.971	287.671	353.321	0.530342	0.127431	2.41975e-05	6.58172e-05	169.752	7.23987	148.171	22.0496	Y	Y	8	cyan
UMAG_10462	KIS72135	hypothetical protein	408.303	275.763	342.033	0.529928	0.224599	0.0135675	0.0231867	166.54	19.4467	142.546	50.3545	Y	Y	0.5	red
UMAG_05370	KIS66376	hypothetical protein	54.9081	36.9881	45.9481	0.529694	0.232296	0.0168094	0.028161	24.2333	3.77939	20.7097	3.21283	N	Y	8	cyan
UMAG_00210	KIS71775	hypothetical protein	4509.46	3081.93	3795.7	0.529658	0.165713	0.00105352	0.0022068	2369.96	417.25	2050.05	370.979	Y	Y	0.5	dark-green
UMAG_01439	KIS71546	related to FRE3 - Ferric reductase	11.5644	6.6524	9.10838	0.528372	0.542497	0.203416	0.260006	3.64142	3.1008	2.65832	0.895443	N	N	1	red
UMAG_02020	KIS70876	hypothetical protein	73.6566	49.8281	61.7423	0.528098	0.225505	0.0142951	0.0242762	73.9235	15.0598	63.3294	9.01599	Y	Y	2	green-yellow
UMAG_11988	KIS67416	hypothetical protein	32.856	21.7785	27.3172	0.52773	0.298138	0.0555413	0.0828821	44.7119	14.0442	38.1088	3.00499	Y	Y	0	salmon
UMAG_10154	KIS69918	related to glutamyl-tRNA synthetase	157.698	107.341	132.519	0.527666	0.194783	0.00508237	0.0094617	61.9701	10.5879	53.2594	11.146	Y	Y	2	yellow
UMAG_02793	KIS69462	related to putative acyltransferase	58.8587	38.1094	48.484	0.527024	0.359101	0.0995645	0.139863	18.9191	10.3887	15.6634	7.28876	N	N	12	green
UMAG_06405	KIS65705	related to AMME syndrome candidate gene 1 protein	512.388	352.089	432.238	0.526876	0.143311	0.000179897	0.000421828	472.148	50.7496	411.059	46.8646	Y	Y	12	magenta
UMAG_10287	KIS69272	probable calnexin (C-terminal fragment)	2665.94	1827.33	2246.64	0.526845	0.159551	0.000724329	0.00155524	1139.05	78.3422	983.153	162.275	Y	Y	2	light-green
UMAG_02148	KIS69613	related to positive effector protein GCN20	143.96	98.3493	121.155	0.526511	0.178486	0.00242058	0.00477317	37.0532	4.24648	32.2169	5.60238	N	Y	0.5	red
UMAG_03366	KIS68800	related to PBY1 - putative tubulin tyrosine ligase	91.1413	62.3104	76.7258	0.526108	0.182307	0.00295899	0.00574199	39.5892	2.26714	34.4102	2.46339	Y	Y	0	yellow
UMAG_01752	KIS70585	related to NNT1 - putative nicotinamide N-methyltransferase	353.644	242.655	298.15	0.5261	0.156288	0.00058174	0.00126619	204.943	18.2957	178.6	31.1793	Y	Y	2	yellow
UMAG_00769	KIS72365	related to MMS21 - SUMO ligase and component of the SMC5-SMC6 complex	41.3185	27.738	34.5282	0.526041	0.259157	0.0312909	0.0494228	27.9327	3.69475	23.9454	5.18381	Y	Y	1	green
UMAG_04809	KIS66746	related to EBP2 - required for pre-rRNA processing and ribosomal subunit assembly	314.172	211.436	262.804	0.525972	0.251724	0.0270022	0.0431875	115.709	19.3075	97.7463	39.5749	Y	Y	2	green-yellow
UMAG_11335	KIS71524	hypothetical protein	105.982	72.3378	89.1597	0.524342	0.190697	0.00452455	0.00848188	67.6706	9.54414	58.8739	9.21509	Y	Y	0	pink
UMAG_11198	KIS72356	hypothetical protein	184.645	126.451	155.548	0.524246	0.17198	0.00175436	0.00355494	30.2282	4.87812	26.2971	4.3534	N	Y	4	light-green
UMAG_02091	KIS69554	related to MRF1 - peptide chain release factor	270.755	185.772	228.264	0.524197	0.168971	0.00145928	0.00299744	121.775	20.493	105.473	10.6792	Y	Y	0	yellow
UMAG_01189	KIS71289	probable EFB1 - translation elongation factor eEF1beta	3937.27	2720.52	3328.9	0.523415	0.116657	5.45109e-06	1.63103e-05	3903.74	296.045	3406.85	159.44	Y	Y	0	yellow
UMAG_02347	KIS69826	hypothetical protein	743.8	512.473	628.136	0.52341	0.142077	0.000176011	0.000413166	333.017	46.0911	290.357	33.3928	Y	Y	0	burlywood
UMAG_04050	KIS68009	probable GUA1 - GMP synthase (glutamine-hydrolyzing)	466.368	319.941	393.154	0.523268	0.173081	0.00190345	0.00382585	192.049	29.4218	166.018	25.9681	Y	Y	0	yellow
UMAG_03006	KIS69026	probable Aldo-keto reductase yakc [NADP ]	773.052	533.379	653.215	0.522804	0.130944	4.94496e-05	0.000127574	508.006	42.8017	444.892	60.1053	Y	Y	12	light-cyan
UMAG_11318	KIS71489	probable N-terminal acetyltransferase complex subunit ARD1	93.7192	63.7871	78.7532	0.522579	0.211481	0.0101515	0.0177384	137.295	29.4026	118.436	18.1262	Y	Y	0	yellow
UMAG_03950	KIS67897	related to YRB2 - Ran-GTPase-binding protein involved in nuclear protein export	155.359	106.679	131.019	0.522145	0.16878	0.00151054	0.00309093	75.588	10.0381	65.705	8.63599	Y	Y	0	pink
UMAG_01790	KIS70625	related to DNA ligase	138.163	93.8153	115.989	0.521454	0.227843	0.0165389	0.0277294	38.548	13.2072	33.0834	5.2476	N	Y	0.5	green
UMAG_01475	KIS70302	hypothetical protein	34.1293	22.6447	28.387	0.521197	0.305178	0.0637316	0.0938041	21.0541	7.16294	17.7215	3.73827	Y	Y	2	yellow
UMAG_11474	KIS68840	related to Tumor susceptibility gene 101 protein	112.412	76.2486	94.3303	0.520944	0.229986	0.017603	0.0293953	36.8908	6.45775	31.992	9.35181	N	Y	6	light-green
UMAG_10882	KIS67634	probable peptidyl-prolyl cis-trans isomerase (C-terminal fragment)	31.8305	21.2175	26.524	0.520626	0.291379	0.0541962	0.0809892	45.1948	6.77279	38.0563	10.8757	N	N	0.5	burlywood
UMAG_12091	KIS71738	hypothetical protein	94.4728	64.6515	79.5621	0.519899	0.198262	0.0066254	0.012053	141.142	22.9699	122.494	13.2135	Y	Y	8	cyan
UMAG_11753	KIS67223	hypothetical protein	139.375	95.9848	117.68	0.518374	0.169234	0.00167984	0.0034125	87.8362	8.46566	76.9862	9.51685	Y	Y	0.5	light-cyan
UMAG_06014	KIS65927	hypothetical protein	55.9712	37.9541	46.9626	0.518311	0.238756	0.0224549	0.0365756	122.757	24.4079	106.116	21.4009	Y	Y	0	salmon
UMAG_11934	KIS68929	hypothetical protein	62.346	42.367	52.3565	0.518233	0.23588	0.0210156	0.0343873	50.5481	8.57593	44.0145	9.54772	Y	Y	0	yellow
UMAG_06010	KIS65923	alpha-isopropylmalate isomerase	1924.91	1335.14	1630.02	0.51822	0.118017	8.66813e-06	2.50766e-05	556.993	15.7173	488.026	31.8289	Y	Y	2	light-green
UMAG_11482	KIS68859	probable Ubiquitin-conjugating enzyme E2	204.825	139.834	172.33	0.518149	0.217345	0.0128984	0.0221429	256.302	57.866	220.419	41.378	Y	Y	0	beige
UMAG_03446	KIS68351	probable protein kinase DBF2	123.25	84.3455	103.798	0.517775	0.202037	0.00787257	0.0141347	48.7194	7.66919	42.458	9.47577	Y	Y	4	light-green
UMAG_05755	KIS66973	hypothetical protein	80.9209	54.7897	67.8553	0.517736	0.244967	0.0258234	0.0414972	36.8143	12.118	31.7068	7.22525	N	Y	4	light-cyan
UMAG_01150	KIS71249	related to COX7 - cytochrome-c oxidase	161.603	109.957	135.78	0.517537	0.232405	0.0194668	0.0321133	548.349	168.808	473.372	46.3331	Y	Y	0	yellow
UMAG_04172	KIS67668	hypothetical protein	130.633	89.8264	110.23	0.517175	0.184262	0.00382173	0.00726128	46.8056	4.93527	40.7842	6.20529	Y	Y	2	yellow
UMAG_03408	KIS68309	related to Salicylate hydroxylase	24.911	16.4916	20.7013	0.516986	0.322597	0.0789762	0.113577	12.3759	3.69801	10.4666	1.6724	N	Y	1	red
UMAG_01922	KIS70769	hypothetical protein	42.8769	28.8054	35.8411	0.516133	0.275312	0.0450658	0.0686359	24.4857	2.47752	21.1633	7.52811	N	Y	12	beige
UMAG_02005	KIS70860	hypothetical protein	113.502	77.4733	95.4876	0.515393	0.226556	0.017255	0.0288402	40.302	11.092	34.4661	6.48126	Y	Y	8	cyan
UMAG_11038	KIS66164	probable NADH-ubiquinone oxidoreductase 19.3 kDa subunit	639.407	444.184	541.795	0.514141	0.129072	5.27701e-05	0.000135437	582.433	68.1995	512.706	36.964	Y	Y	0	yellow
UMAG_01329	KIS71430	probable IDH1 - isocitrate dehydrogenase [NAD] subunit 1	1002.81	699.176	850.996	0.513159	0.104028	6.33318e-07	2.15102e-06	579.355	31.2627	510.986	13.9519	Y	Y	0	yellow
UMAG_06243	KIS65868	related to ULS1 û ubiquitin ligase for SUMO conjugates	117.813	80.5428	99.1782	0.512555	0.219122	0.0146753	0.0248565	26.714	3.68112	23.4185	7.89661	N	Y	8	light-green
UMAG_10719	KIS66850	hypothetical protein	125.004	86.2533	105.628	0.512473	0.178718	0.00318278	0.00613022	75.0213	8.54008	65.9451	9.86396	Y	Y	4	magenta
UMAG_00183	KIS71748	related to SWD1 - subunit of the COMPASS complex	111.401	76.6767	94.039	0.512423	0.197062	0.00710779	0.0128653	43.4255	8.1045	37.9754	3.92609	Y	Y	0.5	beige
UMAG_10135	KIS69849	related to MCM10 - essential chromatin-associated protein involved in the initiation of DNA replication	63.9204	43.5641	53.7423	0.512329	0.242301	0.0260889	0.0418719	14.2394	3.79392	12.2336	2.13179	N	N	0	yellow
UMAG_00361	KIS71934	related to MNR2 - Manganese resistance protein	186.678	129.235	157.956	0.511463	0.166186	0.00161058	0.0032842	47.5315	8.82688	41.6683	3.43464	N	Y	2	yellow
UMAG_04115	KIS67613	probable LYS20 - homocitrate synthase	1004.85	697.73	851.288	0.51133	0.148932	0.000461923	0.00102274	502	48.8281	440.346	51.4507	Y	Y	2	yellow
UMAG_00811	KIS72412	related to 50S ribosomal protein L1	118.085	81.5462	99.8158	0.511187	0.18607	0.00460947	0.00863106	75.0197	7.37357	65.4321	11.0698	Y	Y	0	yellow
UMAG_10520	KIS67317	related to REX2 - Oligoribonuclease	111.693	77.2116	94.4524	0.51094	0.18104	0.00366462	0.00697508	110.319	17.5075	96.5113	2.36671	Y	Y	4	green
UMAG_10407	KIS67725	hypothetical protein	39.7519	26.7617	33.2568	0.510723	0.287833	0.0562531	0.0837702	27.9522	9.19759	23.8525	3.99417	Y	Y	0	burlywood
UMAG_06226	KIS65848	hypothetical protein	1165.53	808.043	986.788	0.509954	0.165193	0.00156098	0.00318608	315.419	49.58	275.277	38.9999	Y	Y	2	magenta
UMAG_11120	KIS67681	hypothetical protein	73.6628	50.7539	62.2084	0.509535	0.201621	0.00880916	0.0156124	187.425	11.3511	163.527	23.5792	Y	Y	0	yellow
UMAG_05475	KIS66481	hypothetical protein	325.826	226.234	276.03	0.509207	0.158315	0.0010015	0.00210739	190.491	19.9904	166.984	28.3107	Y	Y	6	cyan
UMAG_04413	KIS67312	related to transport protein USO1	395.914	272.444	334.179	0.50912	0.206295	0.0103658	0.0180553	64.8038	16.4238	56.7335	13.1558	N	Y	2	magenta
UMAG_05286	KIS66286	related to GS1 protein	245.727	170.858	208.292	0.508564	0.148742	0.000489183	0.00107817	191.963	26.4156	169.393	16.986	Y	Y	1	burlywood
UMAG_04795	KIS66731	nucleoporin	239.517	166.721	203.119	0.508423	0.143589	0.000310862	0.000706604	61.4537	1.46491	54.155	6.75838	Y	Y	2	light-green
UMAG_03635	KIS68548	hypothetical protein	26.9548	17.9308	22.4428	0.507656	0.329281	0.0896782	0.127267	7.26144	2.67391	6.0849	1.47457	N	N	12	#N/A
UMAG_04180	KIS67676	related to MTW1 - component of the MIND kinetochore complex	65.9632	45.4722	55.7177	0.507196	0.206818	0.0108826	0.0188983	35.2362	4.01666	30.6459	1.48573	Y	Y	0	pink
UMAG_10353	KIS66536	related to OCA1 - putative protein tyrosine phosphatase	113.946	79.1135	96.5297	0.506971	0.17297	0.00261446	0.00512576	95.3166	7.84454	83.5791	2.75553	Y	Y	0	pink
UMAG_02156	KIS69621	hypothetical protein	46.2115	31.6614	38.9365	0.506602	0.240277	0.0265111	0.0425073	22.7912	2.66608	19.6696	2.33723	N	Y	0	beige
UMAG_05610	KIS66622	probable UGA2 - succinate semialdehyde dehydrogenase	369.743	257.432	313.587	0.505798	0.158666	0.00111287	0.00231982	165.187	13.6414	145.078	25.5522	Y	Y	4	cyan
UMAG_02350	KIS69828	probable CCT6 - component of chaperonin-containing T-complex (zeta subunit)	1227.77	853.629	1040.7	0.505643	0.166578	0.00186152	0.00375091	484.153	16.2008	423.242	79.8032	Y	Y	2	yellow
UMAG_03830	KIS68248	hypothetical protein	166.315	114.903	140.609	0.504961	0.196996	0.00799052	0.0143226	44.8808	4.90738	39.6382	10.83	N	Y	2	light-green
UMAG_00047	KIS71604	hypothetical protein	68.5177	47.3454	57.9315	0.504934	0.21195	0.0131687	0.0225709	70.8774	7.48742	62.1827	6.5208	Y	Y	0.5	green
UMAG_11208	KIS66017	hypothetical protein	187.135	128.991	158.063	0.504784	0.219764	0.0164749	0.0276308	84.1019	16.8998	72.7275	16.4906	Y	Y	2	light-green
UMAG_01650	KIS70475	hypothetical protein	65.9803	45.2977	55.639	0.504741	0.226537	0.0197631	0.0325191	37.4298	8.47866	32.6654	5.77496	Y	Y	2	light-green
UMAG_04147	KIS67643	related to EXO84 - exocyst protein essential for secretion	205.894	143.316	174.605	0.504385	0.157755	0.00108329	0.00226475	57.0673	6.6036	50.4706	8.65191	Y	Y	2	red
UMAG_10539	KIS67357	related to farnesyltranstransferase (al-3)	60.8579	41.8678	51.3628	0.503891	0.225603	0.0194817	0.0321296	36.8255	7.60319	32.0858	4.02498	Y	Y	0	burlywood
UMAG_00125	KIS71684	hypothetical protein	213.585	147.481	180.533	0.503128	0.211097	0.0131379	0.0225241	146.55	34.1252	128.43	27.5058	Y	Y	0	pink
UMAG_11618	KIS72274	related to CYC2 - cytochrome-c mitochondrial import factor	113.229	78.0598	95.6442	0.502949	0.217297	0.0158129	0.0266296	53.6353	14.1198	47.126	7.33389	Y	Y	8	magenta
UMAG_10617	KIS70995	hypothetical protein	82.1511	56.9838	69.5674	0.502242	0.202037	0.00994331	0.0174217	124.341	4.60218	108.947	17.8384	Y	Y	0	yellow
UMAG_02324	KIS69801	related to DNA-directed RNA polymerase 13.3K chain	51.0914	34.9141	43.0027	0.502187	0.257503	0.038647	0.0598274	78.3765	10.0311	67.679	19.8592	Y	Y	0	yellow
UMAG_10715	KIS67185	related to RRP8 - nucleolar protein required for efficient processing of pre-rRNA at site A2	120.628	82.8778	101.753	0.501551	0.242253	0.0291322	0.0463076	47.8439	4.59382	41.4312	14.9736	N	Y	0.5	green
UMAG_11330	KIS71509	related to O-methyltransferase	62.8819	42.2455	52.5637	0.501452	0.310849	0.0787977	0.113446	49.2686	16.1022	42.2512	20.2762	Y	Y	8	light-cyan
UMAG_01221	KIS71321	alpha tubulin	12871.7	9027.25	10949.5	0.500527	0.128381	7.56348e-05	0.000190785	6415.98	750.53	5702.81	408.684	Y	Y	2	yellow
UMAG_05231	KIS70160	related to YIP3 protein - proposed to be involved in ER to Golgi transport	142.671	99.0597	120.865	0.499901	0.196475	0.00846493	0.0150768	190.55	43.5644	167.274	13.9487	Y	Y	0	yellow
UMAG_11316	KIS71481	related to PAC2 - microtubule effector required for tubulin heterodimer formation	164.322	114.26	139.291	0.499545	0.185583	0.00552372	0.0102069	57.8727	11.3828	51.2421	8.13068	Y	Y	2	yellow
UMAG_12199	KIS68969	related to decapping enzyme	91.133	63.2344	77.1837	0.499423	0.196009	0.00840465	0.0149867	49.5785	7.27476	43.9127	6.43186	Y	Y	0	pink
UMAG_11862	KIS71354	hypothetical protein	16.1611	10.544	13.3525	0.499323	0.393368	0.145179	0.194576	44.2657	18.3869	36.6275	10.2231	N	Y	0	yellow
UMAG_01831	KIS70671	hypothetical protein	24.1168	15.9761	20.0464	0.498973	0.354684	0.115756	0.160056	18.3531	7.09994	15.4755	3.97212	Y	Y	8	cyan
UMAG_02732	KIS69398	hypothetical protein	101.118	69.5178	85.318	0.498903	0.24877	0.0340493	0.0533621	302.059	99.5494	261.213	34.5823	Y	Y	2	yellow
UMAG_01647	KIS70472	related to CDC20 - cell division control protein	152.518	106.222	129.37	0.498821	0.17932	0.00420416	0.00793424	63.0397	11.5242	55.9043	7.42813	Y	Y	0	yellow
UMAG_00775	KIS72371	hypothetical protein	364.791	254.604	309.697	0.498667	0.170564	0.00269982	0.00527711	90.4576	17.4783	80.204	12.6322	Y	Y	2	light-green
UMAG_01481	KIS70310	hypothetical protein	3.33957	1.6683	2.50393	0.498609	0.671856	0.256758	0.318727	3.74614	1.29181	2.46522	0.877363	N	N	0.5	#N/A
UMAG_02913	KIS68928	related to TAN1 - putative tRNA acetyltransferase	147.082	102.742	124.912	0.498113	0.175187	0.00347756	0.00664645	77.4517	10.5607	68.2402	6.78389	Y	Y	0	yellow
UMAG_00140	KIS71700	related to tRNA dihydrouridine synthase	49.5781	33.978	41.778	0.498113	0.258035	0.0406092	0.0625652	30.53	8.91188	26.4631	3.00878	Y	Y	6	cyan
UMAG_00698	KIS72290	hypothetical protein	216.952	151.17	184.061	0.4981	0.181723	0.00476855	0.00891086	99.2579	8.18977	88.0498	21.395	Y	Y	12	light-cyan
UMAG_02713	KIS69378	pheromone response factor Prf1	60.0677	41.5459	50.8068	0.497253	0.231081	0.0241165	0.0389773	16.0426	1.96023	14.0073	2.9204	N	N	4	magenta
UMAG_03649	KIS68066	hypothetical protein	34.6793	22.9066	28.793	0.496528	0.366876	0.126903	0.173143	29.7914	16.6322	25.0367	5.77848	Y	Y	6	cyan
UMAG_00438	KIS72016	related to 50S ribosomal protein L35	67.5103	46.9789	57.2446	0.495817	0.203825	0.0116243	0.0200999	105.087	7.75337	92.3075	5.83014	Y	Y	2	yellow
UMAG_00601	KIS72183	related to Splicing factor U2AF-associated protein 2	126.304	88.5033	107.404	0.494447	0.170842	0.00297044	0.00576074	60.8041	6.78511	53.741	2.60002	Y	Y	12	salmon
UMAG_00725	KIS72317	related to UTP11 - subunit of U3-containing small subunit processome complex	125.528	87.7246	106.626	0.494145	0.186146	0.00619272	0.0113425	80.81	12.5697	71.6337	9.65637	Y	Y	1	magenta
UMAG_01690	KIS70519	hypothetical protein	64.3834	44.2176	54.3005	0.493806	0.261922	0.045083	0.0686392	72.2704	18.5553	62.9771	17.1763	Y	Y	2	magenta
UMAG_11574	KIS66449	related to Carboxymuconolactone decarboxylase	30.8193	20.9329	25.8761	0.493156	0.308408	0.0818387	0.117198	40.2749	12.7527	34.5938	4.92705	Y	Y	8	beige
UMAG_03518	KIS68429	related to pyrimidine 5-nucleotidase	303.428	211.001	257.215	0.492689	0.210366	0.0148424	0.0251329	56.2989	7.02598	50.1142	15.9394	N	Y	2	yellow
UMAG_11126	KIS67698	related to TAF5 - subunit of TFIID and SAGA complexes	159.724	110.707	135.215	0.492018	0.225871	0.0225757	0.0367445	41.3927	7.42842	36.5255	11.374	N	Y	1	red
UMAG_03970	KIS67919	hypothetical protein	179.941	126.718	153.33	0.491729	0.143452	0.000482257	0.00106363	113.036	0.942946	101.03	9.4226	Y	Y	0.5	burlywood
UMAG_11288	KIS67857	probable ubiquinol-cytochrome c reductase complex 11 kDa protein	300.723	211.643	256.183	0.491268	0.155377	0.00124033	0.0025673	659.497	89.0984	588.728	41.482	Y	Y	0	yellow
UMAG_11233	KIS65842	probable RPL2A - ribosomal protein L8.e	2098.17	1472.59	1785.38	0.490404	0.173473	0.00368306	0.007004	1840.64	322.843	1638.14	276.285	Y	Y	0	yellow
UMAG_01578	KIS70411	related to cactin	108.869	76.1046	92.4868	0.49019	0.197086	0.0100474	0.017585	33.3898	6.60092	29.6087	3.91417	N	Y	0.5	beige
UMAG_00916	KIS70999	hypothetical protein	111.965	77.8239	94.8943	0.490138	0.218257	0.0191752	0.0316727	26.2667	5.9699	23.2908	5.72491	N	Y	0.5	green
UMAG_10573	KIS68492	probable 60s ribosomal protein L7 subunit	717.661	502.325	609.993	0.490091	0.189552	0.00757199	0.013625	634.596	61.3827	563.166	149.923	Y	Y	0	yellow
UMAG_11180	KIS66608	hypothetical protein	45.164	31.1184	38.1412	0.489958	0.262323	0.0471695	0.071479	117.811	33.2519	103.016	6.34247	Y	Y	0	burlywood
UMAG_00475	KIS72053	hypothetical protein	475.505	332.281	403.893	0.489772	0.198436	0.0105828	0.0184073	58.4814	9.58931	52.0033	14.7128	N	Y	0.5	light-cyan
UMAG_11694	KIS70426	related to EMC4 - member of a transmembrane complex required for efficient folding of proteins in the ER	138.283	96.3909	117.337	0.489715	0.211888	0.0161071	0.0270828	171.564	39.3506	152.076	29.1643	Y	Y	0	yellow
UMAG_03699	KIS68120	related to CAB2 - probable phosphopantothenoylcysteine synthetase	319.052	225.353	272.202	0.489471	0.132475	0.00017502	0.000411249	193.143	10.6593	173.22	18.6011	Y	Y	1	dark-green
UMAG_00123	KIS71682	related to L-lactate dehydrogenase (cytochrome b2)	143.514	101.097	122.306	0.488881	0.154061	0.00119485	0.00247951	55.0635	3.04992	49.1654	4.55301	Y	Y	0	yellow
UMAG_03972	KIS67921	hypothetical protein	265.266	186.622	225.944	0.48749	0.17524	0.00424712	0.00800128	102.085	16.4822	90.4322	11.9361	Y	Y	0	yellow
UMAG_02343	KIS69822	related to excision repair protein RAD4	609.926	431.729	520.827	0.487303	0.133279	0.00020327	0.000472857	184.002	10.2322	164.241	14.8188	Y	Y	2	green-yellow
UMAG_04460	KIS67358	related to RPB8 - DNA-directed RNA polymerase I	69.0598	48.0646	58.5622	0.485715	0.232265	0.0282935	0.045063	95.5195	24.6108	84.4421	12.6842	Y	Y	0	yellow
UMAG_06186	KIS65806	related to oxidoreductase	127.348	88.9901	108.169	0.485338	0.215651	0.0190118	0.0314509	94.9367	13.9369	84.4518	23.6479	Y	Y	6	light-cyan
UMAG_00634	KIS72219	probable NADH-ubiquinone oxidoreductase 24 kDa subunit	575.329	407.206	491.267	0.485252	0.1431	0.000553889	0.00120964	476.361	62.6794	428.221	30.7608	Y	Y	0	yellow
UMAG_10844	KIS67227	hypothetical protein	24.6311	16.5748	20.603	0.484925	0.349727	0.122033	0.167767	58.6686	23.7441	49.8452	9.9498	Y	Y	8	green
UMAG_11617	KIS72273	related to TAZ1 - Lyso-phosphatidylcholine acyltransferase	65.4891	45.8447	55.6669	0.484844	0.215012	0.0188169	0.0311605	36.6625	5.99663	32.4089	2.73145	Y	Y	0	burlywood
UMAG_02523	KIS69172	related to Endoglucanase 1 precursor	17.4417	11.5009	14.4713	0.484709	0.394533	0.15799	0.208971	12.6563	4.38203	10.6372	4.94204	N	Y	2	magenta
UMAG_11738	KIS67917	related to syntaxin binding protein 1	534.492	378.241	456.367	0.484565	0.145422	0.00068609	0.00147837	137.84	15.029	123.729	20.3938	Y	Y	0.5	dark-green
UMAG_04765	KIS66701	probable TRM8 - part of complex required for 7-methylguanosine modification	87.8031	61.1791	74.4911	0.484422	0.239531	0.033285	0.0522402	52.4302	9.53028	45.8893	12.798	Y	Y	0	yellow
UMAG_03933	KIS67877	related to WWM1 - WW domain containing protein interacting with Metacaspase	313.413	222.392	267.903	0.484001	0.13009	0.000159168	0.0003765	277.432	15.9549	249.111	15.155	Y	Y	0	pink
UMAG_10299	KIS69304	related to LUC7 - essential protein associated with the U1 snRNP complex	128.889	90.9235	109.906	0.483645	0.170854	0.00366211	0.00697237	75.998	10.8201	67.7576	4.3397	Y	Y	0	pink
UMAG_01849	KIS70691	related to TPA1 - Poly(A)-binding protein involved in translation termination efficiency	418.7	293.032	355.866	0.483503	0.217186	0.0202443	0.033243	139.123	38.634	122.044	24.9083	Y	Y	0	yellow
UMAG_11425	KIS71799	related to Formyltetrahydrofolate deformylase	367.585	260.411	313.998	0.483317	0.1508	0.00107213	0.00224215	211.437	7.87965	189.031	22.9007	Y	Y	2	yellow
UMAG_04581	KIS67483	hypothetical protein	724.478	507.149	615.814	0.483181	0.213975	0.0186557	0.0309333	413.928	66.925	368.612	116.083	Y	Y	1	red
UMAG_06377	KIS65675	related to translation initiation factor eIF-4E	187.119	132.557	159.838	0.483019	0.147198	0.000823686	0.00175148	148.913	8.89925	134.02	10.8794	Y	Y	0	yellow
UMAG_01772	KIS70607	related to Aldose 1-epimerase precursor	60.316	41.8373	51.0767	0.482918	0.246188	0.0385566	0.0597017	29.1663	1.94206	25.69	8.96785	N	Y	8	cyan
UMAG_05728	KIS66948	hypothetical protein	262.835	185.871	224.353	0.482786	0.15826	0.00181547	0.00366498	179.144	30.9359	160.933	16.6491	Y	Y	0.5	beige
UMAG_10444	KIS68359	putative nitrilase	203.09	142.698	172.894	0.482454	0.200888	0.0127955	0.0219896	134.651	14.3166	119.601	32.9574	Y	Y	0	beige
UMAG_01773	KIS70608	hypothetical protein	73.9373	51.9105	62.9239	0.482105	0.21281	0.0183569	0.0305397	49.468	6.09812	43.5898	7.66466	Y	Y	2	magenta
UMAG_10352	KIS66535	hypothetical protein	32.066	21.9238	26.9949	0.481816	0.316149	0.0957053	0.134989	21.4404	4.77493	18.4283	6.43057	Y	Y	0	burlywood
UMAG_05353	KIS66355	hypothetical protein	199.987	141.365	170.676	0.481513	0.165804	0.00292688	0.00568651	47.535	7.44007	42.6114	6.26512	N	Y	2	yellow
UMAG_03237	KIS68666	probable 40s ribosomal protein s20	537.77	379.568	458.669	0.481375	0.17881	0.00560407	0.0103435	976.864	155.734	874.742	155.549	Y	Y	0	yellow
UMAG_02564	KIS69216	related to RRP7 - essential protein involved in rRNA processing and ribosome biogenesis	144.018	101.588	122.803	0.481346	0.184374	0.00713418	0.0129059	85.6611	6.55538	76.269	14.8068	Y	Y	2	green-yellow
UMAG_00083	KIS71642	related to formate/nitrite transporter	18.4645	12.115	15.2898	0.481175	0.403301	0.167686	0.219994	13.3163	6.05265	11.0752	4.7078	N	Y	0.5	light-cyan
UMAG_11024	KIS66127	hypothetical protein	92.9091	65.4494	79.1793	0.480695	0.189115	0.00872022	0.0154675	58.6556	6.61247	52.3611	6.51765	Y	Y	1	green
UMAG_04592	KIS67495	hypothetical protein	416.19	296.526	356.358	0.479671	0.119681	4.9226e-05	0.000127119	228.695	14.8374	206.467	14.8686	Y	Y	4	light-green
UMAG_06429	KIS65729	hypothetical protein	261.125	185.732	223.428	0.478987	0.135467	0.0003263	0.000738059	183.179	16.3017	164.87	15.3803	Y	Y	4	beige
UMAG_03555	KIS68468	probable QNS1 - Glutamine-dependent NAD Synthetase	215.904	153.13	184.517	0.478924	0.158788	0.00204177	0.004081	62.9683	9.15401	56.6525	4.74435	Y	Y	0	burlywood
UMAG_00011	KIS71565	probable AMD2 - amidase	118.578	84.0353	101.307	0.478015	0.170096	0.00394093	0.00747457	47.2823	3.76151	42.4544	3.19499	Y	Y	2	magenta
UMAG_05471	KIS66477	related to ISA1 - mitochondrial matrix protein involved in biogenesis of the iron-sulfur cluster of Fe/S proteins	118.104	83.6269	100.865	0.477508	0.183868	0.00744311	0.0134009	122.563	15.7957	109.309	10.6244	Y	Y	4	green
UMAG_02762	KIS69431	related to Enoyl-CoA hydratase	45.7292	31.7155	38.7223	0.477287	0.265457	0.0557276	0.0831217	30.3837	7.96138	26.7151	6.02217	Y	Y	0.5	burlywood
UMAG_05572	KIS66584	related to PCH2 - putative ATPase	80.5672	56.8121	68.6896	0.477283	0.204515	0.0154557	0.026062	39.2941	5.84169	35.1167	2.55941	Y	Y	0	yellow
UMAG_02768	KIS69436	hypothetical protein	60.7973	42.5609	51.6791	0.476063	0.246006	0.0411209	0.0632329	119.586	26.6855	105.172	16.5652	Y	Y	0	yellow
UMAG_05415	KIS66424	related to tetratricopeptide repeat protein 2	124.801	88.4789	106.64	0.475946	0.178609	0.00612033	0.0112226	50.0013	7.22708	44.9205	4.24565	Y	Y	2	yellow
UMAG_00663	KIS72250	probable ubiquitin-protein ligase	1103.42	788.605	946.013	0.475688	0.117564	4.19853e-05	0.000109674	291.197	25.247	263.216	20.7551	Y	Y	0.5	dark-green
UMAG_04860	KIS66801	hypothetical protein	162.806	115.842	139.324	0.475252	0.159243	0.00227053	0.00449651	74.2646	8.52878	66.7785	3.84993	Y	Y	2	yellow
UMAG_05230	KIS70159	salicylate hydroxylase	63.6807	44.9146	54.2977	0.474486	0.216561	0.0223824	0.0365023	32.2106	3.74875	28.6599	3.77439	Y	Y	4	magenta
UMAG_04722	KIS66661	related to Rpb4 - 16 kD subunit of DNA-directed RNA polymerase II	82.1348	58.22	70.1774	0.473873	0.188492	0.00948851	0.0167064	104.21	9.39157	93.6848	1.20769	Y	Y	0	pink
UMAG_03448	KIS68353	related to Ribonuclease Z / related to thiamin pyrophosphokinase 1	163.787	116.197	139.992	0.473202	0.175164	0.00552004	0.010203	46.3728	3.25797	41.8775	9.76056	N	Y	1	burlywood
UMAG_00295	KIS71867	GTP binding protein Cdc42	382.64	272.72	327.68	0.473179	0.155448	0.00187074	0.00376713	447.78	84.5182	402.362	16.9292	Y	Y	8	blue
UMAG_11241	KIS65724	related to aldehyde dehydrogenase [NAD(P)]	378.166	269.419	323.792	0.473093	0.159738	0.00244631	0.00482097	162.27	17.1968	145.817	19.2381	N	Y	1	dark-green
UMAG_04913	KIS67041	related to TRM10 - tRNA methyltransferase	53.6662	37.2959	45.4811	0.473018	0.274257	0.065252	0.0958236	27.9232	10.1324	24.3772	5.06272	N	Y	0	pink
UMAG_00036	KIS71593	hypothetical protein	365.356	258.913	312.135	0.472812	0.190056	0.0101931	0.0177967	365.564	25.595	328.597	94.8832	Y	Y	1	red
UMAG_00099	KIS71658	related to choline-phosphate cytidylyltransferase	197.129	139.92	168.525	0.47257	0.177642	0.00623317	0.0114101	64.616	3.0467	58.4337	14.0403	Y	Y	2	yellow
UMAG_11733	KIS68219	related to LSM2 - Sm-like (Lsm) protein	22.0732	15.0682	18.5707	0.47211	0.332671	0.117554	0.162473	50.9635	12.9289	44.1028	10.9406	Y	Y	0	yellow
UMAG_11866	KIS71360	probable U5 snRNP-specific 40 kD protein (novel WD-40 repeat protein)	72.6655	51.4817	62.0736	0.470896	0.210045	0.0197294	0.0324801	43.1424	4.9807	38.54	5.72143	Y	Y	0	salmon
UMAG_01711	KIS70543	related to Glucose dehydrogenase [acceptor] precursor	1345.85	963.407	1154.63	0.470596	0.134143	0.000364963	0.000820071	492.2	44.6643	447.057	66.6641	Y	Y	2	magenta
UMAG_11150	KIS67266	related to Uracil permease	3.5921	1.89824	2.74517	0.470144	0.648657	0.279506	0.343729	1.34837	0.557338	0.997688	0.435011	N	N	4	cyan
UMAG_11206	KIS66013	hypothetical protein	12.3199	7.87492	10.0974	0.469831	0.467844	0.220676	0.279468	7.84363	4.613	6.42202	1.23987	N	N	1	#N/A
UMAG_04361	KIS67258	related to KRI1 - KRRI-Interacting protein 1	183.886	129.226	156.556	0.469743	0.24408	0.0423975	0.0650102	55.6464	11.1777	48.9234	17.2644	Y	Y	2	green-yellow
UMAG_01991	KIS70844	hypothetical protein	728.829	509.408	619.118	0.469704	0.262559	0.0570345	0.0847969	177.632	31.3363	157.459	67.6077	Y	Y	0.5	red
UMAG_04848	KIS66786	probable THS1 - threonyl tRNA synthetase	784.339	560.632	672.486	0.469372	0.153678	0.00180978	0.00365577	231.411	20.7457	208.253	31.1555	Y	Y	0	yellow
UMAG_04802	KIS66739	probable COX4 - cytochrome-c oxidase chain IV	649.991	467.031	558.511	0.468757	0.115237	3.83449e-05	0.000100654	945.561	30.8519	859.116	26.6126	Y	Y	0	yellow
UMAG_10699	KIS66763	probable SRP1 - Importin alpha	833.619	598.264	715.942	0.468635	0.12406	0.00012811	0.000307997	341.289	38.913	310.424	15.0371	Y	Y	0	yellow
UMAG_06296	KIS70208	probable TFB2 - TFIIH subunit (transcription/repair factor)	205.306	146.831	176.068	0.468407	0.152345	0.0017003	0.00345298	93.5048	8.34198	84.8885	9.60822	Y	Y	8	cyan
UMAG_00539	KIS72120	related to MON2 - peripheral membrane protein with a role in endocytosis and vacuole integrity	365.306	259.651	312.478	0.467544	0.192881	0.0122373	0.0211075	44.8836	5.13206	40.686	11.1586	N	Y	4	magenta
UMAG_12179	KIS69511	hypothetical protein	51.3264	36.2437	43.785	0.467337	0.234781	0.0366368	0.0569887	129.538	18.8204	115.989	15.9906	Y	Y	2	magenta
UMAG_11273	KIS71157	probable PIM1 - ATP-dependent protease	1459.91	1040.29	1250.1	0.466791	0.183162	0.00861452	0.0153052	261.851	67.48	235.313	24.3502	Y	Y	0	yellow
UMAG_11720	KIS69383	related to cystathionine beta-lyase (N-terminal fragment)	2113.37	1505.62	1809.5	0.466393	0.187453	0.0102715	0.0179141	1028.23	187.98	921.089	185.715	Y	Y	0.5	dark-green
UMAG_02720	KIS69386	hypothetical protein	382.568	271.711	327.14	0.466331	0.206464	0.018961	0.0313749	263.197	47.07	235.003	55.9221	Y	Y	0.5	dark-green
UMAG_01406	KIS71511	related to ERG25 - C-4 methyl sterol oxidase	35.2036	24.3138	29.7587	0.465765	0.308177	0.100197	0.14062	20.833	8.29161	18.2075	3.64071	N	Y	0.5	red
UMAG_00429	KIS72007	probable TPS1 - alpha	621.58	442.822	532.201	0.465393	0.192923	0.0126324	0.0217325	226.605	21.5511	202.286	49.9807	Y	Y	0	green
UMAG_00886	KIS70969	hypothetical protein	58.0169	41.106	49.5615	0.465238	0.216908	0.0254117	0.040856	18.2839	0.748107	16.4488	2.80407	N	N	0.5	dark-green
UMAG_11513	KIS67833	hypothetical protein	2.56657	1.19579	1.88118	0.464842	0.716324	0.280829	0.344962	1.31562	0.704502	0.983087	0.429725	N	N	1	red
UMAG_11636	KIS68033	related to vacuolar protein sorting 16	271.362	193.713	232.538	0.464383	0.180578	0.00812756	0.0145441	60.7965	12.3574	55.1759	10.0484	N	Y	0	beige
UMAG_11941	KIS69033	related to VPS36 protein	143.761	102.67	123.215	0.464158	0.173677	0.00607219	0.0111375	45.2858	2.43996	41.0682	9.2712	Y	Y	0	beige
UMAG_05197	KIS70125	hypothetical protein	196.857	140.638	168.747	0.463968	0.177683	0.0072529	0.0130876	100.743	5.41372	91.7616	20.8545	Y	Y	8	cyan
UMAG_03853	KIS68272	related to NUP170 - nuclear pore protein	494.288	354.436	424.362	0.463636	0.158156	0.0027247	0.00532252	80.6804	14.3259	73.3817	8.06555	Y	Y	0	yellow
UMAG_05569	KIS66581	related to methylated-dna--protein-cysteine methyltransferase	17.9562	12.1194	15.0378	0.463526	0.370999	0.158052	0.20901	23.2443	8.06046	20.371	5.90839	Y	Y	0.5	red
UMAG_04705	KIS66643	related to ARG2 - acetylglutamate synthase	280.27	200.631	240.45	0.46327	0.167755	0.004636	0.00867823	72.1434	11.2185	65.7669	11.6899	Y	Y	0.5	burlywood
UMAG_10144	KIS69883	related to Sulfite oxidase	103.205	73.8472	88.526	0.462467	0.174309	0.00643562	0.0117574	52.5508	3.56043	47.7278	5.75768	Y	Y	0	beige
UMAG_05525	KIS66531	related to MRPL16 - mitochondrial ribosomal protein	133.496	95.7942	114.645	0.461605	0.165131	0.0041914	0.00791246	125.333	16.0397	113.629	5.06585	Y	Y	0	yellow
UMAG_11533	KIS67527	probable RPL33B - ribosomal protein L35a.e.c15	182.672	130.079	156.376	0.461532	0.209318	0.0218867	0.0357402	388.894	80.924	351.012	72.3414	Y	Y	0	yellow
UMAG_05145	KIS70070	hypothetical protein	58.5518	41.5592	50.0555	0.461369	0.220089	0.0287369	0.0457129	27.5206	4.27599	24.9933	3.9482	N	Y	8	salmon
UMAG_04712	KIS66651	related to N-methyltransferase	96.9755	69.109	83.0422	0.460755	0.206632	0.0205955	0.0337716	61.2801	11.5678	55.3671	8.64042	Y	Y	8	salmon
UMAG_04159	KIS67655	probable RKI1 - D-ribose-5-phosphate ketol-isomerase	410.05	295.554	352.802	0.459813	0.141964	0.000975594	0.00206026	319.997	41.0536	292.198	23.3781	Y	Y	2	yellow
UMAG_11259	KIS70938	probable RPL42B - ribosomal protein L36a.e	322.734	230.678	276.706	0.459619	0.196183	0.0153328	0.0258683	673.526	136.467	610.721	115.405	Y	Y	0	yellow
UMAG_01974	KIS70826	hypothetical protein	468.118	337.451	402.785	0.458008	0.148648	0.00167693	0.00340873	103.409	11.2314	94.4864	15.2081	Y	Y	0	yellow
UMAG_04166	KIS67662	related to SHE9 - mitochondrial inner membrane protein	127.902	91.3457	109.624	0.457203	0.204343	0.0202768	0.0332795	57.3506	11.6827	52.0316	11.3308	Y	Y	0	yellow
UMAG_11944	KIS69117	probable GCY1 - galactose-induced protein of aldo/keto reductase family	58.2872	41.3058	49.7965	0.456223	0.252449	0.0558301	0.0832361	40.0081	9.3903	35.813	7.83731	Y	Y	4	magenta
UMAG_03152	KIS68580	hypothetical protein	252.06	182.34	217.2	0.455556	0.140674	0.000980902	0.00206877	159.254	9.96668	146.033	7.13419	Y	Y	0.5	light-cyan
UMAG_05033	KIS67166	related to glucose/galactose transporter	12.575	8.35041	10.4627	0.455471	0.421917	0.205304	0.262159	5.9679	1.12094	4.95579	2.47013	N	N	0.5	light-cyan
UMAG_03520	KIS68431	hypothetical protein	142.469	102.45	122.46	0.455351	0.174631	0.00740137	0.0133369	33.1365	5.66747	30.2664	3.57835	N	N	0	yellow
UMAG_10799	KIS70334	related to VPS24 - endosomal Vps protein complex subunit	78.024	55.7837	66.9039	0.455089	0.204244	0.020842	0.034129	78.168	10.5075	71.1925	12.4051	Y	Y	0	beige
UMAG_10951	KIS69486	hypothetical protein	9.49495	6.18733	7.84114	0.455034	0.452931	0.226806	0.286333	8.08837	1.2123	6.95654	2.78268	N	Y	6	#N/A
UMAG_10227	KIS71377	related to mitochondrial ribosomal protein S13	177.122	127.667	152.394	0.454925	0.163546	0.00440177	0.00827091	204.479	20.5403	186.942	26.1169	Y	Y	0	yellow
UMAG_10157	KIS69930	probable adenylosuccinate lyase	539.844	390.737	465.29	0.454664	0.134101	0.000557856	0.00121748	250.374	9.83868	228.918	22.2414	Y	Y	0	yellow
UMAG_10627	KIS69130	related to triose-phosphate isomerase	65.7445	46.7623	56.2534	0.453735	0.234704	0.0424188	0.0650273	52.2293	7.56078	47.464	13.2982	Y	Y	1	light-cyan
UMAG_04855	KIS66796	probable 60S ribosomal protein L26	366.097	262.904	314.5	0.453421	0.194246	0.015797	0.0266098	629.564	122.629	573.503	116.254	Y	Y	0	yellow
UMAG_05102	KIS70028	hypothetical protein	76.1975	54.5095	65.3535	0.452643	0.216478	0.0293349	0.0465953	236.237	46.5852	214.976	25.9685	Y	Y	0	yellow
UMAG_01428	KIS71534	hypothetical protein	49.5194	35.3163	42.4178	0.451384	0.244073	0.0512499	0.0769583	29.9829	5.39746	27.1469	3.14955	Y	Y	0	burlywood
UMAG_12264	KIS67285	hypothetical protein	23.608	16.5354	20.0717	0.450296	0.309273	0.113153	0.15686	35.1306	5.36029	31.6895	3.61921	Y	Y	2	magenta
UMAG_03783	KIS68204	hypothetical protein	229.245	166.179	197.712	0.449903	0.145718	0.00165864	0.00337474	68.435	4.40231	63.0534	9.09616	Y	Y	4	magenta
UMAG_12190	KIS69927	hypothetical protein	147.104	106.54	126.822	0.449809	0.158442	0.00370389	0.00704153	153.788	7.81615	141.335	13.4633	N	N	0	burlywood
UMAG_01728	KIS70560	related to MXR2 - Methionine-R-sulfoxide reductase	204.072	147.705	175.888	0.449285	0.16481	0.00523488	0.00970647	204.687	22.2686	188.218	27.8076	Y	Y	4	beige
UMAG_11583	KIS66993	related to NADH2 dehydrogenase (ubiquinone) complex I 13K-A chain precursor	264.357	192.067	228.212	0.449033	0.139117	0.00102534	0.00215335	365.567	22.7173	336.419	29.5098	Y	Y	0	yellow
UMAG_02375	KIS69857	probable karyopherin beta-1 subunit (importin 95)	992.716	723.747	858.231	0.448833	0.108433	2.88058e-05	7.72779e-05	253.193	14.3963	233.376	10.9831	Y	Y	2	green-yellow
UMAG_01794	KIS70629	related to adenosine deaminase	50.8302	36.4593	43.6448	0.447193	0.228872	0.0407433	0.0627567	19.9152	1.61671	17.9475	2.57031	N	Y	0	beige
UMAG_05076	KIS70004	related to 3-carboxy-cis	312.934	227.747	270.341	0.446742	0.141104	0.00126906	0.00262507	141.933	11.8842	130.591	11.0867	Y	Y	8	light-cyan
UMAG_11624	KIS72339	related to SSS1 - ER protein-translocase complex subunit	28.7233	19.8312	24.2773	0.44647	0.354555	0.158867	0.209788	90.3019	41.7144	79.2033	12.6281	Y	Y	2	light-green
UMAG_02962	KIS68983	related to OSH6 - member of an oxysterol-binding protein family	365.818	266.485	316.151	0.445601	0.133261	0.000682573	0.00147128	137.4	10.7831	127.192	16.1536	Y	Y	0.5	dark-green
UMAG_10785	KIS70246	related to RPC34 - DNA-directed RNA polymerase III	177.182	128.433	152.807	0.445223	0.175198	0.00902519	0.0159515	73.4505	10.4481	67.1119	9.84871	Y	Y	2	green-yellow
UMAG_04922	KIS67049	related to 2	1712.56	1250.76	1481.66	0.444714	0.116805	0.000115005	0.000279089	1188.77	87.2143	1096.31	71.5856	Y	Y	2	yellow
UMAG_10629	KIS69132	hypothetical protein	346.624	252.335	299.479	0.444475	0.146273	0.00195844	0.00392417	245.904	21.151	227.105	35.3066	Y	Y	2	light-green
UMAG_05506	KIS66513	related to YMD8 - putative nucleotide sugar transporter	209.718	151.539	180.628	0.444088	0.193186	0.0175348	0.0292927	74.7309	6.54859	68.9767	18.8589	Y	Y	4	magenta
UMAG_04193	KIS67692	related to ABP140 - actin binding protein and AdoMet-dependent tRNA methyltransferase	127.046	91.8768	109.462	0.44382	0.193696	0.0178711	0.0297936	43.8118	9.49137	40.1681	2.34277	Y	Y	0.5	red
UMAG_04522	KIS67423	related to JHD1 - JmjC domain family histone demethylase	53.9187	38.7054	46.3121	0.443629	0.22863	0.0422215	0.0647556	18.0799	3.01051	16.3843	2.31227	N	Y	8	magenta
UMAG_11749	KIS67215	probable TIF34 - translation initiation factor eIF3	481.51	350.76	416.135	0.44309	0.15363	0.00324019	0.0062278	309.738	13.0734	284.883	44.5312	Y	Y	0	yellow
UMAG_04881	KIS66820	related to mRNA guanylyltransferase	63.3685	45.2569	54.3127	0.442883	0.257894	0.0685563	0.100062	30.6882	6.47673	27.9079	8.07577	Y	Y	0	pink
UMAG_15022	KIS66926	related to pre-mrna splicing factor srp55	126.105	91.5743	108.84	0.442854	0.17559	0.00954381	0.0167962	107.295	17.7363	98.335	4.11418	Y	Y	0	yellow
UMAG_03178	KIS68608	hypothetical protein	25.3832	17.6607	21.522	0.442624	0.340984	0.150074	0.200098	28.6509	12.3842	25.2929	4.66535	Y	Y	8	cyan
UMAG_03442	KIS68346	related to ubiquitin-protein ligase 1	199.454	145.476	172.465	0.441968	0.149709	0.0026023	0.00510348	78.1223	7.03698	72.0751	3.43404	Y	Y	0	burlywood
UMAG_02283	KIS69761	hypothetical protein	44.6796	31.8878	38.2837	0.44181	0.264786	0.0758555	0.109699	20.2672	4.6704	18.234	3.99378	N	Y	8	magenta
UMAG_01381	KIS71486	hypothetical protein	284.473	207.342	245.907	0.441343	0.151899	0.00302689	0.00586319	103.455	10.4453	95.7706	15.777	Y	Y	0	pink
UMAG_00179	KIS71744	hypothetical protein	139.361	101.503	120.432	0.441284	0.166985	0.00675738	0.0122827	65.3561	5.73868	60.105	4.42122	Y	Y	0.5	red
UMAG_00306	KIS71878	hypothetical protein	1.28733	0	0.643664	0.440847	0.936522	0.16462	0.216518	1.79086	2.25648	0.349906	0.406451	N	N	0.5	#N/A
UMAG_04630	KIS67531	related to MUS81 - endonuclease involved in DNA repair and replication fork stability	155.85	113.606	134.728	0.44054	0.156581	0.00404495	0.00765614	57.6418	5.4284	53.1869	4.81097	Y	Y	4	magenta
UMAG_00203	KIS71768	hypothetical protein	49.2812	35.2448	42.263	0.439992	0.251873	0.0647839	0.0952227	27.9419	7.00685	25.4248	5.40133	N	Y	0	burlywood
UMAG_10925	KIS72202	related to SGF73 - SAGA complex subunit	151.197	109.496	130.347	0.439844	0.200541	0.0230598	0.0374363	89.9608	18.7733	82.4493	16.8096	Y	Y	0	burlywood
UMAG_10696	KIS66760	related to AHA1 - stress-regulated cochaperone	896.235	635.432	765.834	0.439839	0.291811	0.103676	0.145062	623.644	116.318	549.999	251.871	Y	Y	2	yellow
UMAG_03627	KIS68540	probable SCO1 - involved in stabilization of Cox1p and Cox2p	225.913	164.603	195.258	0.439347	0.166756	0.00693117	0.0125703	167.558	30.331	154.621	9.76555	Y	Y	0	yellow
UMAG_01663	KIS70490	hypothetical protein	62.8698	44.3811	53.6254	0.439342	0.297936	0.110742	0.153837	16.9144	4.62364	15.3175	8.10961	N	N	1	light-cyan
UMAG_10398	KIS68617	hypothetical protein	102.138	74.265	88.2015	0.439289	0.184082	0.0139489	0.0237632	74.6158	7.65542	68.9046	7.94823	Y	Y	0	burlywood
UMAG_05936	KIS66201	hypothetical protein	34.3939	24.5452	29.4695	0.438163	0.265452	0.0791649	0.113772	23.6261	2.60317	21.585	4.11572	Y	Y	12	beige
UMAG_00180	KIS71745	hypothetical protein	68.4984	49.509	59.0037	0.437906	0.219379	0.0373204	0.0579683	30.4856	5.94587	28.0835	3.28853	Y	Y	4	cyan
UMAG_05143	KIS70068	probable nucleosome assembly protein I	1828.8	1344.36	1586.58	0.437209	0.105665	2.92402e-05	7.83782e-05	990.546	70.3192	921.383	59.7181	Y	Y	0	yellow
UMAG_01341	KIS71443	probable iron inhibited ABC transporter 2	1312.56	964.437	1138.5	0.436978	0.112148	8.12866e-05	0.000204006	467.158	36.5188	433.807	21.434	Y	Y	0	yellow
UMAG_04658	KIS67563	related to WD40 protein Ciao1	287.446	210.552	248.999	0.435928	0.141991	0.00177753	0.00359625	141.185	9.29094	131.618	19.4685	Y	Y	0	burlywood
UMAG_05695	KIS66911	probable SUP35 - eukaryotic peptide chain release factor GTP-binding subunit	989.548	724.876	857.212	0.435687	0.148282	0.00273625	0.00533862	293.722	38.8709	271.351	32.5088	Y	Y	2	green-yellow
UMAG_11367	KIS70572	hypothetical protein	119.853	87.3367	103.595	0.435259	0.180008	0.0128675	0.0220957	71.3003	8.27045	66.0088	10.7792	Y	Y	0	pink
UMAG_02136	KIS69601	effector family protein Eff1-6	1.54	0.245542	0.892769	0.434965	0.880932	0.178027	0.231666	0.687602	0.925673	0.230927	0.192636	N	N	2	magenta
UMAG_11778	KIS70006	hypothetical protein	6.41884	4.03018	5.22451	0.433844	0.526061	0.286755	0.351306	3.20187	0.696851	2.48584	1.45562	N	N	8	light-cyan
UMAG_03605	KIS68517	related to Sucrose-6-phosphate hydrolase	46.4708	33.4343	39.9525	0.432988	0.252482	0.06973	0.101545	15.2746	2.53628	13.9386	3.56586	N	N	0	yellow
UMAG_10956	KIS71815	probable RPP1A - 60S large subunit acidic ribosomal protein a1	632.311	463.02	547.666	0.432645	0.164964	0.00721903	0.0130374	1287.31	216.542	1195.39	169.26	Y	Y	0	yellow
UMAG_04474	KIS67372	Guanine nucleotide-binding protein alpha-3 subunit	73.9376	53.7608	63.8492	0.432364	0.206154	0.0294988	0.0468211	46.8745	3.54571	43.0936	8.7102	Y	Y	0	burlywood
UMAG_05465	KIS66471	probable cytochrome-c oxidase chain V precursor	565.228	416.16	490.694	0.431182	0.133283	0.00101465	0.00213229	676.524	64.691	630.132	36.8389	Y	Y	0	yellow
UMAG_02403	KIS69887	related to tRNA splicing endonuclease beta subunit	167.663	122.415	145.039	0.431034	0.190257	0.019338	0.0319171	71.1332	7.72986	65.8043	15.2213	Y	Y	0	pink
UMAG_03467	KIS68373	related to RSM7 - mitochondrial ribosomal protein	370.294	271.237	320.765	0.430782	0.175863	0.0118009	0.0203834	276.287	38.4007	255.173	38.9675	Y	Y	0	yellow
UMAG_02218	KIS69687	related to cysteine synthase	191.503	140.548	166.026	0.430269	0.159498	0.00580728	0.0106819	79.6325	9.39223	74.3786	9.48021	Y	Y	2	yellow
UMAG_01763	KIS70598	hypothetical protein	146.085	107.312	126.698	0.429843	0.153902	0.00435373	0.00818303	43.8685	2.34142	40.7276	4.61788	N	Y	0	beige
UMAG_11147	KIS67257	hypothetical protein	193.007	138.711	165.859	0.429201	0.272235	0.0921598	0.13036	42.8649	7.8995	39.0394	17.337	N	N	2	magenta
UMAG_11442	KIS72116	related to UGO1 - outer membrane component of the mitochondrial fusion machinery	209.706	153.179	181.443	0.429106	0.190858	0.0202648	0.0332683	74.6054	3.17847	69.5694	20.4643	Y	Y	8	beige
UMAG_02718	KIS69384	related to PIF1 - DNA helicase involved in mitochondrial DNA repair and telomere length control	145.27	106.81	126.04	0.42775	0.158402	0.00577727	0.0106328	46.0615	3.86627	43.0509	4.47124	Y	Y	0	pink
UMAG_03603	KIS68515	hypothetical protein	443.285	323.831	383.558	0.427472	0.200144	0.026914	0.0430891	68.0096	13.8518	63.4735	18.9818	N	Y	0	burlywood
UMAG_10902	KIS67465	related to Y14	75.9574	55.2793	65.6183	0.427454	0.215706	0.0390237	0.0603527	106.32	16.9622	98.5341	20.4087	Y	Y	0	pink
UMAG_05923	KIS66187	probable 2-deoxy-D-gluconate 3-dehydrogenase	39.5224	28.4837	34.003	0.427266	0.267071	0.0884718	0.125693	31.6997	4.84724	28.9635	7.52134	Y	Y	0.5	light-cyan
UMAG_00703	KIS72295	G-protein beta subunit Bpp1	453.468	334.186	393.827	0.427229	0.149072	0.00346876	0.00663356	290.741	32.4478	270.446	37.0463	Y	Y	8	magenta
UMAG_10228	KIS71388	hypothetical protein	1.28149	0.226975	0.754234	0.427221	0.863552	0.207611	0.264582	0.280907	0.189716	0.0596578	0.119316	N	N	12	cyan
UMAG_12150	KIS71895	related to magnesium-dependent acid phosphatase	115.509	84.6478	100.079	0.426789	0.186556	0.0183413	0.0305294	109.882	19.4179	101.842	12.5809	Y	Y	0	pink
UMAG_04365	KIS67262	related to SRM1 û nucleotide exchange factor	46.7102	33.8897	40.2999	0.426402	0.235723	0.0575852	0.0855174	19.1292	2.17513	17.6306	2.63029	N	Y	0	yellow
UMAG_03572	KIS68486	hypothetical protein	30.2881	21.6953	25.9917	0.426055	0.286413	0.109914	0.15283	12.8558	2.86165	11.9017	2.47996	N	Y	0	pink
UMAG_03774	KIS68195	probable positive effector protein GCN20	268.563	198.369	233.466	0.425766	0.137623	0.00164757	0.00335539	78.1585	6.98284	73.0504	4.23407	Y	Y	2	yellow
UMAG_05040	KIS67173	probable 40S ribosomal protein S7	420.201	309.022	364.612	0.425519	0.170669	0.010525	0.0183117	480.164	31.3591	447.022	95.9107	Y	Y	0	yellow
UMAG_06169	KIS65789	related to CGI121 - component of the EKC/KEOPS complex	63.4088	46.2154	54.8121	0.425238	0.224613	0.0477904	0.0722373	56.0768	11.971	51.8069	2.53704	Y	Y	0	yellow
UMAG_02811	KIS69480	related to 2	101.906	73.8633	87.8847	0.42457	0.250007	0.0726945	0.105435	57.7344	18.6884	53.4211	13.998	Y	Y	2	yellow
UMAG_11029	KIS66136	related to RSM10 - mitochondrial ribosomal protein	240.783	177.573	209.178	0.424273	0.161502	0.00718008	0.012978	192.134	23.8982	179.062	24.3685	Y	Y	0	yellow
UMAG_11512	KIS67829	hypothetical protein	24.8922	17.7304	21.3113	0.424055	0.318279	0.14498	0.194431	17.6328	4.54942	15.8206	3.39973	N	Y	1	red
UMAG_15062	KIS67629	hypothetical protein	104.445	76.6989	90.572	0.423836	0.185365	0.0184621	0.0306813	30.2822	3.37932	28.3046	4.44253	N	Y	12	cyan
UMAG_11721	KIS69392	hypothetical protein	163.203	119.705	141.454	0.422754	0.19819	0.027242	0.0435171	50.7931	5.73149	47.3181	11.646	Y	Y	0.5	light-cyan
UMAG_04880	KIS66819	probable APG7 - component of the autophagic system	153.282	112.532	132.907	0.421618	0.194009	0.0247092	0.0398456	45.2611	5.23653	42.2617	10.7254	Y	Y	0.5	light-cyan
UMAG_06086	KIS65996	related to branched-chain alpha-ketoacid dehydrogenase kinase	175.148	128.669	151.909	0.421337	0.190846	0.0226499	0.0368467	79.6897	12.1914	74.5	17.9401	Y	Y	0	salmon
UMAG_01692	KIS70521	related to CHA1 - L-serine/L-threonine deaminase	52.6432	38.403	45.5231	0.421105	0.238874	0.0637611	0.0938261	30.3908	7.44673	27.9252	1.91194	Y	Y	0	pink
UMAG_11545	KIS67549	hypothetical protein	53.3745	38.9844	46.1795	0.420918	0.228146	0.0534893	0.0800234	59.4179	7.34428	54.9984	8.06793	Y	Y	12	beige
UMAG_11405	KIS69766	related to anaphase promoting complex subunit 11	34.1235	24.4698	29.2966	0.420792	0.305678	0.134709	0.182436	75.7741	23.4098	68.1431	20.7221	Y	Y	0.5	beige
UMAG_01214	KIS71314	hypothetical protein	3.84718	2.17572	3.01145	0.420787	0.637025	0.324446	0.390593	4.76658	2.69379	3.24047	1.62299	N	N	6	#N/A
UMAG_01988	KIS70840	related to Oxidoreductase	52.8801	38.3561	45.6181	0.420775	0.253184	0.0787442	0.113394	24.8384	5.63981	22.9883	6.17887	N	Y	0.5	dark-green
UMAG_03169	KIS68598	probable CAR2 - ornithine aminotransferase	1291.83	887.476	1089.65	0.420692	0.410273	0.230414	0.290377	624.707	81.0282	550.929	266.13	Y	Y	0	burlywood
UMAG_11689	KIS70419	related to SOF1 - involved in 18S pre-rRNA production	190.212	140.668	165.44	0.420631	0.159043	0.0068443	0.0124302	84.5198	2.74408	78.929	10.7249	Y	Y	4	green-yellow
UMAG_04074	KIS68034	hypothetical protein	121.46	89.3491	105.404	0.420276	0.189821	0.0223095	0.0364122	53.397	7.6377	49.8107	9.93838	Y	Y	0	beige
UMAG_01307	KIS71409	hypothetical protein	81.8992	60.3194	71.1093	0.419491	0.198642	0.0287692	0.045753	43.6387	4.43932	40.5743	5.14573	Y	Y	0	yellow
UMAG_02402	KIS69886	hypothetical protein	92.7013	68.3301	80.5157	0.418982	0.190129	0.0229146	0.0372211	122.217	19.6268	113.599	7.48975	Y	Y	0	pink
UMAG_10069	KIS69656	hypothetical protein	102.178	75.18	88.6791	0.41895	0.192263	0.0244139	0.039399	31.7506	3.661	29.6195	6.09959	N	Y	0	beige
UMAG_01658	KIS70484	related to protein that forms a complex with Thp3p	82.6551	60.7648	71.71	0.417938	0.197255	0.0284057	0.0452307	40.9136	4.09617	38.4155	7.56631	Y	Y	0	burlywood
UMAG_10965	KIS71839	hypothetical protein	165.59	122.578	144.084	0.417621	0.156894	0.006542	0.0119248	68.2358	4.22912	64.285	10.8448	N	Y	0.5	light-cyan
UMAG_06368	KIS65665	probable small subunit of ribonucleotide reductase	232.379	172.115	202.247	0.417007	0.163157	0.00886186	0.0156972	122.413	22.688	115.063	8.1302	Y	Y	0	yellow
UMAG_01332	KIS71433	related to coenzyme A diphosphatase	20.7991	14.7981	17.7986	0.416683	0.332372	0.166849	0.219207	12.7868	3.45468	11.5996	2.07974	N	Y	0	burlywood
UMAG_00982	KIS71071	probable Ubiquitin conjugating enzyme E2-16 kDa	801.906	591.437	696.672	0.416621	0.193242	0.0257993	0.0414689	1211.84	265.959	1127.99	164.013	Y	Y	0	yellow
UMAG_11535	KIS67534	probable 40S ribosomal protein S15	1104.46	821.973	963.215	0.416548	0.127254	0.000899673	0.00190554	1637.91	118.157	1545.35	172.539	Y	Y	0	yellow
UMAG_11426	KIS71800	related to GTR1 - GTP-binding protein	254.963	188.897	221.93	0.416453	0.166421	0.0103335	0.0180174	143.803	23.9005	134.833	13.0228	Y	Y	0	yellow
UMAG_00130	KIS71690	related to lysophospholipase	203.828	150.782	177.305	0.416335	0.175651	0.014876	0.0251633	189.523	16.2134	177.596	37.8313	Y	Y	0	yellow
UMAG_01615	KIS70439	hypothetical protein	214.115	158.762	186.438	0.416181	0.158425	0.0072398	0.0130713	84.3397	12.8302	79.1244	9.05003	Y	Y	0.5	dark-green
UMAG_06033	KIS65945	related to LRP16 protein	64.929	47.757	56.343	0.41613	0.217302	0.0459221	0.0697852	65.7123	6.58753	61.5096	10.6727	Y	Y	12	beige
UMAG_05965	KIS66228	hypothetical protein	132.482	98.31	115.396	0.414592	0.167104	0.0109993	0.0190907	192.974	16.9417	180.865	19.1645	Y	Y	0.5	dark-green
UMAG_04701	KIS66639	probable rcd1 protein involved in sexual development	158.1	117.279	137.689	0.413976	0.164779	0.0100952	0.0176543	82.5668	10.6255	77.7114	8.96867	Y	Y	0	yellow
UMAG_01010	KIS71099	hypothetical protein	234.099	173.489	203.794	0.413556	0.182599	0.019662	0.0323857	116.789	10.6827	108.961	20.8615	Y	Y	0	yellow
UMAG_06302	KIS70214	hypothetical protein	118.386	86.0124	102.199	0.413487	0.276479	0.109417	0.152237	54.9941	8.14467	50.3585	23.0799	Y	Y	8	cyan
UMAG_01947	KIS70796	related to cytochrome-c peroxidase precursor	414.842	306.754	360.798	0.413472	0.194922	0.0282322	0.0449876	280.888	6.18898	260.503	64.3329	Y	Y	4	light-green
UMAG_10826	KIS68709	hypothetical protein	94.7099	69.6333	82.1716	0.413378	0.223174	0.0529577	0.0793199	123.543	38.5502	115.252	8.68609	Y	Y	0.5	burlywood
UMAG_10808	KIS70367	hypothetical protein	174.284	129.652	151.968	0.412993	0.156043	0.00685373	0.0124438	289.26	32.7085	271.652	18.8623	Y	Y	4	magenta
UMAG_11328	KIS71506	hypothetical protein	191.207	141.885	166.546	0.412839	0.174088	0.0148706	0.0251633	162.538	23.3903	152.881	21.73	Y	Y	0.5	light-cyan
UMAG_02750	KIS69419	related to quinic acid utilisation protein QUTG (inositol-1(or 4)-monophosphatase)	380.424	282.831	331.628	0.412499	0.161235	0.00885466	0.0156887	256.897	50.2267	241.721	11.7875	Y	Y	0	yellow
UMAG_02107	KIS69571	hypothetical protein	138.651	102.683	120.667	0.41185	0.189058	0.0245909	0.0396647	100.165	8.78158	94.0486	22.2417	Y	Y	1	dark-green
UMAG_04133	KIS67630	related to NAD(P)H-dependent oxidoreductase	10.789	7.38607	9.08755	0.411823	0.428834	0.256871	0.318785	8.15211	2.90913	7.13258	1.90483	N	Y	0.5	red
UMAG_11959	KIS68503	hypothetical protein	32.8495	23.9816	28.4156	0.411467	0.266821	0.10065	0.141133	46.3947	6.39883	42.8719	1.3548	Y	Y	8	cyan
UMAG_02059	KIS69520	related to RPC31 - DNA-directed RNA polymerase III	45.4352	33.0327	39.234	0.41109	0.269548	0.104082	0.145534	49.1967	11.2083	45.5489	14.4804	Y	Y	0	yellow
UMAG_10373	KIS69094	probable RIB4 - 6	649.085	483.857	566.471	0.41048	0.134	0.00173395	0.00351689	688.328	80.5301	650.627	40.5444	Y	Y	0	burlywood
UMAG_01273	KIS71373	related to ubiquitin carboxyl-terminal hydrolase 36	79.0883	58.5598	68.824	0.410423	0.202388	0.0355235	0.0554572	23.4043	2.25208	21.9022	3.3299	N	Y	8	cyan
UMAG_00965	KIS71050	related to carotenoid cleavage dioxygenase 1	62.4239	45.6219	54.0229	0.410064	0.264472	0.0989151	0.139093	17.8136	4.33634	16.2952	5.08043	N	N	1	red
UMAG_00074	KIS71633	related to NOP16 û nucleolar protein involved in 60S ribosomal subunit biogenesis	125.515	93.2755	109.395	0.409827	0.185009	0.0224209	0.0365455	124.039	16.7898	116.108	13.6041	Y	Y	1	green-yellow
UMAG_04043	KIS68001	hypothetical protein	42.3466	30.6665	36.5066	0.409204	0.291082	0.12985	0.176558	27.2469	9.14184	25.2835	6.88162	Y	Y	0	beige
UMAG_00924	KIS71006	probable translation elongation factor eEF-1 alpha chain	30639.5	22954.2	26796.8	0.408936	0.128683	0.00133283	0.00275258	14932.4	2007.29	14145.9	1027.89	Y	Y	0	yellow
UMAG_05429	KIS66435	related to Cleavage and polyadenylation specificity factor	98.0589	72.5044	85.2816	0.408664	0.216011	0.0486619	0.073379	59.9809	15.1442	55.9075	7.48288	Y	Y	0	pink
UMAG_11343	KIS71914	hypothetical protein	21.0474	15.0347	18.0411	0.408363	0.339911	0.183181	0.237287	25.9749	7.86555	23.7341	5.37069	Y	Y	1	green
UMAG_10344	KIS69014	hypothetical protein	147.322	109.486	128.404	0.408347	0.181343	0.0204743	0.0335952	72.429	13.1323	68.2316	9.39305	Y	Y	4	salmon
UMAG_05872	KIS66132	hypothetical protein	115.299	85.4492	100.374	0.407955	0.19644	0.0316852	0.0499722	60.8287	7.00293	57.2371	13.9071	Y	Y	4	cyan
UMAG_02868	KIS68881	probable ribosomal elongation factor EF-2	268.012	200.116	234.064	0.407748	0.151172	0.00592789	0.0108852	60.3016	7.24162	57.0297	7.30418	Y	Y	0	yellow
UMAG_01478	KIS70307	probable QCR2 - 40 kDa ubiquinol cytochrome-c reductase core protein 2	1291.07	969.001	1130.04	0.407015	0.111179	0.000214596	0.000497591	648.683	28.9319	615.563	35.8194	Y	Y	0	yellow
UMAG_11608	KIS71971	hypothetical protein	11.5381	7.9038	9.72093	0.406954	0.441823	0.271165	0.33449	7.19867	2.91879	6.20231	2.3555	N	N	4	#N/A
UMAG_11304	KIS71299	hypothetical protein	202.845	151.483	177.164	0.406798	0.162062	0.0101994	0.017798	82.9294	9.86829	78.118	8.09559	Y	Y	0	yellow
UMAG_06053	KIS65964	related to TAP42 - component of the Tor signaling pathway	136.083	101.647	118.865	0.40494	0.168879	0.0139464	0.0237632	71.8501	8.08373	67.7684	6.7596	Y	Y	8	cyan
UMAG_02360	KIS69838	hypothetical protein	271.566	203.716	237.641	0.404458	0.138965	0.00307135	0.00594137	457.71	17.1647	434.032	38.9702	Y	Y	0	yellow
UMAG_03724	KIS68142	related to LHP1 - RNA binding protein	341.212	255.262	298.237	0.404157	0.160803	0.0101191	0.0176914	169.357	14.4592	159.549	25.8006	Y	Y	0	yellow
UMAG_10531	KIS67347	hypothetical protein	174.821	128.933	151.877	0.403686	0.240786	0.0776248	0.111957	85.773	33.0677	79.9334	14.4825	Y	Y	4	cyan
UMAG_03459	KIS68365	related to dynein light-intermediate chain	290.915	218.107	254.511	0.403594	0.145618	0.00474581	0.00887606	87.3522	8.53509	82.8238	10.2077	Y	Y	2	light-green
UMAG_05891	KIS66153	hypothetical protein	103.915	77.5129	90.7138	0.402863	0.191065	0.0294583	0.0467684	68.7763	10.9439	64.9022	4.59471	Y	Y	6	cyan
[truncated: 4,462 more rows]
