# Supplementary material for: mRNA inventory of extracellular vesicles from Ustilago maydis
Source: Preprints.org preprint supplement (doi:10.20944/preprints202106.0257.v1), 2021-06-09
Supplement: Supplementary file 3 [file Table_S2_Overrepresented_GO_terms.xlsx]

## Sheet: Enriched
Table S2A. Overrepresented GO terms among transcripts enriched in EVs.
GO term class	Enrichement in EVs	Cluster name	GO term ID	GO term name	adjusted p-value	GO term size	query_size	Number of hits	Gene ID
GO:BP	Enriched	organophosphate & sulfur compound metabolism	GO:0055086	nucleobase-containing small molecule metabolic process	3.96769e-09	186	635	48	UMAG_10864,UMAG_04262,UMAG_05584,UMAG_11945,UMAG_05362,UMAG_05339,UMAG_05627,UMAG_01903,UMAG_01904,UMAG_03318,UMAG_10904,UMAG_04871,UMAG_03299,UMAG_02849,UMAG_11638,UMAG_04214,UMAG_03854,UMAG_10041,UMAG_05924,UMAG_01783,UMAG_06167,UMAG_05531,UMAG_11125,UMAG_01103,UMAG_03504,UMAG_11353,UMAG_00637,UMAG_00334,UMAG_06004,UMAG_00672,UMAG_04726,UMAG_00797,UMAG_11497,UMAG_06105,UMAG_04539,UMAG_11421,UMA…
GO:BP	Enriched	organophosphate & sulfur compound metabolism	GO:0019637	organophosphate metabolic process	5.21087e-07	283	685	61	UMAG_10465,UMAG_04262,UMAG_11945,UMAG_05362,UMAG_05339,UMAG_04930,UMAG_02017,UMAG_05627,UMAG_01903,UMAG_01904,UMAG_03318,UMAG_03083,UMAG_10904,UMAG_04871,UMAG_00816,UMAG_04797,UMAG_03299,UMAG_02849,UMAG_04138,UMAG_02614,UMAG_04214,UMAG_03854,UMAG_05924,UMAG_05549,UMAG_00095,UMAG_11125,UMAG_01103,UMAG_11353,UMAG_00637,UMAG_00334,UMAG_06004,UMAG_04726,UMAG_00797,UMAG_03278,UMAG_10131,UMAG_06105,UMA…
GO:BP	Enriched	organophosphate & sulfur compound metabolism	GO:0072521	purine-containing compound metabolic process	4.75445e-06	107	635	30	UMAG_11945,UMAG_05362,UMAG_05339,UMAG_05627,UMAG_01903,UMAG_01904,UMAG_10904,UMAG_04871,UMAG_03299,UMAG_02849,UMAG_03854,UMAG_05924,UMAG_01783,UMAG_05531,UMAG_11125,UMAG_01103,UMAG_11353,UMAG_00334,UMAG_00672,UMAG_04726,UMAG_00797,UMAG_06105,UMAG_00594,UMAG_00975,UMAG_10926,UMAG_10466,UMAG_15008,UMAG_02445,UMAG_12289,UMAG_10804
GO:BP	Enriched	organophosphate & sulfur compound metabolism	GO:0009117	nucleotide metabolic process	2.82366e-05	147	635	35	UMAG_04262,UMAG_11945,UMAG_05362,UMAG_05339,UMAG_05627,UMAG_01903,UMAG_01904,UMAG_03318,UMAG_10904,UMAG_04871,UMAG_03299,UMAG_02849,UMAG_04214,UMAG_03854,UMAG_05924,UMAG_11125,UMAG_01103,UMAG_11353,UMAG_00637,UMAG_00334,UMAG_06004,UMAG_04726,UMAG_00797,UMAG_06105,UMAG_04539,UMAG_02007,UMAG_00594,UMAG_00975,UMAG_10926,UMAG_05149,UMAG_15008,UMAG_02445,UMAG_03450,UMAG_12289,UMAG_10804
GO:BP	Enriched	organophosphate & sulfur compound metabolism	GO:0006163	purine nucleotide metabolic process	3.09958e-05	91	635	26	UMAG_11945,UMAG_05362,UMAG_05339,UMAG_05627,UMAG_01903,UMAG_01904,UMAG_10904,UMAG_04871,UMAG_03299,UMAG_02849,UMAG_03854,UMAG_05924,UMAG_11125,UMAG_01103,UMAG_11353,UMAG_00334,UMAG_04726,UMAG_00797,UMAG_06105,UMAG_00594,UMAG_00975,UMAG_10926,UMAG_15008,UMAG_02445,UMAG_12289,UMAG_10804
GO:BP	Enriched	organophosphate & sulfur compound metabolism	GO:0009259	ribonucleotide metabolic process	3.9829e-05	98	635	27	UMAG_11945,UMAG_05362,UMAG_05339,UMAG_05627,UMAG_01903,UMAG_01904,UMAG_10904,UMAG_04871,UMAG_03299,UMAG_02849,UMAG_04214,UMAG_03854,UMAG_05924,UMAG_11125,UMAG_01103,UMAG_11353,UMAG_00334,UMAG_04726,UMAG_00797,UMAG_06105,UMAG_00594,UMAG_00975,UMAG_10926,UMAG_15008,UMAG_02445,UMAG_12289,UMAG_10804
GO:BP	Enriched	organophosphate & sulfur compound metabolism	GO:0006753	nucleoside phosphate metabolic process	4.8546e-05	150	635	35	UMAG_04262,UMAG_11945,UMAG_05362,UMAG_05339,UMAG_05627,UMAG_01903,UMAG_01904,UMAG_03318,UMAG_10904,UMAG_04871,UMAG_03299,UMAG_02849,UMAG_04214,UMAG_03854,UMAG_05924,UMAG_11125,UMAG_01103,UMAG_11353,UMAG_00637,UMAG_00334,UMAG_06004,UMAG_04726,UMAG_00797,UMAG_06105,UMAG_04539,UMAG_02007,UMAG_00594,UMAG_00975,UMAG_10926,UMAG_05149,UMAG_15008,UMAG_02445,UMAG_03450,UMAG_12289,UMAG_10804
GO:BP	Enriched	organophosphate & sulfur compound metabolism	GO:0009150	purine ribonucleotide metabolic process	4.9385e-05	87	635	25	UMAG_11945,UMAG_05362,UMAG_05339,UMAG_05627,UMAG_01903,UMAG_01904,UMAG_10904,UMAG_04871,UMAG_03299,UMAG_02849,UMAG_03854,UMAG_05924,UMAG_01103,UMAG_11353,UMAG_00334,UMAG_04726,UMAG_00797,UMAG_06105,UMAG_00594,UMAG_00975,UMAG_10926,UMAG_15008,UMAG_02445,UMAG_12289,UMAG_10804
GO:BP	Enriched	organophosphate & sulfur compound metabolism	GO:0006790	sulfur compound metabolic process	5.51838e-05	99	725	29	UMAG_03995,UMAG_05581,UMAG_01232,UMAG_01726,UMAG_05362,UMAG_04899,UMAG_01903,UMAG_01904,UMAG_00816,UMAG_05678,UMAG_01197,UMAG_02614,UMAG_03854,UMAG_11353,UMAG_01787,UMAG_00334,UMAG_04428,UMAG_00059,UMAG_06105,UMAG_01708,UMAG_02942,UMAG_00594,UMAG_11400,UMAG_10466,UMAG_02445,UMAG_10804,UMAG_00080,UMAG_11644,UMAG_01335
GO:BP	Enriched	organophosphate & sulfur compound metabolism	GO:0019693	ribose phosphate metabolic process	7.88768e-05	101	635	27	UMAG_11945,UMAG_05362,UMAG_05339,UMAG_05627,UMAG_01903,UMAG_01904,UMAG_10904,UMAG_04871,UMAG_03299,UMAG_02849,UMAG_04214,UMAG_03854,UMAG_05924,UMAG_11125,UMAG_01103,UMAG_11353,UMAG_00334,UMAG_04726,UMAG_00797,UMAG_06105,UMAG_00594,UMAG_00975,UMAG_10926,UMAG_15008,UMAG_02445,UMAG_12289,UMAG_10804
GO:BP	Enriched	organophosphate & sulfur compound metabolism	GO:1901135	carbohydrate derivative metabolic process	8.32507e-05	261	635	50	UMAG_10864,UMAG_10419,UMAG_05584,UMAG_11945,UMAG_05362,UMAG_05339,UMAG_02758,UMAG_04930,UMAG_05627,UMAG_01903,UMAG_01904,UMAG_03318,UMAG_03083,UMAG_10904,UMAG_04871,UMAG_04797,UMAG_03299,UMAG_02849,UMAG_11638,UMAG_04138,UMAG_04214,UMAG_03854,UMAG_10041,UMAG_05924,UMAG_01783,UMAG_06167,UMAG_11125,UMAG_01103,UMAG_03504,UMAG_11353,UMAG_00334,UMAG_04726,UMAG_00797,UMAG_11497,UMAG_03278,UMAG_06105,UMA…
GO:BP	Enriched	organophosphate & sulfur compound metabolism	GO:0009185	ribonucleoside diphosphate metabolic process	0.00184204	16	326	7	UMAG_11945,UMAG_05339,UMAG_04871,UMAG_03299,UMAG_02849,UMAG_05924,UMAG_11125
GO:BP	Enriched	organophosphate & sulfur compound metabolism	GO:0006637	acyl-CoA metabolic process	0.00290165	23	725	11	UMAG_05362,UMAG_01903,UMAG_01904,UMAG_03854,UMAG_11353,UMAG_00334,UMAG_06105,UMAG_00594,UMAG_02445,UMAG_10804,UMAG_01335
GO:BP	Enriched	organophosphate & sulfur compound metabolism	GO:0035383	thioester metabolic process	0.00290165	23	725	11	UMAG_05362,UMAG_01903,UMAG_01904,UMAG_03854,UMAG_11353,UMAG_00334,UMAG_06105,UMAG_00594,UMAG_02445,UMAG_10804,UMAG_01335
GO:BP	Enriched	organophosphate & sulfur compound metabolism	GO:0090407	organophosphate biosynthetic process	0.00402999	189	733	40	UMAG_04262,UMAG_05362,UMAG_05627,UMAG_03318,UMAG_10904,UMAG_00816,UMAG_03299,UMAG_02849,UMAG_02614,UMAG_04214,UMAG_03854,UMAG_05924,UMAG_05549,UMAG_00095,UMAG_11125,UMAG_01103,UMAG_00637,UMAG_04726,UMAG_00797,UMAG_10131,UMAG_06105,UMAG_06329,UMAG_04539,UMAG_05893,UMAG_00594,UMAG_00975,UMAG_10926,UMAG_05149,UMAG_10310,UMAG_05042,UMAG_11875,UMAG_02445,UMAG_03450,UMAG_12289,UMAG_01800,UMAG_04962,UMA…
GO:BP	Enriched	organophosphate & sulfur compound metabolism	GO:0009135	purine nucleoside diphosphate metabolic process	0.0064882	15	273	6	UMAG_11945,UMAG_05339,UMAG_04871,UMAG_03299,UMAG_02849,UMAG_05924
GO:BP	Enriched	organophosphate & sulfur compound metabolism	GO:0009179	purine ribonucleoside diphosphate metabolic process	0.0064882	15	273	6	UMAG_11945,UMAG_05339,UMAG_04871,UMAG_03299,UMAG_02849,UMAG_05924
GO:BP	Enriched	organophosphate & sulfur compound metabolism	GO:0009112	nucleobase metabolic process	0.0118966	27	690	11	UMAG_05627,UMAG_10904,UMAG_04214,UMAG_05531,UMAG_11125,UMAG_00672,UMAG_04726,UMAG_00797,UMAG_11421,UMAG_03689,UMAG_06285
GO:BP	Enriched	organophosphate & sulfur compound metabolism	GO:0009132	nucleoside diphosphate metabolic process	0.0153189	21	326	7	UMAG_11945,UMAG_05339,UMAG_04871,UMAG_03299,UMAG_02849,UMAG_05924,UMAG_11125
GO:BP	Enriched	organophosphate & sulfur compound metabolism	GO:0034032	purine nucleoside bisphosphate metabolic process	0.0154164	31	725	12	UMAG_05362,UMAG_01903,UMAG_01904,UMAG_03854,UMAG_11353,UMAG_00334,UMAG_06105,UMAG_00594,UMAG_02445,UMAG_12289,UMAG_10804,UMAG_01335
GO:BP	Enriched	organophosphate & sulfur compound metabolism	GO:0033875	ribonucleoside bisphosphate metabolic process	0.0154164	31	725	12	UMAG_05362,UMAG_01903,UMAG_01904,UMAG_03854,UMAG_11353,UMAG_00334,UMAG_06105,UMAG_00594,UMAG_02445,UMAG_12289,UMAG_10804,UMAG_01335
GO:BP	Enriched	organophosphate & sulfur compound metabolism	GO:0033865	nucleoside bisphosphate metabolic process	0.0154164	31	725	12	UMAG_05362,UMAG_01903,UMAG_01904,UMAG_03854,UMAG_11353,UMAG_00334,UMAG_06105,UMAG_00594,UMAG_02445,UMAG_12289,UMAG_10804,UMAG_01335
GO:BP	Enriched	organophosphate & sulfur compound metabolism	GO:0006090	pyruvate metabolic process	0.0359092	19	579	8	UMAG_11945,UMAG_05339,UMAG_04871,UMAG_03299,UMAG_03854,UMAG_06105,UMAG_00594,UMAG_15008
GO:BP	Enriched	organic acid & amino acid metabolism	GO:0006082	organic acid metabolic process	5.99116e-10	334	743	79	UMAG_01433,UMAG_05581,UMAG_01232,UMAG_04262,UMAG_11945,UMAG_05339,UMAG_04899,UMAG_04782,UMAG_10290,UMAG_02801,UMAG_03220,UMAG_10985,UMAG_04182,UMAG_01049,UMAG_04871,UMAG_01245,UMAG_10175,UMAG_03571,UMAG_03299,UMAG_01197,UMAG_04497,UMAG_03854,UMAG_01530,UMAG_11098,UMAG_04429,UMAG_04220,UMAG_00547,UMAG_03538,UMAG_05531,UMAG_01099,UMAG_03971,UMAG_06027,UMAG_00304,UMAG_03798,UMAG_02583,UMAG_04270,UMA…
GO:BP	Enriched	organic acid & amino acid metabolism	GO:0019752	carboxylic acid metabolic process	1.96838e-09	316	743	75	UMAG_01433,UMAG_05581,UMAG_01232,UMAG_04262,UMAG_11945,UMAG_05339,UMAG_04899,UMAG_04782,UMAG_10290,UMAG_02801,UMAG_03220,UMAG_10985,UMAG_04182,UMAG_01049,UMAG_04871,UMAG_01245,UMAG_10175,UMAG_03571,UMAG_03299,UMAG_01197,UMAG_04497,UMAG_03854,UMAG_01530,UMAG_11098,UMAG_04429,UMAG_04220,UMAG_00547,UMAG_03538,UMAG_05531,UMAG_01099,UMAG_03971,UMAG_06027,UMAG_00304,UMAG_03798,UMAG_02583,UMAG_04270,UMA…
GO:BP	Enriched	organic acid & amino acid metabolism	GO:0043436	oxoacid metabolic process	3.0883e-09	325	743	76	UMAG_01433,UMAG_05581,UMAG_01232,UMAG_04262,UMAG_11945,UMAG_05339,UMAG_04899,UMAG_04782,UMAG_10290,UMAG_02801,UMAG_03220,UMAG_10985,UMAG_04182,UMAG_01049,UMAG_04871,UMAG_01245,UMAG_10175,UMAG_03571,UMAG_03299,UMAG_01197,UMAG_04497,UMAG_03854,UMAG_01530,UMAG_11098,UMAG_04429,UMAG_04220,UMAG_00547,UMAG_03538,UMAG_05531,UMAG_01099,UMAG_03971,UMAG_06027,UMAG_00304,UMAG_03798,UMAG_02583,UMAG_04270,UMA…
GO:BP	Enriched	organic acid & amino acid metabolism	GO:0006520	cellular amino acid metabolic process	1.34225e-05	182	743	45	UMAG_05581,UMAG_01232,UMAG_04899,UMAG_04782,UMAG_10290,UMAG_02801,UMAG_10985,UMAG_04182,UMAG_01245,UMAG_04497,UMAG_01530,UMAG_11098,UMAG_04429,UMAG_04220,UMAG_00547,UMAG_03538,UMAG_05531,UMAG_06027,UMAG_00304,UMAG_03798,UMAG_04270,UMAG_00311,UMAG_01787,UMAG_10308,UMAG_05703,UMAG_02189,UMAG_04872,UMAG_00059,UMAG_01708,UMAG_11421,UMAG_00518,UMAG_11708,UMAG_11260,UMAG_10466,UMAG_03858,UMAG_10804,UMA…
GO:BP	Enriched	organic acid & amino acid metabolism	GO:0044282	small molecule catabolic process	4.57928e-05	118	743	33	UMAG_01433,UMAG_01232,UMAG_04262,UMAG_03318,UMAG_03220,UMAG_01049,UMAG_04797,UMAG_03571,UMAG_03299,UMAG_01783,UMAG_04430,UMAG_03971,UMAG_10248,UMAG_00334,UMAG_00672,UMAG_06045,UMAG_05703,UMAG_02189,UMAG_00109,UMAG_11659,UMAG_11421,UMAG_01935,UMAG_02715,UMAG_11708,UMAG_10804,UMAG_01879,UMAG_10961,UMAG_00430,UMAG_01892,UMAG_00589,UMAG_04561,UMAG_01335,UMAG_10664
GO:BP	Enriched	organic acid & amino acid metabolism	GO:0044283	small molecule biosynthetic process	8.5362e-05	236	727	51	UMAG_03182,UMAG_05362,UMAG_04899,UMAG_05627,UMAG_10290,UMAG_02801,UMAG_10904,UMAG_10985,UMAG_04182,UMAG_04871,UMAG_01245,UMAG_00816,UMAG_03299,UMAG_02849,UMAG_01197,UMAG_04497,UMAG_02614,UMAG_11098,UMAG_05549,UMAG_04429,UMAG_04220,UMAG_00547,UMAG_05531,UMAG_00304,UMAG_02583,UMAG_00311,UMAG_11808,UMAG_01787,UMAG_10538,UMAG_00797,UMAG_10308,UMAG_04872,UMAG_01708,UMAG_10079,UMAG_02007,UMAG_11363,UMA…
GO:BP	Enriched	organic acid & amino acid metabolism	GO:0008652	cellular amino acid biosynthetic process	0.000134283	86	727	26	UMAG_04899,UMAG_10290,UMAG_02801,UMAG_10985,UMAG_04182,UMAG_01245,UMAG_04497,UMAG_11098,UMAG_04429,UMAG_04220,UMAG_00547,UMAG_05531,UMAG_00304,UMAG_00311,UMAG_01787,UMAG_10308,UMAG_04872,UMAG_01708,UMAG_00518,UMAG_10466,UMAG_03858,UMAG_06285,UMAG_03537,UMAG_01233,UMAG_10357,UMAG_02385
GO:BP	Enriched	organic acid & amino acid metabolism	GO:1901605	alpha-amino acid metabolic process	0.00018161	113	743	31	UMAG_05581,UMAG_01232,UMAG_04899,UMAG_10290,UMAG_02801,UMAG_10985,UMAG_04182,UMAG_04497,UMAG_11098,UMAG_00547,UMAG_03538,UMAG_05531,UMAG_00304,UMAG_00311,UMAG_01787,UMAG_10308,UMAG_05703,UMAG_04872,UMAG_00059,UMAG_01708,UMAG_00518,UMAG_11708,UMAG_10466,UMAG_03858,UMAG_10804,UMAG_10961,UMAG_00430,UMAG_06285,UMAG_03537,UMAG_01233,UMAG_10664
GO:BP	Enriched	organic acid & amino acid metabolism	GO:1901607	alpha-amino acid biosynthetic process	0.00452126	68	720	20	UMAG_04899,UMAG_10290,UMAG_02801,UMAG_10985,UMAG_04182,UMAG_04497,UMAG_11098,UMAG_00547,UMAG_05531,UMAG_00304,UMAG_00311,UMAG_01787,UMAG_10308,UMAG_04872,UMAG_01708,UMAG_00518,UMAG_10466,UMAG_06285,UMAG_03537,UMAG_01233
GO:BP	Enriched	organic acid & amino acid metabolism	GO:0009084	glutamine family amino acid biosynthetic process	0.00546315	17	697	9	UMAG_02801,UMAG_04497,UMAG_11098,UMAG_00547,UMAG_10308,UMAG_04872,UMAG_10466,UMAG_06285,UMAG_03537
GO:BP	Enriched	organic acid & amino acid metabolism	GO:0044272	sulfur compound biosynthetic process	0.0279274	46	576	13	UMAG_01726,UMAG_04899,UMAG_00816,UMAG_01197,UMAG_02614,UMAG_03854,UMAG_01787,UMAG_06105,UMAG_01708,UMAG_02942,UMAG_00594,UMAG_11400,UMAG_10466
GO:BP	Enriched	organic acid & amino acid metabolism	GO:0046395	carboxylic acid catabolic process	0.0295739	80	743	21	UMAG_01433,UMAG_01232,UMAG_04262,UMAG_03220,UMAG_01049,UMAG_03571,UMAG_03971,UMAG_00334,UMAG_05703,UMAG_02189,UMAG_11659,UMAG_11421,UMAG_01935,UMAG_02715,UMAG_11708,UMAG_10804,UMAG_10961,UMAG_00430,UMAG_01892,UMAG_01335,UMAG_10664
GO:BP	Enriched	organic acid & amino acid metabolism	GO:0046394	carboxylic acid biosynthetic process	0.0306822	132	727	29	UMAG_04899,UMAG_10290,UMAG_02801,UMAG_10985,UMAG_04182,UMAG_01245,UMAG_01197,UMAG_04497,UMAG_11098,UMAG_04429,UMAG_04220,UMAG_00547,UMAG_05531,UMAG_00304,UMAG_02583,UMAG_00311,UMAG_01787,UMAG_10538,UMAG_10308,UMAG_04872,UMAG_01708,UMAG_00518,UMAG_10466,UMAG_03858,UMAG_06285,UMAG_03537,UMAG_01233,UMAG_10357,UMAG_02385
GO:BP	Enriched	proteasomal protein catabolism	GO:0010499	proteasomal ubiquitin-independent protein catabolic process	4.318e-09	15	706	13	UMAG_12105,UMAG_10647,UMAG_04179,UMAG_05986,UMAG_06234,UMAG_05860,UMAG_10356,UMAG_04776,UMAG_05652,UMAG_02046,UMAG_05687,UMAG_01275,UMAG_11578
GO:BP	Enriched	proteasomal protein catabolism	GO:1901575	organic substance catabolic process	7.74124e-07	497	706	92	UMAG_00133,UMAG_01433,UMAG_01232,UMAG_04262,UMAG_12105,UMAG_10419,UMAG_11945,UMAG_05339,UMAG_00525,UMAG_02758,UMAG_10873,UMAG_02684,UMAG_03318,UMAG_05334,UMAG_00711,UMAG_03220,UMAG_12161,UMAG_10647,UMAG_04179,UMAG_02149,UMAG_01049,UMAG_02495,UMAG_04871,UMAG_05986,UMAG_10175,UMAG_04797,UMAG_02562,UMAG_03571,UMAG_00557,UMAG_03299,UMAG_12277,UMAG_00622,UMAG_06234,UMAG_05860,UMAG_00095,UMAG_00585,UMA…
GO:BP	Enriched	proteasomal protein catabolism	GO:0044248	cellular catabolic process	6.02583e-05	493	731	88	UMAG_03995,UMAG_01433,UMAG_01232,UMAG_04262,UMAG_12105,UMAG_05498,UMAG_00525,UMAG_10873,UMAG_02684,UMAG_03318,UMAG_05334,UMAG_00711,UMAG_03220,UMAG_10647,UMAG_04932,UMAG_04179,UMAG_02149,UMAG_11568,UMAG_01049,UMAG_02495,UMAG_05986,UMAG_10175,UMAG_02562,UMAG_03571,UMAG_03299,UMAG_12277,UMAG_00622,UMAG_06234,UMAG_05860,UMAG_00095,UMAG_00585,UMAG_01783,UMAG_03692,UMAG_04430,UMAG_03971,UMAG_01669,UMA…
GO:BP	Enriched	proteasomal protein catabolism	GO:1901565	organonitrogen compound catabolic process	0.000732906	281	743	56	UMAG_01232,UMAG_04262,UMAG_12105,UMAG_10419,UMAG_00525,UMAG_02758,UMAG_02684,UMAG_03318,UMAG_00711,UMAG_10647,UMAG_04179,UMAG_02149,UMAG_02495,UMAG_05986,UMAG_10175,UMAG_02562,UMAG_12277,UMAG_00622,UMAG_06234,UMAG_05860,UMAG_00585,UMAG_01783,UMAG_01669,UMAG_00923,UMAG_04611,UMAG_10356,UMAG_11760,UMAG_01121,UMAG_11494,UMAG_10459,UMAG_10231,UMAG_06045,UMAG_02245,UMAG_05703,UMAG_02189,UMAG_04776,UMA…
GO:BP	Enriched	proteasomal protein catabolism	GO:0051603	proteolysis involved in cellular protein catabolic process	0.0010493	180	731	40	UMAG_12105,UMAG_00525,UMAG_02684,UMAG_00711,UMAG_10647,UMAG_04179,UMAG_02149,UMAG_02495,UMAG_05986,UMAG_02562,UMAG_12277,UMAG_00622,UMAG_06234,UMAG_05860,UMAG_00585,UMAG_01669,UMAG_00923,UMAG_04611,UMAG_10356,UMAG_11760,UMAG_01121,UMAG_11494,UMAG_10459,UMAG_10231,UMAG_02245,UMAG_04776,UMAG_04588,UMAG_10794,UMAG_03872,UMAG_05652,UMAG_10705,UMAG_02572,UMAG_03465,UMAG_05746,UMAG_01408,UMAG_02046,UMA…
GO:BP	Enriched	proteasomal protein catabolism	GO:0044257	cellular protein catabolic process	0.00140898	182	731	40	UMAG_12105,UMAG_00525,UMAG_02684,UMAG_00711,UMAG_10647,UMAG_04179,UMAG_02149,UMAG_02495,UMAG_05986,UMAG_02562,UMAG_12277,UMAG_00622,UMAG_06234,UMAG_05860,UMAG_00585,UMAG_01669,UMAG_00923,UMAG_04611,UMAG_10356,UMAG_11760,UMAG_01121,UMAG_11494,UMAG_10459,UMAG_10231,UMAG_02245,UMAG_04776,UMAG_04588,UMAG_10794,UMAG_03872,UMAG_05652,UMAG_10705,UMAG_02572,UMAG_03465,UMAG_05746,UMAG_01408,UMAG_02046,UMA…
GO:BP	Enriched	proteasomal protein catabolism	GO:0010498	proteasomal protein catabolic process	0.00202448	115	731	29	UMAG_12105,UMAG_00525,UMAG_00711,UMAG_10647,UMAG_04179,UMAG_02149,UMAG_05986,UMAG_02562,UMAG_12277,UMAG_00622,UMAG_06234,UMAG_05860,UMAG_00585,UMAG_04611,UMAG_10356,UMAG_01121,UMAG_11494,UMAG_10459,UMAG_10231,UMAG_02245,UMAG_04776,UMAG_05652,UMAG_10705,UMAG_02572,UMAG_02046,UMAG_05687,UMAG_01275,UMAG_11578,UMAG_04277
GO:BP	Enriched	proteasomal protein catabolism	GO:0030163	protein catabolic process	0.00562563	192	731	40	UMAG_12105,UMAG_00525,UMAG_02684,UMAG_00711,UMAG_10647,UMAG_04179,UMAG_02149,UMAG_02495,UMAG_05986,UMAG_02562,UMAG_12277,UMAG_00622,UMAG_06234,UMAG_05860,UMAG_00585,UMAG_01669,UMAG_00923,UMAG_04611,UMAG_10356,UMAG_11760,UMAG_01121,UMAG_11494,UMAG_10459,UMAG_10231,UMAG_02245,UMAG_04776,UMAG_04588,UMAG_10794,UMAG_03872,UMAG_05652,UMAG_10705,UMAG_02572,UMAG_03465,UMAG_05746,UMAG_01408,UMAG_02046,UMA…
GO:BP	Enriched	proteasomal protein catabolism	GO:0006511	ubiquitin-dependent protein catabolic process	0.0146776	159	731	34	UMAG_12105,UMAG_00525,UMAG_02684,UMAG_10647,UMAG_04179,UMAG_02149,UMAG_02495,UMAG_05986,UMAG_02562,UMAG_12277,UMAG_06234,UMAG_05860,UMAG_00585,UMAG_01669,UMAG_00923,UMAG_04611,UMAG_10356,UMAG_11760,UMAG_01121,UMAG_11494,UMAG_10231,UMAG_02245,UMAG_04776,UMAG_10794,UMAG_03872,UMAG_05652,UMAG_10705,UMAG_02572,UMAG_05746,UMAG_02046,UMAG_05687,UMAG_01275,UMAG_11578,UMAG_04277
GO:BP	Enriched	proteasomal protein catabolism	GO:0019941	modification-dependent protein catabolic process	0.0153761	166	731	35	UMAG_12105,UMAG_00525,UMAG_02684,UMAG_10647,UMAG_04179,UMAG_02149,UMAG_02495,UMAG_05986,UMAG_02562,UMAG_12277,UMAG_06234,UMAG_05860,UMAG_00585,UMAG_01669,UMAG_00923,UMAG_04611,UMAG_10356,UMAG_11760,UMAG_01121,UMAG_11494,UMAG_10231,UMAG_02245,UMAG_04776,UMAG_04588,UMAG_10794,UMAG_03872,UMAG_05652,UMAG_10705,UMAG_02572,UMAG_05746,UMAG_02046,UMAG_05687,UMAG_01275,UMAG_11578,UMAG_04277
GO:BP	Enriched	proteasomal protein catabolism	GO:0043161	proteasome-mediated ubiquitin-dependent protein catabolic process	0.0317903	106	731	25	UMAG_12105,UMAG_00525,UMAG_10647,UMAG_04179,UMAG_02149,UMAG_05986,UMAG_12277,UMAG_06234,UMAG_05860,UMAG_00585,UMAG_04611,UMAG_10356,UMAG_01121,UMAG_11494,UMAG_10231,UMAG_02245,UMAG_04776,UMAG_05652,UMAG_10705,UMAG_02572,UMAG_02046,UMAG_05687,UMAG_01275,UMAG_11578,UMAG_04277
GO:BP	Enriched	proteasomal protein catabolism	GO:0043632	modification-dependent macromolecule catabolic process	0.0485293	175	731	35	UMAG_12105,UMAG_00525,UMAG_02684,UMAG_10647,UMAG_04179,UMAG_02149,UMAG_02495,UMAG_05986,UMAG_02562,UMAG_12277,UMAG_06234,UMAG_05860,UMAG_00585,UMAG_01669,UMAG_00923,UMAG_04611,UMAG_10356,UMAG_11760,UMAG_01121,UMAG_11494,UMAG_10231,UMAG_02245,UMAG_04776,UMAG_04588,UMAG_10794,UMAG_03872,UMAG_05652,UMAG_10705,UMAG_02572,UMAG_05746,UMAG_02046,UMAG_05687,UMAG_01275,UMAG_11578,UMAG_04277
GO:BP	Enriched	actin organisation	GO:0007015	actin filament organization	0.0100925	43	654	14	UMAG_02388,UMAG_11177,UMAG_10832,UMAG_05734,UMAG_11479,UMAG_03598,UMAG_05405,UMAG_11265,UMAG_00423,UMAG_11283,UMAG_04314,UMAG_02181,UMAG_11610,UMAG_05283
GO:BP	Enriched	actin organisation	GO:0008154	actin polymerization or depolymerization	0.0119646	24	642	10	UMAG_02388,UMAG_11177,UMAG_10832,UMAG_11479,UMAG_05405,UMAG_11265,UMAG_00423,UMAG_04314,UMAG_02181,UMAG_11610
GO:BP	Enriched	actin organisation	GO:0032970	regulation of actin filament-based process	0.0131696	35	731	13	UMAG_02388,UMAG_11177,UMAG_10832,UMAG_05734,UMAG_11479,UMAG_04448,UMAG_05405,UMAG_11265,UMAG_10705,UMAG_00423,UMAG_02181,UMAG_11610,UMAG_04277
GO:BP	Enriched	actin organisation	GO:0030833	regulation of actin filament polymerization	0.0148305	20	642	9	UMAG_02388,UMAG_11177,UMAG_10832,UMAG_11479,UMAG_05405,UMAG_11265,UMAG_00423,UMAG_02181,UMAG_11610
GO:BP	Enriched	actin organisation	GO:0008064	regulation of actin polymerization or depolymerization	0.0238751	21	642	9	UMAG_02388,UMAG_11177,UMAG_10832,UMAG_11479,UMAG_05405,UMAG_11265,UMAG_00423,UMAG_02181,UMAG_11610
GO:BP	Enriched	actin organisation	GO:0030041	actin filament polymerization	0.0238751	21	642	9	UMAG_02388,UMAG_11177,UMAG_10832,UMAG_11479,UMAG_05405,UMAG_11265,UMAG_00423,UMAG_02181,UMAG_11610
GO:BP	Enriched	actin organisation	GO:0030832	regulation of actin filament length	0.0238751	21	642	9	UMAG_02388,UMAG_11177,UMAG_10832,UMAG_11479,UMAG_05405,UMAG_11265,UMAG_00423,UMAG_02181,UMAG_11610
GO:BP	Enriched	actin organisation	GO:0110053	regulation of actin filament organization	0.0371716	22	642	9	UMAG_02388,UMAG_11177,UMAG_10832,UMAG_11479,UMAG_05405,UMAG_11265,UMAG_00423,UMAG_02181,UMAG_11610
GO:BP	Enriched	actin organisation	GO:0051494	negative regulation of cytoskeleton organization	0.0463725	10	642	6	UMAG_11177,UMAG_10832,UMAG_10705,UMAG_00423,UMAG_02181,UMAG_11610
GO:BP	Enriched	actin organisation	GO:0032956	regulation of actin cytoskeleton organization	0.0485677	34	731	12	UMAG_02388,UMAG_11177,UMAG_10832,UMAG_05734,UMAG_11479,UMAG_05405,UMAG_11265,UMAG_10705,UMAG_00423,UMAG_02181,UMAG_11610,UMAG_04277
GO:BP	Enriched	redox processes & generation of energy	GO:0055114	obsolete oxidation-reduction process	1.27606e-13	457	532	86	UMAG_02215,UMAG_02984,UMAG_02888,UMAG_03995,UMAG_04370,UMAG_06042,UMAG_06404,UMAG_10260,UMAG_03524,UMAG_06374,UMAG_11528,UMAG_03229,UMAG_11338,UMAG_00108,UMAG_04480,UMAG_01861,UMAG_10847,UMAG_03221,UMAG_01567,UMAG_02492,UMAG_11650,UMAG_12206,UMAG_04930,UMAG_04899,UMAG_02985,UMAG_10665,UMAG_03688,UMAG_00458,UMAG_02801,UMAG_10002,UMAG_03523,UMAG_10596,UMAG_04182,UMAG_01049,UMAG_01245,UMAG_02592,UMA…
GO:BP	Enriched	redox processes & generation of energy	GO:0006091	generation of precursor metabolites and energy	0.000968279	119	641	28	UMAG_11528,UMAG_11338,UMAG_10847,UMAG_05584,UMAG_11945,UMAG_05339,UMAG_04930,UMAG_01903,UMAG_01904,UMAG_04871,UMAG_05625,UMAG_04797,UMAG_03299,UMAG_10392,UMAG_04138,UMAG_00940,UMAG_11353,UMAG_11436,UMAG_04948,UMAG_00109,UMAG_03811,UMAG_10705,UMAG_05841,UMAG_15008,UMAG_11645,UMAG_00038,UMAG_10804,UMAG_10232
GO:BP	Enriched	redox processes & generation of energy	GO:0051156	glucose 6-phosphate metabolic process	0.00281095	14	603	8	UMAG_11945,UMAG_04930,UMAG_04797,UMAG_03299,UMAG_04138,UMAG_03811,UMAG_15008,UMAG_00038
GO:BP	Enriched	redox processes & generation of energy	GO:0006739	NADP metabolic process	0.0180378	17	603	8	UMAG_04930,UMAG_04797,UMAG_03299,UMAG_10392,UMAG_04138,UMAG_04539,UMAG_03811,UMAG_00038
GO:BP	Enriched	redox processes & generation of energy	GO:0006740	NADPH regeneration	0.0191421	13	603	7	UMAG_04930,UMAG_04797,UMAG_03299,UMAG_10392,UMAG_04138,UMAG_03811,UMAG_00038
GO:BP	Enriched	nucleoside metabolic process	GO:0009116	nucleoside metabolic process	0.0225872	28	576	10	UMAG_05627,UMAG_03318,UMAG_10904,UMAG_02849,UMAG_05924,UMAG_01783,UMAG_03504,UMAG_00797,UMAG_03689,UMAG_10466
GO:BP	Enriched	nucleoside metabolic process	GO:0006166	purine ribonucleoside salvage	0.0241258	4	576	4	UMAG_05627,UMAG_10904,UMAG_00797,UMAG_10466
GO:BP	Enriched	nucleoside metabolic process	GO:0043174	nucleoside salvage	0.0241258	4	576	4	UMAG_05627,UMAG_10904,UMAG_00797,UMAG_10466
GO:BP	Enriched	nucleoside metabolic process	GO:1901657	glycosyl compound metabolic process	0.0445163	30	576	10	UMAG_05627,UMAG_03318,UMAG_10904,UMAG_02849,UMAG_05924,UMAG_01783,UMAG_03504,UMAG_00797,UMAG_03689,UMAG_10466
GO:BP	Enriched	vesicle-mediated transport	GO:0016192	vesicle-mediated transport	5.76861e-05	227	726	50	UMAG_00553,UMAG_06292,UMAG_05607,UMAG_01316,UMAG_02678,UMAG_05498,UMAG_01637,UMAG_03266,UMAG_10313,UMAG_01845,UMAG_03838,UMAG_01058,UMAG_11568,UMAG_05901,UMAG_10158,UMAG_05406,UMAG_10448,UMAG_03598,UMAG_10571,UMAG_05405,UMAG_00387,UMAG_11439,UMAG_01669,UMAG_02889,UMAG_05640,UMAG_04265,UMAG_01651,UMAG_00160,UMAG_02245,UMAG_03278,UMAG_05526,UMAG_10794,UMAG_03872,UMAG_03144,UMAG_03027,UMAG_10229,UMA…
GO:BP	Enriched	vesicle-mediated transport	GO:0033036	macromolecule localization	0.00739436	475	667	73	UMAG_05544,UMAG_02754,UMAG_04352,UMAG_06292,UMAG_05607,UMAG_01316,UMAG_02678,UMAG_05498,UMAG_03266,UMAG_12166,UMAG_10313,UMAG_01845,UMAG_10832,UMAG_05734,UMAG_03838,UMAG_01058,UMAG_10286,UMAG_04932,UMAG_11568,UMAG_03449,UMAG_05761,UMAG_11511,UMAG_02562,UMAG_03983,UMAG_05901,UMAG_10158,UMAG_03599,UMAG_05406,UMAG_10448,UMAG_00673,UMAG_00387,UMAG_10644,UMAG_15077,UMAG_10503,UMAG_01669,UMAG_02583,UMA…
GO:BP	Enriched	monosaccharide metabolic process	GO:0005996	monosaccharide metabolic process	0.0314679	40	681	13	UMAG_11675,UMAG_11945,UMAG_04930,UMAG_04871,UMAG_04797,UMAG_00557,UMAG_03299,UMAG_10248,UMAG_10705,UMAG_15008,UMAG_10797,UMAG_04456,UMAG_04561
GO:BP	Enriched	monosaccharide metabolic process	GO:0019318	hexose metabolic process	0.0359077	33	615	11	UMAG_11675,UMAG_11945,UMAG_04930,UMAG_04871,UMAG_00557,UMAG_03299,UMAG_10248,UMAG_10705,UMAG_15008,UMAG_10797,UMAG_04456
GO:BP	Enriched	pathogenesis	GO:0009405	pathogenesis	0.0203966	13	111	4	UMAG_01433,UMAG_01432,UMAG_11338,UMAG_05362
GO:BP	Enriched	cytoskeleton-dependent cytokinesis	GO:0061640	cytoskeleton-dependent cytokinesis	0.0325715	17	654	8	UMAG_04352,UMAG_04448,UMAG_03449,UMAG_03599,UMAG_10644,UMAG_10503,UMAG_10705,UMAG_05283
GO:CC	Enriched	vacuolar proton-transporting ATPase	GO:0033180	proton-transporting V-type ATPase, V1 domain	8.19884e-06	7	662	7	UMAG_11520,UMAG_04716,UMAG_02064,UMAG_05503,UMAG_04345,UMAG_10926,UMAG_11698
GO:CC	Enriched	vacuolar proton-transporting ATPase	GO:0033176	proton-transporting V-type ATPase complex	3.56694e-05	13	662	9	UMAG_11520,UMAG_04716,UMAG_02064,UMAG_05503,UMAG_02782,UMAG_04345,UMAG_04167,UMAG_10926,UMAG_11698
GO:CC	Enriched	vacuolar proton-transporting ATPase	GO:0016471	vacuolar proton-transporting V-type ATPase complex	0.00011888	7	509	6	UMAG_11520,UMAG_04716,UMAG_05503,UMAG_02782,UMAG_04345,UMAG_04167
GO:CC	Enriched	vacuolar proton-transporting ATPase	GO:0000221	vacuolar proton-transporting V-type ATPase, V1 domain	0.000434751	4	302	4	UMAG_11520,UMAG_04716,UMAG_05503,UMAG_04345
GO:CC	Enriched	vacuolar proton-transporting ATPase	GO:0033178	proton-transporting two-sector ATPase complex, catalytic domain	0.000637986	13	662	8	UMAG_11520,UMAG_04716,UMAG_02064,UMAG_05503,UMAG_04345,UMAG_01103,UMAG_10926,UMAG_11698
GO:CC	Enriched	vacuolar proton-transporting ATPase	GO:0098796	membrane protein complex	0.000739211	226	692	44	UMAG_06292,UMAG_05607,UMAG_11520,UMAG_10177,UMAG_01316,UMAG_02678,UMAG_12166,UMAG_04716,UMAG_01058,UMAG_02064,UMAG_05625,UMAG_05901,UMAG_10158,UMAG_05503,UMAG_05406,UMAG_10448,UMAG_03598,UMAG_02782,UMAG_04345,UMAG_00940,UMAG_01103,UMAG_01669,UMAG_02889,UMAG_05640,UMAG_04265,UMAG_00160,UMAG_02245,UMAG_05526,UMAG_03872,UMAG_03144,UMAG_04167,UMAG_00975,UMAG_10926,UMAG_11167,UMAG_02476,UMAG_02572,UMA…
GO:CC	Enriched	vacuolar proton-transporting ATPase	GO:0016469	proton-transporting two-sector ATPase complex	0.00192749	27	662	11	UMAG_11520,UMAG_04716,UMAG_02064,UMAG_05503,UMAG_02782,UMAG_04345,UMAG_01103,UMAG_04167,UMAG_00975,UMAG_10926,UMAG_11698
GO:CC	Enriched	vacuolar proton-transporting ATPase	GO:0005774	vacuolar membrane	0.044519	74	593	16	UMAG_10465,UMAG_11520,UMAG_04716,UMAG_04932,UMAG_00557,UMAG_05503,UMAG_05942,UMAG_02782,UMAG_04345,UMAG_06408,UMAG_00160,UMAG_04167,UMAG_03027,UMAG_10926,UMAG_05511,UMAG_15050
GO:CC	Enriched	proteasome complex	GO:0000502	proteasome complex	1.32446e-14	35	706	24	UMAG_12105,UMAG_02684,UMAG_00711,UMAG_10647,UMAG_04179,UMAG_02495,UMAG_05986,UMAG_02562,UMAG_00622,UMAG_06234,UMAG_05860,UMAG_00585,UMAG_10356,UMAG_11760,UMAG_01121,UMAG_10459,UMAG_10231,UMAG_04776,UMAG_10918,UMAG_05652,UMAG_02046,UMAG_05687,UMAG_01275,UMAG_11578
GO:CC	Enriched	proteasome complex	GO:1905369	endopeptidase complex	1.22454e-12	40	706	24	UMAG_12105,UMAG_02684,UMAG_00711,UMAG_10647,UMAG_04179,UMAG_02495,UMAG_05986,UMAG_02562,UMAG_00622,UMAG_06234,UMAG_05860,UMAG_00585,UMAG_10356,UMAG_11760,UMAG_01121,UMAG_10459,UMAG_10231,UMAG_04776,UMAG_10918,UMAG_05652,UMAG_02046,UMAG_05687,UMAG_01275,UMAG_11578
GO:CC	Enriched	proteasome complex	GO:0005839	proteasome core complex	1.52527e-10	14	706	13	UMAG_12105,UMAG_10647,UMAG_04179,UMAG_05986,UMAG_06234,UMAG_05860,UMAG_10356,UMAG_04776,UMAG_05652,UMAG_02046,UMAG_05687,UMAG_01275,UMAG_11578
GO:CC	Enriched	proteasome complex	GO:1905368	peptidase complex	2.20012e-09	60	706	26	UMAG_12105,UMAG_12166,UMAG_02684,UMAG_00711,UMAG_10647,UMAG_04179,UMAG_02495,UMAG_05986,UMAG_02562,UMAG_00622,UMAG_06234,UMAG_05860,UMAG_00585,UMAG_10356,UMAG_11760,UMAG_01121,UMAG_10459,UMAG_10231,UMAG_04776,UMAG_10918,UMAG_05652,UMAG_00481,UMAG_02046,UMAG_05687,UMAG_01275,UMAG_11578
GO:CC	Enriched	proteasome complex	GO:0022624	proteasome accessory complex	3.9835e-06	21	490	11	UMAG_02684,UMAG_00711,UMAG_02495,UMAG_02562,UMAG_00622,UMAG_00585,UMAG_11760,UMAG_01121,UMAG_10459,UMAG_10231,UMAG_10918
GO:CC	Enriched	proteasome complex	GO:0019773	proteasome core complex, alpha-subunit complex	1.28897e-05	7	706	7	UMAG_05986,UMAG_06234,UMAG_04776,UMAG_05652,UMAG_02046,UMAG_05687,UMAG_11578
GO:CC	Enriched	proteasome complex	GO:0005838	proteasome regulatory particle	3.07797e-05	20	490	10	UMAG_02684,UMAG_02495,UMAG_02562,UMAG_00622,UMAG_00585,UMAG_11760,UMAG_01121,UMAG_10459,UMAG_10231,UMAG_10918
GO:CC	Enriched	proteasome complex	GO:0008541	proteasome regulatory particle, lid subcomplex	0.00981545	8	490	5	UMAG_02684,UMAG_02495,UMAG_00585,UMAG_10231,UMAG_10918
GO:CC	Enriched	septin complex	GO:0031105	septin complex	0.000555581	4	321	4	UMAG_03449,UMAG_03599,UMAG_10644,UMAG_10503
GO:CC	Enriched	septin complex	GO:0005940	septin ring	0.00267805	5	321	4	UMAG_03449,UMAG_03599,UMAG_10644,UMAG_10503
GO:CC	Enriched	septin complex	GO:0032156	septin cytoskeleton	0.00267805	5	321	4	UMAG_03449,UMAG_03599,UMAG_10644,UMAG_10503
GO:CC	Enriched	septin complex	GO:0005856	cytoskeleton	0.0028029	146	654	30	UMAG_02388,UMAG_04352,UMAG_04598,UMAG_11177,UMAG_10832,UMAG_05734,UMAG_11479,UMAG_00163,UMAG_04448,UMAG_03449,UMAG_05761,UMAG_03100,UMAG_03599,UMAG_05405,UMAG_10644,UMAG_03910,UMAG_10503,UMAG_10119,UMAG_04487,UMAG_11265,UMAG_11692,UMAG_10705,UMAG_00423,UMAG_11283,UMAG_04314,UMAG_02181,UMAG_12129,UMAG_10558,UMAG_11610,UMAG_05283
GO:CC	Enriched	organelle / vesicle membrane	GO:0098588	bounding membrane of organelle	0.0106013	240	701	43	UMAG_10465,UMAG_02388,UMAG_11437,UMAG_05607,UMAG_11520,UMAG_01316,UMAG_04716,UMAG_04932,UMAG_00557,UMAG_05901,UMAG_10158,UMAG_05503,UMAG_05942,UMAG_03598,UMAG_02782,UMAG_04345,UMAG_11439,UMAG_01669,UMAG_00297,UMAG_06408,UMAG_05640,UMAG_00160,UMAG_02245,UMAG_03278,UMAG_11659,UMAG_06329,UMAG_03872,UMAG_03144,UMAG_05390,UMAG_04167,UMAG_03027,UMAG_10229,UMAG_10926,UMAG_10102,UMAG_02476,UMAG_05511,UMA…
GO:CC	Enriched	organelle / vesicle membrane	GO:0030117	membrane coat	0.0356148	29	691	10	UMAG_01316,UMAG_01058,UMAG_10158,UMAG_10448,UMAG_03598,UMAG_05640,UMAG_02245,UMAG_03144,UMAG_02476,UMAG_05992
GO:CC	Enriched	organelle / vesicle membrane	GO:0048475	coated membrane	0.0356148	29	691	10	UMAG_01316,UMAG_01058,UMAG_10158,UMAG_10448,UMAG_03598,UMAG_05640,UMAG_02245,UMAG_03144,UMAG_02476,UMAG_05992
GO:CC	Enriched	organelle / vesicle membrane	GO:0030662	coated vesicle membrane	0.0360416	29	692	10	UMAG_01316,UMAG_05901,UMAG_10158,UMAG_03598,UMAG_05640,UMAG_02245,UMAG_03144,UMAG_02476,UMAG_05992,UMAG_11027
GO:CC	Enriched	cytosol	GO:0005829	cytosol	3.58506e-08	442	748	90	UMAG_06404,UMAG_06292,UMAG_02678,UMAG_05498,UMAG_11945,UMAG_10552,UMAG_01850,UMAG_01567,UMAG_06159,UMAG_04782,UMAG_02801,UMAG_05693,UMAG_04932,UMAG_11568,UMAG_02495,UMAG_04871,UMAG_02415,UMAG_01245,UMAG_04797,UMAG_03299,UMAG_02849,UMAG_05901,UMAG_04214,UMAG_01530,UMAG_05406,UMAG_01783,UMAG_06167,UMAG_10571,UMAG_04430,UMAG_00673,UMAG_11561,UMAG_06027,UMAG_00923,UMAG_04270,UMAG_12236,UMAG_00311,UMA…
GO:MF	Enriched	proton-transporting ATPase	GO:0044769	ATPase activity, coupled to transmembrane movement of ions, rotational mechanism	0.00335757	17	548	8	UMAG_11520,UMAG_04716,UMAG_02064,UMAG_05503,UMAG_02782,UMAG_01103,UMAG_04167,UMAG_10926
GO:MF	Enriched	proton-transporting ATPase	GO:0046961	proton-transporting ATPase activity, rotational mechanism	0.00335757	17	548	8	UMAG_11520,UMAG_04716,UMAG_02064,UMAG_05503,UMAG_02782,UMAG_01103,UMAG_04167,UMAG_10926
GO:MF	Enriched	proton-transporting ATPase	GO:0042625	ATPase-coupled ion transmembrane transporter activity	0.0483684	29	548	9	UMAG_11520,UMAG_04716,UMAG_02064,UMAG_05503,UMAG_02782,UMAG_04345,UMAG_01103,UMAG_04167,UMAG_10926
GO:MF	Enriched	proton-transporting ATPase	GO:0019829	ATPase-coupled cation transmembrane transporter activity	0.0483684	29	548	9	UMAG_11520,UMAG_04716,UMAG_02064,UMAG_05503,UMAG_02782,UMAG_04345,UMAG_01103,UMAG_04167,UMAG_10926
GO:MF	Enriched	oxidoreductase	GO:0016616	oxidoreductase activity, acting on the CH-OH group of donors, NAD or NADP as acceptor	3.40929e-06	82	722	27	UMAG_02888,UMAG_06374,UMAG_00108,UMAG_04480,UMAG_01861,UMAG_01567,UMAG_04930,UMAG_01245,UMAG_02592,UMAG_04057,UMAG_00407,UMAG_00095,UMAG_01099,UMAG_11741,UMAG_10538,UMAG_01072,UMAG_11323,UMAG_02189,UMAG_01708,UMAG_05893,UMAG_00555,UMAG_10605,UMAG_00283,UMAG_04127,UMAG_10483,UMAG_01233,UMAG_11598
GO:MF	Enriched	oxidoreductase	GO:0016614	oxidoreductase activity, acting on CH-OH group of donors	0.000214699	104	722	28	UMAG_02888,UMAG_06374,UMAG_00108,UMAG_04480,UMAG_01861,UMAG_01567,UMAG_04930,UMAG_01245,UMAG_02592,UMAG_01314,UMAG_04057,UMAG_00407,UMAG_00095,UMAG_01099,UMAG_11741,UMAG_10538,UMAG_01072,UMAG_11323,UMAG_02189,UMAG_01708,UMAG_05893,UMAG_00555,UMAG_10605,UMAG_00283,UMAG_04127,UMAG_10483,UMAG_01233,UMAG_11598
GO:MF	Enriched	oxidoreductase	GO:0051287	NAD binding	0.000502436	34	514	12	UMAG_04899,UMAG_04182,UMAG_01245,UMAG_02592,UMAG_00407,UMAG_01099,UMAG_01072,UMAG_11323,UMAG_12006,UMAG_02189,UMAG_05239,UMAG_00555
GO:MF	Enriched	molecular adaptor	GO:0060090	molecular adaptor activity	0.000183746	42	692	16	UMAG_02388,UMAG_03449,UMAG_05901,UMAG_03599,UMAG_05406,UMAG_10448,UMAG_10644,UMAG_10503,UMAG_02889,UMAG_00160,UMAG_01789,UMAG_05526,UMAG_03144,UMAG_15050,UMAG_12108,UMAG_11027
GO:MF	Enriched	molecular adaptor	GO:0030674	protein-macromolecule adaptor activity	0.00754316	33	692	12	UMAG_02388,UMAG_05901,UMAG_05406,UMAG_10448,UMAG_02889,UMAG_00160,UMAG_01789,UMAG_05526,UMAG_03144,UMAG_15050,UMAG_12108,UMAG_11027
GO:MF	Enriched	isomerase / phosphotransferase	GO:0016853	isomerase activity	0.000310322	75	579	20	UMAG_11675,UMAG_01433,UMAG_05339,UMAG_05627,UMAG_03220,UMAG_10536,UMAG_04797,UMAG_03299,UMAG_02923,UMAG_05549,UMAG_04220,UMAG_06167,UMAG_01720,UMAG_12017,UMAG_10248,UMAG_11054,UMAG_01853,UMAG_10079,UMAG_02185,UMAG_15008
GO:MF	Enriched	isomerase / phosphotransferase	GO:0016868	intramolecular transferase activity, phosphotransferases	0.0324388	12	343	5	UMAG_05339,UMAG_05627,UMAG_02923,UMAG_01720,UMAG_12017
GO:MF	Enriched	threonine-type peptidase	GO:0004298	threonine-type endopeptidase activity	2.38245e-10	14	706	13	UMAG_12105,UMAG_10647,UMAG_04179,UMAG_05986,UMAG_06234,UMAG_05860,UMAG_10356,UMAG_04776,UMAG_05652,UMAG_02046,UMAG_05687,UMAG_01275,UMAG_11578
GO:MF	Enriched	threonine-type peptidase	GO:0070003	threonine-type peptidase activity	9.94428e-08	18	706	13	UMAG_12105,UMAG_10647,UMAG_04179,UMAG_05986,UMAG_06234,UMAG_05860,UMAG_10356,UMAG_04776,UMAG_05652,UMAG_02046,UMAG_05687,UMAG_01275,UMAG_11578
GO:MF	Enriched	pentosyl transferase	GO:0016763	transferase activity, transferring pentosyl groups	0.00552389	15	687	8	UMAG_04262,UMAG_05627,UMAG_10904,UMAG_11400,UMAG_00518,UMAG_10466,UMAG_03858,UMAG_04714
GO:MF	Enriched	glucosamine 6-phosphate N-acetyltransferase	GO:0004343	glucosamine 6-phosphate N-acetyltransferase activity	0.0116953	3	272	3	UMAG_10864,UMAG_11638,UMAG_10041
GO:MF	Enriched	actin filament binding	GO:0051015	actin filament binding	0.0215063	28	642	10	UMAG_02388,UMAG_11177,UMAG_11479,UMAG_05405,UMAG_11265,UMAG_00423,UMAG_11283,UMAG_04314,UMAG_02181,UMAG_11610
GO:MF	Enriched	proteasome-activating ATPase	GO:0036402	proteasome-activating ATPase activity	0.0407974	3	412	3	UMAG_02562,UMAG_00622,UMAG_10459

## Sheet: Depleted
Table S2B. Overrepresented GO terms among transcripts depleted from EVs.
GO term class	Enrichement in EVs	Cluster name	GO term ID	GO term name	adjusted p-value	GO term size	query_size	Number of hits	Gene ID
GO:BP	Depleted	transmembrane transport	GO:0055085	transmembrane transport	3.99055e-33	405	675	125	UMAG_10365,UMAG_00477,UMAG_10606,UMAG_00371,UMAG_05794,UMAG_00712,UMAG_00450,UMAG_05411,UMAG_00696,UMAG_05253,UMAG_15074,UMAG_04478,UMAG_04347,UMAG_04923,UMAG_04771,UMAG_02598,UMAG_05034,UMAG_03861,UMAG_11683,UMAG_02581,UMAG_02686,UMAG_05122,UMAG_12169,UMAG_03470,UMAG_00343,UMAG_03884,UMAG_11514,UMAG_05346,UMAG_10400,UMAG_00096,UMAG_02568,UMAG_02763,UMAG_02237,UMAG_02062,UMAG_01138,UMAG_11829,UMA…
GO:BP	Depleted	transmembrane transport	GO:0006812	cation transport	9.13585e-18	164	880	67	UMAG_10606,UMAG_05411,UMAG_04923,UMAG_04065,UMAG_04771,UMAG_02581,UMAG_02730,UMAG_03470,UMAG_03884,UMAG_11514,UMAG_00096,UMAG_02237,UMAG_02993,UMAG_02081,UMAG_11500,UMAG_05458,UMAG_04550,UMAG_05979,UMAG_00204,UMAG_05023,UMAG_05420,UMAG_15043,UMAG_01656,UMAG_11407,UMAG_10608,UMAG_04319,UMAG_04423,UMAG_04602,UMAG_01205,UMAG_02221,UMAG_10048,UMAG_03876,UMAG_11171,UMAG_10653,UMAG_03045,UMAG_03812,UMA…
GO:BP	Depleted	transmembrane transport	GO:0098655	cation transmembrane transport	8.21599e-17	138	812	57	UMAG_10606,UMAG_05411,UMAG_04923,UMAG_04771,UMAG_02581,UMAG_03470,UMAG_03884,UMAG_11514,UMAG_00096,UMAG_02237,UMAG_02993,UMAG_02081,UMAG_11500,UMAG_04550,UMAG_00204,UMAG_05023,UMAG_05420,UMAG_15043,UMAG_01656,UMAG_11407,UMAG_10608,UMAG_04319,UMAG_04423,UMAG_04602,UMAG_01205,UMAG_02221,UMAG_10048,UMAG_03876,UMAG_11171,UMAG_10653,UMAG_03812,UMAG_05132,UMAG_01429,UMAG_05825,UMAG_06148,UMAG_01797,UMA…
GO:BP	Depleted	transmembrane transport	GO:0034220	ion transmembrane transport	5.75699e-16	261	812	82	UMAG_10606,UMAG_00371,UMAG_05411,UMAG_04347,UMAG_04923,UMAG_04771,UMAG_02581,UMAG_05122,UMAG_12169,UMAG_03470,UMAG_00343,UMAG_03884,UMAG_11514,UMAG_00096,UMAG_02568,UMAG_02237,UMAG_11829,UMAG_02993,UMAG_02081,UMAG_11500,UMAG_10195,UMAG_05458,UMAG_04550,UMAG_00204,UMAG_05023,UMAG_05420,UMAG_15043,UMAG_01656,UMAG_10378,UMAG_11407,UMAG_10608,UMAG_04319,UMAG_01062,UMAG_04423,UMAG_04602,UMAG_01205,UMA…
GO:BP	Depleted	transmembrane transport	GO:0098662	inorganic cation transmembrane transport	6.86292e-16	114	812	50	UMAG_05411,UMAG_04771,UMAG_02581,UMAG_03470,UMAG_11514,UMAG_00096,UMAG_02237,UMAG_02993,UMAG_02081,UMAG_11500,UMAG_04550,UMAG_00204,UMAG_05023,UMAG_05420,UMAG_15043,UMAG_01656,UMAG_10608,UMAG_04319,UMAG_04423,UMAG_04602,UMAG_01205,UMAG_10048,UMAG_03876,UMAG_11171,UMAG_03812,UMAG_05132,UMAG_01429,UMAG_05825,UMAG_06148,UMAG_01797,UMAG_01258,UMAG_05038,UMAG_11751,UMAG_10210,UMAG_00630,UMAG_02203,UMA…
GO:BP	Depleted	transmembrane transport	GO:0098660	inorganic ion transmembrane transport	8.91668e-15	124	812	51	UMAG_05411,UMAG_04771,UMAG_02581,UMAG_03470,UMAG_11514,UMAG_00096,UMAG_02237,UMAG_02993,UMAG_02081,UMAG_11500,UMAG_04550,UMAG_00204,UMAG_05023,UMAG_05420,UMAG_15043,UMAG_01656,UMAG_10608,UMAG_04319,UMAG_04423,UMAG_04602,UMAG_01205,UMAG_10048,UMAG_03876,UMAG_11171,UMAG_03812,UMAG_05132,UMAG_01429,UMAG_05825,UMAG_06148,UMAG_01797,UMAG_01258,UMAG_05038,UMAG_11751,UMAG_10210,UMAG_00630,UMAG_02203,UMA…
GO:BP	Depleted	transmembrane transport	GO:0030001	metal ion transport	1.97876e-09	36	962	23	UMAG_03470,UMAG_00096,UMAG_02237,UMAG_02993,UMAG_02081,UMAG_11500,UMAG_05458,UMAG_04550,UMAG_05420,UMAG_03045,UMAG_05132,UMAG_05825,UMAG_01797,UMAG_05038,UMAG_11751,UMAG_10559,UMAG_15056,UMAG_03028,UMAG_02465,UMAG_02316,UMAG_15030,UMAG_04461,UMAG_00227
GO:BP	Depleted	transmembrane transport	GO:0098771	inorganic ion homeostasis	1.16007e-07	65	606	24	UMAG_04923,UMAG_04065,UMAG_02581,UMAG_02730,UMAG_03470,UMAG_02237,UMAG_02081,UMAG_11500,UMAG_04550,UMAG_05979,UMAG_05420,UMAG_04423,UMAG_04602,UMAG_01205,UMAG_03812,UMAG_05132,UMAG_00372,UMAG_05825,UMAG_11751,UMAG_10210,UMAG_00630,UMAG_10559,UMAG_10189,UMAG_02285
GO:BP	Depleted	transmembrane transport	GO:0008643	carbohydrate transport	1.64942e-07	20	907	15	UMAG_05411,UMAG_11514,UMAG_05023,UMAG_01656,UMAG_10608,UMAG_01062,UMAG_11171,UMAG_05972,UMAG_02037,UMAG_10072,UMAG_00061,UMAG_02869,UMAG_05958,UMAG_02374,UMAG_11841
GO:BP	Depleted	transmembrane transport	GO:0055080	cation homeostasis	1.67832e-07	66	606	24	UMAG_04923,UMAG_04065,UMAG_02581,UMAG_02730,UMAG_03470,UMAG_02237,UMAG_02081,UMAG_11500,UMAG_04550,UMAG_05979,UMAG_05420,UMAG_04423,UMAG_04602,UMAG_01205,UMAG_03812,UMAG_05132,UMAG_00372,UMAG_05825,UMAG_11751,UMAG_10210,UMAG_00630,UMAG_10559,UMAG_10189,UMAG_02285
GO:BP	Depleted	transmembrane transport	GO:0050801	ion homeostasis	2.40757e-07	67	606	24	UMAG_04923,UMAG_04065,UMAG_02581,UMAG_02730,UMAG_03470,UMAG_02237,UMAG_02081,UMAG_11500,UMAG_04550,UMAG_05979,UMAG_05420,UMAG_04423,UMAG_04602,UMAG_01205,UMAG_03812,UMAG_05132,UMAG_00372,UMAG_05825,UMAG_11751,UMAG_10210,UMAG_00630,UMAG_10559,UMAG_10189,UMAG_02285
GO:BP	Depleted	transmembrane transport	GO:0019725	cellular homeostasis	3.8937e-07	103	560	29	UMAG_04923,UMAG_04065,UMAG_02581,UMAG_02730,UMAG_03470,UMAG_02568,UMAG_02237,UMAG_02081,UMAG_11500,UMAG_11230,UMAG_04550,UMAG_05979,UMAG_05023,UMAG_05420,UMAG_04423,UMAG_04602,UMAG_01205,UMAG_01802,UMAG_03812,UMAG_05132,UMAG_05435,UMAG_00372,UMAG_05825,UMAG_11751,UMAG_10210,UMAG_00630,UMAG_10559,UMAG_00798,UMAG_10189
GO:BP	Depleted	transmembrane transport	GO:0030003	cellular cation homeostasis	5.17736e-07	64	606	23	UMAG_04923,UMAG_04065,UMAG_02581,UMAG_02730,UMAG_03470,UMAG_02237,UMAG_02081,UMAG_11500,UMAG_04550,UMAG_05979,UMAG_05420,UMAG_04423,UMAG_01205,UMAG_03812,UMAG_05132,UMAG_00372,UMAG_05825,UMAG_11751,UMAG_10210,UMAG_00630,UMAG_10559,UMAG_10189,UMAG_02285
GO:BP	Depleted	transmembrane transport	GO:0006873	cellular ion homeostasis	5.17736e-07	64	606	23	UMAG_04923,UMAG_04065,UMAG_02581,UMAG_02730,UMAG_03470,UMAG_02237,UMAG_02081,UMAG_11500,UMAG_04550,UMAG_05979,UMAG_05420,UMAG_04423,UMAG_01205,UMAG_03812,UMAG_05132,UMAG_00372,UMAG_05825,UMAG_11751,UMAG_10210,UMAG_00630,UMAG_10559,UMAG_10189,UMAG_02285
GO:BP	Depleted	transmembrane transport	GO:1904659	glucose transmembrane transport	6.75194e-07	15	797	12	UMAG_05411,UMAG_11514,UMAG_05023,UMAG_01656,UMAG_10608,UMAG_11171,UMAG_05972,UMAG_02037,UMAG_10072,UMAG_00061,UMAG_05958,UMAG_02374
GO:BP	Depleted	transmembrane transport	GO:0015749	monosaccharide transmembrane transport	6.75194e-07	15	797	12	UMAG_05411,UMAG_11514,UMAG_05023,UMAG_01656,UMAG_10608,UMAG_11171,UMAG_05972,UMAG_02037,UMAG_10072,UMAG_00061,UMAG_05958,UMAG_02374
GO:BP	Depleted	transmembrane transport	GO:0034219	carbohydrate transmembrane transport	6.75194e-07	15	797	12	UMAG_05411,UMAG_11514,UMAG_05023,UMAG_01656,UMAG_10608,UMAG_11171,UMAG_05972,UMAG_02037,UMAG_10072,UMAG_00061,UMAG_05958,UMAG_02374
GO:BP	Depleted	transmembrane transport	GO:0008645	hexose transmembrane transport	6.75194e-07	15	797	12	UMAG_05411,UMAG_11514,UMAG_05023,UMAG_01656,UMAG_10608,UMAG_11171,UMAG_05972,UMAG_02037,UMAG_10072,UMAG_00061,UMAG_05958,UMAG_02374
GO:BP	Depleted	transmembrane transport	GO:0046323	glucose import	6.75194e-07	15	797	12	UMAG_05411,UMAG_11514,UMAG_05023,UMAG_01656,UMAG_10608,UMAG_11171,UMAG_05972,UMAG_02037,UMAG_10072,UMAG_00061,UMAG_05958,UMAG_02374
GO:BP	Depleted	transmembrane transport	GO:0055082	cellular chemical homeostasis	1.78494e-06	73	606	24	UMAG_04923,UMAG_04065,UMAG_02581,UMAG_02730,UMAG_03470,UMAG_02237,UMAG_02081,UMAG_11500,UMAG_04550,UMAG_05979,UMAG_05023,UMAG_05420,UMAG_04423,UMAG_01205,UMAG_03812,UMAG_05132,UMAG_00372,UMAG_05825,UMAG_11751,UMAG_10210,UMAG_00630,UMAG_10559,UMAG_10189,UMAG_02285
GO:BP	Depleted	transmembrane transport	GO:0055065	metal ion homeostasis	2.39409e-06	56	989	26	UMAG_04923,UMAG_04065,UMAG_02730,UMAG_03470,UMAG_02237,UMAG_02081,UMAG_11500,UMAG_04550,UMAG_05979,UMAG_05420,UMAG_04423,UMAG_04602,UMAG_05132,UMAG_00372,UMAG_05825,UMAG_11751,UMAG_10210,UMAG_10559,UMAG_10189,UMAG_02285,UMAG_02395,UMAG_02465,UMAG_00105,UMAG_04461,UMAG_11604,UMAG_05268
GO:BP	Depleted	transmembrane transport	GO:0055074	calcium ion homeostasis	3.11546e-06	19	989	14	UMAG_04923,UMAG_04065,UMAG_03470,UMAG_02237,UMAG_02081,UMAG_04550,UMAG_05132,UMAG_00372,UMAG_05825,UMAG_11751,UMAG_10559,UMAG_02465,UMAG_04461,UMAG_05268
GO:BP	Depleted	transmembrane transport	GO:0006874	cellular calcium ion homeostasis	3.11546e-06	19	989	14	UMAG_04923,UMAG_04065,UMAG_03470,UMAG_02237,UMAG_02081,UMAG_04550,UMAG_05132,UMAG_00372,UMAG_05825,UMAG_11751,UMAG_10559,UMAG_02465,UMAG_04461,UMAG_05268
GO:BP	Depleted	transmembrane transport	GO:1902600	proton transmembrane transport	3.40426e-06	68	797	26	UMAG_05411,UMAG_04771,UMAG_02581,UMAG_11514,UMAG_02081,UMAG_00204,UMAG_05023,UMAG_15043,UMAG_01656,UMAG_10608,UMAG_04319,UMAG_01205,UMAG_10048,UMAG_03876,UMAG_11171,UMAG_03812,UMAG_06148,UMAG_00630,UMAG_02203,UMAG_05972,UMAG_02037,UMAG_02285,UMAG_10072,UMAG_00061,UMAG_05958,UMAG_02374
GO:BP	Depleted	transmembrane transport	GO:0006875	cellular metal ion homeostasis	5.11253e-06	54	989	25	UMAG_04923,UMAG_04065,UMAG_02730,UMAG_03470,UMAG_02237,UMAG_02081,UMAG_11500,UMAG_04550,UMAG_05979,UMAG_05420,UMAG_04423,UMAG_05132,UMAG_00372,UMAG_05825,UMAG_11751,UMAG_10210,UMAG_10559,UMAG_10189,UMAG_02285,UMAG_02395,UMAG_02465,UMAG_00105,UMAG_04461,UMAG_11604,UMAG_05268
GO:BP	Depleted	transmembrane transport	GO:0072503	cellular divalent inorganic cation homeostasis	1.19695e-05	23	989	15	UMAG_04923,UMAG_04065,UMAG_03470,UMAG_02237,UMAG_02081,UMAG_11500,UMAG_04550,UMAG_05132,UMAG_00372,UMAG_05825,UMAG_11751,UMAG_10559,UMAG_02465,UMAG_04461,UMAG_05268
GO:BP	Depleted	transmembrane transport	GO:0072507	divalent inorganic cation homeostasis	1.19695e-05	23	989	15	UMAG_04923,UMAG_04065,UMAG_03470,UMAG_02237,UMAG_02081,UMAG_11500,UMAG_04550,UMAG_05132,UMAG_00372,UMAG_05825,UMAG_11751,UMAG_10559,UMAG_02465,UMAG_04461,UMAG_05268
GO:BP	Depleted	transmembrane transport	GO:0048878	chemical homeostasis	4.63103e-05	91	560	24	UMAG_04923,UMAG_04065,UMAG_02581,UMAG_02730,UMAG_03470,UMAG_02237,UMAG_02081,UMAG_11500,UMAG_04550,UMAG_05979,UMAG_05023,UMAG_05420,UMAG_04423,UMAG_04602,UMAG_01205,UMAG_03812,UMAG_05132,UMAG_00372,UMAG_05825,UMAG_11751,UMAG_10210,UMAG_00630,UMAG_10559,UMAG_10189
GO:BP	Depleted	transmembrane transport	GO:0098656	anion transmembrane transport	0.000104884	152	1070	48	UMAG_05411,UMAG_04347,UMAG_05122,UMAG_12169,UMAG_00343,UMAG_11514,UMAG_02568,UMAG_11829,UMAG_10195,UMAG_05023,UMAG_01656,UMAG_10378,UMAG_10608,UMAG_01062,UMAG_04602,UMAG_06138,UMAG_02221,UMAG_03876,UMAG_11171,UMAG_00068,UMAG_03700,UMAG_03812,UMAG_02459,UMAG_01882,UMAG_05968,UMAG_06093,UMAG_10814,UMAG_05972,UMAG_02037,UMAG_01964,UMAG_03325,UMAG_10072,UMAG_04060,UMAG_00061,UMAG_06175,UMAG_01868,UMA…
GO:BP	Depleted	transmembrane transport	GO:0006816	calcium ion transport	0.000168702	19	543	10	UMAG_03470,UMAG_02237,UMAG_02081,UMAG_05458,UMAG_04550,UMAG_05132,UMAG_05825,UMAG_05038,UMAG_11751,UMAG_10559
GO:BP	Depleted	transmembrane transport	GO:0065008	regulation of biological quality	0.000479484	243	560	42	UMAG_04923,UMAG_04065,UMAG_10570,UMAG_02581,UMAG_02730,UMAG_03470,UMAG_05194,UMAG_04031,UMAG_02568,UMAG_02237,UMAG_02081,UMAG_11500,UMAG_11230,UMAG_10478,UMAG_04550,UMAG_12062,UMAG_05979,UMAG_05023,UMAG_05420,UMAG_02436,UMAG_10648,UMAG_11715,UMAG_04423,UMAG_04602,UMAG_01205,UMAG_01802,UMAG_01169,UMAG_03293,UMAG_02433,UMAG_03812,UMAG_03771,UMAG_05132,UMAG_05435,UMAG_00372,UMAG_04394,UMAG_05825,UMA…
GO:BP	Depleted	transmembrane transport	GO:0070588	calcium ion transmembrane transport	0.000632435	17	543	9	UMAG_03470,UMAG_02237,UMAG_02081,UMAG_04550,UMAG_05132,UMAG_05825,UMAG_05038,UMAG_11751,UMAG_10559
GO:BP	Depleted	transmembrane transport	GO:0042592	homeostatic process	0.001095	144	560	29	UMAG_04923,UMAG_04065,UMAG_02581,UMAG_02730,UMAG_03470,UMAG_02568,UMAG_02237,UMAG_02081,UMAG_11500,UMAG_11230,UMAG_04550,UMAG_05979,UMAG_05023,UMAG_05420,UMAG_04423,UMAG_04602,UMAG_01205,UMAG_01802,UMAG_03812,UMAG_05132,UMAG_05435,UMAG_00372,UMAG_05825,UMAG_11751,UMAG_10210,UMAG_00630,UMAG_10559,UMAG_00798,UMAG_10189
GO:BP	Depleted	transmembrane transport	GO:0098657	import into cell	0.00155211	14	1055	10	UMAG_02730,UMAG_04423,UMAG_04602,UMAG_02037,UMAG_10072,UMAG_02395,UMAG_02465,UMAG_00105,UMAG_11604,UMAG_11172
GO:BP	Depleted	transmembrane transport	GO:0006865	amino acid transport	0.0148332	40	1070	17	UMAG_00343,UMAG_02154,UMAG_10378,UMAG_02221,UMAG_00068,UMAG_03700,UMAG_02459,UMAG_01882,UMAG_11272,UMAG_10814,UMAG_01964,UMAG_03325,UMAG_00056,UMAG_02146,UMAG_11954,UMAG_10906,UMAG_00679
GO:BP	Depleted	transmembrane transport	GO:0000041	transition metal ion transport	0.0336347	30	962	13	UMAG_02730,UMAG_00096,UMAG_11500,UMAG_05979,UMAG_05420,UMAG_01429,UMAG_10210,UMAG_15056,UMAG_02395,UMAG_00105,UMAG_04461,UMAG_11604,UMAG_00227
GO:BP	Depleted	transmembrane transport	GO:0055067	monovalent inorganic cation homeostasis	0.0343654	14	606	7	UMAG_02581,UMAG_04423,UMAG_04602,UMAG_01205,UMAG_03812,UMAG_00630,UMAG_02285
GO:BP	Depleted	transmembrane transport	GO:1990822	basic amino acid transmembrane transport	0.0409216	5	1070	5	UMAG_02221,UMAG_01882,UMAG_10814,UMAG_01964,UMAG_00679
GO:BP	Depleted	transmembrane transport	GO:0140115	export across plasma membrane	0.0480396	3	321	3	UMAG_02581,UMAG_06009,UMAG_01205
GO:BP	Depleted	cell wall organization & biogenesis	GO:0071554	cell wall organization or biogenesis	4.07564e-10	65	839	31	UMAG_05809,UMAG_05811,UMAG_10367,UMAG_04171,UMAG_03924,UMAG_05480,UMAG_10277,UMAG_00480,UMAG_05718,UMAG_10940,UMAG_10320,UMAG_01640,UMAG_15051,UMAG_03204,UMAG_03569,UMAG_11927,UMAG_11089,UMAG_03411,UMAG_10975,UMAG_11220,UMAG_06078,UMAG_05433,UMAG_06133,UMAG_00857,UMAG_15089,UMAG_10761,UMAG_10426,UMAG_12233,UMAG_11349,UMAG_05704,UMAG_05736
GO:BP	Depleted	cell wall organization & biogenesis	GO:0045229	external encapsulating structure organization	1.16871e-07	39	839	21	UMAG_05809,UMAG_05811,UMAG_10367,UMAG_03924,UMAG_05480,UMAG_10277,UMAG_00480,UMAG_05718,UMAG_10320,UMAG_01640,UMAG_15051,UMAG_03204,UMAG_03569,UMAG_11220,UMAG_06078,UMAG_05433,UMAG_06133,UMAG_00857,UMAG_12233,UMAG_11349,UMAG_05736
GO:BP	Depleted	cell wall organization & biogenesis	GO:0071555	cell wall organization	1.16871e-07	39	839	21	UMAG_05809,UMAG_05811,UMAG_10367,UMAG_03924,UMAG_05480,UMAG_10277,UMAG_00480,UMAG_05718,UMAG_10320,UMAG_01640,UMAG_15051,UMAG_03204,UMAG_03569,UMAG_11220,UMAG_06078,UMAG_05433,UMAG_06133,UMAG_00857,UMAG_12233,UMAG_11349,UMAG_05736
GO:BP	Depleted	cell wall organization & biogenesis	GO:0071852	fungal-type cell wall organization or biogenesis	8.4752e-07	46	839	22	UMAG_05809,UMAG_05811,UMAG_04171,UMAG_00480,UMAG_05718,UMAG_10940,UMAG_10320,UMAG_01640,UMAG_15051,UMAG_03569,UMAG_11927,UMAG_11089,UMAG_10975,UMAG_11220,UMAG_05433,UMAG_00857,UMAG_15089,UMAG_10761,UMAG_10426,UMAG_11349,UMAG_05704,UMAG_05736
GO:BP	Depleted	cell wall organization & biogenesis	GO:0051273	beta-glucan metabolic process	1.85237e-05	15	289	8	UMAG_05809,UMAG_01639,UMAG_05811,UMAG_05718,UMAG_00655,UMAG_01640,UMAG_15051,UMAG_03569
GO:BP	Depleted	cell wall organization & biogenesis	GO:0051274	beta-glucan biosynthetic process	2.65131e-05	11	289	7	UMAG_05809,UMAG_01639,UMAG_05811,UMAG_05718,UMAG_01640,UMAG_15051,UMAG_03569
GO:BP	Depleted	cell wall organization & biogenesis	GO:0044264	cellular polysaccharide metabolic process	0.00012441	44	443	14	UMAG_05809,UMAG_01639,UMAG_05811,UMAG_06102,UMAG_05718,UMAG_00655,UMAG_01640,UMAG_15051,UMAG_03569,UMAG_10211,UMAG_03411,UMAG_10975,UMAG_00235,UMAG_15009
GO:BP	Depleted	cell wall organization & biogenesis	GO:0006073	cellular glucan metabolic process	0.000255985	34	443	12	UMAG_05809,UMAG_01639,UMAG_05811,UMAG_06102,UMAG_05718,UMAG_00655,UMAG_01640,UMAG_15051,UMAG_03569,UMAG_10211,UMAG_00235,UMAG_15009
GO:BP	Depleted	cell wall organization & biogenesis	GO:0044042	glucan metabolic process	0.000353142	41	443	13	UMAG_05809,UMAG_01639,UMAG_05811,UMAG_06102,UMAG_05718,UMAG_00655,UMAG_01640,UMAG_15051,UMAG_03569,UMAG_00446,UMAG_10211,UMAG_00235,UMAG_15009
GO:BP	Depleted	cell wall organization & biogenesis	GO:0005976	polysaccharide metabolic process	0.00243762	64	676	19	UMAG_05809,UMAG_01639,UMAG_05811,UMAG_06102,UMAG_05718,UMAG_00655,UMAG_01640,UMAG_15051,UMAG_03569,UMAG_00446,UMAG_10211,UMAG_03411,UMAG_10975,UMAG_00235,UMAG_15009,UMAG_02134,UMAG_00857,UMAG_15089,UMAG_12233
GO:BP	Depleted	cell wall organization & biogenesis	GO:0006077	(1->6)-beta-D-glucan metabolic process	0.00289898	8	289	5	UMAG_05809,UMAG_05811,UMAG_05718,UMAG_15051,UMAG_03569
GO:BP	Depleted	cell wall organization & biogenesis	GO:0006078	(1->6)-beta-D-glucan biosynthetic process	0.00289898	8	289	5	UMAG_05809,UMAG_05811,UMAG_05718,UMAG_15051,UMAG_03569
GO:BP	Depleted	cell wall organization & biogenesis	GO:0009250	glucan biosynthetic process	0.00304766	19	289	7	UMAG_05809,UMAG_01639,UMAG_05811,UMAG_05718,UMAG_01640,UMAG_15051,UMAG_03569
GO:BP	Depleted	cell wall organization & biogenesis	GO:0031505	fungal-type cell wall organization	0.00485191	29	839	13	UMAG_05809,UMAG_05811,UMAG_00480,UMAG_05718,UMAG_10320,UMAG_01640,UMAG_15051,UMAG_03569,UMAG_11220,UMAG_05433,UMAG_00857,UMAG_11349,UMAG_05736
GO:BP	Depleted	cell wall organization & biogenesis	GO:0033692	cellular polysaccharide biosynthetic process	0.00655231	21	289	7	UMAG_05809,UMAG_01639,UMAG_05811,UMAG_05718,UMAG_01640,UMAG_15051,UMAG_03569
GO:BP	Depleted	cell wall organization & biogenesis	GO:0000271	polysaccharide biosynthetic process	0.00655231	21	289	7	UMAG_05809,UMAG_01639,UMAG_05811,UMAG_05718,UMAG_01640,UMAG_15051,UMAG_03569
GO:BP	Depleted	cell wall organization & biogenesis	GO:0005975	carbohydrate metabolic process	0.0109586	205	460	30	UMAG_01788,UMAG_05809,UMAG_11922,UMAG_01639,UMAG_05811,UMAG_06102,UMAG_04357,UMAG_04354,UMAG_00638,UMAG_05229,UMAG_03122,UMAG_05718,UMAG_02381,UMAG_00655,UMAG_01640,UMAG_15051,UMAG_00695,UMAG_03569,UMAG_02740,UMAG_00446,UMAG_10211,UMAG_03411,UMAG_10000,UMAG_10975,UMAG_11723,UMAG_05787,UMAG_00235,UMAG_04405,UMAG_15009,UMAG_06078
GO:BP	Depleted	cell wall organization & biogenesis	GO:0009272	fungal-type cell wall biogenesis	0.0287391	13	648	7	UMAG_04171,UMAG_10940,UMAG_01640,UMAG_11927,UMAG_11089,UMAG_10761,UMAG_10426
GO:BP	Depleted	cell wall organization & biogenesis	GO:0034637	cellular carbohydrate biosynthetic process	0.0404817	27	289	7	UMAG_05809,UMAG_01639,UMAG_05811,UMAG_05718,UMAG_01640,UMAG_15051,UMAG_03569
GO:BP	Depleted	protein glycosylation	GO:0070085	glycosylation	2.66472e-05	63	757	23	UMAG_06205,UMAG_04171,UMAG_10940,UMAG_15072,UMAG_01512,UMAG_01062,UMAG_10749,UMAG_11927,UMAG_02433,UMAG_11220,UMAG_11723,UMAG_06295,UMAG_04994,UMAG_04649,UMAG_05433,UMAG_05209,UMAG_05293,UMAG_11347,UMAG_06088,UMAG_04198,UMAG_12181,UMAG_05769,UMAG_03658
GO:BP	Depleted	protein glycosylation	GO:0009100	glycoprotein metabolic process	5.21915e-05	65	757	23	UMAG_06205,UMAG_04171,UMAG_05229,UMAG_10940,UMAG_10494,UMAG_01512,UMAG_01062,UMAG_10749,UMAG_11927,UMAG_02433,UMAG_11220,UMAG_11723,UMAG_05787,UMAG_04994,UMAG_04649,UMAG_05433,UMAG_05209,UMAG_05293,UMAG_06088,UMAG_04198,UMAG_12181,UMAG_05769,UMAG_03658
GO:BP	Depleted	protein glycosylation	GO:0097502	mannosylation	7.69021e-05	28	611	13	UMAG_06205,UMAG_04171,UMAG_10940,UMAG_15072,UMAG_10749,UMAG_11927,UMAG_11220,UMAG_06295,UMAG_04649,UMAG_05433,UMAG_05209,UMAG_11347,UMAG_06088
GO:BP	Depleted	protein glycosylation	GO:0006486	protein glycosylation	0.000106002	53	757	20	UMAG_06205,UMAG_04171,UMAG_10940,UMAG_01512,UMAG_01062,UMAG_10749,UMAG_11927,UMAG_02433,UMAG_11220,UMAG_11723,UMAG_04994,UMAG_04649,UMAG_05433,UMAG_05209,UMAG_05293,UMAG_06088,UMAG_04198,UMAG_12181,UMAG_05769,UMAG_03658
GO:BP	Depleted	protein glycosylation	GO:0043413	macromolecule glycosylation	0.000106002	53	757	20	UMAG_06205,UMAG_04171,UMAG_10940,UMAG_01512,UMAG_01062,UMAG_10749,UMAG_11927,UMAG_02433,UMAG_11220,UMAG_11723,UMAG_04994,UMAG_04649,UMAG_05433,UMAG_05209,UMAG_05293,UMAG_06088,UMAG_04198,UMAG_12181,UMAG_05769,UMAG_03658
GO:BP	Depleted	protein glycosylation	GO:0009101	glycoprotein biosynthetic process	0.000151657	54	757	20	UMAG_06205,UMAG_04171,UMAG_10940,UMAG_01512,UMAG_01062,UMAG_10749,UMAG_11927,UMAG_02433,UMAG_11220,UMAG_11723,UMAG_04994,UMAG_04649,UMAG_05433,UMAG_05209,UMAG_05293,UMAG_06088,UMAG_04198,UMAG_12181,UMAG_05769,UMAG_03658
GO:BP	Depleted	protein glycosylation	GO:0035269	protein O-linked mannosylation	0.00501486	9	511	6	UMAG_04171,UMAG_10940,UMAG_10749,UMAG_11927,UMAG_11220,UMAG_05433
GO:BP	Depleted	protein glycosylation	GO:1901137	carbohydrate derivative biosynthetic process	0.00833227	172	716	36	UMAG_06205,UMAG_02581,UMAG_04171,UMAG_03469,UMAG_10940,UMAG_15072,UMAG_10320,UMAG_05232,UMAG_01512,UMAG_01062,UMAG_10749,UMAG_11927,UMAG_11089,UMAG_01205,UMAG_00454,UMAG_02433,UMAG_04859,UMAG_03413,UMAG_11220,UMAG_11723,UMAG_06295,UMAG_04496,UMAG_04994,UMAG_04649,UMAG_05433,UMAG_05209,UMAG_11784,UMAG_01565,UMAG_05293,UMAG_11347,UMAG_06088,UMAG_02286,UMAG_02731,UMAG_04198,UMAG_12181,UMAG_05769
GO:BP	Depleted	protein glycosylation	GO:0035268	protein mannosylation	0.0117706	10	511	6	UMAG_04171,UMAG_10940,UMAG_10749,UMAG_11927,UMAG_11220,UMAG_05433
GO:BP	Depleted	protein glycosylation	GO:0018196	peptidyl-asparagine modification	0.0300354	6	716	5	UMAG_01512,UMAG_04994,UMAG_05293,UMAG_04198,UMAG_05769
GO:BP	Depleted	protein glycosylation	GO:0018279	protein N-linked glycosylation via asparagine	0.0300354	6	716	5	UMAG_01512,UMAG_04994,UMAG_05293,UMAG_04198,UMAG_05769
GO:BP	Depleted	glycolipid metabolic process	GO:0006664	glycolipid metabolic process	0.00020731	31	698	14	UMAG_04357,UMAG_04031,UMAG_03469,UMAG_15072,UMAG_10320,UMAG_00454,UMAG_04859,UMAG_06295,UMAG_04496,UMAG_11784,UMAG_01565,UMAG_11347,UMAG_02286,UMAG_02731
GO:BP	Depleted	glycolipid metabolic process	GO:1903509	liposaccharide metabolic process	0.00020731	31	698	14	UMAG_04357,UMAG_04031,UMAG_03469,UMAG_15072,UMAG_10320,UMAG_00454,UMAG_04859,UMAG_06295,UMAG_04496,UMAG_11784,UMAG_01565,UMAG_11347,UMAG_02286,UMAG_02731
GO:BP	Depleted	glycolipid metabolic process	GO:0009247	glycolipid biosynthetic process	0.00175917	27	698	12	UMAG_03469,UMAG_15072,UMAG_10320,UMAG_00454,UMAG_04859,UMAG_06295,UMAG_04496,UMAG_11784,UMAG_01565,UMAG_11347,UMAG_02286,UMAG_02731
GO:BP	Depleted	glycolipid metabolic process	GO:0006505	GPI anchor metabolic process	0.00512532	25	698	11	UMAG_04031,UMAG_03469,UMAG_10320,UMAG_00454,UMAG_04859,UMAG_06295,UMAG_11784,UMAG_01565,UMAG_11347,UMAG_02286,UMAG_02731
GO:BP	Depleted	glycolipid metabolic process	GO:0008610	lipid biosynthetic process	0.00991449	152	656	31	UMAG_00955,UMAG_01230,UMAG_04095,UMAG_03469,UMAG_15072,UMAG_10320,UMAG_11962,UMAG_10339,UMAG_01498,UMAG_00454,UMAG_15002,UMAG_01407,UMAG_04859,UMAG_05880,UMAG_04029,UMAG_03647,UMAG_11819,UMAG_06295,UMAG_15001,UMAG_02799,UMAG_04496,UMAG_10624,UMAG_11784,UMAG_06273,UMAG_03662,UMAG_01565,UMAG_02266,UMAG_11347,UMAG_11014,UMAG_04590,UMAG_02286
GO:BP	Depleted	glycolipid metabolic process	GO:0006506	GPI anchor biosynthetic process	0.0233544	24	698	10	UMAG_03469,UMAG_10320,UMAG_00454,UMAG_04859,UMAG_06295,UMAG_11784,UMAG_01565,UMAG_11347,UMAG_02286,UMAG_02731
GO:BP	Depleted	glycolipid metabolic process	GO:0006497	protein lipidation	0.0283159	39	698	13	UMAG_03469,UMAG_10320,UMAG_01084,UMAG_00454,UMAG_04859,UMAG_02224,UMAG_06295,UMAG_11784,UMAG_04250,UMAG_01565,UMAG_11347,UMAG_02286,UMAG_02731
GO:BP	Depleted	glycolipid metabolic process	GO:0042158	lipoprotein biosynthetic process	0.0283159	39	698	13	UMAG_03469,UMAG_10320,UMAG_01084,UMAG_00454,UMAG_04859,UMAG_02224,UMAG_06295,UMAG_11784,UMAG_04250,UMAG_01565,UMAG_11347,UMAG_02286,UMAG_02731
GO:BP	Depleted	glycolipid metabolic process	GO:0006629	lipid metabolic process	0.0421333	291	669	48	UMAG_00955,UMAG_01230,UMAG_04357,UMAG_04095,UMAG_03436,UMAG_04031,UMAG_03469,UMAG_15072,UMAG_10320,UMAG_02576,UMAG_11962,UMAG_02489,UMAG_03597,UMAG_10339,UMAG_00790,UMAG_01498,UMAG_06487,UMAG_00454,UMAG_15002,UMAG_11270,UMAG_01407,UMAG_02433,UMAG_04859,UMAG_05880,UMAG_03809,UMAG_10421,UMAG_04029,UMAG_03647,UMAG_11819,UMAG_06295,UMAG_15001,UMAG_02799,UMAG_04496,UMAG_10624,UMAG_05209,UMAG_11784,UMA…
GO:BP	Depleted	glycolipid metabolic process	GO:0008654	phospholipid biosynthetic process	0.0456757	69	698	18	UMAG_01230,UMAG_03469,UMAG_15072,UMAG_10320,UMAG_00454,UMAG_01407,UMAG_04859,UMAG_06295,UMAG_15001,UMAG_02799,UMAG_11784,UMAG_01565,UMAG_02266,UMAG_11347,UMAG_11014,UMAG_04590,UMAG_02286,UMAG_02731
GO:BP	Depleted	lipid transport	GO:0006869	lipid transport	0.000588752	35	556	13	UMAG_02161,UMAG_00757,UMAG_04796,UMAG_02436,UMAG_10648,UMAG_02221,UMAG_01169,UMAG_03293,UMAG_02433,UMAG_04817,UMAG_04394,UMAG_03016,UMAG_03454
GO:BP	Depleted	lipid transport	GO:0034204	lipid translocation	0.0010072	8	464	6	UMAG_02436,UMAG_10648,UMAG_01169,UMAG_03293,UMAG_02433,UMAG_04394
GO:BP	Depleted	lipid transport	GO:0097035	regulation of membrane lipid distribution	0.0028538	9	464	6	UMAG_02436,UMAG_10648,UMAG_01169,UMAG_03293,UMAG_02433,UMAG_04394
GO:BP	Depleted	lipid transport	GO:0010876	lipid localization	0.00431798	41	645	14	UMAG_02161,UMAG_00757,UMAG_04796,UMAG_02436,UMAG_10648,UMAG_02221,UMAG_01169,UMAG_03293,UMAG_02433,UMAG_04817,UMAG_04394,UMAG_03016,UMAG_03454,UMAG_06049
GO:BP	Depleted	lipid transport	GO:0045332	phospholipid translocation	0.0116448	7	464	5	UMAG_02436,UMAG_10648,UMAG_01169,UMAG_03293,UMAG_04394
GO:BP	Depleted	ERAD pathway	GO:0036503	ERAD pathway	0.00609392	32	531	11	UMAG_04031,UMAG_15034,UMAG_10911,UMAG_10494,UMAG_01512,UMAG_04531,UMAG_10749,UMAG_01940,UMAG_00542,UMAG_11402,UMAG_05800
GO:BP	Depleted	ERAD pathway	GO:0034976	response to endoplasmic reticulum stress	0.0118367	40	531	12	UMAG_04031,UMAG_15034,UMAG_10911,UMAG_03841,UMAG_10494,UMAG_01512,UMAG_04531,UMAG_10749,UMAG_01940,UMAG_00542,UMAG_11402,UMAG_05800
GO:BP	Depleted	ERAD pathway	GO:0042221	response to chemical	0.0496185	188	545	30	UMAG_00696,UMAG_04031,UMAG_02568,UMAG_15034,UMAG_00480,UMAG_10911,UMAG_02585,UMAG_00904,UMAG_03841,UMAG_03888,UMAG_06391,UMAG_05023,UMAG_10494,UMAG_03156,UMAG_06009,UMAG_01512,UMAG_04531,UMAG_10749,UMAG_01940,UMAG_11777,UMAG_01597,UMAG_05435,UMAG_04394,UMAG_00239,UMAG_11047,UMAG_00542,UMAG_11402,UMAG_00034,UMAG_05800,UMAG_02291
GO:BP	Depleted	ER organization	GO:0007029	endoplasmic reticulum organization	0.00130111	18	928	11	UMAG_02161,UMAG_11627,UMAG_04796,UMAG_04817,UMAG_11541,UMAG_03016,UMAG_10017,UMAG_05446,UMAG_02736,UMAG_04463,UMAG_11289
GO:BP	Depleted	phosphorelay signal transduction	GO:0000160	phosphorelay signal transduction system	0.0484235	12	1101	8	UMAG_00239,UMAG_11677,UMAG_15017,UMAG_03346,UMAG_04907,UMAG_05732,UMAG_02739,UMAG_11957
GO:CC	Depleted	ER membrane	GO:0098827	endoplasmic reticulum subcompartment	4.17466e-21	207	716	73	UMAG_05809,UMAG_06205,UMAG_00955,UMAG_11627,UMAG_05811,UMAG_02396,UMAG_01230,UMAG_04171,UMAG_04031,UMAG_15034,UMAG_05718,UMAG_03469,UMAG_10940,UMAG_10195,UMAG_10911,UMAG_03841,UMAG_12062,UMAG_10160,UMAG_00646,UMAG_05232,UMAG_02576,UMAG_11962,UMAG_15051,UMAG_03569,UMAG_01062,UMAG_04531,UMAG_10749,UMAG_11927,UMAG_11089,UMAG_01940,UMAG_15029,UMAG_01498,UMAG_00454,UMAG_15002,UMAG_02433,UMAG_04859,UMA…
GO:CC	Depleted	ER membrane	GO:0005789	endoplasmic reticulum membrane	3.03192e-20	203	716	71	UMAG_05809,UMAG_06205,UMAG_00955,UMAG_11627,UMAG_05811,UMAG_02396,UMAG_01230,UMAG_04171,UMAG_04031,UMAG_05718,UMAG_03469,UMAG_10940,UMAG_10195,UMAG_10911,UMAG_03841,UMAG_12062,UMAG_10160,UMAG_00646,UMAG_05232,UMAG_02576,UMAG_11962,UMAG_15051,UMAG_03569,UMAG_01062,UMAG_04531,UMAG_10749,UMAG_11927,UMAG_11089,UMAG_01940,UMAG_15029,UMAG_01498,UMAG_00454,UMAG_15002,UMAG_02433,UMAG_04859,UMAG_11220,UMA…
GO:CC	Depleted	ER membrane	GO:0031984	organelle subcompartment	5.83049e-20	273	716	84	UMAG_05809,UMAG_06205,UMAG_00955,UMAG_11627,UMAG_05811,UMAG_02396,UMAG_01230,UMAG_04171,UMAG_10400,UMAG_04031,UMAG_15034,UMAG_05718,UMAG_03469,UMAG_11829,UMAG_10940,UMAG_10195,UMAG_10911,UMAG_10478,UMAG_15072,UMAG_03841,UMAG_12062,UMAG_10160,UMAG_10494,UMAG_00646,UMAG_05232,UMAG_02576,UMAG_11962,UMAG_02436,UMAG_15051,UMAG_03569,UMAG_01062,UMAG_04531,UMAG_10749,UMAG_11927,UMAG_11089,UMAG_01940,UMA…
GO:CC	Depleted	ER membrane	GO:0042175	nuclear outer membrane-endoplasmic reticulum membrane network	5.85985e-20	205	716	71	UMAG_05809,UMAG_06205,UMAG_00955,UMAG_11627,UMAG_05811,UMAG_02396,UMAG_01230,UMAG_04171,UMAG_04031,UMAG_05718,UMAG_03469,UMAG_10940,UMAG_10195,UMAG_10911,UMAG_03841,UMAG_12062,UMAG_10160,UMAG_00646,UMAG_05232,UMAG_02576,UMAG_11962,UMAG_15051,UMAG_03569,UMAG_01062,UMAG_04531,UMAG_10749,UMAG_11927,UMAG_11089,UMAG_01940,UMAG_15029,UMAG_01498,UMAG_00454,UMAG_15002,UMAG_02433,UMAG_04859,UMAG_11220,UMA…
GO:CC	Depleted	ER membrane	GO:0005783	endoplasmic reticulum	6.50028e-20	301	716	89	UMAG_05809,UMAG_06205,UMAG_00955,UMAG_11627,UMAG_05811,UMAG_02396,UMAG_01230,UMAG_04171,UMAG_04031,UMAG_15034,UMAG_05718,UMAG_03469,UMAG_10940,UMAG_10195,UMAG_00757,UMAG_10911,UMAG_10478,UMAG_00904,UMAG_03841,UMAG_12062,UMAG_10160,UMAG_10320,UMAG_10494,UMAG_00646,UMAG_05232,UMAG_02576,UMAG_11962,UMAG_15051,UMAG_01512,UMAG_01084,UMAG_03569,UMAG_01062,UMAG_04531,UMAG_10749,UMAG_11927,UMAG_11089,UMA…
GO:CC	Depleted	ER membrane	GO:0031227	intrinsic component of endoplasmic reticulum membrane	4.95721e-09	61	978	30	UMAG_05809,UMAG_06205,UMAG_00955,UMAG_05811,UMAG_05718,UMAG_10911,UMAG_10160,UMAG_11962,UMAG_15051,UMAG_03569,UMAG_01940,UMAG_01498,UMAG_04859,UMAG_11402,UMAG_05800,UMAG_11272,UMAG_01565,UMAG_10017,UMAG_11014,UMAG_00857,UMAG_06049,UMAG_05898,UMAG_02731,UMAG_03640,UMAG_12133,UMAG_00007,UMAG_11841,UMAG_11289,UMAG_04779,UMAG_10906
GO:CC	Depleted	ER membrane	GO:0030176	integral component of endoplasmic reticulum membrane	1.80923e-08	60	978	29	UMAG_05809,UMAG_06205,UMAG_00955,UMAG_05811,UMAG_05718,UMAG_10911,UMAG_10160,UMAG_11962,UMAG_15051,UMAG_03569,UMAG_01940,UMAG_01498,UMAG_11402,UMAG_05800,UMAG_11272,UMAG_01565,UMAG_10017,UMAG_11014,UMAG_00857,UMAG_06049,UMAG_05898,UMAG_02731,UMAG_03640,UMAG_12133,UMAG_00007,UMAG_11841,UMAG_11289,UMAG_04779,UMAG_10906
GO:CC	Depleted	ER membrane	GO:0140534	endoplasmic reticulum protein-containing complex	1.30244e-06	66	716	24	UMAG_06205,UMAG_11627,UMAG_15034,UMAG_10195,UMAG_00904,UMAG_03841,UMAG_10160,UMAG_10749,UMAG_01940,UMAG_15029,UMAG_11220,UMAG_00542,UMAG_11402,UMAG_10624,UMAG_04994,UMAG_11784,UMAG_01565,UMAG_05293,UMAG_11347,UMAG_05898,UMAG_02731,UMAG_06175,UMAG_04198,UMAG_05769
GO:CC	Depleted	ER membrane	GO:0031300	intrinsic component of organelle membrane	0.00248535	139	978	38	UMAG_00477,UMAG_05809,UMAG_06205,UMAG_00955,UMAG_05811,UMAG_03470,UMAG_05718,UMAG_10911,UMAG_10478,UMAG_10160,UMAG_11962,UMAG_15051,UMAG_03569,UMAG_06200,UMAG_01940,UMAG_01498,UMAG_04859,UMAG_05442,UMAG_11402,UMAG_05800,UMAG_06093,UMAG_11272,UMAG_01565,UMAG_10814,UMAG_10017,UMAG_11014,UMAG_00857,UMAG_06049,UMAG_05898,UMAG_02731,UMAG_03640,UMAG_01564,UMAG_12133,UMAG_00007,UMAG_11841,UMAG_11289,UMA…
GO:CC	Depleted	ER membrane	GO:0031301	integral component of organelle membrane	0.00300431	135	978	37	UMAG_00477,UMAG_05809,UMAG_06205,UMAG_00955,UMAG_05811,UMAG_03470,UMAG_05718,UMAG_10911,UMAG_10478,UMAG_10160,UMAG_11962,UMAG_15051,UMAG_03569,UMAG_06200,UMAG_01940,UMAG_01498,UMAG_05442,UMAG_11402,UMAG_05800,UMAG_06093,UMAG_11272,UMAG_01565,UMAG_10814,UMAG_10017,UMAG_11014,UMAG_00857,UMAG_06049,UMAG_05898,UMAG_02731,UMAG_03640,UMAG_01564,UMAG_12133,UMAG_00007,UMAG_11841,UMAG_11289,UMAG_04779,UMA…
GO:CC	Depleted	vacuole	GO:0000323	lytic vacuole	2.9051e-07	96	633	29	UMAG_10365,UMAG_00477,UMAG_05794,UMAG_15074,UMAG_03861,UMAG_03470,UMAG_02568,UMAG_05229,UMAG_11500,UMAG_10195,UMAG_10478,UMAG_06009,UMAG_02221,UMAG_01805,UMAG_03812,UMAG_05442,UMAG_04926,UMAG_05132,UMAG_01882,UMAG_05435,UMAG_05825,UMAG_00630,UMAG_03975,UMAG_02291,UMAG_12148,UMAG_10814,UMAG_10574,UMAG_01964,UMAG_05897
GO:CC	Depleted	vacuole	GO:0005773	vacuole	4.20776e-07	115	633	32	UMAG_10365,UMAG_00477,UMAG_05794,UMAG_15074,UMAG_03861,UMAG_02686,UMAG_03470,UMAG_02568,UMAG_05229,UMAG_11500,UMAG_10195,UMAG_10478,UMAG_06009,UMAG_02221,UMAG_01805,UMAG_03812,UMAG_05442,UMAG_04926,UMAG_05132,UMAG_01882,UMAG_05435,UMAG_05825,UMAG_00630,UMAG_03975,UMAG_02291,UMAG_12148,UMAG_10528,UMAG_10814,UMAG_10574,UMAG_02356,UMAG_01964,UMAG_05897
GO:CC	Depleted	vacuole	GO:0000324	fungal-type vacuole	7.19626e-07	88	633	27	UMAG_10365,UMAG_00477,UMAG_05794,UMAG_15074,UMAG_03861,UMAG_03470,UMAG_02568,UMAG_11500,UMAG_10195,UMAG_10478,UMAG_06009,UMAG_02221,UMAG_03812,UMAG_05442,UMAG_04926,UMAG_05132,UMAG_01882,UMAG_05435,UMAG_05825,UMAG_00630,UMAG_03975,UMAG_02291,UMAG_12148,UMAG_10814,UMAG_10574,UMAG_01964,UMAG_05897
GO:CC	Depleted	vacuole	GO:0000322	storage vacuole	7.19626e-07	88	633	27	UMAG_10365,UMAG_00477,UMAG_05794,UMAG_15074,UMAG_03861,UMAG_03470,UMAG_02568,UMAG_11500,UMAG_10195,UMAG_10478,UMAG_06009,UMAG_02221,UMAG_03812,UMAG_05442,UMAG_04926,UMAG_05132,UMAG_01882,UMAG_05435,UMAG_05825,UMAG_00630,UMAG_03975,UMAG_02291,UMAG_12148,UMAG_10814,UMAG_10574,UMAG_01964,UMAG_05897
GO:CC	Depleted	vacuole	GO:0000329	fungal-type vacuole membrane	0.00386583	58	627	16	UMAG_10365,UMAG_00477,UMAG_03861,UMAG_03470,UMAG_02568,UMAG_02221,UMAG_03812,UMAG_05442,UMAG_05132,UMAG_01882,UMAG_05825,UMAG_00630,UMAG_12148,UMAG_10814,UMAG_10574,UMAG_01964
GO:CC	Depleted	vacuole	GO:0098852	lytic vacuole membrane	0.00487565	59	627	16	UMAG_10365,UMAG_00477,UMAG_03861,UMAG_03470,UMAG_02568,UMAG_02221,UMAG_03812,UMAG_05442,UMAG_05132,UMAG_01882,UMAG_05825,UMAG_00630,UMAG_12148,UMAG_10814,UMAG_10574,UMAG_01964
GO:CC	Depleted	vacuole	GO:0005774	vacuolar membrane	0.00791091	74	627	18	UMAG_10365,UMAG_00477,UMAG_03861,UMAG_02686,UMAG_03470,UMAG_02568,UMAG_02221,UMAG_03812,UMAG_05442,UMAG_05132,UMAG_01882,UMAG_05825,UMAG_00630,UMAG_12148,UMAG_10528,UMAG_10814,UMAG_10574,UMAG_01964
GO:CC	Depleted	plasma membrane	GO:0005886	plasma membrane	1.36718e-16	252	754	77	UMAG_10606,UMAG_00371,UMAG_05809,UMAG_00696,UMAG_04347,UMAG_01639,UMAG_05811,UMAG_02598,UMAG_10367,UMAG_02581,UMAG_02730,UMAG_05122,UMAG_12169,UMAG_05480,UMAG_10277,UMAG_03884,UMAG_05194,UMAG_00096,UMAG_00050,UMAG_00480,UMAG_05718,UMAG_02062,UMAG_11500,UMAG_02585,UMAG_05979,UMAG_00204,UMAG_03888,UMAG_06391,UMAG_15043,UMAG_03156,UMAG_01640,UMAG_05232,UMAG_12080,UMAG_11407,UMAG_06009,UMAG_02436,UMA…
GO:CC	Depleted	plasma membrane	GO:0071944	cell periphery	5.13627e-15	329	754	88	UMAG_10606,UMAG_00371,UMAG_05809,UMAG_00696,UMAG_04347,UMAG_01639,UMAG_05811,UMAG_02598,UMAG_10367,UMAG_02581,UMAG_02730,UMAG_05122,UMAG_03924,UMAG_12169,UMAG_05480,UMAG_10277,UMAG_03884,UMAG_05194,UMAG_00096,UMAG_00050,UMAG_15034,UMAG_00480,UMAG_05718,UMAG_02062,UMAG_11500,UMAG_02585,UMAG_05979,UMAG_00204,UMAG_03888,UMAG_06391,UMAG_15043,UMAG_03156,UMAG_01640,UMAG_05232,UMAG_12080,UMAG_11407,UMA…
GO:CC	Depleted	plasma membrane	GO:0005887	integral component of plasma membrane	2.47111e-07	65	855	27	UMAG_00696,UMAG_04347,UMAG_02598,UMAG_12169,UMAG_00480,UMAG_02062,UMAG_02585,UMAG_03888,UMAG_06391,UMAG_05421,UMAG_04410,UMAG_03876,UMAG_11777,UMAG_01882,UMAG_01429,UMAG_01258,UMAG_05968,UMAG_00034,UMAG_15017,UMAG_04523,UMAG_01964,UMAG_06349,UMAG_05889,UMAG_00815,UMAG_02869,UMAG_03619,UMAG_05248
GO:CC	Depleted	plasma membrane	GO:0031226	intrinsic component of plasma membrane	5.50747e-07	67	855	27	UMAG_00696,UMAG_04347,UMAG_02598,UMAG_12169,UMAG_00480,UMAG_02062,UMAG_02585,UMAG_03888,UMAG_06391,UMAG_05421,UMAG_04410,UMAG_03876,UMAG_11777,UMAG_01882,UMAG_01429,UMAG_01258,UMAG_05968,UMAG_00034,UMAG_15017,UMAG_04523,UMAG_01964,UMAG_06349,UMAG_05889,UMAG_00815,UMAG_02869,UMAG_03619,UMAG_05248
GO:CC	Depleted	plasma membrane	GO:0030428	cell septum	0.0463202	12	85	3	UMAG_10367,UMAG_05480,UMAG_10277
GO:CC	Depleted	cell wall	GO:0005618	cell wall	0.00741706	21	839	10	UMAG_03924,UMAG_01640,UMAG_10975,UMAG_06078,UMAG_06133,UMAG_02356,UMAG_15089,UMAG_12233,UMAG_05704,UMAG_05736
GO:CC	Depleted	cell wall	GO:0030312	external encapsulating structure	0.00741706	21	839	10	UMAG_03924,UMAG_01640,UMAG_10975,UMAG_06078,UMAG_06133,UMAG_02356,UMAG_15089,UMAG_12233,UMAG_05704,UMAG_05736
GO:CC	Depleted	extracellular region	GO:0005576	extracellular region	0.00469394	50	839	17	UMAG_02865,UMAG_06102,UMAG_06098,UMAG_03924,UMAG_00480,UMAG_01937,UMAG_10211,UMAG_03411,UMAG_00235,UMAG_06078,UMAG_12148,UMAG_05731,UMAG_06133,UMAG_12233,UMAG_04400,UMAG_05109,UMAG_05736
GO:CC	Depleted	extracellular region	GO:0009986	cell surface	0.0322345	12	610	6	UMAG_06102,UMAG_00480,UMAG_10211,UMAG_00235,UMAG_06078,UMAG_06133
GO:MF	Depleted	transmembrane transporter	GO:0005215	transporter activity	1.59758e-38	384	675	128	UMAG_10365,UMAG_00477,UMAG_10606,UMAG_00371,UMAG_05794,UMAG_00712,UMAG_00450,UMAG_05411,UMAG_00696,UMAG_05253,UMAG_15074,UMAG_04478,UMAG_04347,UMAG_04923,UMAG_04771,UMAG_02598,UMAG_05034,UMAG_03861,UMAG_02581,UMAG_02686,UMAG_05122,UMAG_12169,UMAG_03470,UMAG_00343,UMAG_03884,UMAG_11514,UMAG_05346,UMAG_10400,UMAG_00096,UMAG_02568,UMAG_02237,UMAG_02062,UMAG_11829,UMAG_02993,UMAG_02081,UMAG_10170,UMA…
GO:MF	Depleted	transmembrane transporter	GO:0022857	transmembrane transporter activity	2.14113e-36	367	675	122	UMAG_10365,UMAG_00477,UMAG_10606,UMAG_00371,UMAG_05794,UMAG_00712,UMAG_00450,UMAG_05411,UMAG_00696,UMAG_05253,UMAG_15074,UMAG_04478,UMAG_04347,UMAG_04923,UMAG_04771,UMAG_02598,UMAG_05034,UMAG_03861,UMAG_02581,UMAG_02686,UMAG_05122,UMAG_12169,UMAG_03470,UMAG_00343,UMAG_03884,UMAG_11514,UMAG_05346,UMAG_10400,UMAG_00096,UMAG_02568,UMAG_02237,UMAG_02062,UMAG_11829,UMAG_02993,UMAG_02081,UMAG_10170,UMA…
GO:MF	Depleted	transmembrane transporter	GO:0015318	inorganic molecular entity transmembrane transporter activity	9.0447e-24	201	974	88	UMAG_10606,UMAG_00371,UMAG_05411,UMAG_04478,UMAG_04923,UMAG_04771,UMAG_02581,UMAG_05122,UMAG_03470,UMAG_00343,UMAG_03884,UMAG_11514,UMAG_00096,UMAG_02568,UMAG_02237,UMAG_11829,UMAG_02993,UMAG_02081,UMAG_11500,UMAG_05458,UMAG_04550,UMAG_02154,UMAG_00204,UMAG_05023,UMAG_05420,UMAG_15043,UMAG_01656,UMAG_10378,UMAG_11407,UMAG_10608,UMAG_04319,UMAG_04423,UMAG_04602,UMAG_01205,UMAG_02221,UMAG_10048,UMA…
GO:MF	Depleted	transmembrane transporter	GO:0022804	active transmembrane transporter activity	1.45444e-23	97	797	53	UMAG_10365,UMAG_05794,UMAG_00712,UMAG_00450,UMAG_05411,UMAG_05253,UMAG_15074,UMAG_04478,UMAG_04923,UMAG_04771,UMAG_03861,UMAG_02686,UMAG_05122,UMAG_12169,UMAG_11514,UMAG_10400,UMAG_02568,UMAG_11829,UMAG_10170,UMAG_05023,UMAG_01656,UMAG_04674,UMAG_10608,UMAG_04319,UMAG_06009,UMAG_02796,UMAG_01062,UMAG_04602,UMAG_03876,UMAG_11171,UMAG_04056,UMAG_03812,UMAG_03034,UMAG_05132,UMAG_05825,UMAG_06148,UMA…
GO:MF	Depleted	transmembrane transporter	GO:0022890	inorganic cation transmembrane transporter activity	4.01774e-23	124	890	63	UMAG_10606,UMAG_05411,UMAG_04478,UMAG_04923,UMAG_04771,UMAG_02581,UMAG_03470,UMAG_03884,UMAG_11514,UMAG_00096,UMAG_02237,UMAG_11829,UMAG_02993,UMAG_02081,UMAG_11500,UMAG_04550,UMAG_00204,UMAG_05023,UMAG_05420,UMAG_15043,UMAG_01656,UMAG_11407,UMAG_10608,UMAG_04319,UMAG_04423,UMAG_04602,UMAG_01205,UMAG_10048,UMAG_03876,UMAG_11171,UMAG_10653,UMAG_03812,UMAG_03034,UMAG_05132,UMAG_01429,UMAG_05825,UMA…
GO:MF	Depleted	transmembrane transporter	GO:0015075	ion transmembrane transporter activity	1.49864e-21	255	812	89	UMAG_10606,UMAG_00371,UMAG_05794,UMAG_05411,UMAG_15074,UMAG_04478,UMAG_04347,UMAG_04923,UMAG_04771,UMAG_02581,UMAG_05122,UMAG_12169,UMAG_03470,UMAG_00343,UMAG_03884,UMAG_11514,UMAG_00096,UMAG_02568,UMAG_02237,UMAG_11829,UMAG_02993,UMAG_02081,UMAG_11500,UMAG_10195,UMAG_05458,UMAG_04550,UMAG_02154,UMAG_00204,UMAG_05023,UMAG_05420,UMAG_15043,UMAG_01656,UMAG_10378,UMAG_11407,UMAG_10608,UMAG_04319,UMA…
GO:MF	Depleted	transmembrane transporter	GO:0008324	cation transmembrane transporter activity	1.88801e-20	143	890	65	UMAG_10606,UMAG_05411,UMAG_04478,UMAG_04923,UMAG_04771,UMAG_02581,UMAG_03470,UMAG_03884,UMAG_11514,UMAG_00096,UMAG_02237,UMAG_11829,UMAG_02993,UMAG_02081,UMAG_11500,UMAG_04550,UMAG_00204,UMAG_05023,UMAG_05420,UMAG_15043,UMAG_01656,UMAG_11407,UMAG_10608,UMAG_04319,UMAG_04423,UMAG_04602,UMAG_01205,UMAG_02221,UMAG_10048,UMAG_03876,UMAG_11171,UMAG_10653,UMAG_03812,UMAG_03034,UMAG_05132,UMAG_01429,UMA…
GO:MF	Depleted	transmembrane transporter	GO:0022853	active ion transmembrane transporter activity	1.33719e-15	60	1113	39	UMAG_05794,UMAG_05411,UMAG_15074,UMAG_04478,UMAG_04923,UMAG_04771,UMAG_05122,UMAG_11514,UMAG_02568,UMAG_11829,UMAG_05023,UMAG_01656,UMAG_10608,UMAG_04319,UMAG_04602,UMAG_03876,UMAG_11171,UMAG_03812,UMAG_03034,UMAG_05132,UMAG_05825,UMAG_06148,UMAG_11751,UMAG_02203,UMAG_06093,UMAG_05972,UMAG_02037,UMAG_02285,UMAG_15056,UMAG_10072,UMAG_00061,UMAG_02869,UMAG_05958,UMAG_02374,UMAG_01156,UMAG_00227,UMA…
GO:MF	Depleted	transmembrane transporter	GO:0015291	secondary active transmembrane transporter activity	1.25723e-14	64	890	36	UMAG_05411,UMAG_04478,UMAG_04923,UMAG_04771,UMAG_05122,UMAG_12169,UMAG_11514,UMAG_10400,UMAG_11829,UMAG_05023,UMAG_01656,UMAG_10608,UMAG_04319,UMAG_01062,UMAG_04602,UMAG_03876,UMAG_11171,UMAG_03812,UMAG_03034,UMAG_05132,UMAG_05825,UMAG_06148,UMAG_11751,UMAG_02203,UMAG_06093,UMAG_05972,UMAG_02037,UMAG_02285,UMAG_10072,UMAG_04060,UMAG_00061,UMAG_02869,UMAG_05958,UMAG_02374,UMAG_11998,UMAG_01156
GO:MF	Depleted	transmembrane transporter	GO:0046873	metal ion transmembrane transporter activity	7.65673e-13	48	962	30	UMAG_04923,UMAG_03470,UMAG_00096,UMAG_02237,UMAG_02993,UMAG_02081,UMAG_11500,UMAG_04550,UMAG_05420,UMAG_04423,UMAG_04602,UMAG_03812,UMAG_05132,UMAG_01429,UMAG_05825,UMAG_01797,UMAG_01258,UMAG_05038,UMAG_11751,UMAG_10210,UMAG_10559,UMAG_02285,UMAG_15056,UMAG_03028,UMAG_02465,UMAG_02316,UMAG_15030,UMAG_00105,UMAG_04461,UMAG_00227
GO:MF	Depleted	transmembrane transporter	GO:0015078	proton transmembrane transporter activity	2.35111e-11	76	797	34	UMAG_05411,UMAG_04478,UMAG_04771,UMAG_02581,UMAG_11514,UMAG_11829,UMAG_02081,UMAG_00204,UMAG_05023,UMAG_15043,UMAG_01656,UMAG_10608,UMAG_04319,UMAG_01205,UMAG_10048,UMAG_03876,UMAG_11171,UMAG_03812,UMAG_03034,UMAG_05132,UMAG_05825,UMAG_06148,UMAG_11751,UMAG_00630,UMAG_02203,UMAG_06093,UMAG_05972,UMAG_02037,UMAG_02285,UMAG_10072,UMAG_00061,UMAG_02869,UMAG_05958,UMAG_02374
GO:MF	Depleted	transmembrane transporter	GO:0042626	ATPase-coupled transmembrane transporter activity	8.15325e-11	31	632	19	UMAG_10365,UMAG_05794,UMAG_00712,UMAG_00450,UMAG_05253,UMAG_15074,UMAG_03861,UMAG_02686,UMAG_02568,UMAG_10170,UMAG_04674,UMAG_06009,UMAG_02796,UMAG_04056,UMAG_02258,UMAG_05642,UMAG_03454,UMAG_10528,UMAG_15056
GO:MF	Depleted	transmembrane transporter	GO:0015399	primary active transmembrane transporter activity	3.98132e-10	33	632	19	UMAG_10365,UMAG_05794,UMAG_00712,UMAG_00450,UMAG_05253,UMAG_15074,UMAG_03861,UMAG_02686,UMAG_02568,UMAG_10170,UMAG_04674,UMAG_06009,UMAG_02796,UMAG_04056,UMAG_02258,UMAG_05642,UMAG_03454,UMAG_10528,UMAG_15056
GO:MF	Depleted	transmembrane transporter	GO:0015293	symporter activity	4.72994e-10	29	890	20	UMAG_05411,UMAG_04478,UMAG_12169,UMAG_11514,UMAG_11829,UMAG_05023,UMAG_01656,UMAG_10608,UMAG_04602,UMAG_11171,UMAG_03034,UMAG_06093,UMAG_05972,UMAG_02037,UMAG_10072,UMAG_00061,UMAG_02869,UMAG_05958,UMAG_02374,UMAG_01156
GO:MF	Depleted	transmembrane transporter	GO:0008509	anion transmembrane transporter activity	1.93233e-09	152	1113	58	UMAG_05794,UMAG_05411,UMAG_15074,UMAG_04478,UMAG_04347,UMAG_05122,UMAG_12169,UMAG_00343,UMAG_11514,UMAG_02568,UMAG_11829,UMAG_10195,UMAG_02154,UMAG_05023,UMAG_01656,UMAG_10378,UMAG_10608,UMAG_01062,UMAG_04602,UMAG_06138,UMAG_02221,UMAG_03876,UMAG_11171,UMAG_00068,UMAG_03700,UMAG_03812,UMAG_02459,UMAG_03034,UMAG_01882,UMAG_05825,UMAG_05968,UMAG_06093,UMAG_10814,UMAG_05972,UMAG_02037,UMAG_01964,UMA…
GO:MF	Depleted	transmembrane transporter	GO:0015294	solute:cation symporter activity	2.64173e-09	28	890	19	UMAG_05411,UMAG_04478,UMAG_11514,UMAG_11829,UMAG_05023,UMAG_01656,UMAG_10608,UMAG_04602,UMAG_11171,UMAG_03034,UMAG_06093,UMAG_05972,UMAG_02037,UMAG_10072,UMAG_00061,UMAG_02869,UMAG_05958,UMAG_02374,UMAG_01156
GO:MF	Depleted	transmembrane transporter	GO:0015295	solute:proton symporter activity	5.47723e-09	26	890	18	UMAG_05411,UMAG_04478,UMAG_11514,UMAG_11829,UMAG_05023,UMAG_01656,UMAG_10608,UMAG_11171,UMAG_03034,UMAG_06093,UMAG_05972,UMAG_02037,UMAG_10072,UMAG_00061,UMAG_02869,UMAG_05958,UMAG_02374,UMAG_01156
GO:MF	Depleted	transmembrane transporter	GO:0005351	carbohydrate:proton symporter activity	2.63094e-08	21	797	15	UMAG_05411,UMAG_11514,UMAG_11829,UMAG_05023,UMAG_01656,UMAG_10608,UMAG_11171,UMAG_06093,UMAG_05972,UMAG_02037,UMAG_10072,UMAG_00061,UMAG_02869,UMAG_05958,UMAG_02374
GO:MF	Depleted	transmembrane transporter	GO:0005402	carbohydrate:cation symporter activity	2.63094e-08	21	797	15	UMAG_05411,UMAG_11514,UMAG_11829,UMAG_05023,UMAG_01656,UMAG_10608,UMAG_11171,UMAG_06093,UMAG_05972,UMAG_02037,UMAG_10072,UMAG_00061,UMAG_02869,UMAG_05958,UMAG_02374
GO:MF	Depleted	transmembrane transporter	GO:0015144	carbohydrate transmembrane transporter activity	2.63094e-08	21	797	15	UMAG_05411,UMAG_11514,UMAG_11829,UMAG_05023,UMAG_01656,UMAG_10608,UMAG_11171,UMAG_06093,UMAG_05972,UMAG_02037,UMAG_10072,UMAG_00061,UMAG_02869,UMAG_05958,UMAG_02374
GO:MF	Depleted	transmembrane transporter	GO:0015299	solute:proton antiporter activity	1.94914e-07	12	606	10	UMAG_04771,UMAG_04319,UMAG_03876,UMAG_03812,UMAG_05132,UMAG_05825,UMAG_06148,UMAG_11751,UMAG_02203,UMAG_02285
GO:MF	Depleted	transmembrane transporter	GO:0015298	solute:cation antiporter activity	2.89854e-07	15	606	11	UMAG_04923,UMAG_04771,UMAG_04319,UMAG_03876,UMAG_03812,UMAG_05132,UMAG_05825,UMAG_06148,UMAG_11751,UMAG_02203,UMAG_02285
GO:MF	Depleted	transmembrane transporter	GO:0015297	antiporter activity	4.92626e-06	27	675	14	UMAG_04923,UMAG_04771,UMAG_10400,UMAG_04319,UMAG_01062,UMAG_03876,UMAG_03812,UMAG_05132,UMAG_05825,UMAG_06148,UMAG_11751,UMAG_02203,UMAG_02285,UMAG_04060
GO:MF	Depleted	transmembrane transporter	GO:0015085	calcium ion transmembrane transporter activity	5.98997e-06	16	543	10	UMAG_04923,UMAG_03470,UMAG_02237,UMAG_02081,UMAG_04550,UMAG_05132,UMAG_05825,UMAG_05038,UMAG_11751,UMAG_10559
GO:MF	Depleted	transmembrane transporter	GO:0016887	ATPase activity	8.57443e-05	222	601	42	UMAG_10365,UMAG_05794,UMAG_00712,UMAG_00450,UMAG_05253,UMAG_15074,UMAG_04065,UMAG_03861,UMAG_02581,UMAG_02686,UMAG_04095,UMAG_02568,UMAG_15034,UMAG_02081,UMAG_10170,UMAG_11008,UMAG_00204,UMAG_15043,UMAG_04674,UMAG_12155,UMAG_06009,UMAG_02436,UMAG_02796,UMAG_10648,UMAG_00790,UMAG_01205,UMAG_06487,UMAG_03293,UMAG_04878,UMAG_04056,UMAG_00372,UMAG_04394,UMAG_05200,UMAG_02258,UMAG_05642,UMAG_01700,UMA…
GO:MF	Depleted	transmembrane transporter	GO:0022836	gated channel activity	0.00024577	9	369	6	UMAG_10606,UMAG_03884,UMAG_05458,UMAG_11407,UMAG_03876,UMAG_10653
GO:MF	Depleted	transmembrane transporter	GO:0005216	ion channel activity	0.000828762	29	543	11	UMAG_10606,UMAG_00371,UMAG_03884,UMAG_02237,UMAG_05458,UMAG_04550,UMAG_11407,UMAG_03876,UMAG_10653,UMAG_10854,UMAG_10559
GO:MF	Depleted	transmembrane transporter	GO:0005227	calcium activated cation channel activity	0.00125464	4	369	4	UMAG_10606,UMAG_03884,UMAG_11407,UMAG_10653
GO:MF	Depleted	transmembrane transporter	GO:0022839	ion gated channel activity	0.00125464	4	369	4	UMAG_10606,UMAG_03884,UMAG_11407,UMAG_10653
GO:MF	Depleted	transmembrane transporter	GO:0015662	ion transmembrane transporter activity, phosphorylative mechanism	0.00182009	13	504	7	UMAG_02581,UMAG_03470,UMAG_02081,UMAG_00204,UMAG_15043,UMAG_01205,UMAG_05038
GO:MF	Depleted	transmembrane transporter	GO:0051139	metal ion:proton antiporter activity	0.00436865	6	606	5	UMAG_03812,UMAG_05132,UMAG_05825,UMAG_11751,UMAG_02285
GO:MF	Depleted	transmembrane transporter	GO:0005451	monovalent cation:proton antiporter activity	0.00436865	6	606	5	UMAG_03812,UMAG_05132,UMAG_05825,UMAG_11751,UMAG_02285
GO:MF	Depleted	transmembrane transporter	GO:0015491	cation:cation antiporter activity	0.00447106	9	606	6	UMAG_04923,UMAG_03812,UMAG_05132,UMAG_05825,UMAG_11751,UMAG_02285
GO:MF	Depleted	transmembrane transporter	GO:0015171	amino acid transmembrane transporter activity	0.00494798	37	925	15	UMAG_00343,UMAG_02154,UMAG_10378,UMAG_02221,UMAG_00068,UMAG_03700,UMAG_02459,UMAG_01882,UMAG_10814,UMAG_01964,UMAG_02791,UMAG_03325,UMAG_00056,UMAG_02146,UMAG_11954
GO:MF	Depleted	transmembrane transporter	GO:0015079	potassium ion transmembrane transporter activity	0.00566958	7	502	5	UMAG_04423,UMAG_04602,UMAG_03812,UMAG_05825,UMAG_01258
GO:MF	Depleted	transmembrane transporter	GO:0008553	proton-exporting ATPase activity, phosphorylative mechanism	0.00671254	10	321	5	UMAG_02581,UMAG_02081,UMAG_00204,UMAG_15043,UMAG_01205
GO:MF	Depleted	transmembrane transporter	GO:0046943	carboxylic acid transmembrane transporter activity	0.00795705	53	1070	20	UMAG_05122,UMAG_00343,UMAG_02568,UMAG_02154,UMAG_10378,UMAG_02221,UMAG_00068,UMAG_03700,UMAG_02459,UMAG_01882,UMAG_10814,UMAG_01964,UMAG_02791,UMAG_03325,UMAG_04060,UMAG_00056,UMAG_02146,UMAG_11954,UMAG_00196,UMAG_00679
GO:MF	Depleted	transmembrane transporter	GO:0005342	organic acid transmembrane transporter activity	0.00795705	53	1070	20	UMAG_05122,UMAG_00343,UMAG_02568,UMAG_02154,UMAG_10378,UMAG_02221,UMAG_00068,UMAG_03700,UMAG_02459,UMAG_01882,UMAG_10814,UMAG_01964,UMAG_02791,UMAG_03325,UMAG_04060,UMAG_00056,UMAG_02146,UMAG_11954,UMAG_00196,UMAG_00679
GO:MF	Depleted	transmembrane transporter	GO:0022803	passive transmembrane transporter activity	0.00875523	36	543	11	UMAG_10606,UMAG_00371,UMAG_03884,UMAG_02237,UMAG_05458,UMAG_04550,UMAG_11407,UMAG_03876,UMAG_10653,UMAG_10854,UMAG_10559
GO:MF	Depleted	transmembrane transporter	GO:0015267	channel activity	0.00875523	36	543	11	UMAG_10606,UMAG_00371,UMAG_03884,UMAG_02237,UMAG_05458,UMAG_04550,UMAG_11407,UMAG_03876,UMAG_10653,UMAG_10854,UMAG_10559
GO:MF	Depleted	transmembrane transporter	GO:0015440	ABC-type peptide transporter activity	0.00967895	5	128	3	UMAG_05794,UMAG_15074,UMAG_02568
GO:MF	Depleted	transmembrane transporter	GO:0140359	ABC-type transporter activity	0.0107648	7	266	4	UMAG_05794,UMAG_15074,UMAG_02568,UMAG_06009
GO:MF	Depleted	transmembrane transporter	GO:0015174	basic amino acid transmembrane transporter activity	0.0135474	5	1070	5	UMAG_02221,UMAG_01882,UMAG_10814,UMAG_01964,UMAG_00679
GO:MF	Depleted	transmembrane transporter	GO:0015368	calcium:cation antiporter activity	0.0216754	5	510	4	UMAG_04923,UMAG_05132,UMAG_05825,UMAG_11751
GO:MF	Depleted	transmembrane transporter	GO:1904680	peptide transmembrane transporter activity	0.0234715	21	177	5	UMAG_05794,UMAG_15074,UMAG_04347,UMAG_02568,UMAG_10195
GO:MF	Depleted	transmembrane transporter	GO:0046915	transition metal ion transmembrane transporter activity	0.0407936	18	962	9	UMAG_00096,UMAG_11500,UMAG_05420,UMAG_01429,UMAG_10210,UMAG_15056,UMAG_00105,UMAG_04461,UMAG_00227
GO:MF	Depleted	transcription regulator	GO:0003700	DNA-binding transcription factor activity	0.000549577	178	1112	52	UMAG_02775,UMAG_12332,UMAG_01667,UMAG_03296,UMAG_00316,UMAG_02835,UMAG_12189,UMAG_01042,UMAG_05862,UMAG_11679,UMAG_06280,UMAG_01597,UMAG_10560,UMAG_11357,UMAG_12004,UMAG_02052,UMAG_11326,UMAG_10626,UMAG_11486,UMAG_00895,UMAG_02209,UMAG_10009,UMAG_10668,UMAG_15078,UMAG_15065,UMAG_02857,UMAG_10368,UMAG_11982,UMAG_00750,UMAG_10181,UMAG_01908,UMAG_11582,UMAG_15088,UMAG_03514,UMAG_04875,UMAG_00473,UMA…
GO:MF	Depleted	transcription regulator	GO:0140110	transcription regulator activity	0.000650381	226	1112	62	UMAG_02775,UMAG_12332,UMAG_01667,UMAG_03296,UMAG_12008,UMAG_00316,UMAG_02835,UMAG_00983,UMAG_12189,UMAG_01042,UMAG_05862,UMAG_11679,UMAG_06280,UMAG_01597,UMAG_10560,UMAG_11357,UMAG_12004,UMAG_02052,UMAG_11326,UMAG_10626,UMAG_04812,UMAG_11486,UMAG_00895,UMAG_02209,UMAG_10009,UMAG_10668,UMAG_15078,UMAG_15065,UMAG_02857,UMAG_10368,UMAG_11982,UMAG_00750,UMAG_10181,UMAG_01908,UMAG_11582,UMAG_15088,UMA…
GO:MF	Depleted	transcription regulator	GO:0000976	transcription regulatory region sequence-specific DNA binding	0.00230898	93	1038	30	UMAG_01667,UMAG_02835,UMAG_00983,UMAG_02493,UMAG_05862,UMAG_11679,UMAG_06280,UMAG_01597,UMAG_10560,UMAG_12004,UMAG_02052,UMAG_11326,UMAG_04812,UMAG_06454,UMAG_10668,UMAG_10602,UMAG_15036,UMAG_10368,UMAG_00750,UMAG_10181,UMAG_01908,UMAG_01083,UMAG_11582,UMAG_04875,UMAG_03714,UMAG_05804,UMAG_01573,UMAG_12255,UMAG_04999,UMAG_06308
GO:MF	Depleted	transcription regulator	GO:0001067	regulatory region nucleic acid binding	0.00230898	93	1038	30	UMAG_01667,UMAG_02835,UMAG_00983,UMAG_02493,UMAG_05862,UMAG_11679,UMAG_06280,UMAG_01597,UMAG_10560,UMAG_12004,UMAG_02052,UMAG_11326,UMAG_04812,UMAG_06454,UMAG_10668,UMAG_10602,UMAG_15036,UMAG_10368,UMAG_00750,UMAG_10181,UMAG_01908,UMAG_01083,UMAG_11582,UMAG_04875,UMAG_03714,UMAG_05804,UMAG_01573,UMAG_12255,UMAG_04999,UMAG_06308
GO:MF	Depleted	transcription regulator	GO:0000981	DNA-binding transcription factor activity, RNA polymerase II-specific	0.00257381	145	1112	43	UMAG_12332,UMAG_01667,UMAG_00316,UMAG_02835,UMAG_12189,UMAG_01042,UMAG_05862,UMAG_11679,UMAG_06280,UMAG_01597,UMAG_10560,UMAG_11357,UMAG_12004,UMAG_02052,UMAG_11326,UMAG_02209,UMAG_10009,UMAG_10668,UMAG_15078,UMAG_15065,UMAG_02857,UMAG_11982,UMAG_00750,UMAG_10181,UMAG_01908,UMAG_11582,UMAG_15088,UMAG_03514,UMAG_04875,UMAG_00473,UMAG_03714,UMAG_03403,UMAG_02602,UMAG_01573,UMAG_05401,UMAG_12255,UMA…
GO:MF	Depleted	transcription regulator	GO:0043565	sequence-specific DNA binding	0.0288064	164	1112	44	UMAG_12332,UMAG_01667,UMAG_03296,UMAG_02835,UMAG_00983,UMAG_02493,UMAG_01042,UMAG_05862,UMAG_11679,UMAG_06280,UMAG_01597,UMAG_10560,UMAG_12004,UMAG_02052,UMAG_11326,UMAG_04812,UMAG_11486,UMAG_00586,UMAG_00895,UMAG_06454,UMAG_10668,UMAG_10602,UMAG_02857,UMAG_15036,UMAG_10368,UMAG_00750,UMAG_10181,UMAG_01908,UMAG_01083,UMAG_11582,UMAG_04875,UMAG_03714,UMAG_05804,UMAG_02268,UMAG_02664,UMAG_03680,UMA…
GO:MF	Depleted	transcription regulator	GO:0000977	RNA polymerase II transcription regulatory region sequence-specific DNA binding	0.03779	60	1038	20	UMAG_01667,UMAG_02835,UMAG_00983,UMAG_05862,UMAG_06280,UMAG_01597,UMAG_10560,UMAG_12004,UMAG_02052,UMAG_11326,UMAG_10668,UMAG_15036,UMAG_10368,UMAG_00750,UMAG_10181,UMAG_01908,UMAG_04875,UMAG_03714,UMAG_04999,UMAG_06308
GO:MF	Depleted	small molecule sensor	GO:0140299	small molecule sensor activity	7.80329e-05	10	1101	9	UMAG_00480,UMAG_03156,UMAG_00239,UMAG_10574,UMAG_15017,UMAG_04907,UMAG_05732,UMAG_02739,UMAG_11957
GO:MF	Depleted	small molecule sensor	GO:0060089	molecular transducer activity	0.00454212	16	1101	10	UMAG_00371,UMAG_00480,UMAG_03156,UMAG_11073,UMAG_00239,UMAG_01580,UMAG_15017,UMAG_04907,UMAG_05732,UMAG_11957
GO:MF	Depleted	small molecule sensor	GO:0016775	phosphotransferase activity, nitrogenous group as acceptor	0.0147382	7	1101	6	UMAG_00239,UMAG_15017,UMAG_04907,UMAG_05732,UMAG_02739,UMAG_11957
GO:MF	Depleted	small molecule sensor	GO:0004673	protein histidine kinase activity	0.0147382	7	1101	6	UMAG_00239,UMAG_15017,UMAG_04907,UMAG_05732,UMAG_02739,UMAG_11957
GO:MF	Depleted	small molecule sensor	GO:0000155	phosphorelay sensor kinase activity	0.0147382	7	1101	6	UMAG_00239,UMAG_15017,UMAG_04907,UMAG_05732,UMAG_02739,UMAG_11957
GO:MF	Depleted	small molecule sensor	GO:0004888	transmembrane signaling receptor activity	0.019729	5	498	4	UMAG_00480,UMAG_03156,UMAG_11073,UMAG_01580
GO:MF	Depleted	oxidoreductase	GO:0016705	oxidoreductase activity, acting on paired donors, with incorporation or reduction of molecular oxygen	0.00246896	61	1077	23	UMAG_04109,UMAG_00955,UMAG_04189,UMAG_00005,UMAG_03597,UMAG_05791,UMAG_05880,UMAG_04029,UMAG_11819,UMAG_05449,UMAG_10070,UMAG_06273,UMAG_03662,UMAG_01980,UMAG_11424,UMAG_01863,UMAG_04362,UMAG_10062,UMAG_05619,UMAG_05329,UMAG_01723,UMAG_04181,UMAG_03593
GO:MF	Depleted	oxidoreductase	GO:0046906	tetrapyrrole binding	0.00463229	44	953	17	UMAG_04109,UMAG_00955,UMAG_02779,UMAG_04189,UMAG_00005,UMAG_03597,UMAG_05791,UMAG_03647,UMAG_10070,UMAG_03662,UMAG_01980,UMAG_04971,UMAG_03832,UMAG_01863,UMAG_04362,UMAG_03845,UMAG_01723
GO:MF	Depleted	oxidoreductase	GO:0020037	heme binding	0.00463229	44	953	17	UMAG_04109,UMAG_00955,UMAG_02779,UMAG_04189,UMAG_00005,UMAG_03597,UMAG_05791,UMAG_03647,UMAG_10070,UMAG_03662,UMAG_01980,UMAG_04971,UMAG_03832,UMAG_01863,UMAG_04362,UMAG_03845,UMAG_01723
GO:MF	Depleted	oxidoreductase	GO:0005506	iron ion binding	0.0215261	56	1077	20	UMAG_04109,UMAG_04189,UMAG_00005,UMAG_05988,UMAG_03597,UMAG_05791,UMAG_05880,UMAG_04029,UMAG_03647,UMAG_11819,UMAG_10070,UMAG_06273,UMAG_03662,UMAG_01980,UMAG_01863,UMAG_04362,UMAG_05619,UMAG_01723,UMAG_04181,UMAG_03593
GO:MF	Depleted	oxidoreductase	GO:0004497	monooxygenase activity	0.0260195	54	953	18	UMAG_04109,UMAG_04189,UMAG_00005,UMAG_03597,UMAG_05791,UMAG_05880,UMAG_04029,UMAG_10070,UMAG_06273,UMAG_03662,UMAG_01980,UMAG_11424,UMAG_01863,UMAG_04362,UMAG_10062,UMAG_05619,UMAG_05329,UMAG_01723
GO:MF	Depleted	glycosyltransferase	GO:0016758	transferase activity, transferring hexosyl groups	1.57581e-05	60	757	22	UMAG_06205,UMAG_01639,UMAG_10367,UMAG_05480,UMAG_10277,UMAG_15072,UMAG_01512,UMAG_03204,UMAG_10749,UMAG_11220,UMAG_06295,UMAG_04496,UMAG_04649,UMAG_05433,UMAG_05209,UMAG_11784,UMAG_05293,UMAG_11347,UMAG_06088,UMAG_12181,UMAG_05769,UMAG_03658
GO:MF	Depleted	glycosyltransferase	GO:0016757	transferase activity, transferring glycosyl groups	0.00108013	80	757	23	UMAG_06205,UMAG_01639,UMAG_10367,UMAG_05480,UMAG_10277,UMAG_15072,UMAG_01512,UMAG_03204,UMAG_10749,UMAG_11220,UMAG_06295,UMAG_04496,UMAG_04994,UMAG_04649,UMAG_05433,UMAG_05209,UMAG_11784,UMAG_05293,UMAG_11347,UMAG_06088,UMAG_12181,UMAG_05769,UMAG_03658
GO:MF	Depleted	glycosyltransferase	GO:0000030	mannosyltransferase activity	0.00151487	23	611	10	UMAG_06205,UMAG_15072,UMAG_10749,UMAG_11220,UMAG_06295,UMAG_04649,UMAG_05433,UMAG_05209,UMAG_11347,UMAG_06088
GO:MF	Depleted	glycosyltransferase	GO:0004100	chitin synthase activity	0.0154181	8	85	3	UMAG_10367,UMAG_05480,UMAG_10277
GO:MF	Depleted	glycosyltransferase	GO:0008194	UDP-glycosyltransferase activity	0.0248499	23	85	4	UMAG_01639,UMAG_10367,UMAG_05480,UMAG_10277
GO:MF	Depleted	lipid transporter	GO:0140326	ATPase-coupled intramembrane lipid transporter activity	0.00314732	4	464	4	UMAG_02436,UMAG_10648,UMAG_03293,UMAG_04394
GO:MF	Depleted	lipid transporter	GO:0140303	intramembrane lipid transporter activity	0.0149157	5	464	4	UMAG_02436,UMAG_10648,UMAG_03293,UMAG_04394
GO:MF	Depleted	lipid transporter	GO:0005319	lipid transporter activity	0.0406936	23	556	8	UMAG_02436,UMAG_10648,UMAG_02221,UMAG_03293,UMAG_02433,UMAG_04394,UMAG_01580,UMAG_03454
GO:MF	Depleted	glycosyl hydrolase	GO:0004553	hydrolase activity, hydrolyzing O-glycosyl compounds	2.60968e-05	91	621	25	UMAG_05809,UMAG_05811,UMAG_06102,UMAG_04357,UMAG_04354,UMAG_05229,UMAG_03122,UMAG_05718,UMAG_00655,UMAG_10494,UMAG_15051,UMAG_00695,UMAG_03569,UMAG_02740,UMAG_00446,UMAG_10211,UMAG_03411,UMAG_11723,UMAG_00235,UMAG_04405,UMAG_06078,UMAG_02134,UMAG_06133,UMAG_02356,UMAG_00857
GO:MF	Depleted	glycosyl hydrolase	GO:0015926	glucosidase activity	8.35513e-05	30	621	13	UMAG_05809,UMAG_05811,UMAG_06102,UMAG_05718,UMAG_15051,UMAG_03569,UMAG_00446,UMAG_10211,UMAG_11723,UMAG_00235,UMAG_06078,UMAG_06133,UMAG_00857
GO:MF	Depleted	glycosyl hydrolase	GO:0016798	hydrolase activity, acting on glycosyl bonds	0.000273849	102	621	25	UMAG_05809,UMAG_05811,UMAG_06102,UMAG_04357,UMAG_04354,UMAG_05229,UMAG_03122,UMAG_05718,UMAG_00655,UMAG_10494,UMAG_15051,UMAG_00695,UMAG_03569,UMAG_02740,UMAG_00446,UMAG_10211,UMAG_03411,UMAG_11723,UMAG_00235,UMAG_04405,UMAG_06078,UMAG_02134,UMAG_06133,UMAG_02356,UMAG_00857
